# Supplementary material
Source: PubMed Central journal article supplement (PMC3275140)

## Regioselective Synthesis of Water Soluble Monophosphate Derivatives of Combretastatin A-1

Rajendra P. Tanpure<sup>†∇</sup>, Benson L. Nguyen<sup>†∇</sup>, Tracy E. Strecker<sup>†</sup>, Savannah Aguirre<sup>†</sup>, Suman Sharma<sup>‡</sup>, David J. Chaplin<sup>‡</sup>, Bronwyn G. Siim<sup>‡</sup>, Ernest Hamel<sup>§</sup>, John W. Lippert III<sup>⊥</sup>, George R. Pettit<sup>⊥</sup>, Mary Lynn Trawick<sup>†</sup>, and Kevin G. Pinney<sup>†\*</sup>

<sup>†</sup>Department of Chemistry and Biochemistry, Baylor University, One Bear Place #97348, Waco, Texas 76798-7348, USA

<sup>‡</sup>OXiGENE Inc., 701 Gateway Blvd., Suite 210, South San Francisco, CA 94080, USA

<sup>§</sup>Screening Technologies Branch, Developmental Therapeutics Program, Division of Cancer Treatment and Diagnosis, National Cancer Institute at Frederick, National Institutes of Health, Frederick, MD 21702, USA

<sup>⊥</sup>Albany Molecular Research Inc., Medicinal Chemistry, 26 Corporate Circle, PO Box 15098, Albany, NY 12212-5098, USA (current address)

<sup>⊥</sup>Cancer Research Institute and Department of Chemistry and Biochemistry, Arizona State University, P.O. Box 871604, Tempe, Arizona 85287-1604, USA

<sup>∇</sup>Authors with equal contributions.

### Table of Contents

- 1) HRMS Spectra for compounds **2a,b-4a,b** and **6a,b-8a,b**. Pages S2'-S13'

RT-5-23\_fs\_Orbi\_+ESI #1-20 RT: 0.00-0.16 AV: 20 NL: 8.76E6  
T: FTMS + p ESI Full ms [55.00-1000.00]

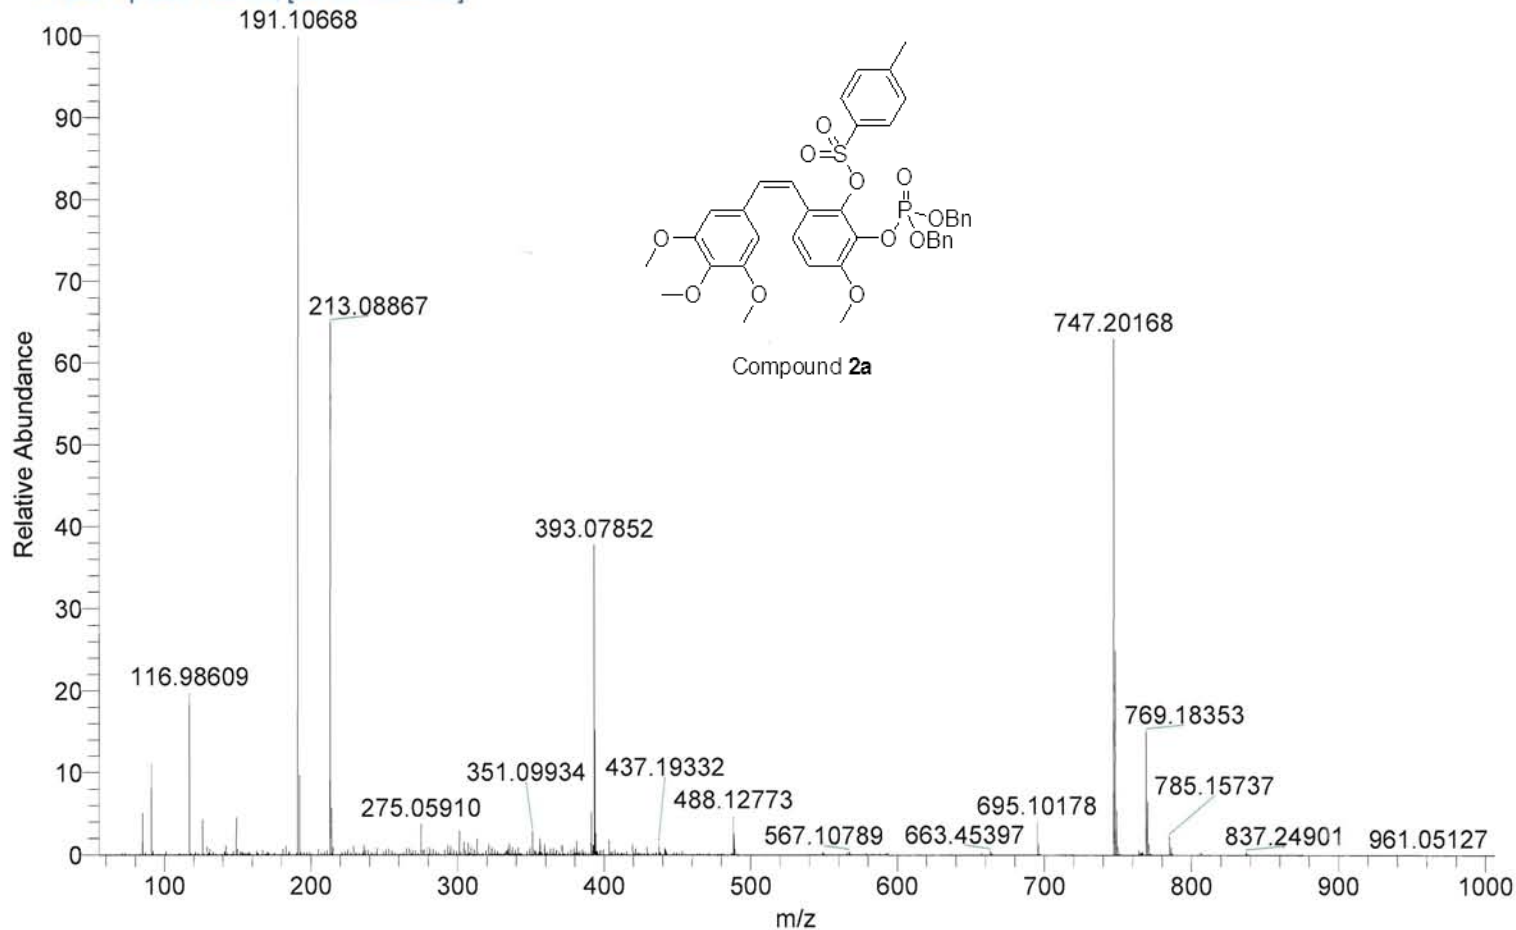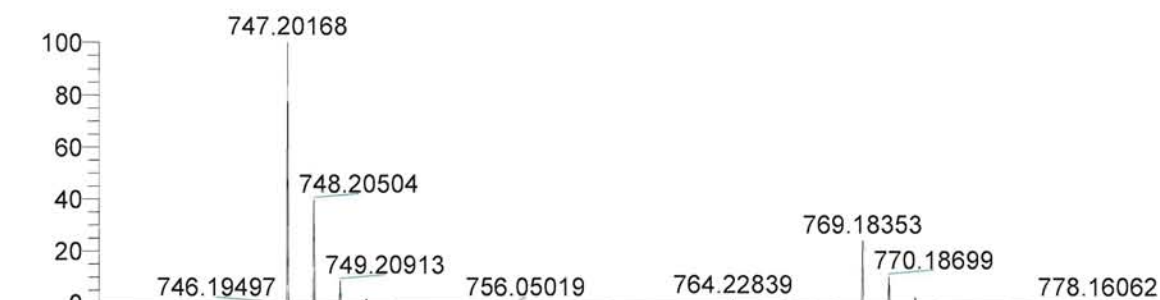

NL:  
5.52E6  
RT-5-23\_fs\_Orbi\_+ESI#1-20  
RT: 0.00-0.16 AV: 20 T:  
FTMS + p ESI Full ms  
[55.00-1000.00]

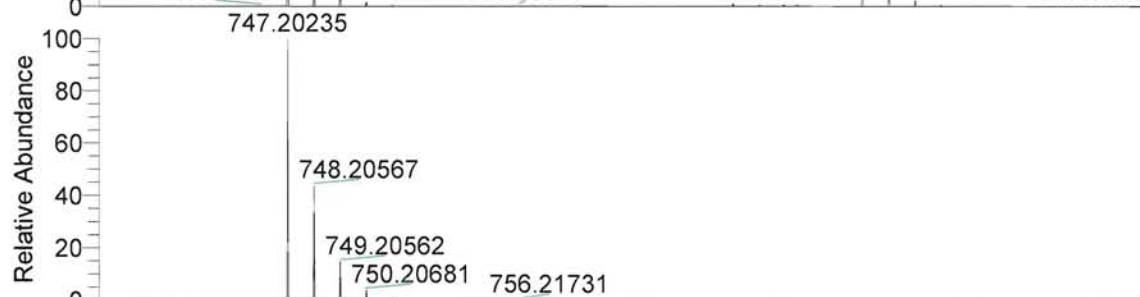

NL:  
1.42E4  
C<sub>39</sub> H<sub>39</sub> O<sub>11</sub> PS +H:  
C<sub>39</sub> H<sub>40</sub> O<sub>11</sub> P<sub>1</sub> S<sub>1</sub>  
p (gss, s /p:40) Chrg 1  
R: 30000 Res .Pwr . @FWHM

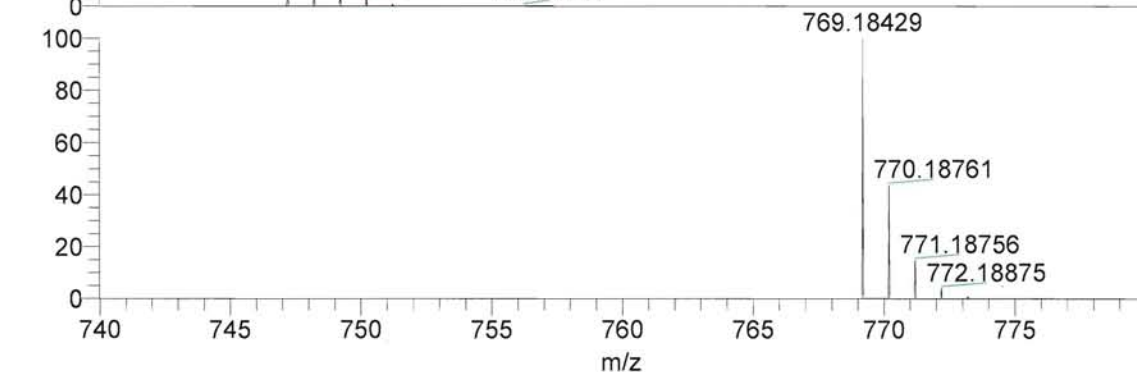

NL:  
1.42E4  
C<sub>39</sub> H<sub>39</sub> O<sub>11</sub> PS +Na:  
C<sub>39</sub> H<sub>39</sub> O<sub>11</sub> P<sub>1</sub> S<sub>1</sub> Na<sub>1</sub>  
p (gss, s /p:40) Chrg 1  
R: 30000 Res .Pwr . @FWHM

RT-4-103\_fs\_Orbi\_+ESI #1-20 RT: 0.00-0.16 AV: 20 NL: 2.80E7  
T: FTMS + p ESI Full ms [150.00-1000.00]

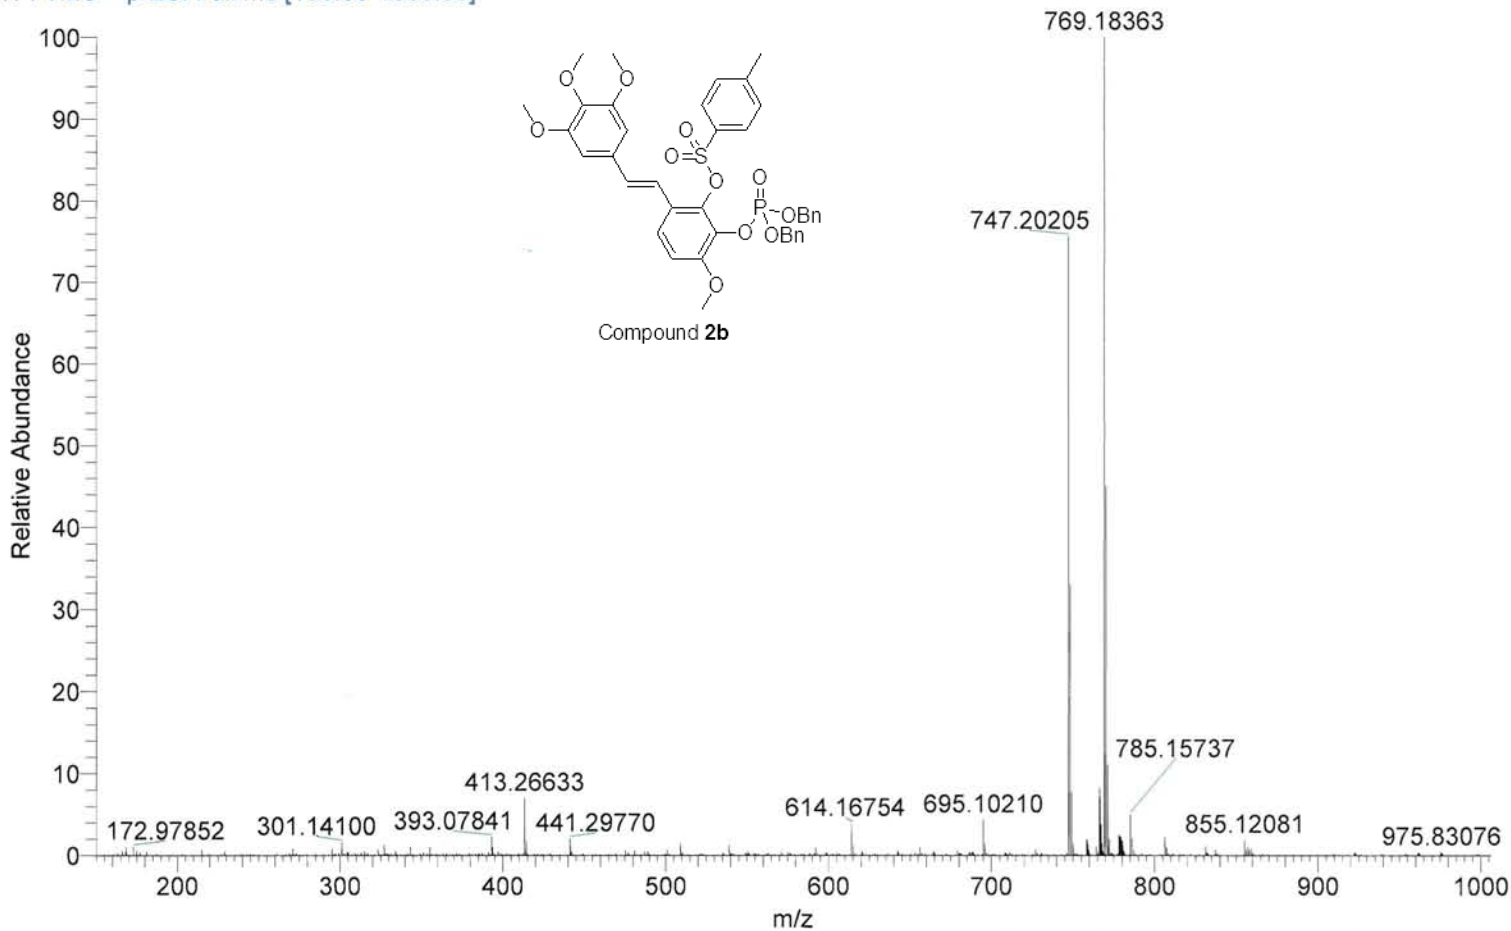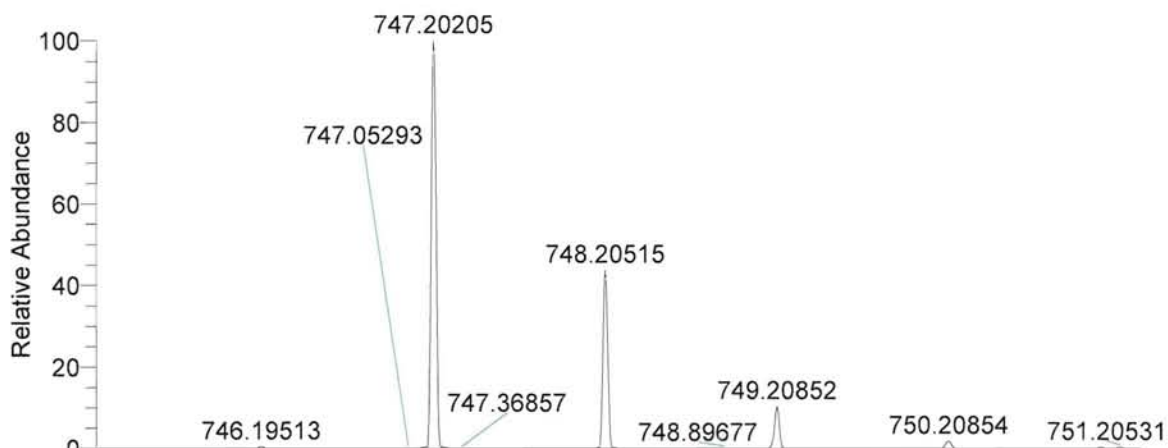

NL:  
2.12E7  
RT-4-103\_fs\_Orbi\_+ESI#1-20  
RT: 0.00-0.16 AV: 20 T:  
FTMS + p ESI Full ms  
[150.00-1000.00]

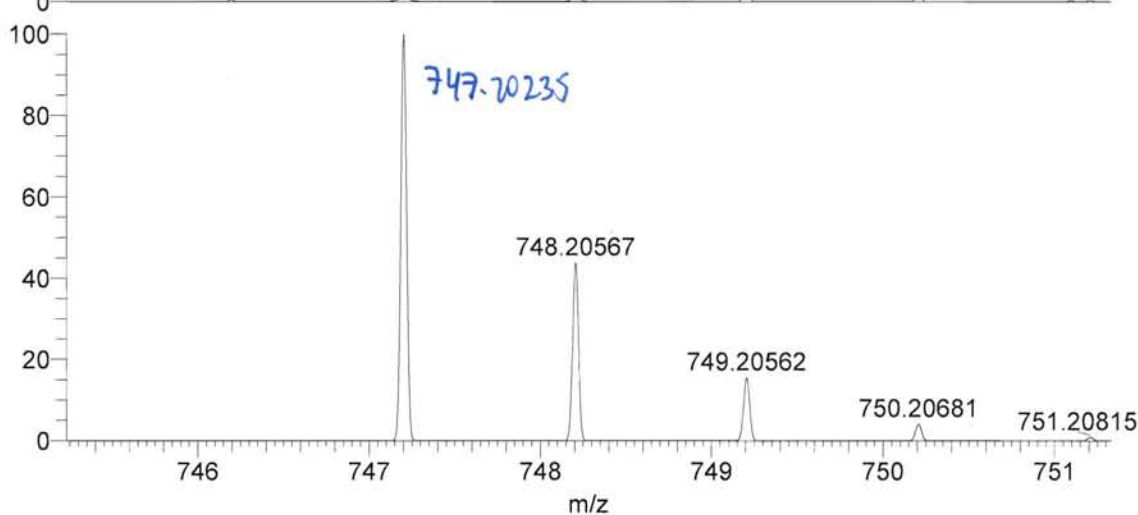

NL:  
1.42E4  
C<sub>39</sub> H<sub>39</sub> O<sub>11</sub> PS +H:  
C<sub>39</sub> H<sub>40</sub> O<sub>11</sub> P<sub>1</sub> S<sub>1</sub>  
p (gss, s /p:40) Chrg 1  
R: 20000 Res .Pwr . @FWHM

RT-5-13-2 (2)\_Orbi\_+ESI #20 RT: 0.18 AV: 1 NL: 2.03E6  
 T: FTMS + p ESI Full ms [50.00-700.00]

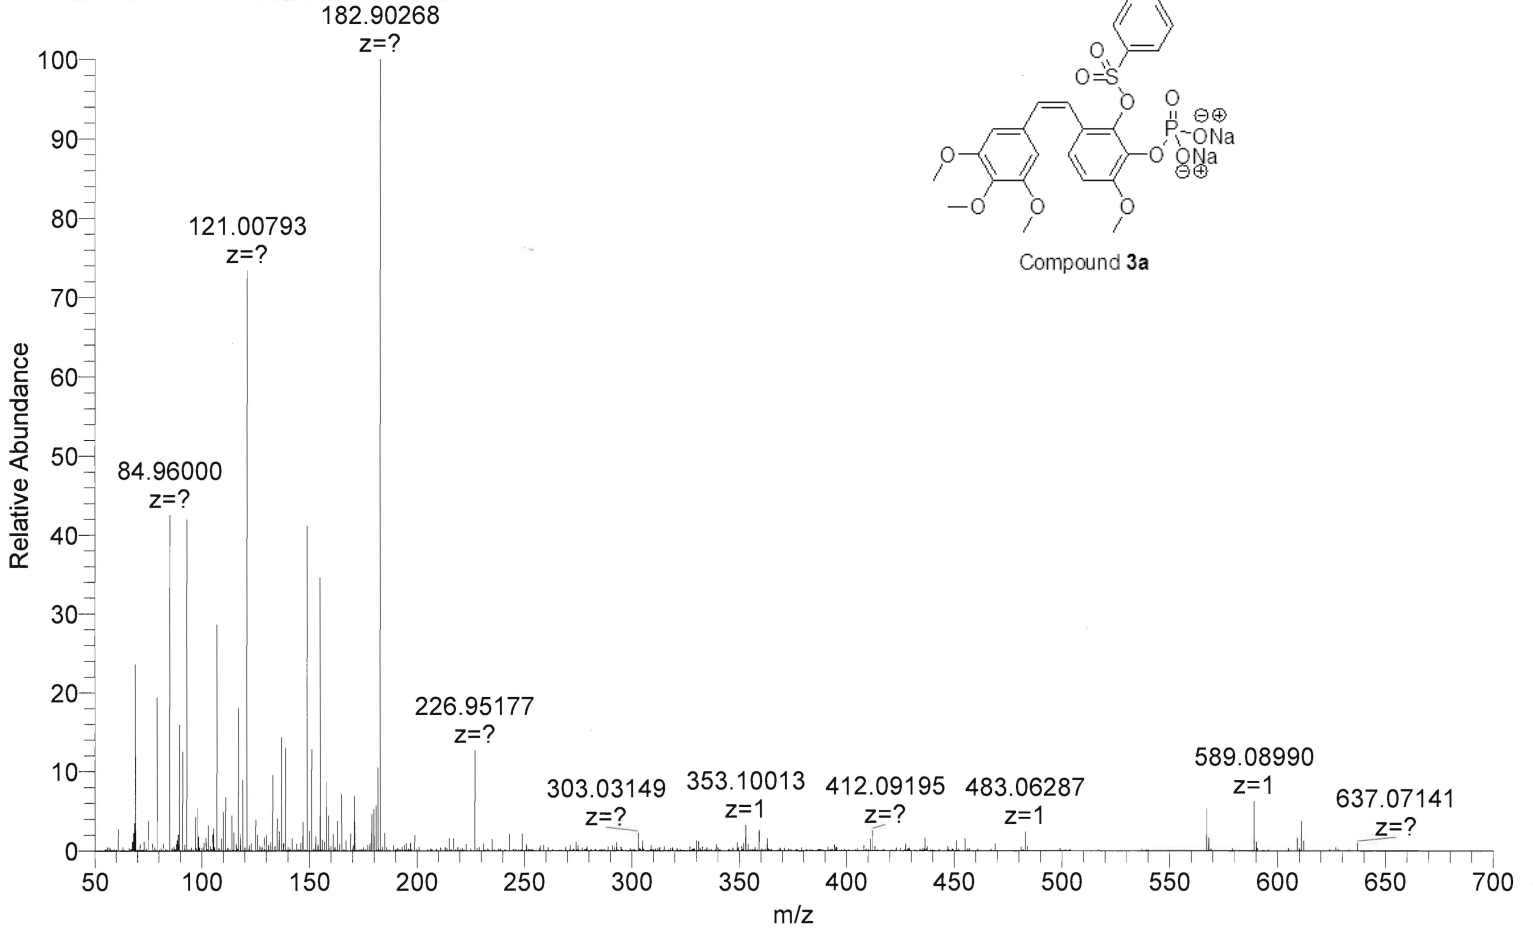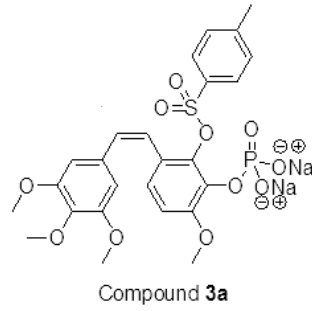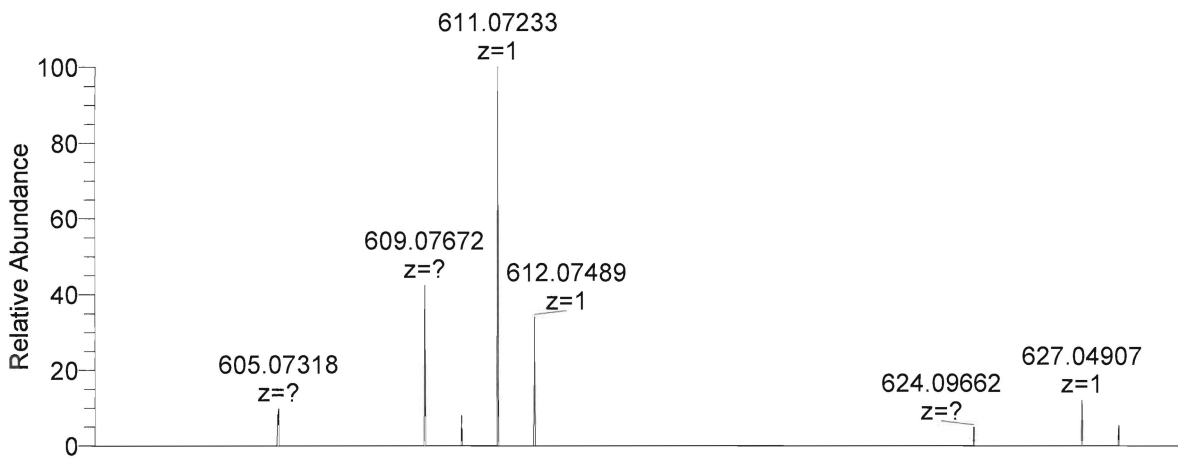

NL:  
 7.70E4  
 RT-5-13-2  
 (2)\_Orbi\_+ESI#20 RT:  
 0.18 AV: 1 T: FTMS + p  
 ESI Full ms  
 [50.00-700.00]

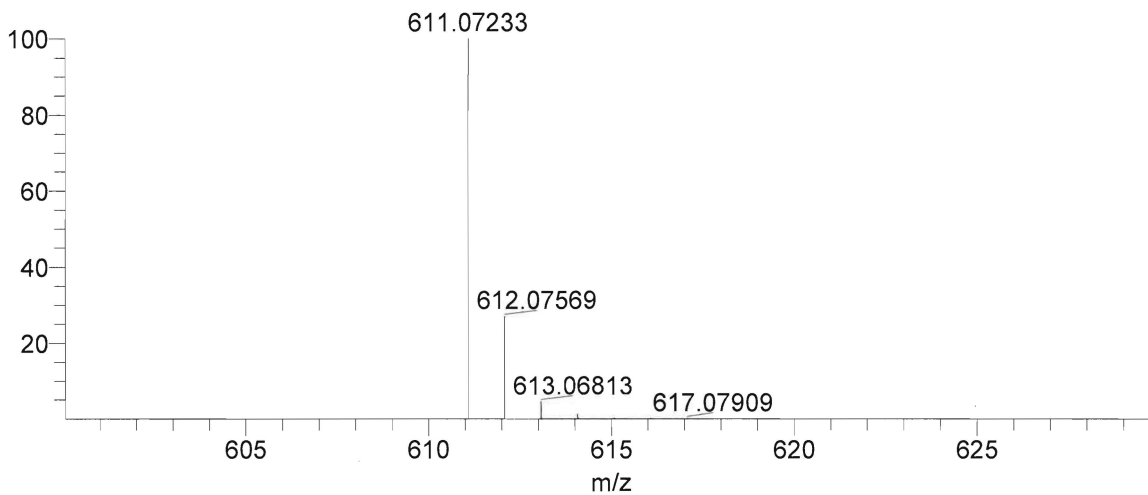

NL:  
 7.04E5  
 C<sub>25</sub> H<sub>25</sub> Na<sub>2</sub> O<sub>11</sub> PS +H:  
 C<sub>25</sub> H<sub>26</sub> Na<sub>2</sub> O<sub>11</sub> P<sub>1</sub> S<sub>1</sub>  
 pa Chr 1

RT-5-7\_Orbi\_+ESI #2-20 RT: 0.01-0.17 AV: 19 NL: 8.81E5  
 T: FTMS + p ESI Full ms [50.00-700.00]

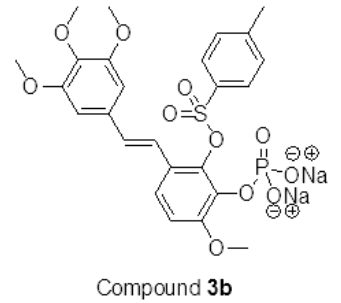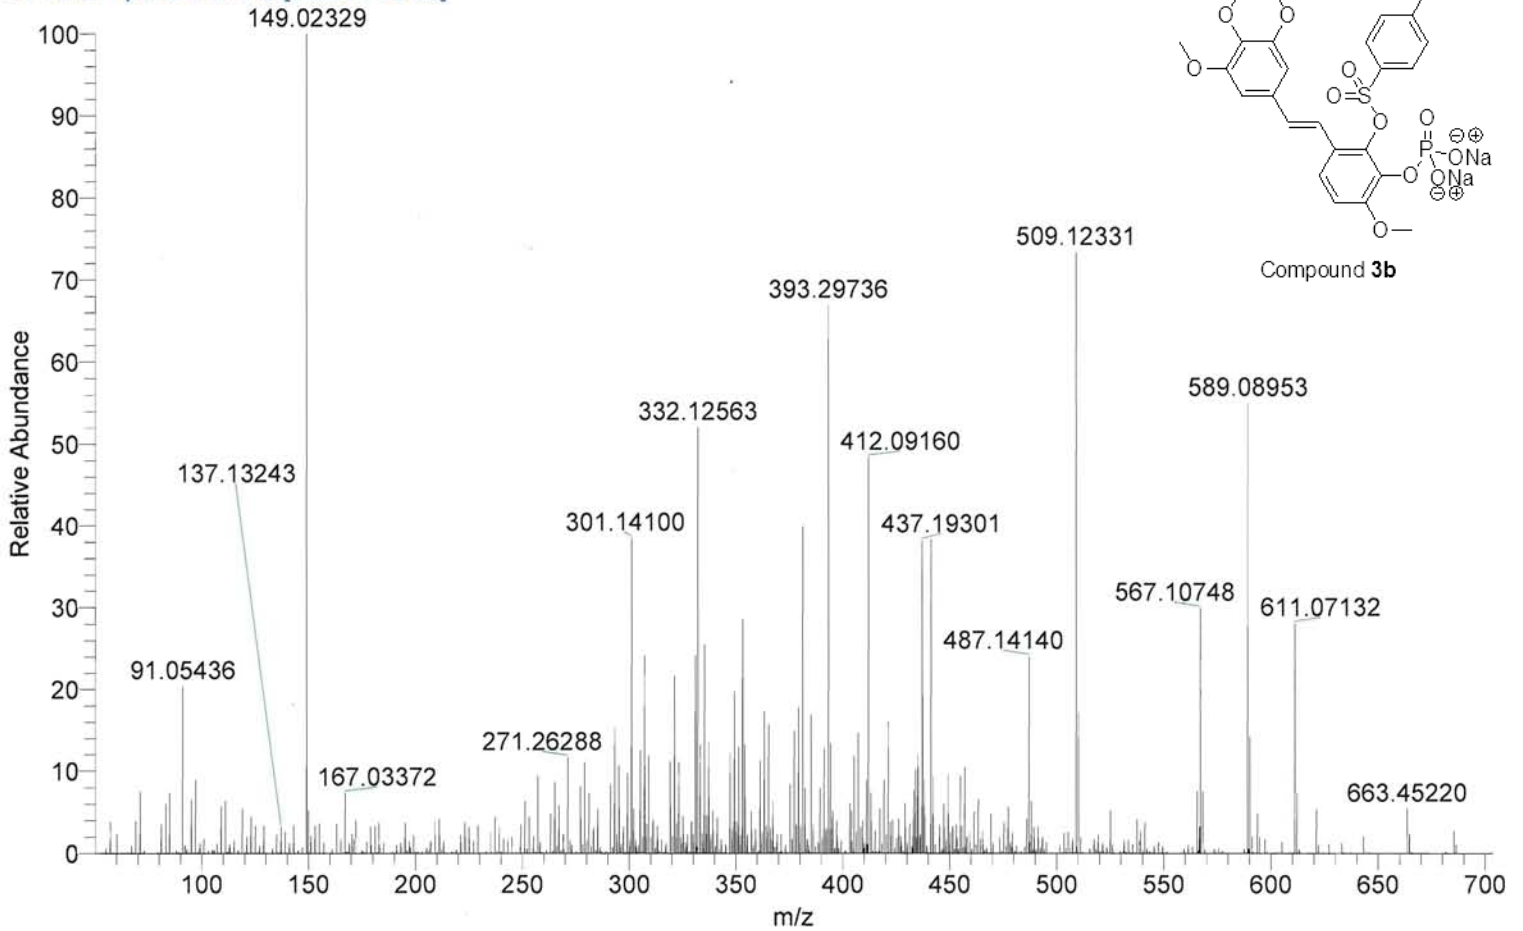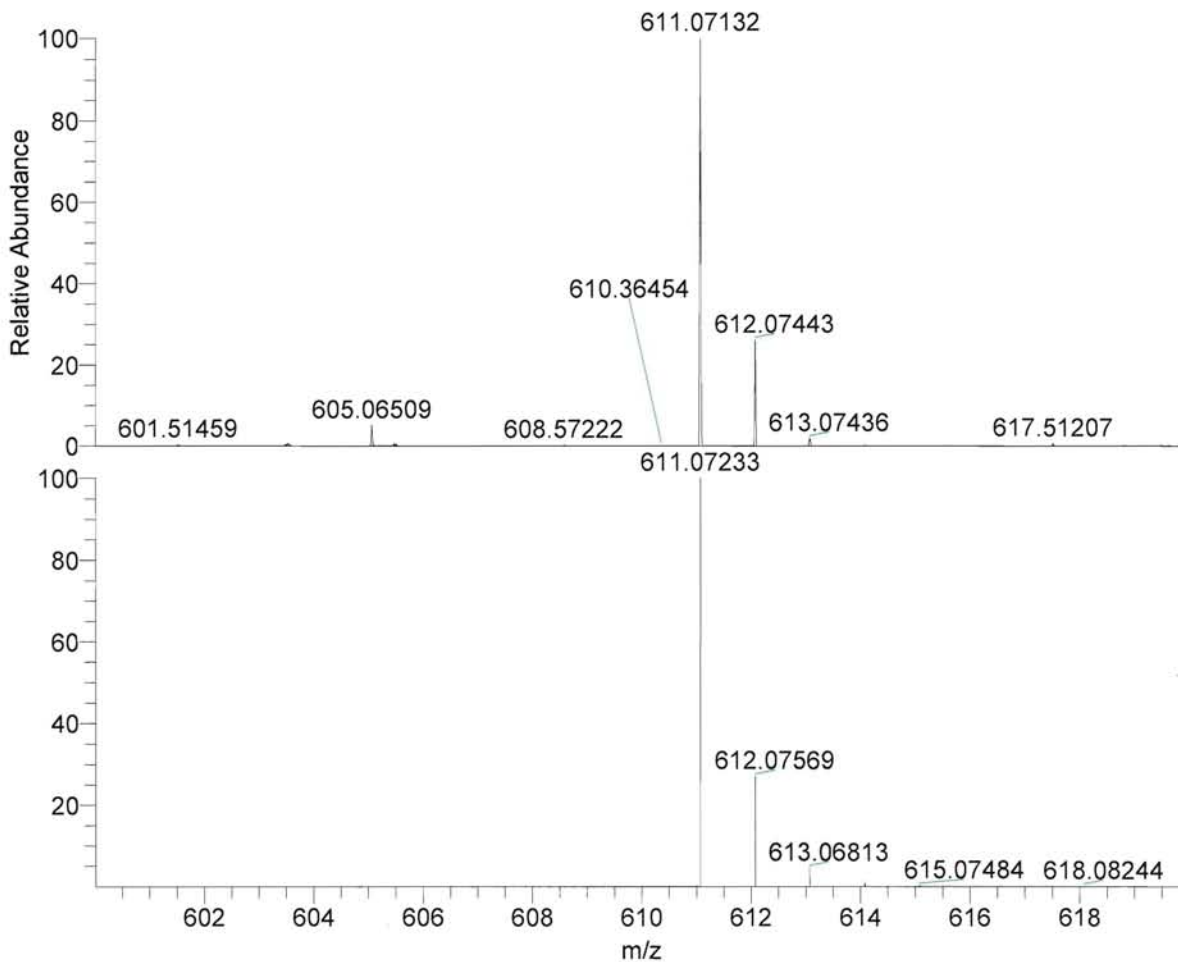

NL:  
 2.47E5  
 RT-5-7\_Orbi\_+ESI#2-20  
 RT: 0.01-0.17 AV: 19 T:  
 FTMS + p ESI Full ms  
 [50.00-700.00]

NL:  
 7.04E5  
 C<sub>25</sub> H<sub>25</sub> Na<sub>2</sub> O<sub>11</sub> PS +H:  
 C<sub>25</sub> H<sub>26</sub> Na<sub>2</sub> O<sub>11</sub> P<sub>1</sub> S<sub>1</sub>  
 pa Chrg 1

RT-5-44\_Orbi\_+ESI #1-19 RT: 0.01-0.16 AV: 19 NL: 5.04E6  
 T: FTMS + p ESI Full ms [50.00-500.00]

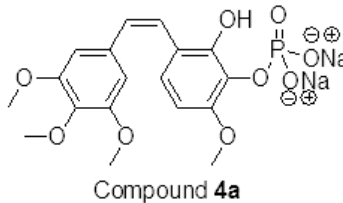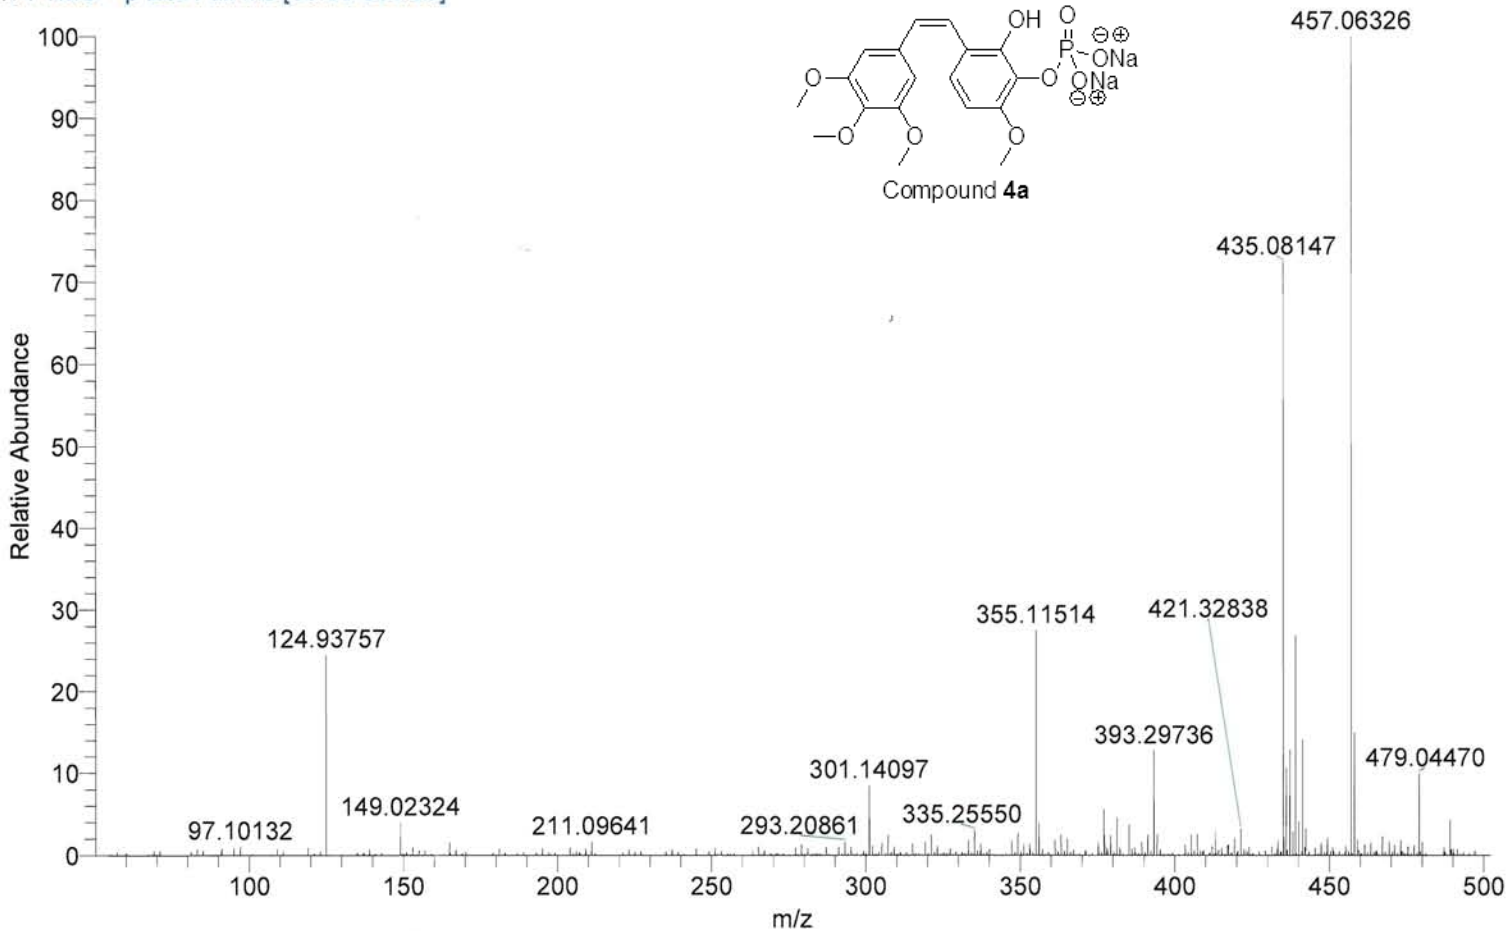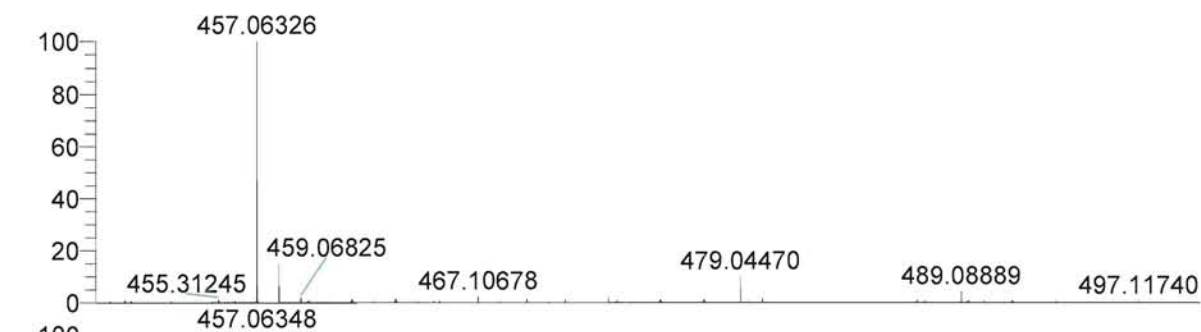

NL:  
 5.04E6  
 RT-5-44\_Orbi\_+  
 ESI#1-19 RT: 0.01-0.16  
 AV: 19 T: FTMS + p ESI  
 Full ms [50.00-500.00]

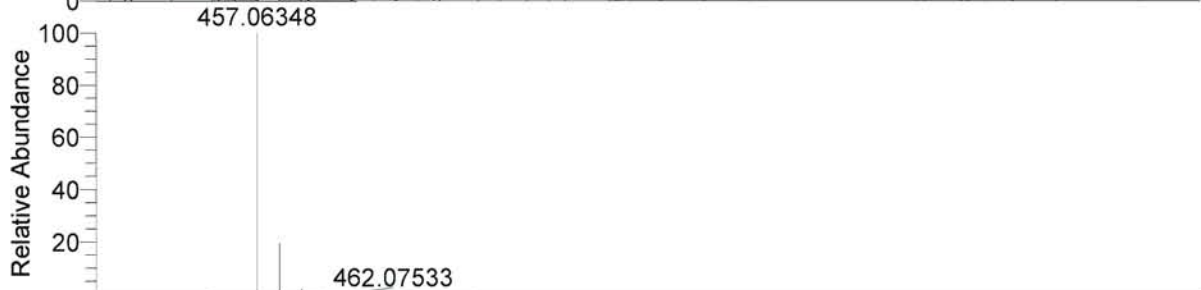

NL:  
 8.04E5  
 C<sub>18</sub> H<sub>19</sub> Na<sub>2</sub> O<sub>9</sub> P +H:  
 C<sub>18</sub> H<sub>20</sub> Na<sub>2</sub> O<sub>9</sub> P<sub>1</sub>  
 pa Chrg 1

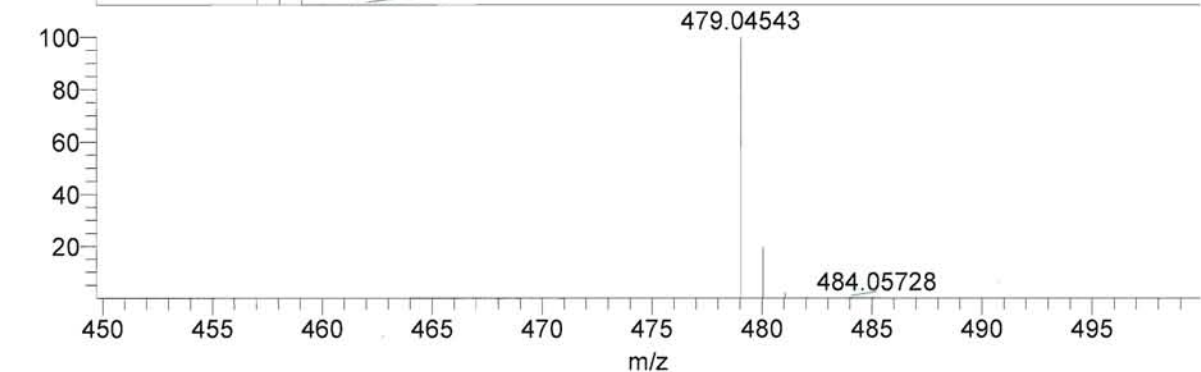

NL:  
 8.04E5  
 C<sub>18</sub> H<sub>19</sub> Na<sub>2</sub> O<sub>9</sub> P +Na:  
 C<sub>18</sub> H<sub>19</sub> Na<sub>3</sub> O<sub>9</sub> P<sub>1</sub>  
 pa Chrg 1

RT-5-21\_Orbi\_+ESI #1-19 RT: 0.01-0.16 AV: 19 NL: 1.92E6  
 T: FTMS + p ESI Full ms [50.00-500.00]

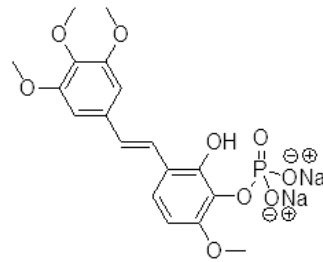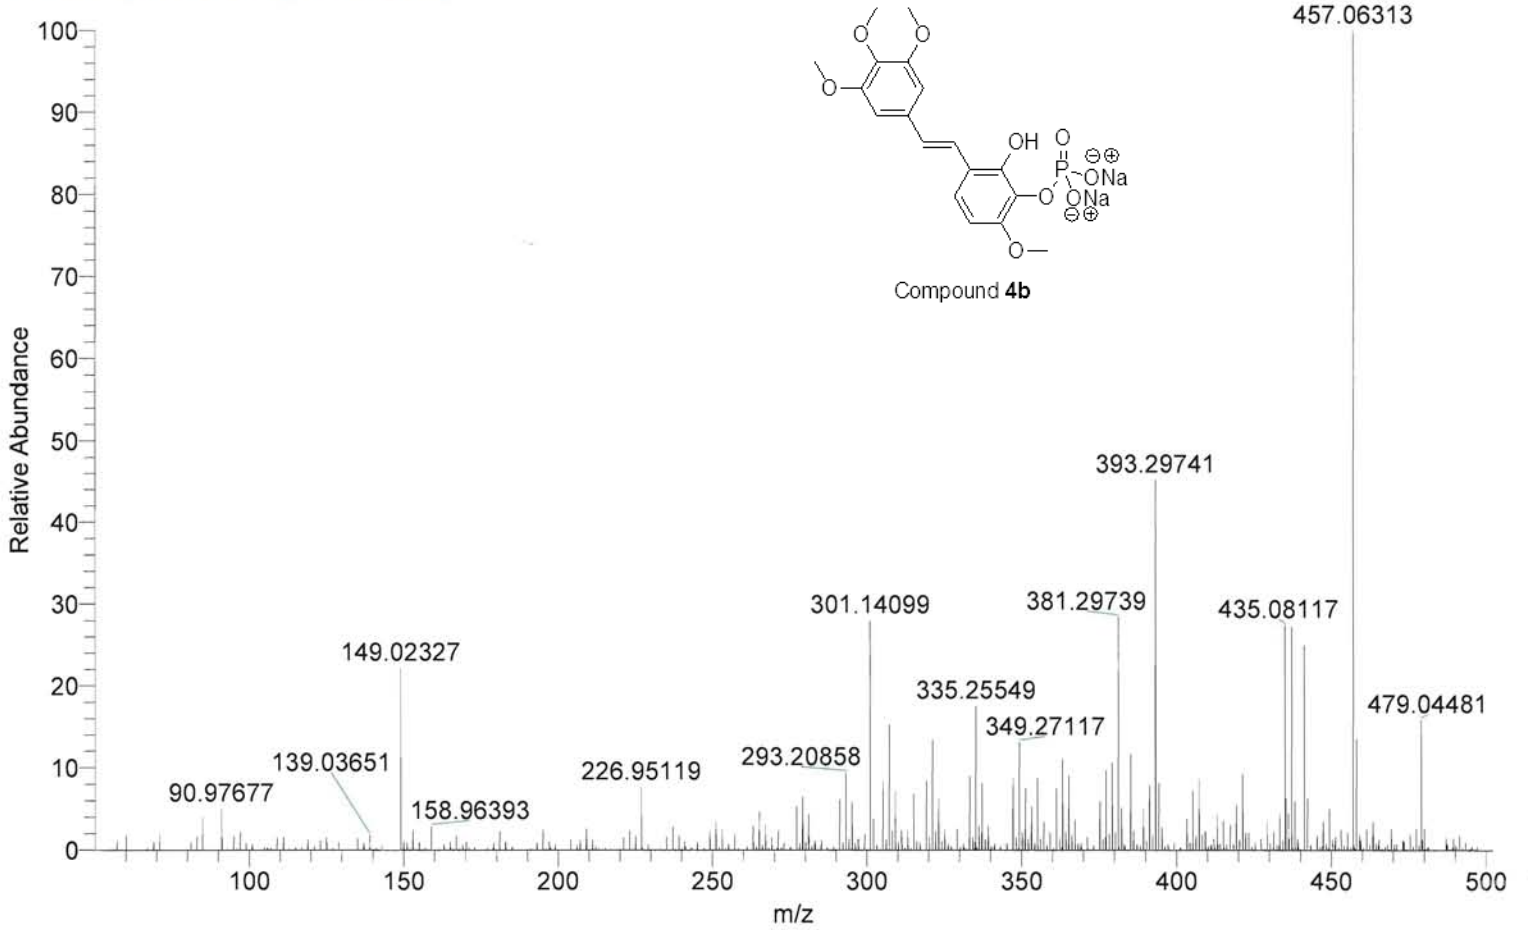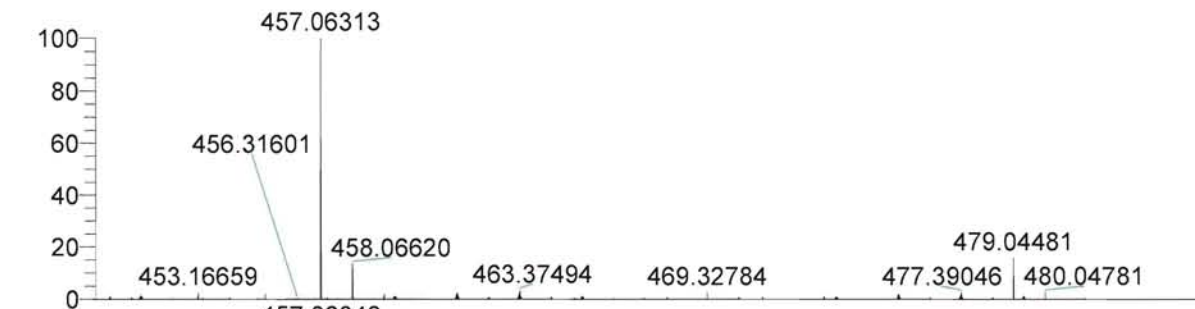

NL:  
 1.92E6  
 RT-5-21\_Orbi\_+  
 ESI#1-19 RT: 0.01-0.16  
 AV: 19 T: FTMS + p ESI  
 Full ms [50.00-500.00]

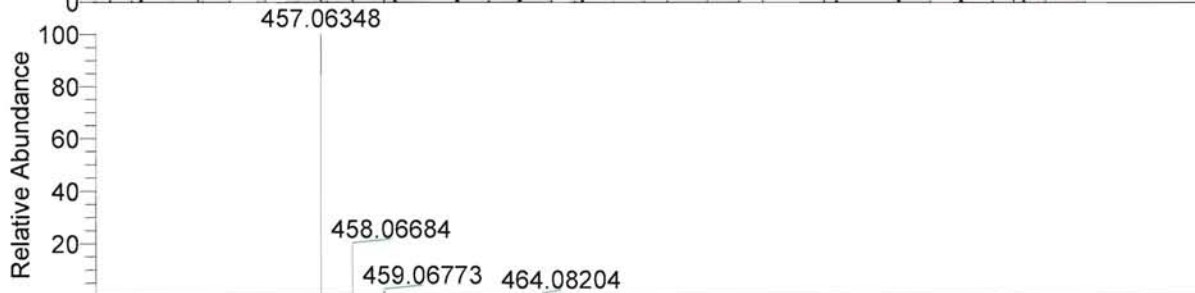

NL:  
 8.04E5  
 $C_{18}H_{19}Na_2O_9P + H$   
 $C_{18}H_{20}Na_2O_9P_1$   
 pa Chrg 1

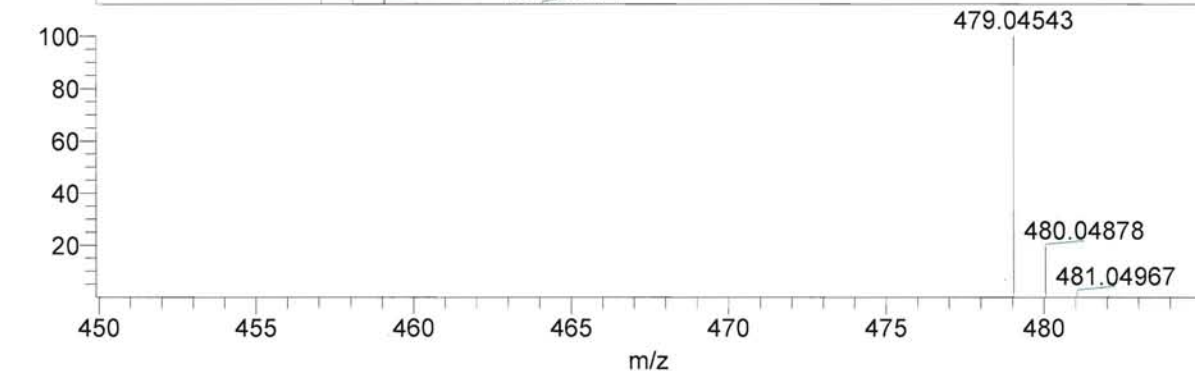

NL:  
 8.04E5  
 $C_{18}H_{19}Na_2O_9P + Na$   
 $C_{18}H_{19}Na_3O_9P_1$   
 pa Chrg 1



RT-5-2(1)\_fs\_Orbi\_+ESI #2-16 RT: 0.01-0.12 AV: 15 NL: 2.07E8  
 T: FTMS + p ESI Full ms [150.00-1000.00]

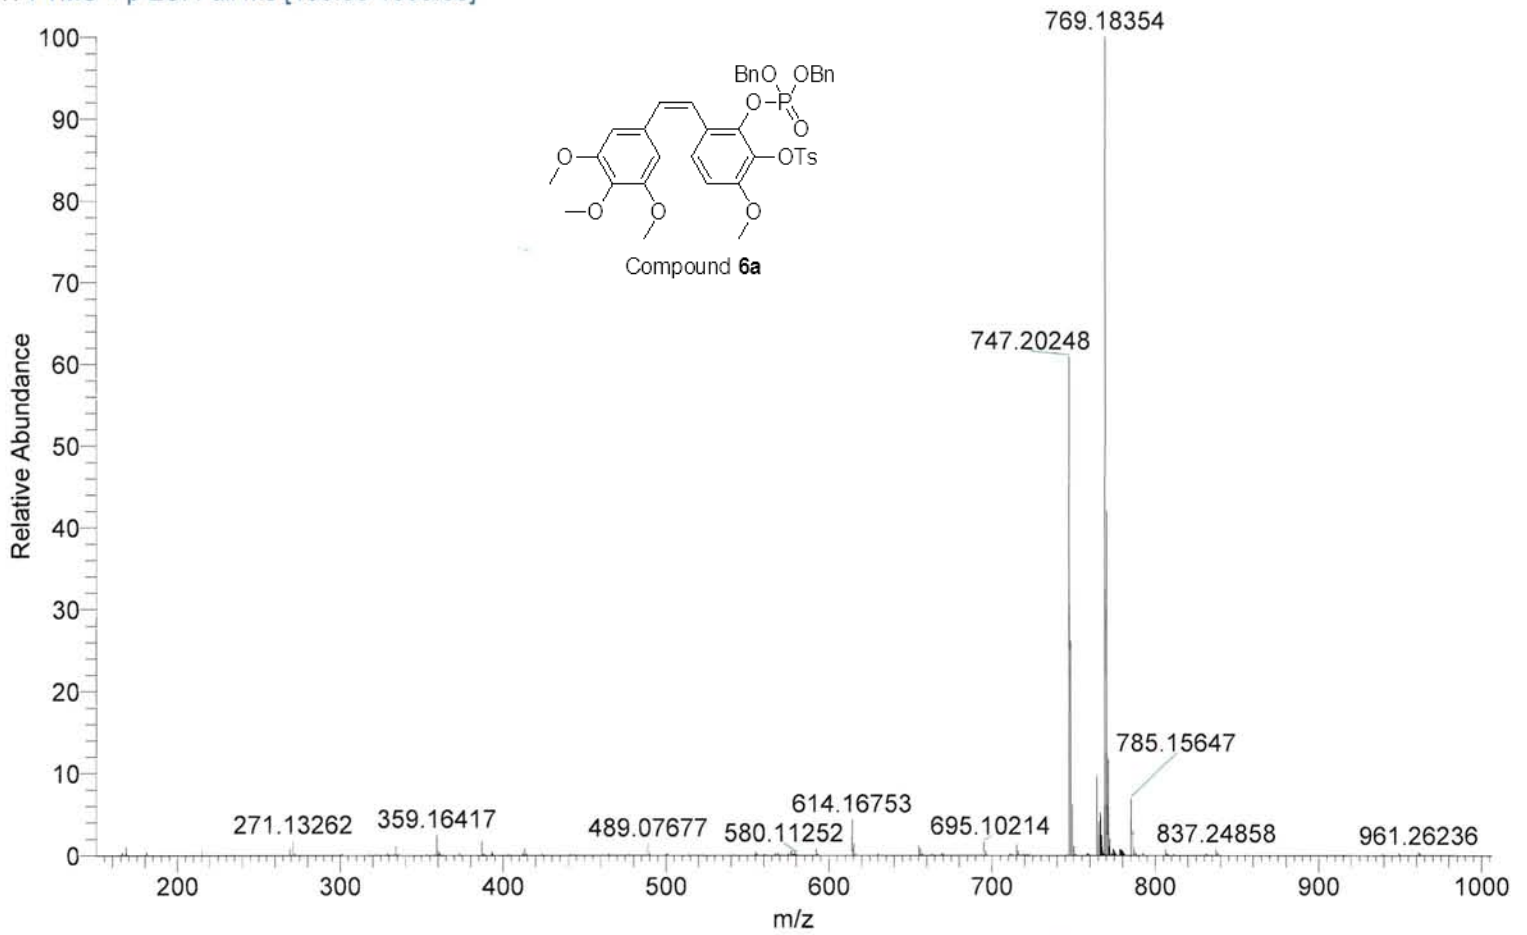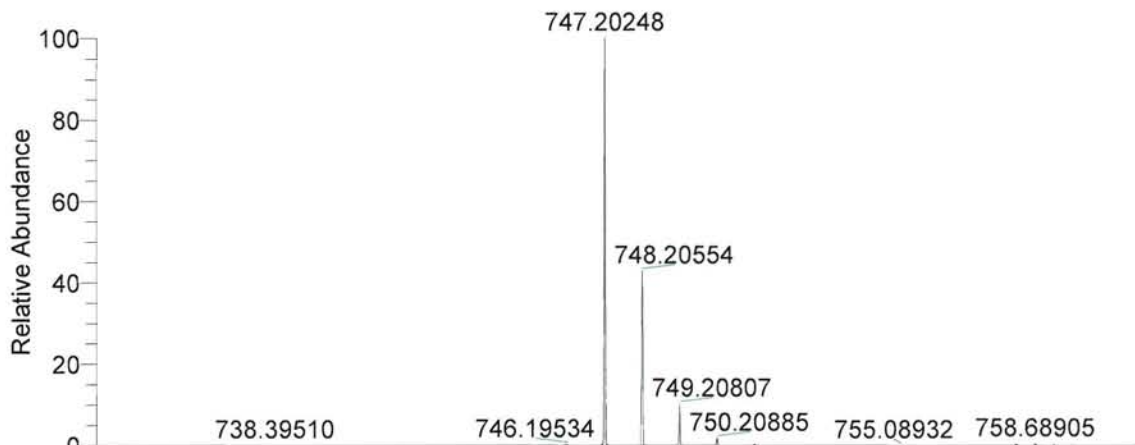

NL: 1.26E8  
 RT-5-2(1)\_fs\_Orbi\_+ESI#2-16  
 RT: 0.01-0.12 AV: 15 T:  
 FTMS + p ESI Full ms  
 [150.00-1000.00]

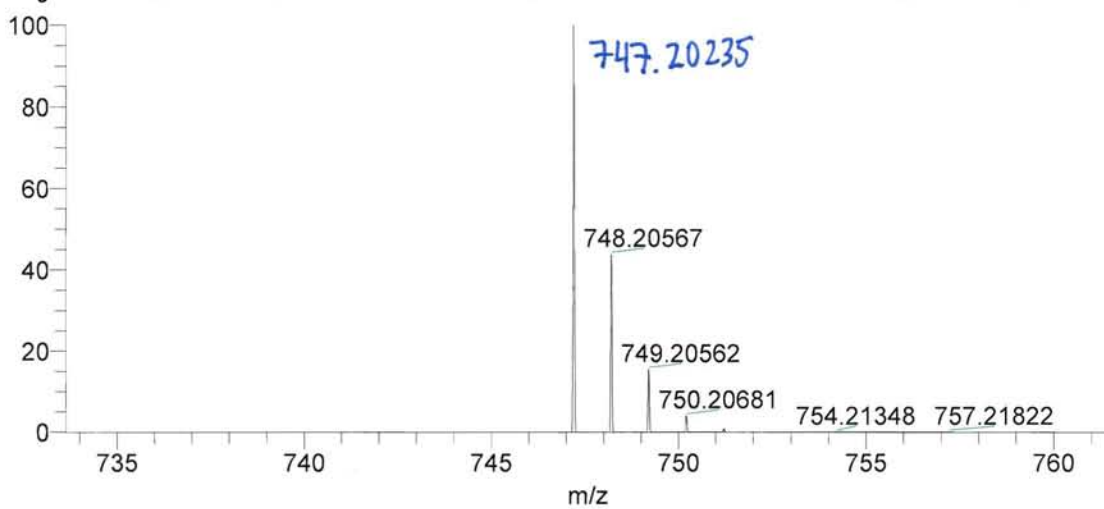

NL: 1.42E4  
 C<sub>39</sub> H<sub>39</sub> O<sub>11</sub> PS +H:  
 C<sub>39</sub> H<sub>40</sub> O<sub>11</sub> P<sub>1</sub> S<sub>1</sub>  
 p (gss, s /p:40) Chrg 1  
 R: 20000 Res .Pwr . @FWHM



RT-5-2(2)\_fs\_Orbi\_+ESI #1-13 RT: 0.00-0.10 AV: 13 NL: 6.30E7  
 T: FTMS + p ESI Full ms [150.00-1000.00]

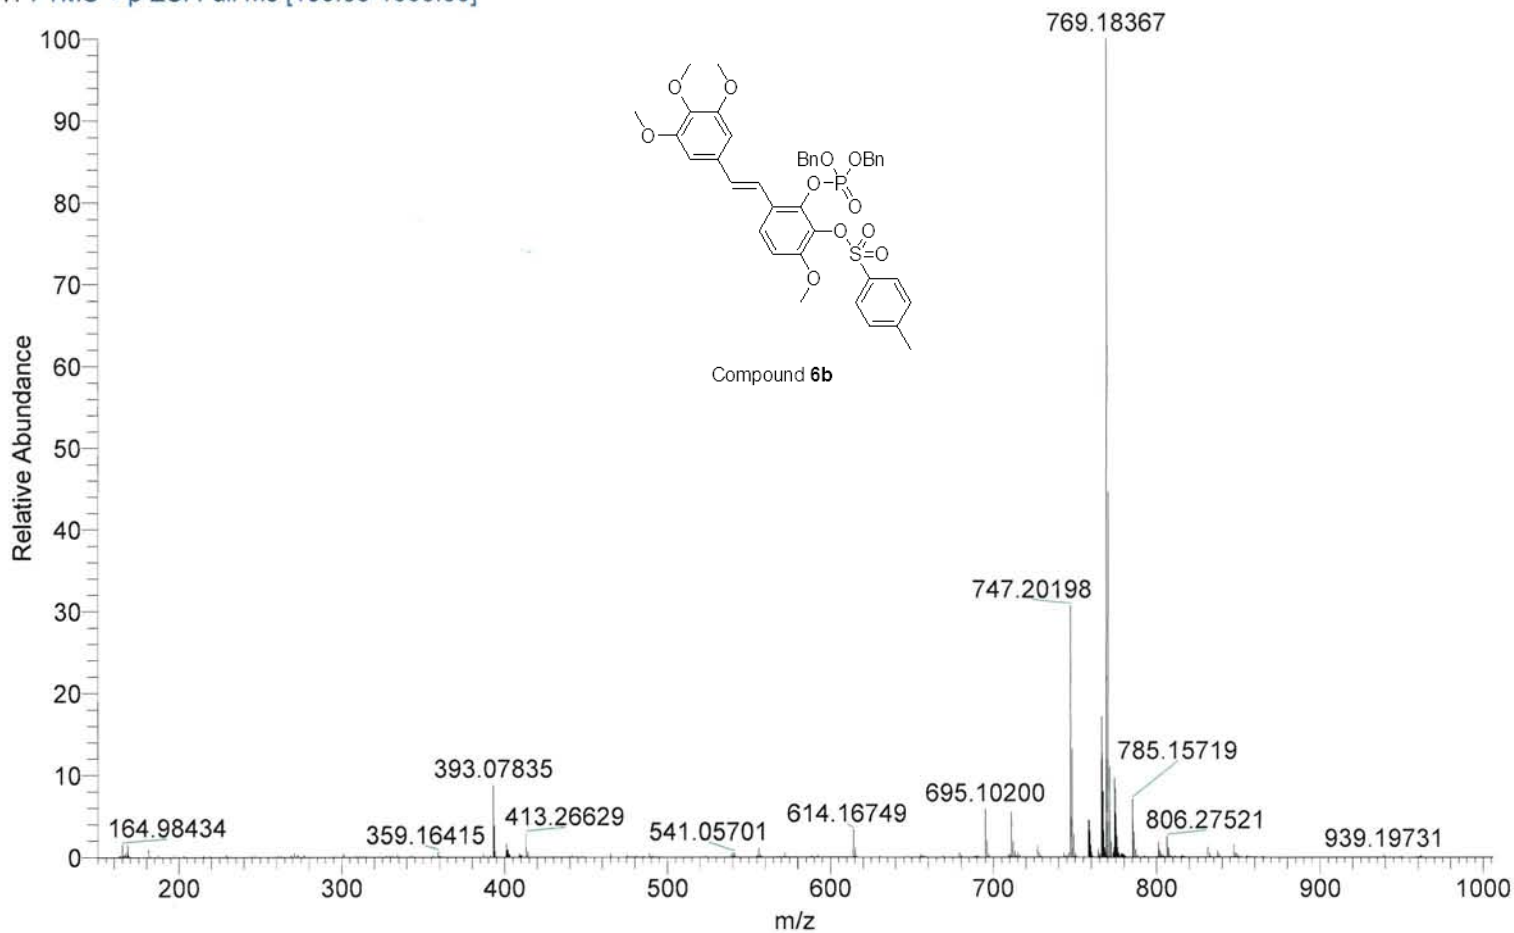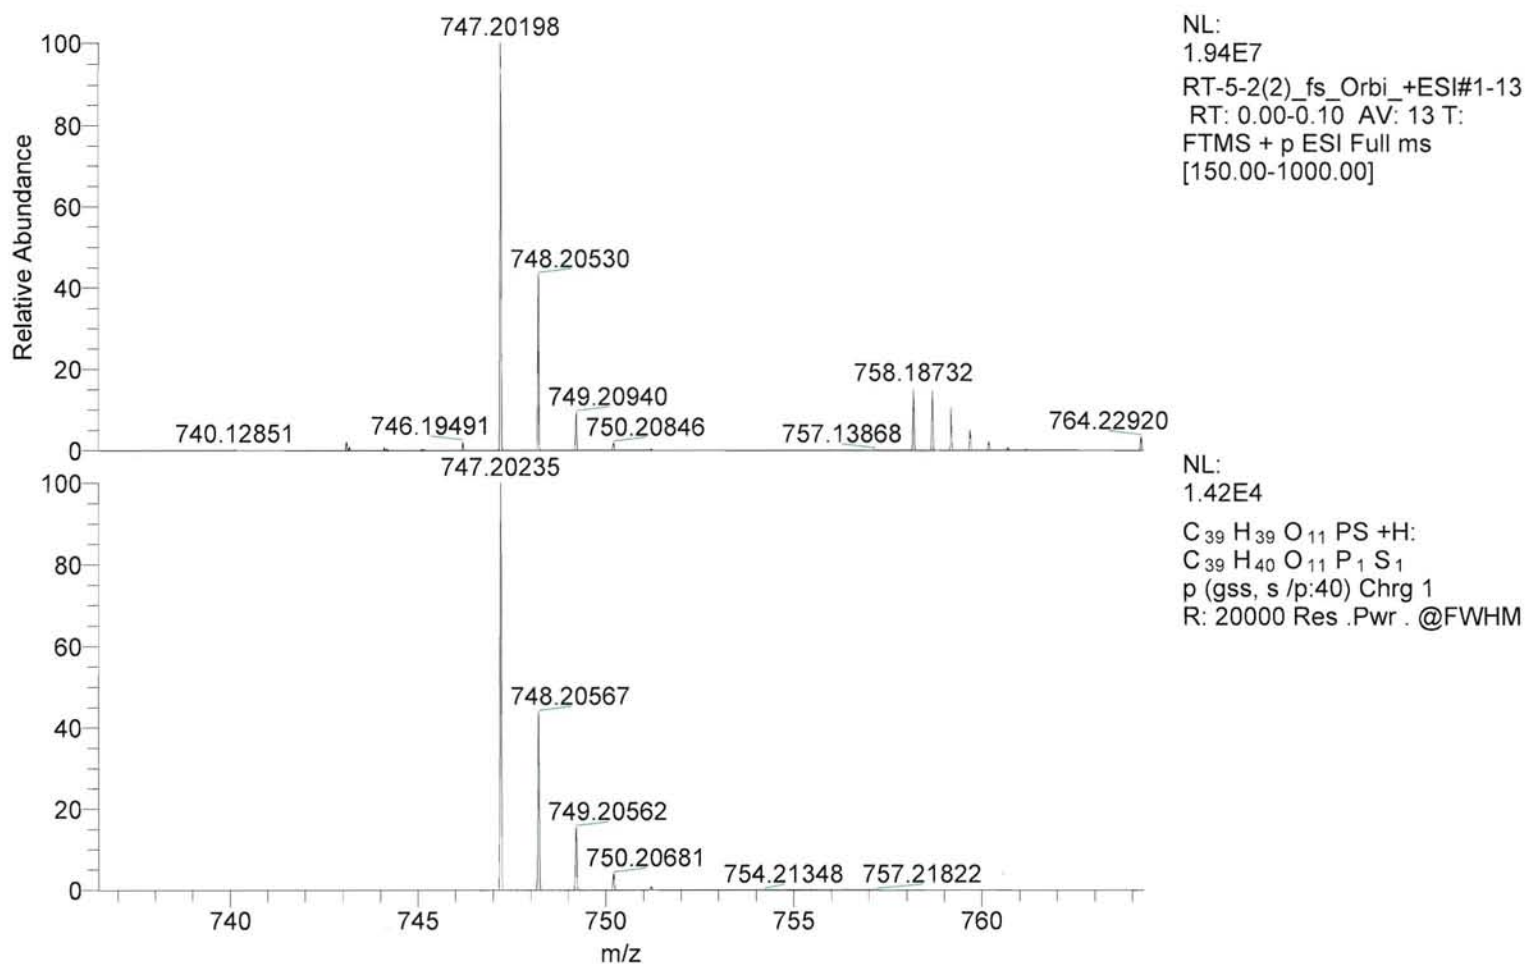

RT-5-9-2\_Orbi\_+ESI #1-20 RT: 0.00-0.17 AV: 20 NL: 1.75E6  
 T: FTMS + p ESI Full ms [50.00-700.00]

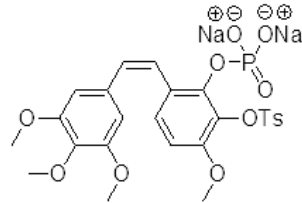

Compound 7a

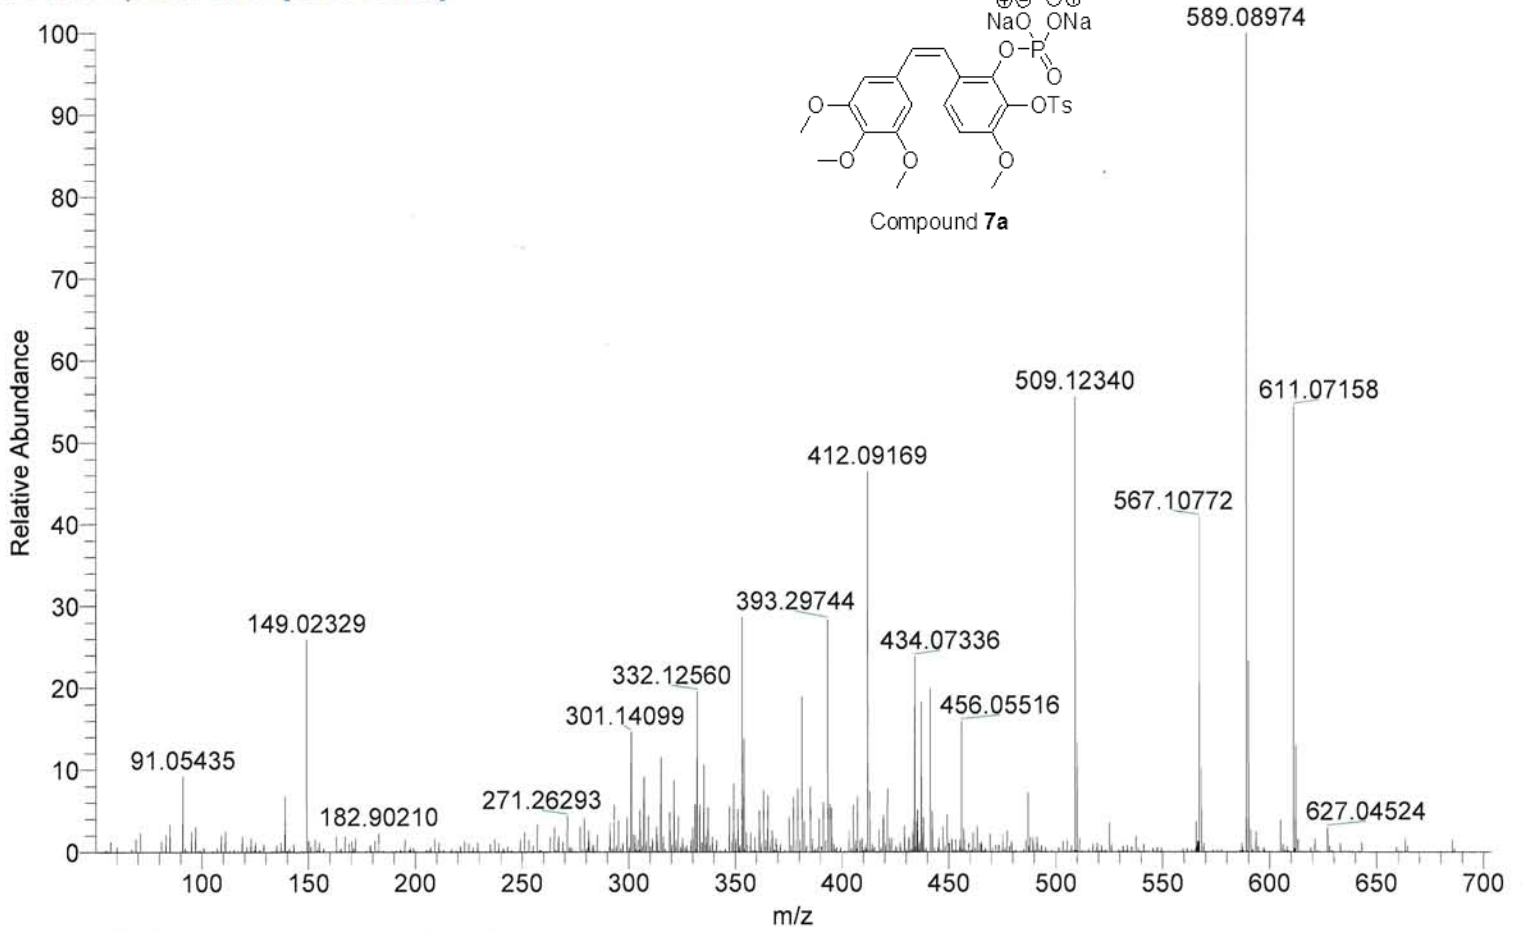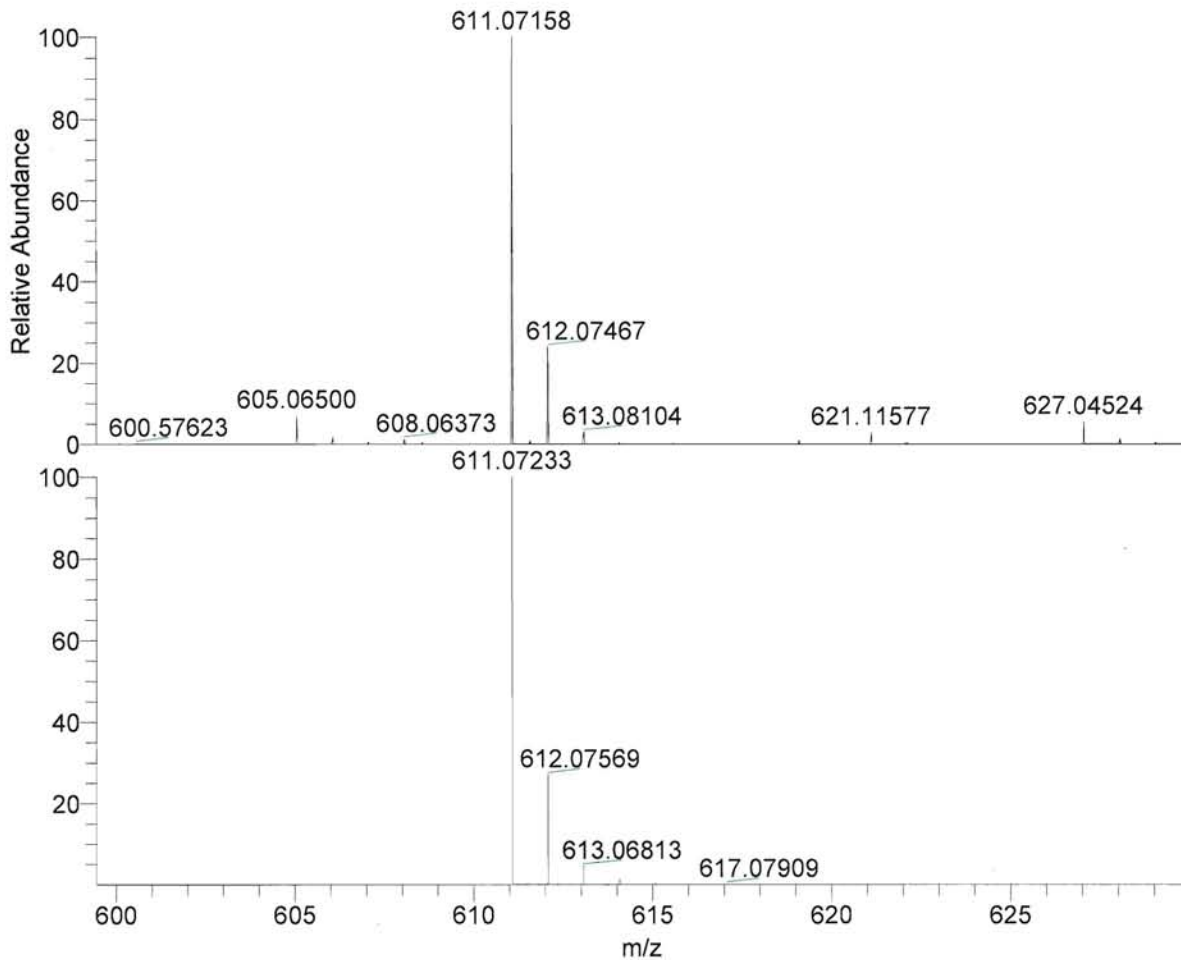

NL:  
 9.55E5  
 RT-5-9-2\_Orbi\_+  
 ESI#1-20 RT: 0.00-0.17  
 AV: 20 T: FTMS + p ESI  
 Full ms [50.00-700.00]

NL:  
 7.04E5  
 C<sub>25</sub> H<sub>25</sub> Na<sub>2</sub> O<sub>11</sub> PS +H:  
 C<sub>25</sub> H<sub>26</sub> Na<sub>2</sub> O<sub>11</sub> P<sub>1</sub> S<sub>1</sub>  
 pa Chrg 1

RT-5-8\_Orbi\_+ESI #1-20 RT: 0.00-0.17 AV: 20 NL: 3.86E6

T: FTMS + p ESI Full ms [50.00-700.00]

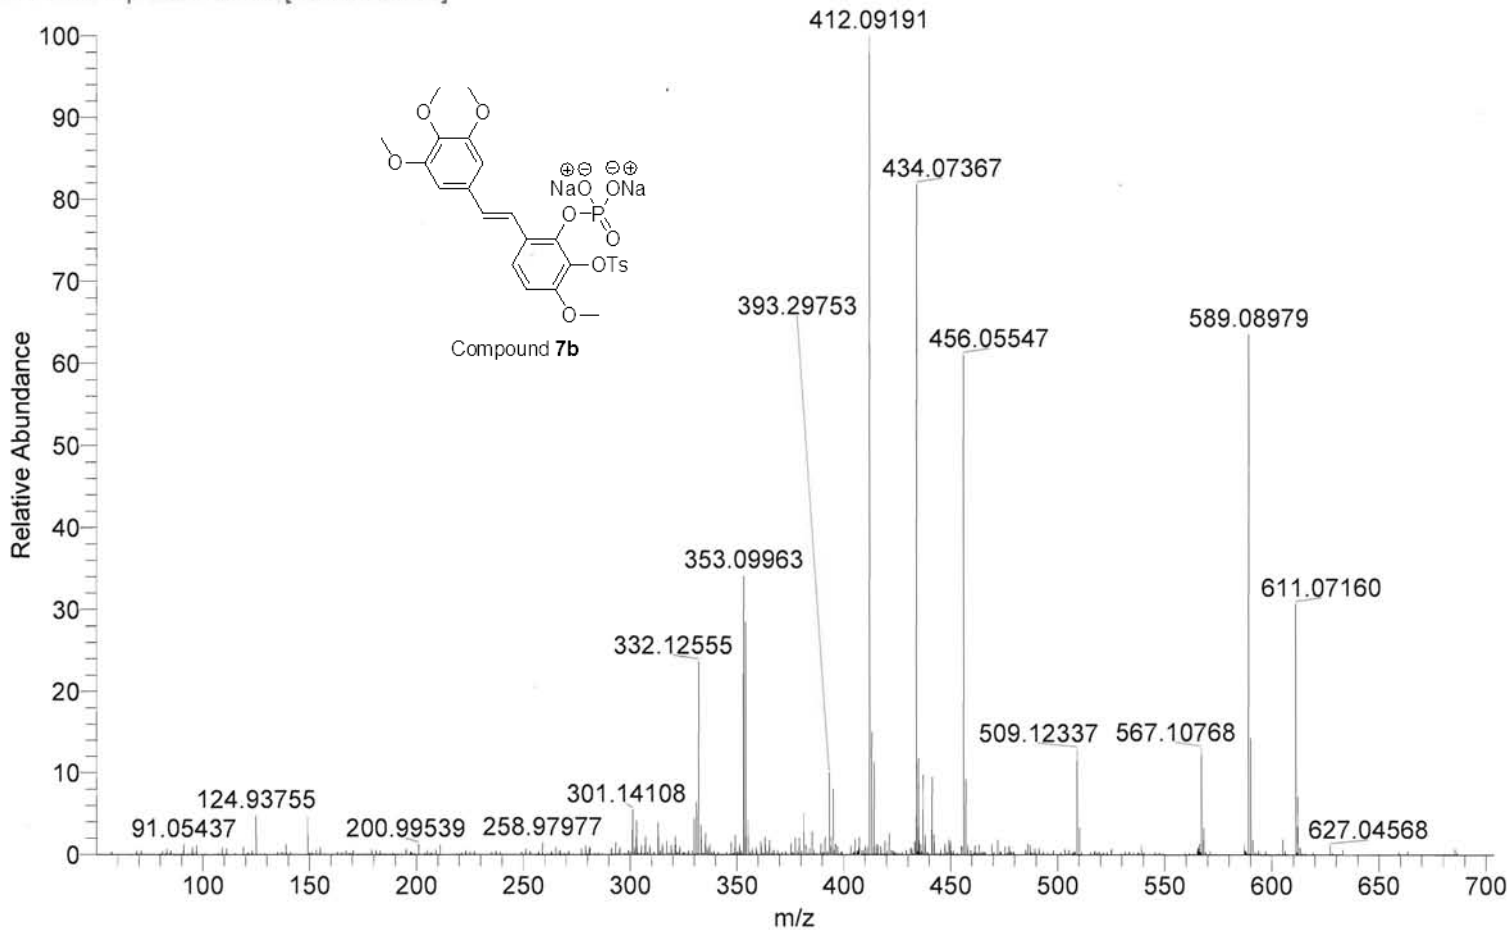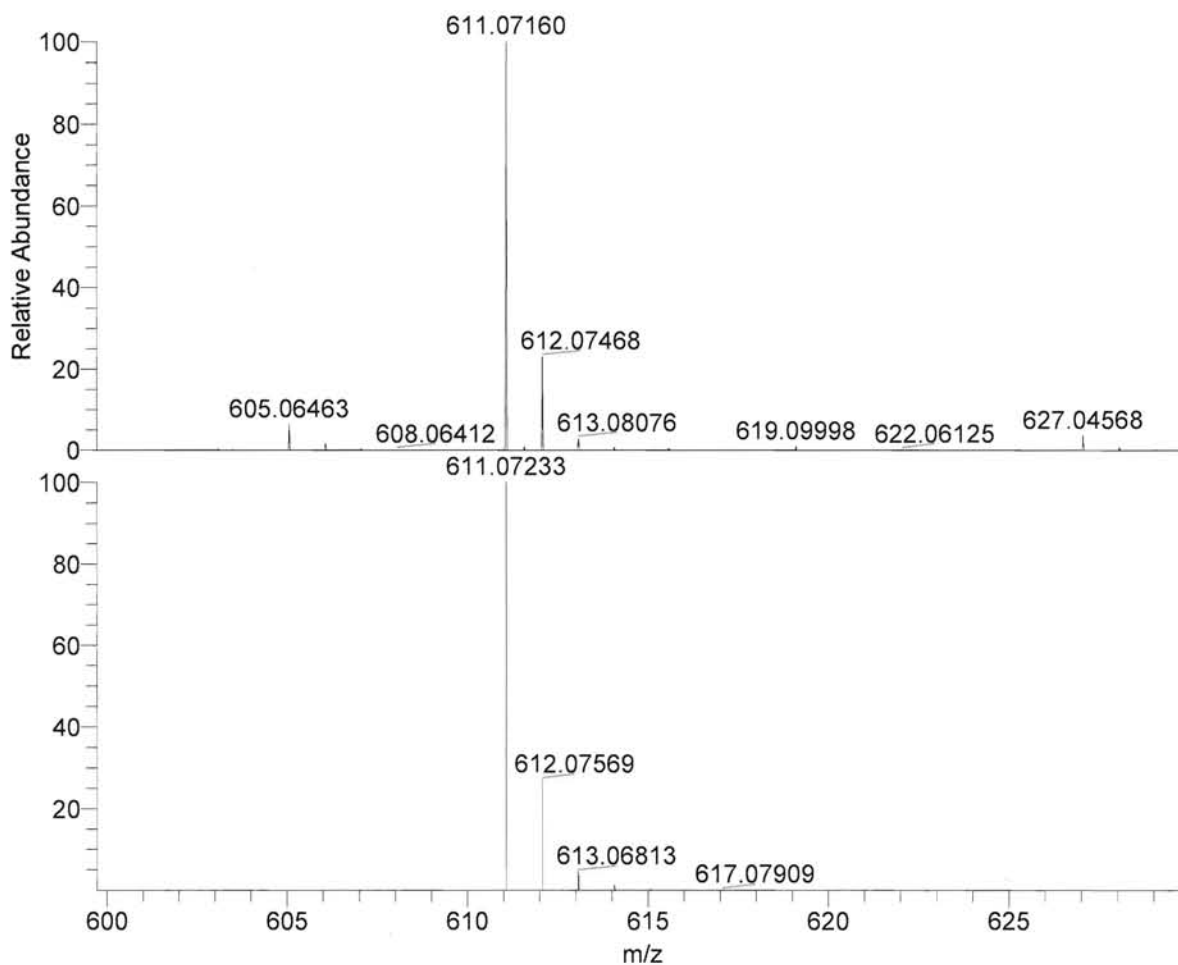

NL:  
1.18E6  
RT-5-8\_Orbi\_+ESI#1-20  
RT: 0.00-0.17 AV: 20 T:  
FTMS + p ESI Full ms  
[50.00-700.00]

NL:  
7.04E5  
C<sub>25</sub> H<sub>25</sub> Na<sub>2</sub> O<sub>11</sub> PS +H:  
C<sub>25</sub> H<sub>26</sub> Na<sub>2</sub> O<sub>11</sub> P<sub>1</sub> S<sub>1</sub>  
pa Chrg 1

RT-5-22\_Orbi\_+ESI #1-19 RT: 0.00-0.16 AV: 19 NL: 2.70E6  
 T: FTMS + p ESI Full ms [50.00-500.00]

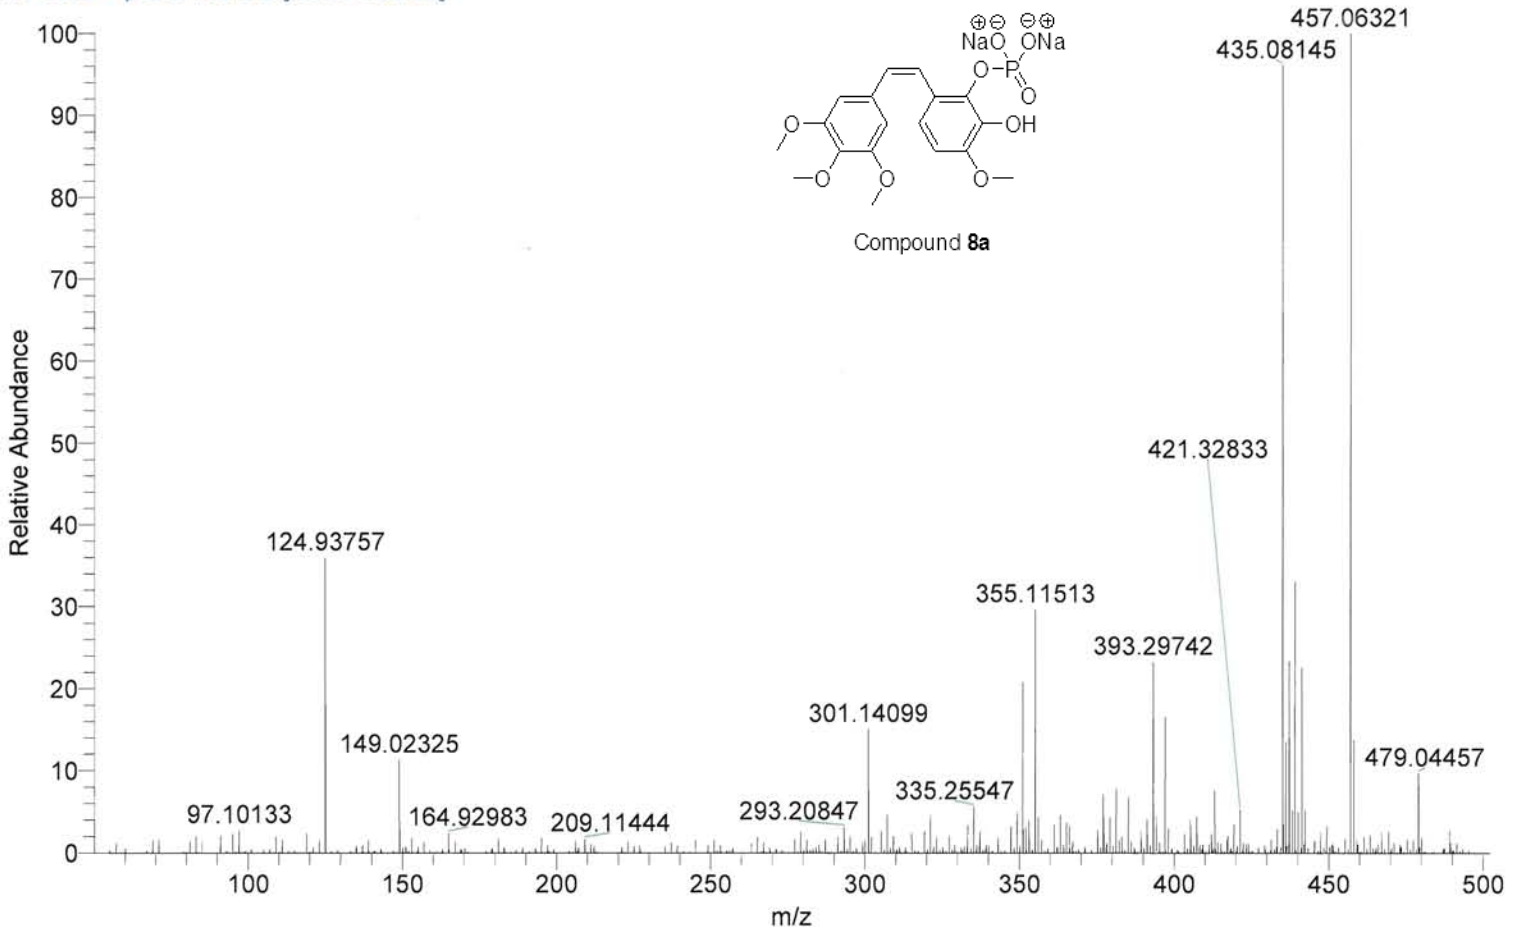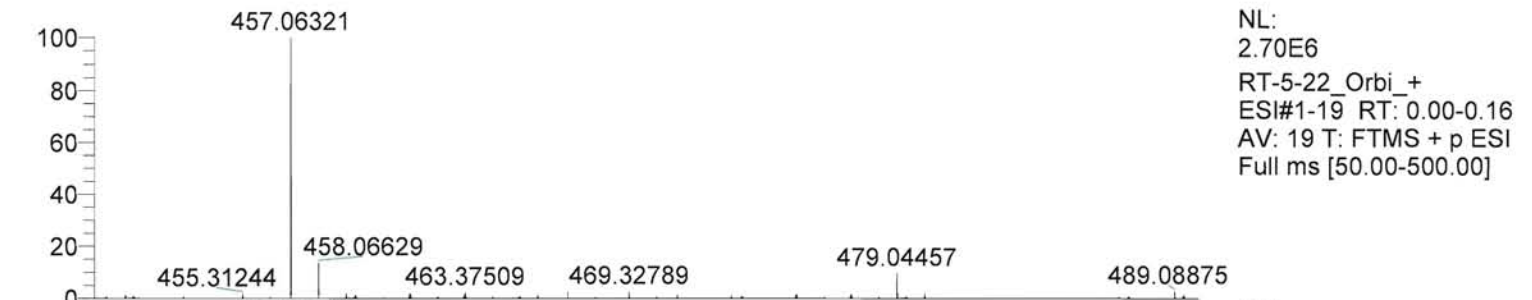

NL:  
 2.70E6  
 RT-5-22\_Orbi\_+  
 ESI#1-19 RT: 0.00-0.16  
 AV: 19 T: FTMS + p ESI  
 Full ms [50.00-500.00]

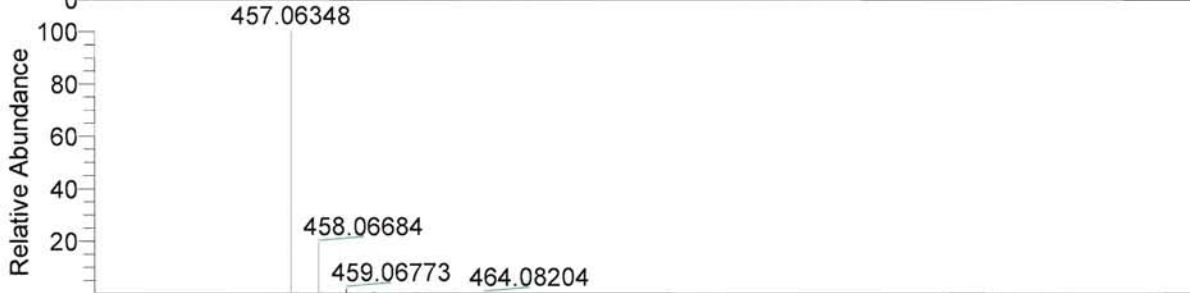

NL:  
 8.04E5  
 $C_{18}H_{19}Na_2O_9P+H$ :  
 $C_{18}H_{20}Na_2O_9P_1$   
 pa Chrg 1

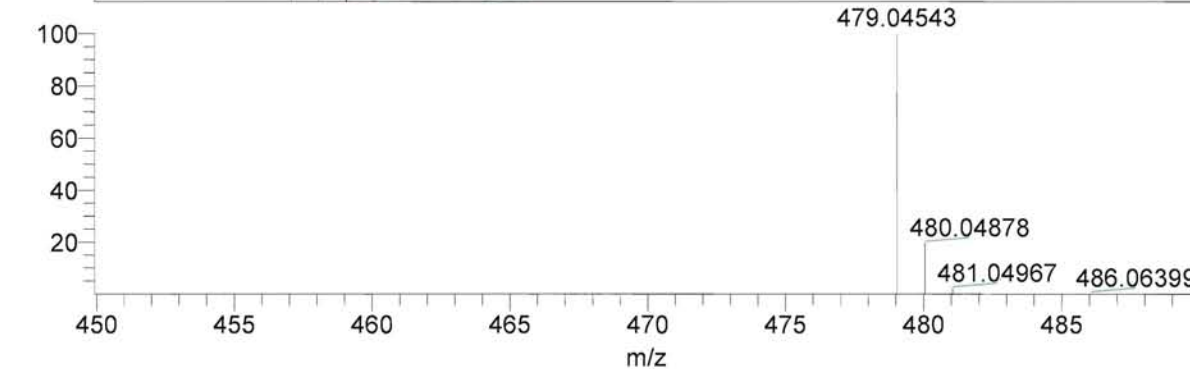

NL:  
 8.04E5  
 $C_{18}H_{19}Na_2O_9P+Na$ :  
 $C_{18}H_{19}Na_3O_9P_1$   
 pa Chrg 1

RT-5-20\_Orbi\_+ESI #1-19 RT: 0.00-0.17 AV: 19 NL: 2.89E6  
T: FTMS + p ESI Full ms [50.00-500.00]

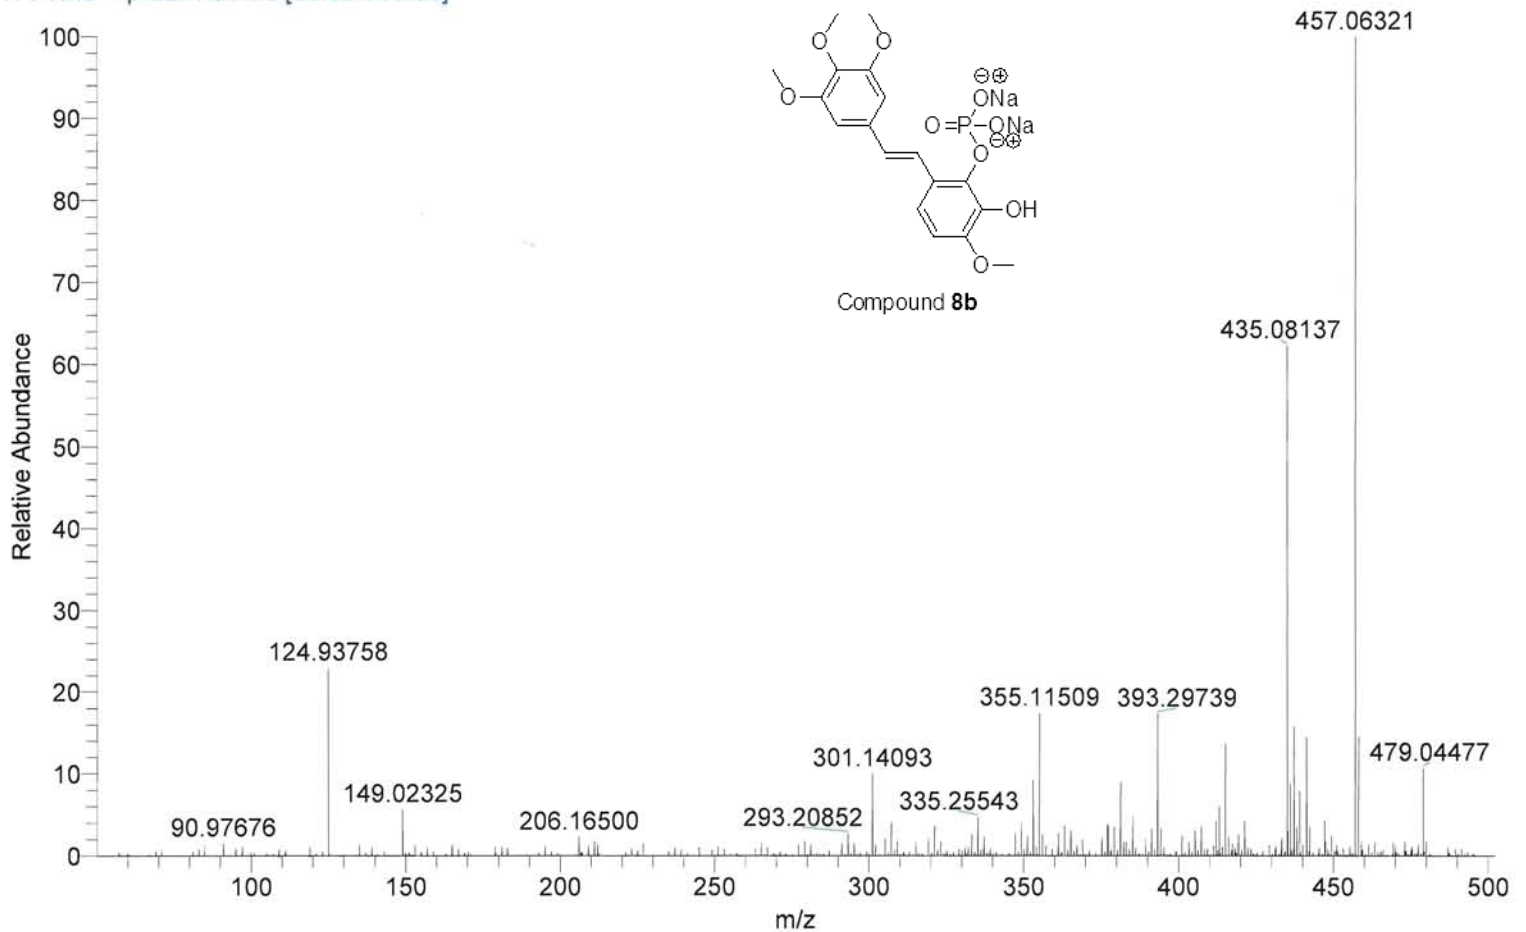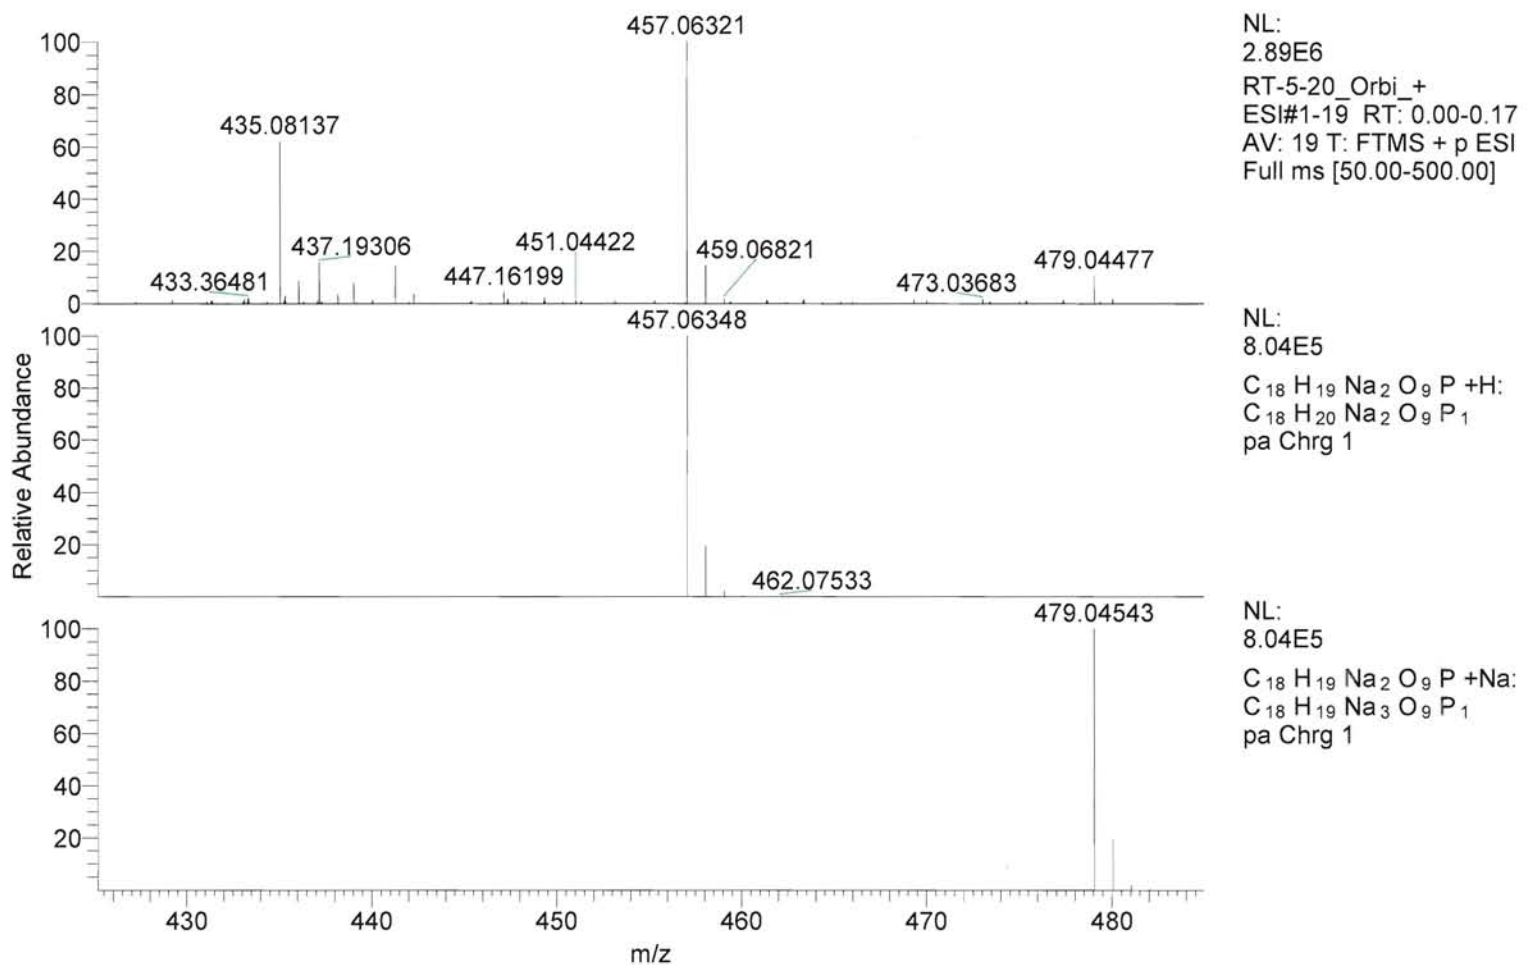

Supplement: NIHMS308673-supplement-1_si_001.pdf [file NIHMS308673-supplement-1_si_001.pdf]
