# Supplementary material
Source: PubMed Central journal article supplement (PMC3275140)
Supplement: NIHMS308673-supplement-2_si_002.pdf [file NIHMS308673-supplement-2_si_002.pdf]

## **Regioselective Synthesis of Water Soluble Monophosphate Derivatives of Combretastatin A-1**

Rajendra P. Tanpure<sup>†∇</sup>, Benson L. Nguyen<sup>†∇</sup>, Tracy E. Strecker<sup>†</sup>, Savannah Aguirre<sup>†</sup>, Suman Sharma<sup>‡</sup>, David J. Chaplin<sup>‡</sup>, Bronwyn G. Siim<sup>‡</sup>, Ernest Hamel<sup>§</sup>, John W. Lippert III<sup>⊥</sup>, George R. Pettit<sup>⊥</sup>, Mary Lynn Trawick<sup>†</sup>, and Kevin G. Pinney<sup>†\*</sup>

<sup>†</sup>Department of Chemistry and Biochemistry, Baylor University, One Bear Place #97348, Waco, Texas 76798-7348, USA

<sup>‡</sup>OXiGENE Inc., 701 Gateway Blvd., Suite 210, South San Francisco, CA 94080, USA

<sup>§</sup>Screening Technologies Branch, Developmental Therapeutics Program, Division of Cancer Treatment and Diagnosis, National Cancer Institute at Frederick, National Institutes of Health, Frederick, MD 21702, USA

<sup>⊥</sup>Albany Molecular Research Inc., Medicinal Chemistry, 26 Corporate Circle, PO Box 15098, Albany, NY 12212-5098, USA (current address)

<sup>⊥</sup>Cancer Research Institute and Department of Chemistry and Biochemistry, Arizona State University, P.O. Box 871604, Tempe, Arizona 85287-1604, USA

<sup>∇</sup>Authors with equal contributions.

## Table of Contents

|                                                                                                                     |                 |
|---------------------------------------------------------------------------------------------------------------------|-----------------|
| 1) Tubulin polymerization, Cell lines, and Sulforhodamine B (SRB) assay                                             | Pages S3'-S4'   |
| 2) $^1\text{H}$ NMR Spectra for compound <b>2a</b> , <b>2b</b> in $\text{CDCl}_3$                                   | Pages S5'-S6'   |
| 3) $^1\text{H}$ NMR Spectra for compounds <b>3a</b> , <b>3b</b> , <b>4a</b> , <b>4b</b> in $\text{D}_2\text{O}$     | Pages S7'-S10'  |
| 4) $^1\text{H}$ NMR Spectra for compound <b>6a</b> , <b>6b</b> in $\text{CDCl}_3$                                   | Pages S11'-S12' |
| 5) $^1\text{H}$ NMR Spectra for compounds <b>7a</b> , <b>7b</b> , <b>8a</b> , <b>8b</b> in $\text{D}_2\text{O}$     | Pages S13'-S16' |
| 6) $^{13}\text{C}$ NMR Spectra for compound <b>2a</b> , <b>2b</b> in $\text{CDCl}_3$                                | Pages S17'-S18' |
| 7) $^{13}\text{C}$ NMR Spectra for compounds <b>3a</b> , <b>3b</b> , <b>4a</b> , <b>4b</b> in $\text{D}_2\text{O}$  | Pages S19'-S22' |
| 8) $^{13}\text{C}$ NMR Spectra for compound <b>6a</b> , <b>6b</b> in $\text{CDCl}_3$                                | Pages S23'-S24' |
| 9) $^{13}\text{C}$ NMR Spectra for compounds <b>7a</b> , <b>7b</b> , <b>8a</b> , <b>8b</b> in $\text{D}_2\text{O}$  | Pages S25'-S28' |
| 10) $^{31}\text{P}$ NMR Spectrum for compounds <b>2b</b> in $\text{CDCl}_3$                                         | Page S29'       |
| 11) $^{31}\text{P}$ NMR Spectra for compounds <b>3a</b> , <b>3b</b> , <b>4a</b> , <b>4b</b> in $\text{D}_2\text{O}$ | Pages S30'-S33' |
| 12) $^{31}\text{P}$ NMR Spectrum for compounds <b>6b</b> in $\text{D}_2\text{O}$                                    | Page S34'       |
| 13) $^{31}\text{P}$ NMR Spectra for compounds <b>7b</b> , <b>8a</b> , <b>8b</b> in $\text{D}_2\text{O}$             | Pages S35'-S37' |
| 14) HSQC Spectra for compounds <b>2a</b> , <b>2b</b> in $\text{CDCl}_3$                                             | Pages S38'-S39' |
| 15) HSQC Spectra for compounds <b>3a</b> , <b>4a</b> , <b>4b</b> in $\text{D}_2\text{O}$                            | Pages S40'-S42' |
| 16) HSQC Spectra for compounds <b>6a</b> , <b>6b</b> in $\text{CDCl}_3$                                             | Pages S43'-S44' |
| 17) HSQC Spectra for compounds <b>7a</b> , <b>7b</b> , <b>8a</b> , <b>8b</b> in $\text{D}_2\text{O}$                | Pages S45'-S48' |
| 18) HMBC Spectra for compounds <b>2a</b> , <b>2b</b> in $\text{CDCl}_3$                                             | Pages S49'-S50' |
| 19) HMBC Spectra for compounds <b>3a</b> , <b>3b</b> , <b>4a</b> , <b>4b</b> in $\text{D}_2\text{O}$                | Pages S51'-S54' |
| 20) HMBC Spectra for compounds <b>6a</b> , <b>6b</b> in $\text{CDCl}_3$                                             | Pages S55'-S56' |

21) HMBC Spectra for compounds **7a,7b, 8a, 8b** in D<sub>2</sub>O      Pages S57'-S60'

22) Tables **S1** and **S2** for NMR Spectroscopic data for      Page S61'  
compounds **4a, 4b, 8a, and 8b**.

**Biology. Effects on Tubulin Polymerization.** Bovine brain tubulin was purified as described previously.<sup>S1</sup> To evaluate the effect of the compounds on tubulin assembly in vitro, an appropriate series of concentrations were preincubated with 10  $\mu$ M tubulin (1.0 mg/mL) in glutamate buffer at 30 °C and then cooled to 0 °C. After the addition of GTP, the mixtures were transferred to 0 °C cuvettes in a recording spectrophotometer and warmed to 30 °C, and the assembly of tubulin was observed turbidimetrically.<sup>S2</sup> The IC<sub>50</sub> was defined as the compound concentration that inhibited the extent of assembly by 50% after a 20 min incubation.

**Cell lines, and Sulforhodamine B (SRB) assay.** DU-145 (prostate), SK-OV-3 (ovarian), and NCI-H460 (lung) cancer cell lines were obtained from ATCC and maintained according to recommended conditions. Gentamicin and amphotericin were used as appropriate antibiotic and antifungal agents. Inhibition of human cancer cell line growth was assessed using the National Cancer Institute's standard sulforhodamine B (SRB) assay, as previously described.<sup>S3-S5</sup> A growth inhibition of 50% in comparison to untreated controls (GI<sub>50</sub> or the drug concentrations causing a 50% reduction in net protein increase) was calculated.<sup>S3,S5</sup> Results reported are averages of at least three separate experiments, each of which was carried out in triplicate.

## References

- (S1) Hamel, E. *Cell Biochem. Biophys.* **2003**, *38*, 1-21.
- (S2) Verdier-Pinard, P.; Lai, J. Y.; Yoo, H. D.; Yu, J.; Marquez, B.; Nagle, D. G.; Nambu, M.; White, J. D.; Falck, J. R.; Gerwick, W. H.; Day, B. W.; Hamel, E. *Mol. Pharmacol.* **1998**, *53*, 62-76.
- (S3) Vichai, V.; Kirtikara, K. *Nat. Protocols* **2006**, *1*, 1112-1116.
- (S4) Monks, A.; Scudiero, D.; Skehan, P.; Shoemaker, R.; Paull, K.; Vistica, D.; Hose, C.; Langley, J.; Cronise, P.; Vaigro-Wolff, A.; Gray-Goodrich, M.; Campbell, H.; Mayo, J.; Boyd, M. *J. Natl. Cancer Inst.* **1991**, *83*, 757-766.
- (S5) Siles, R.; Ackley, J. F.; Hadimani, M. B.; Hall, J. J.; Mugabe, B. E.; Guddneppanavar, R.; Monk, K. A.; Chapuis, J.; Pettit, G. R.; Chaplin, D. J.; Edvardsen, K.; Trawick, M. L.; Garner, C. M.; Pinney, K. G. *J. Nat. Prod.* **2008**, *71*, 313-320.



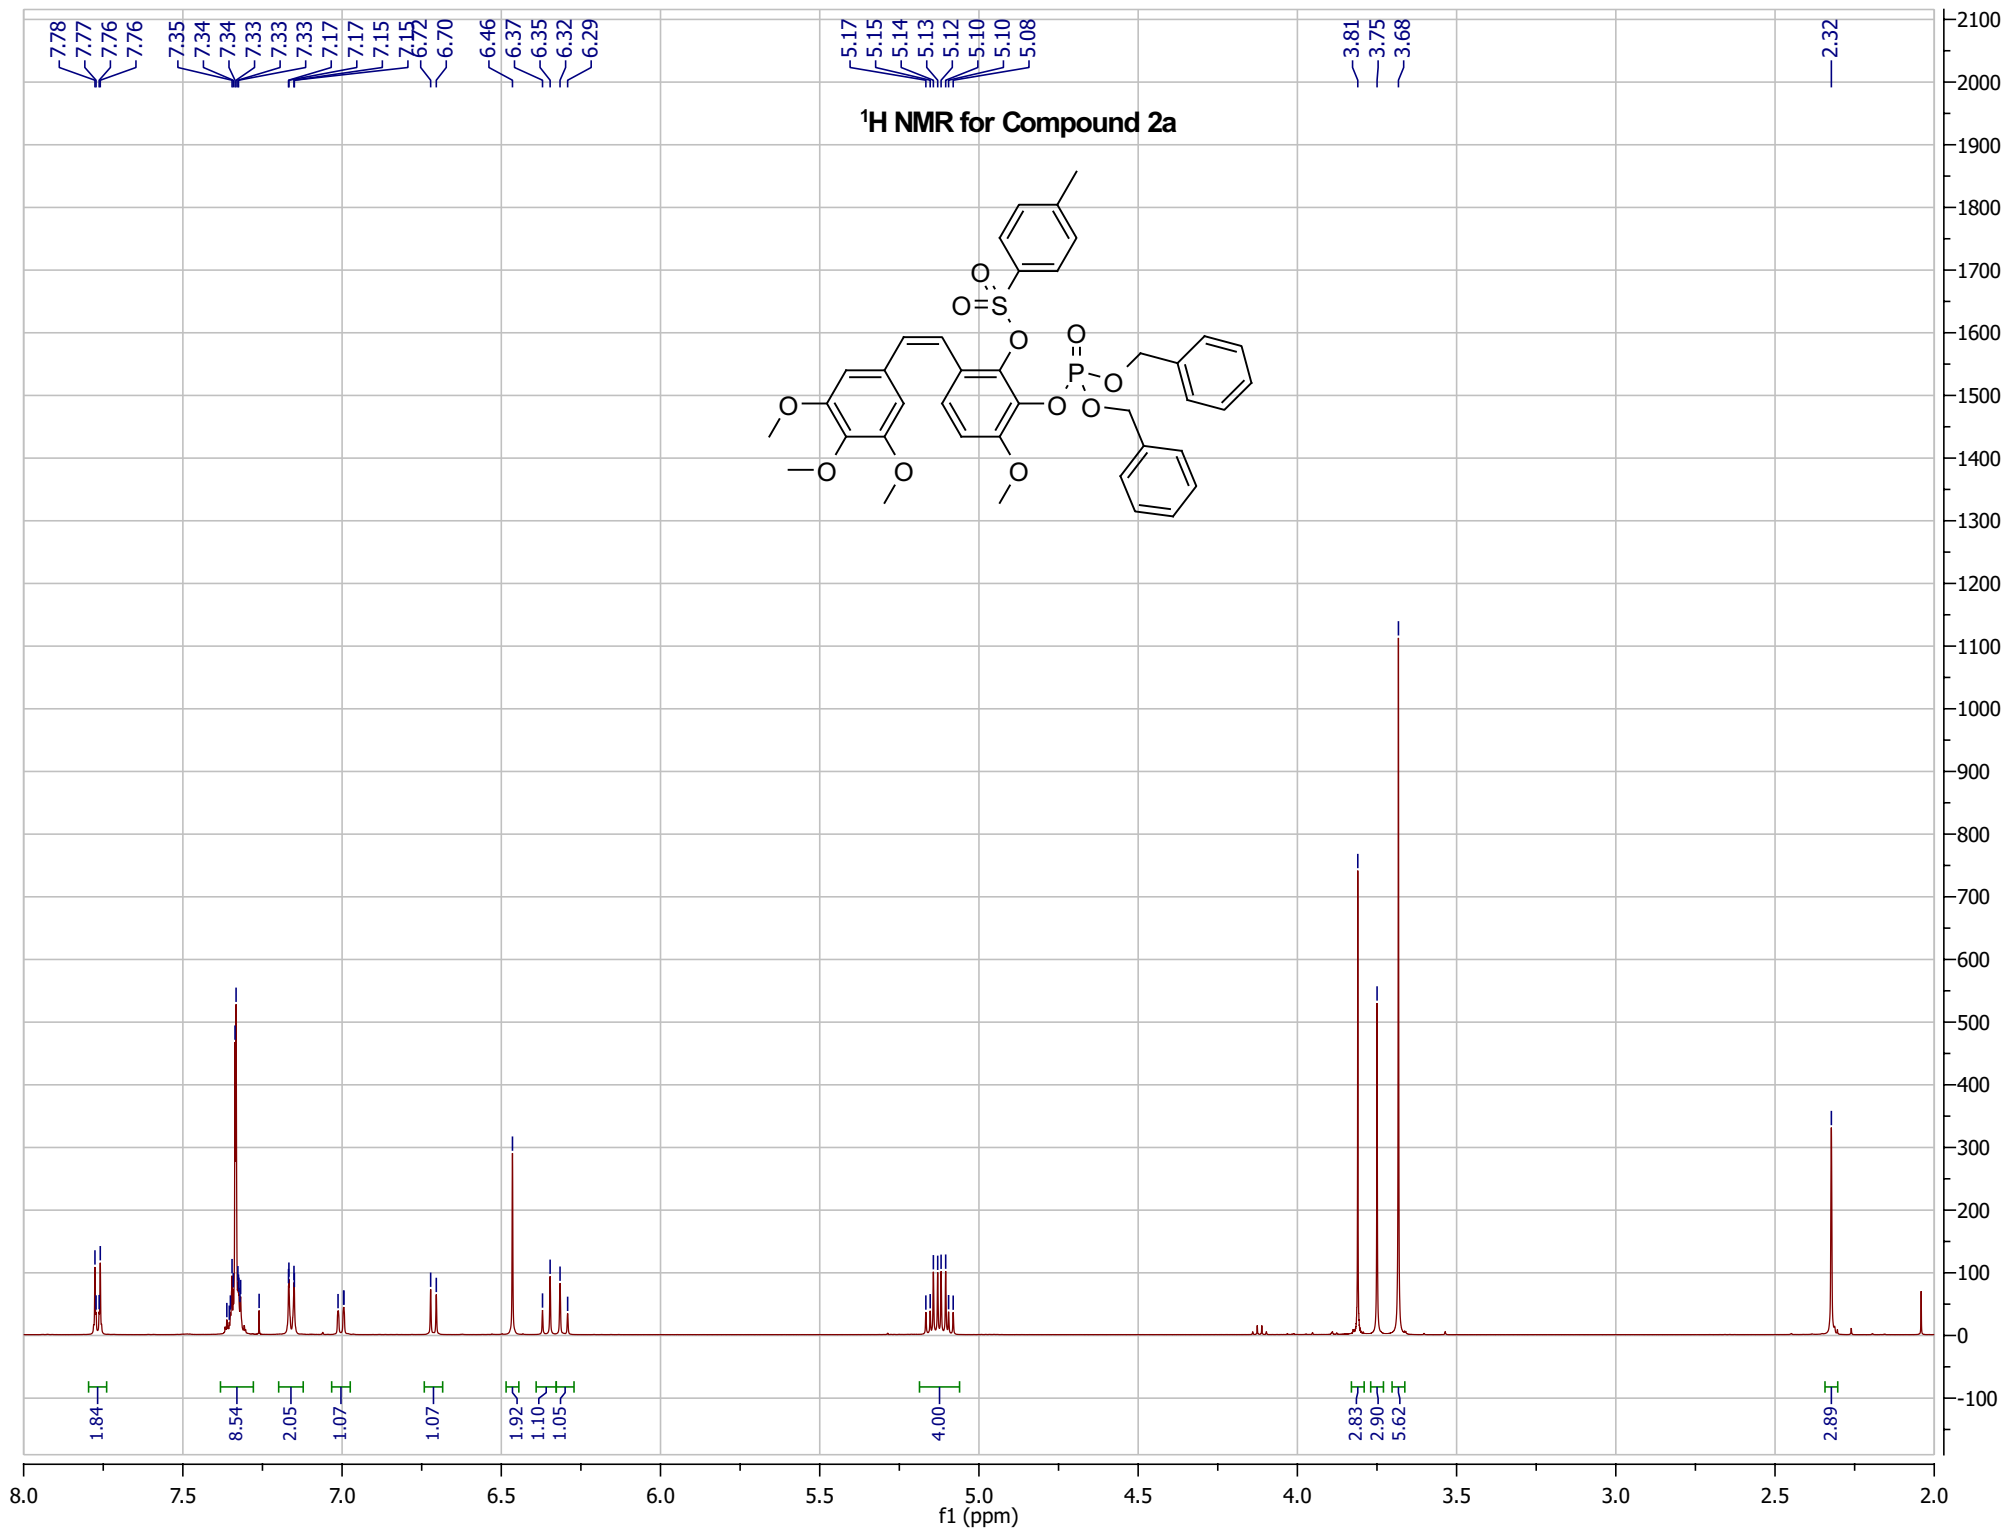

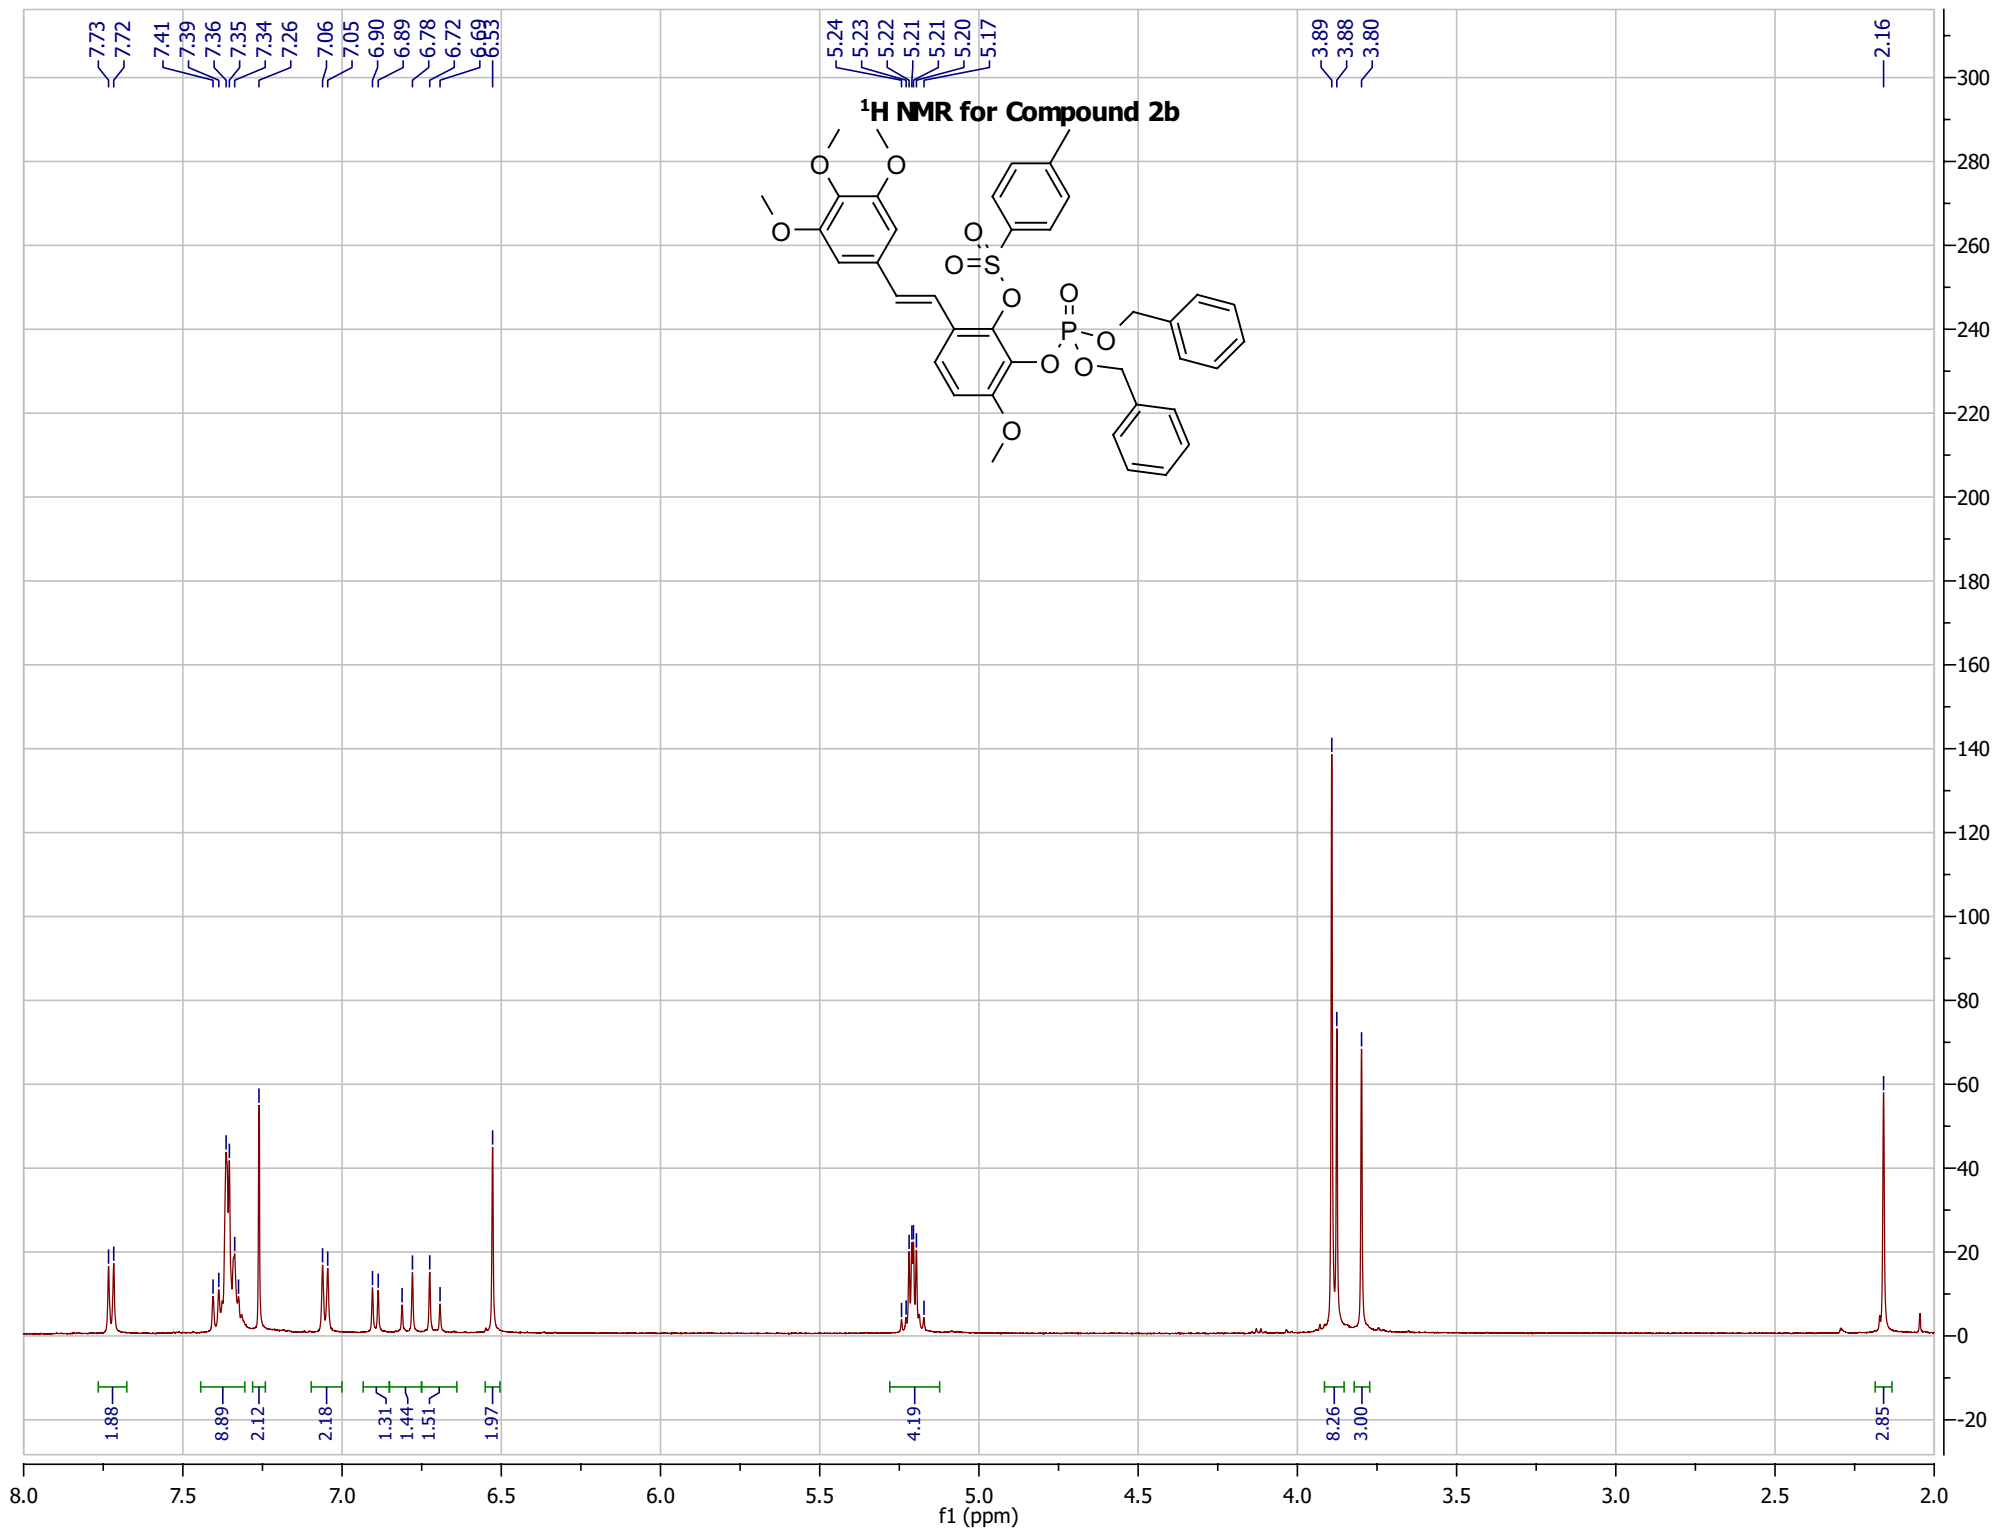

**<sup>1</sup>H NMR for Compound 3a**

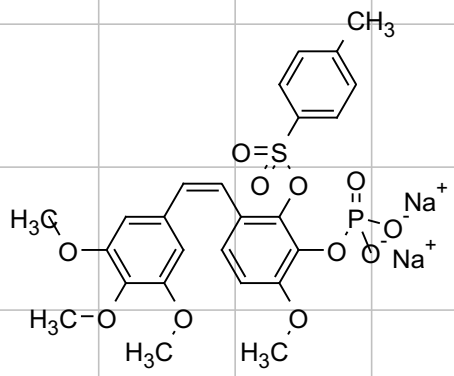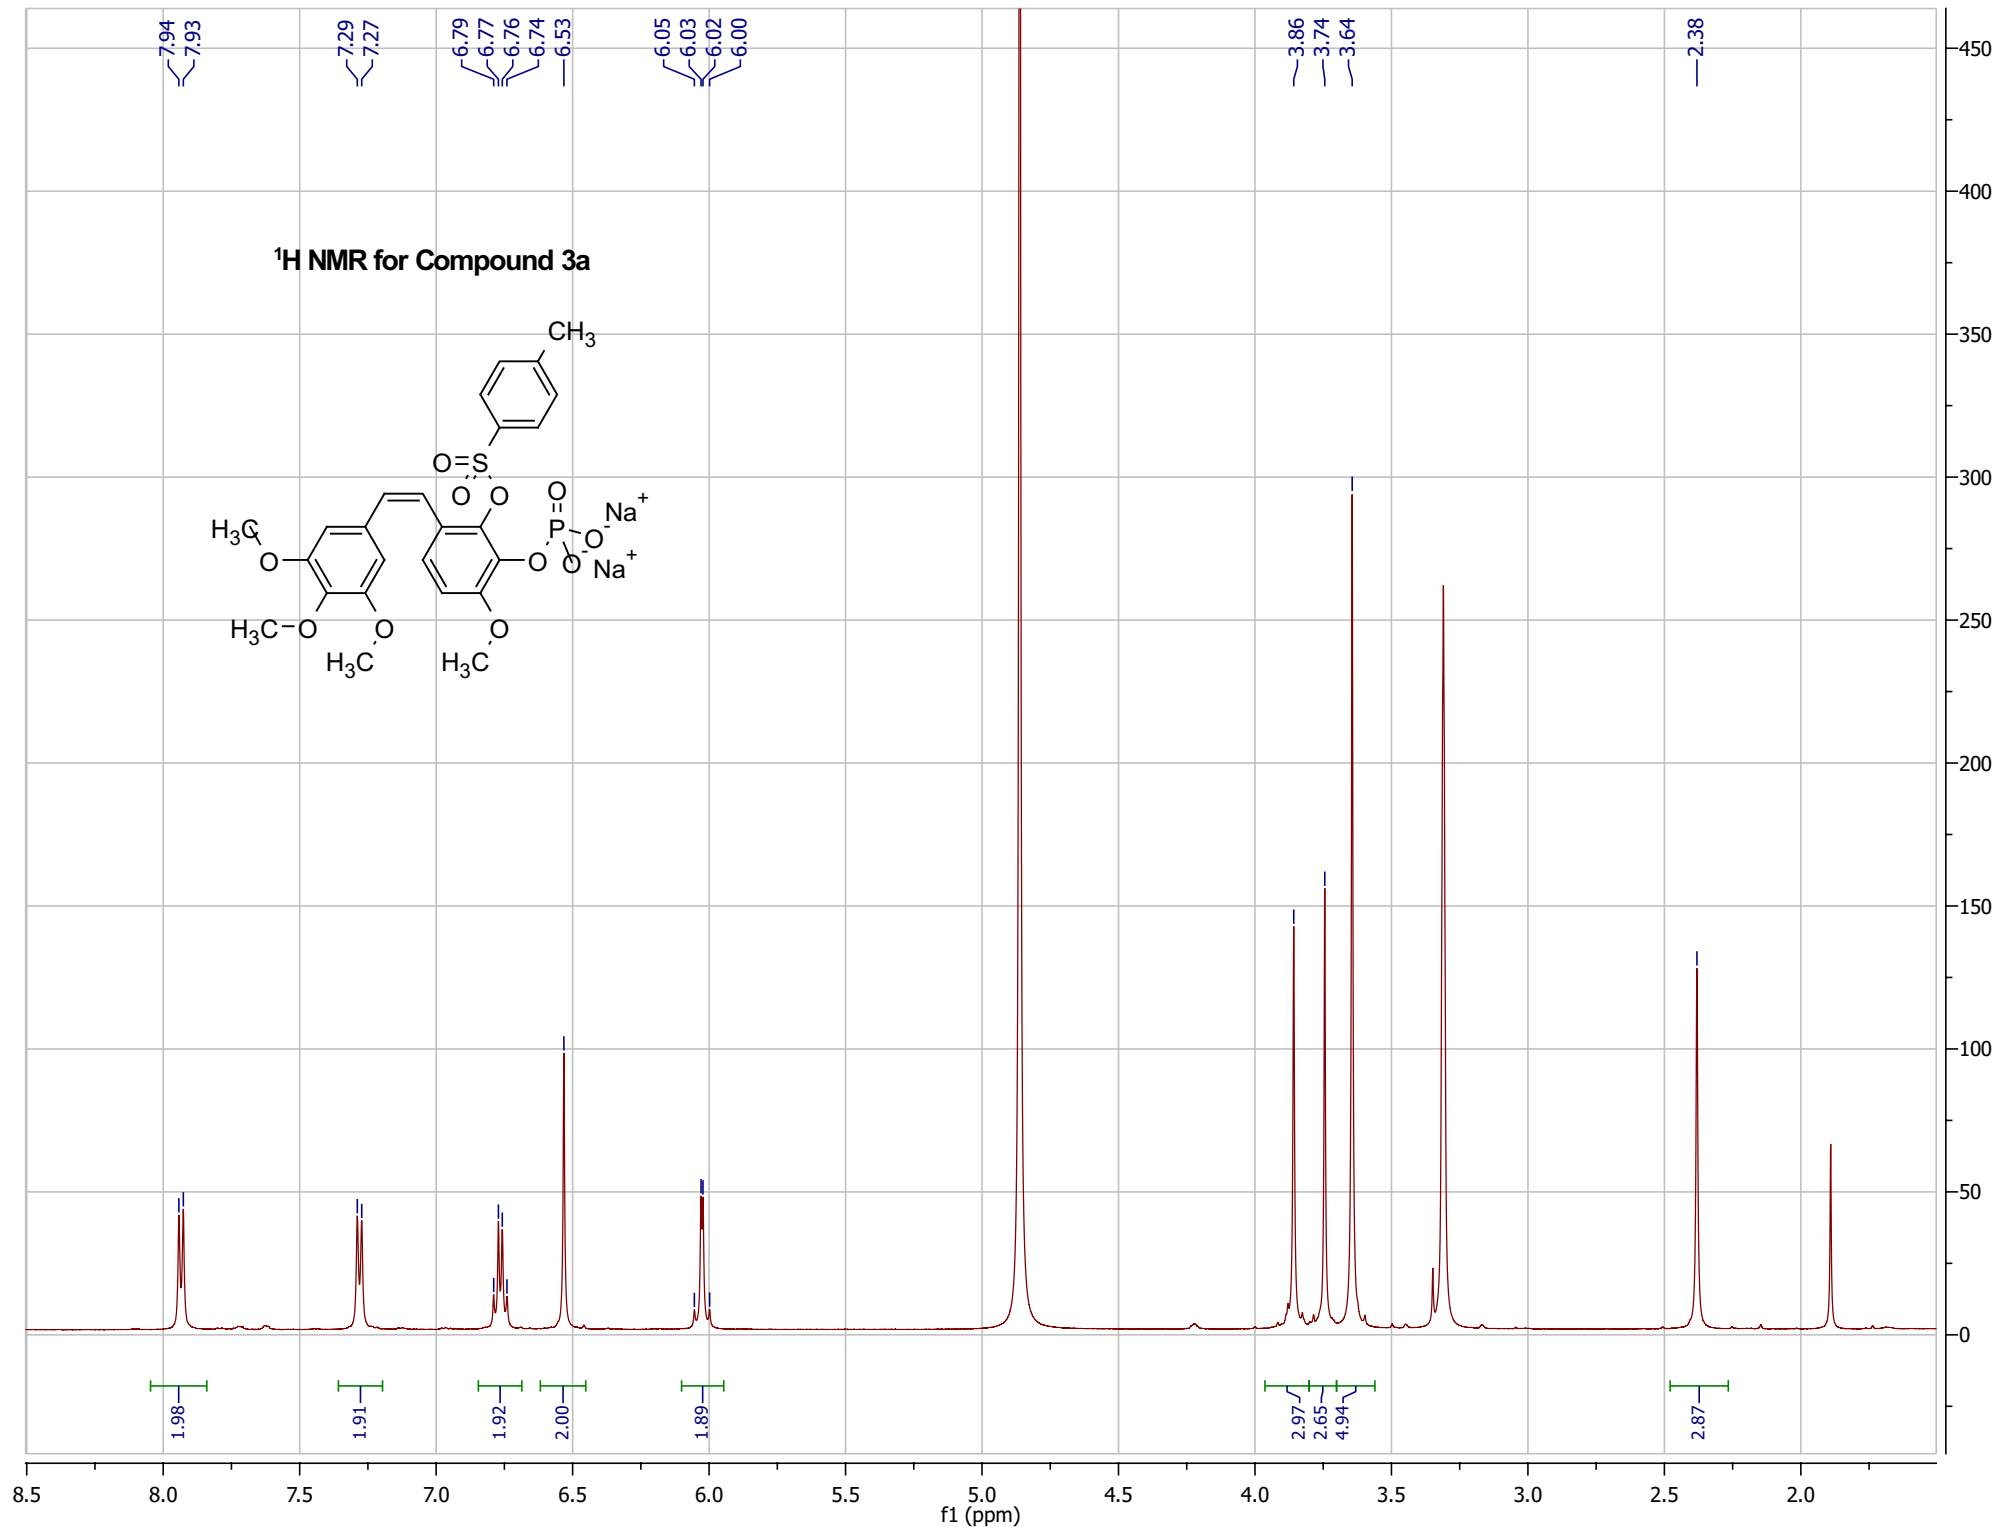

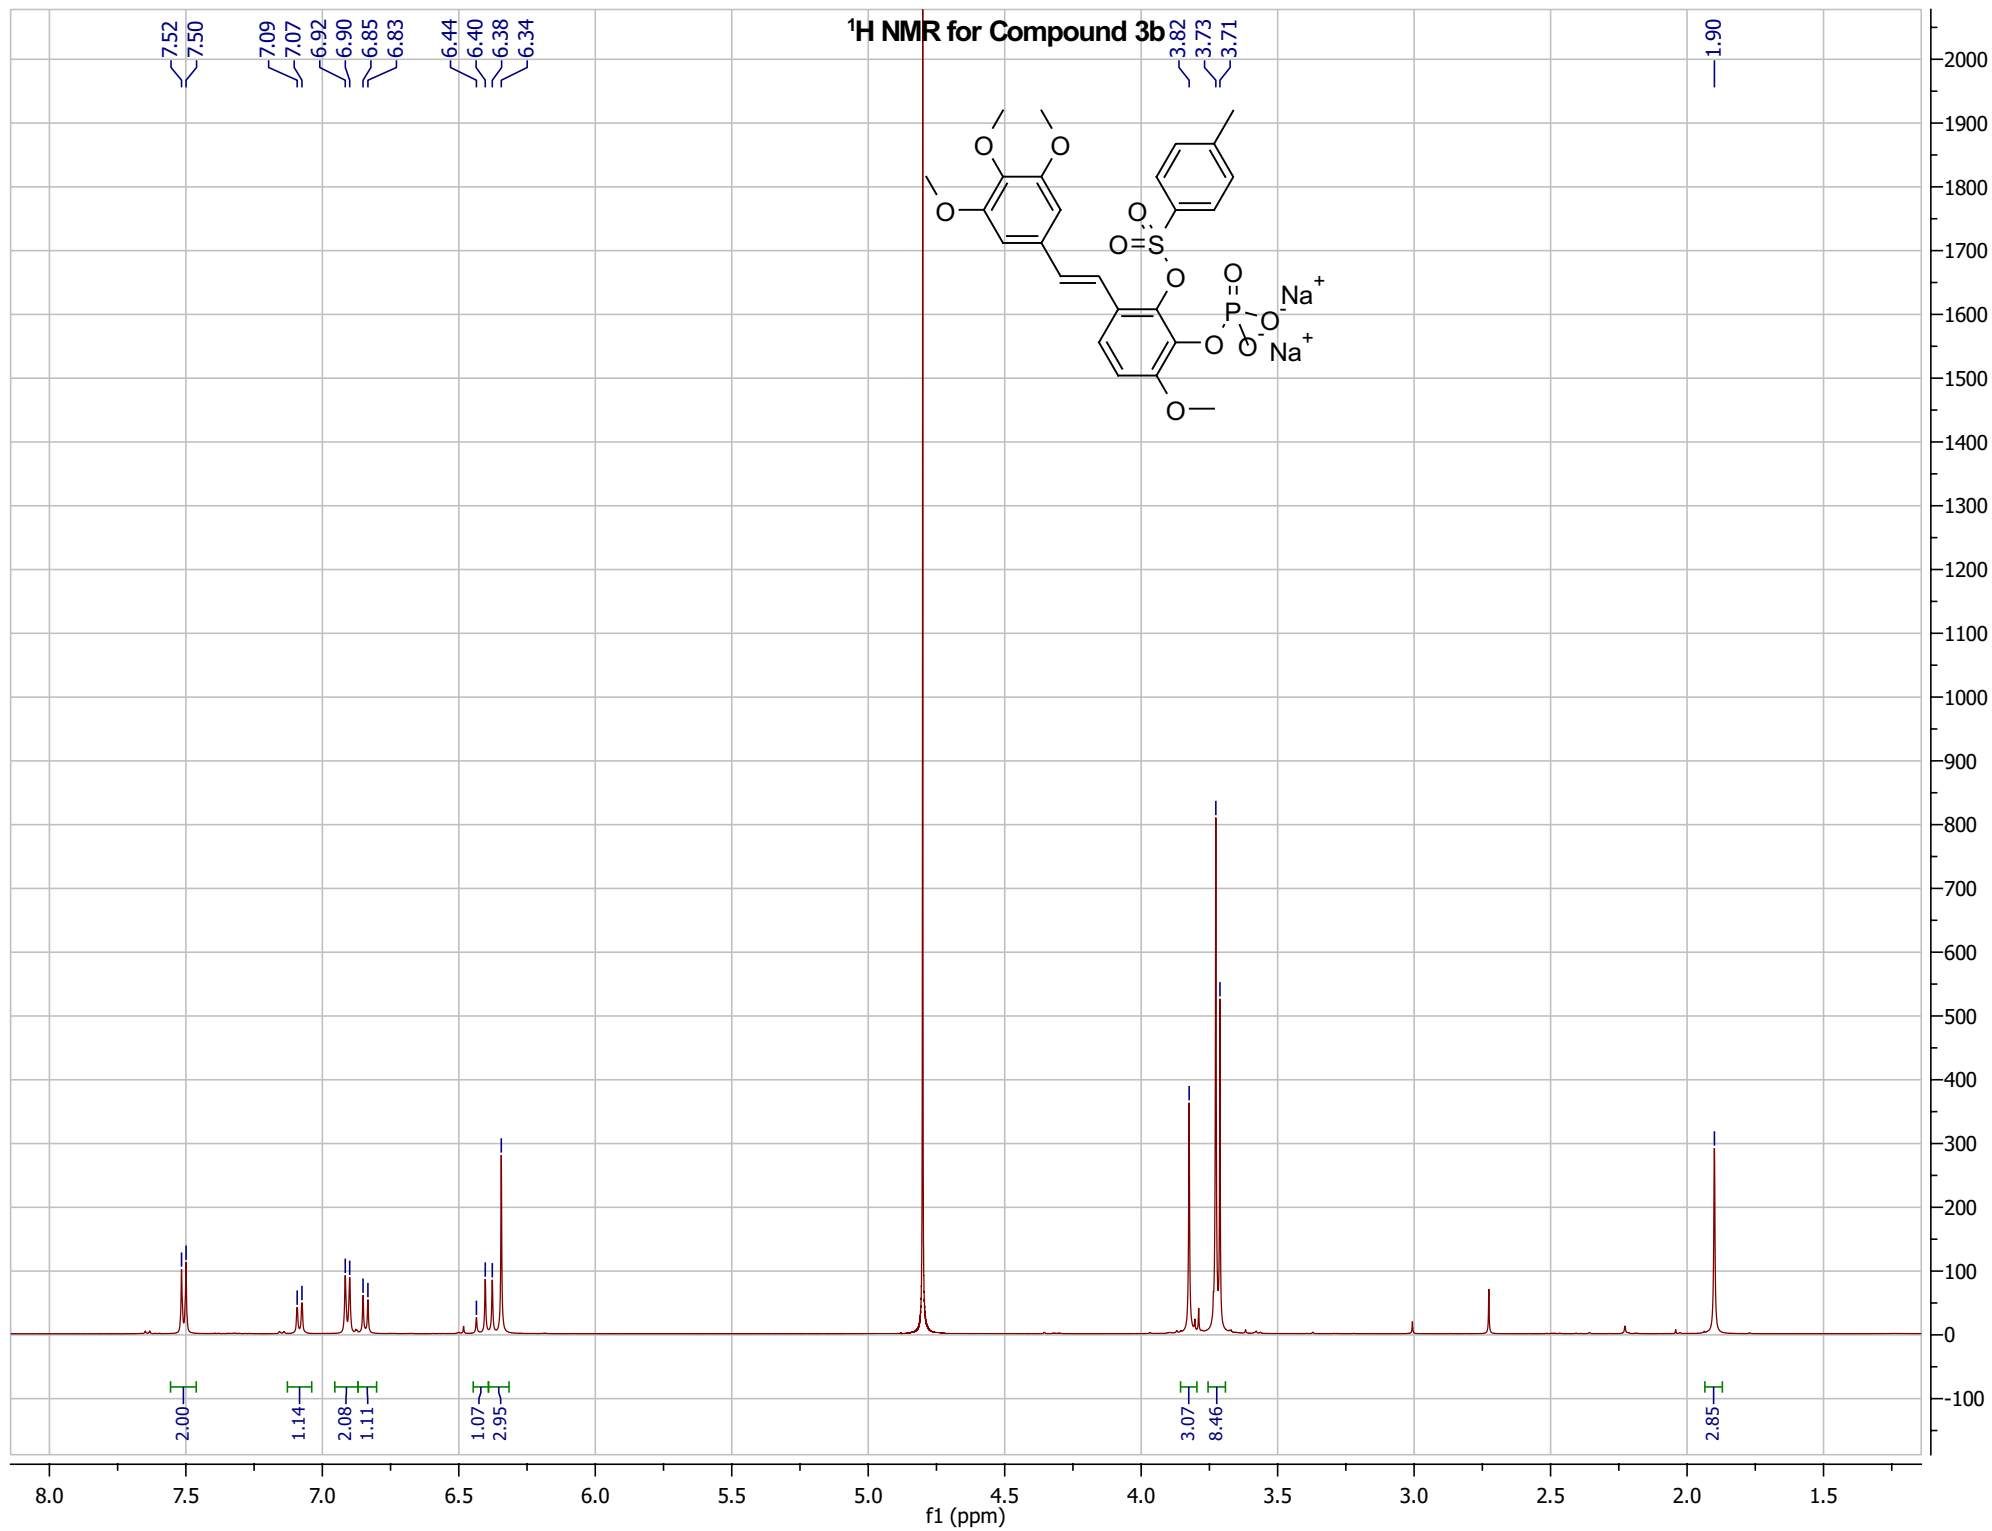

**<sup>1</sup>H NMR for Compound 4a**

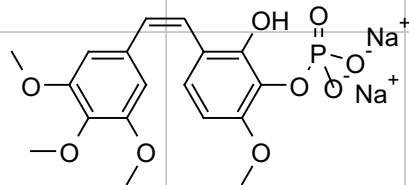

6.6866  
6.6694  
6.5622  
6.5383  
6.5101  
6.4740  
6.4500  
6.3993  
6.3820

3.6899  
3.6135  
3.5443

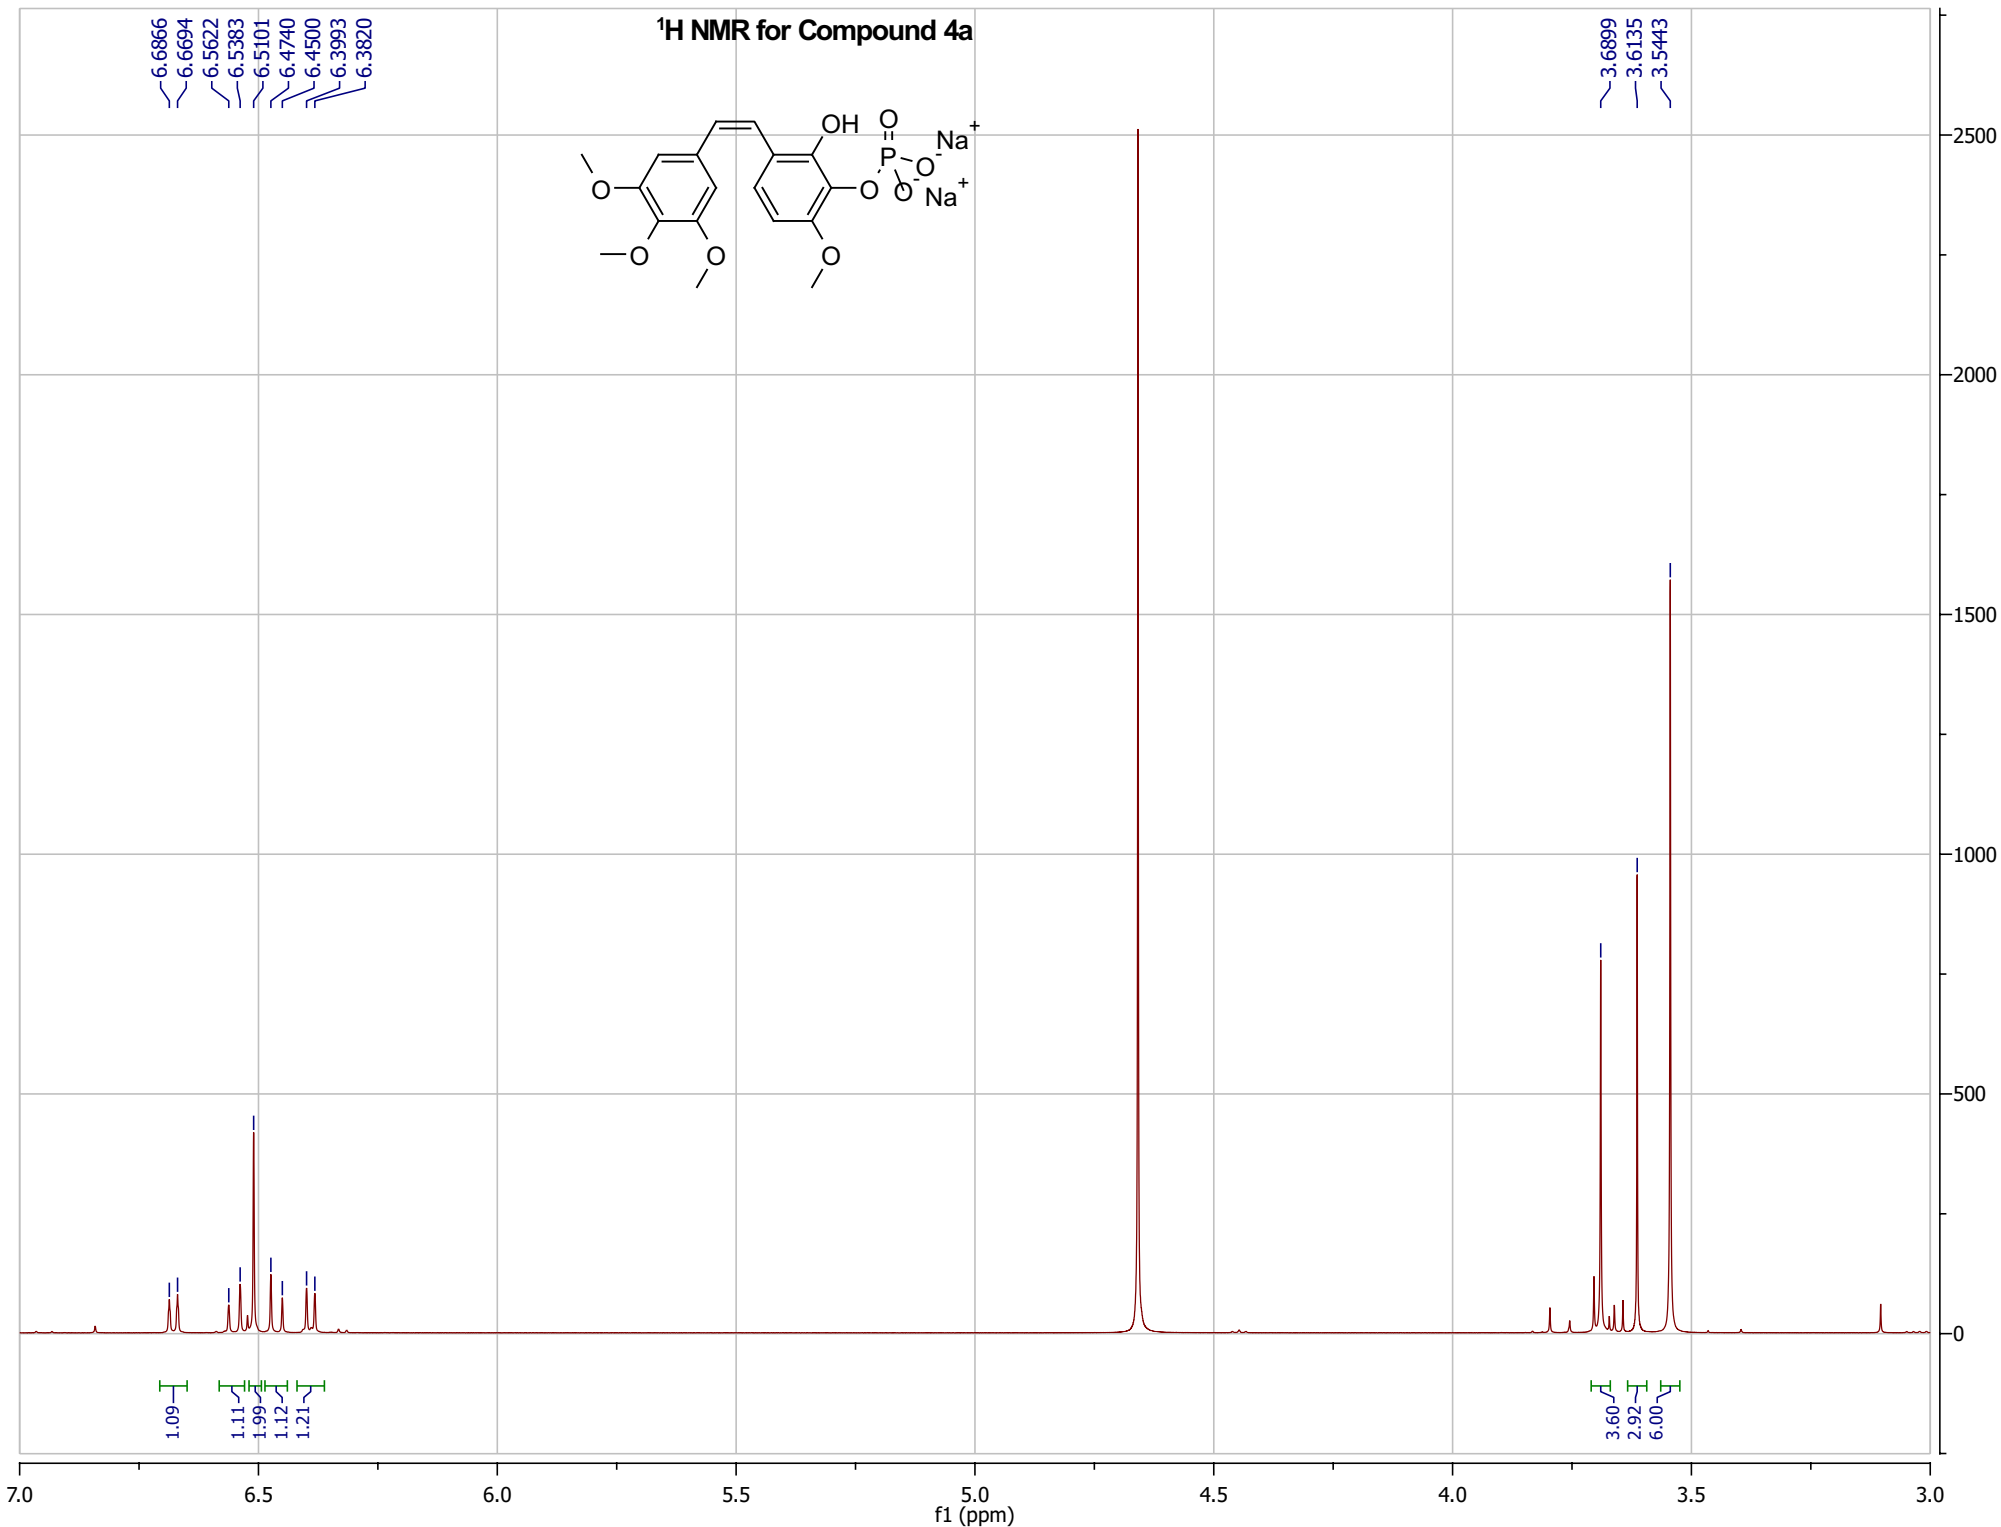

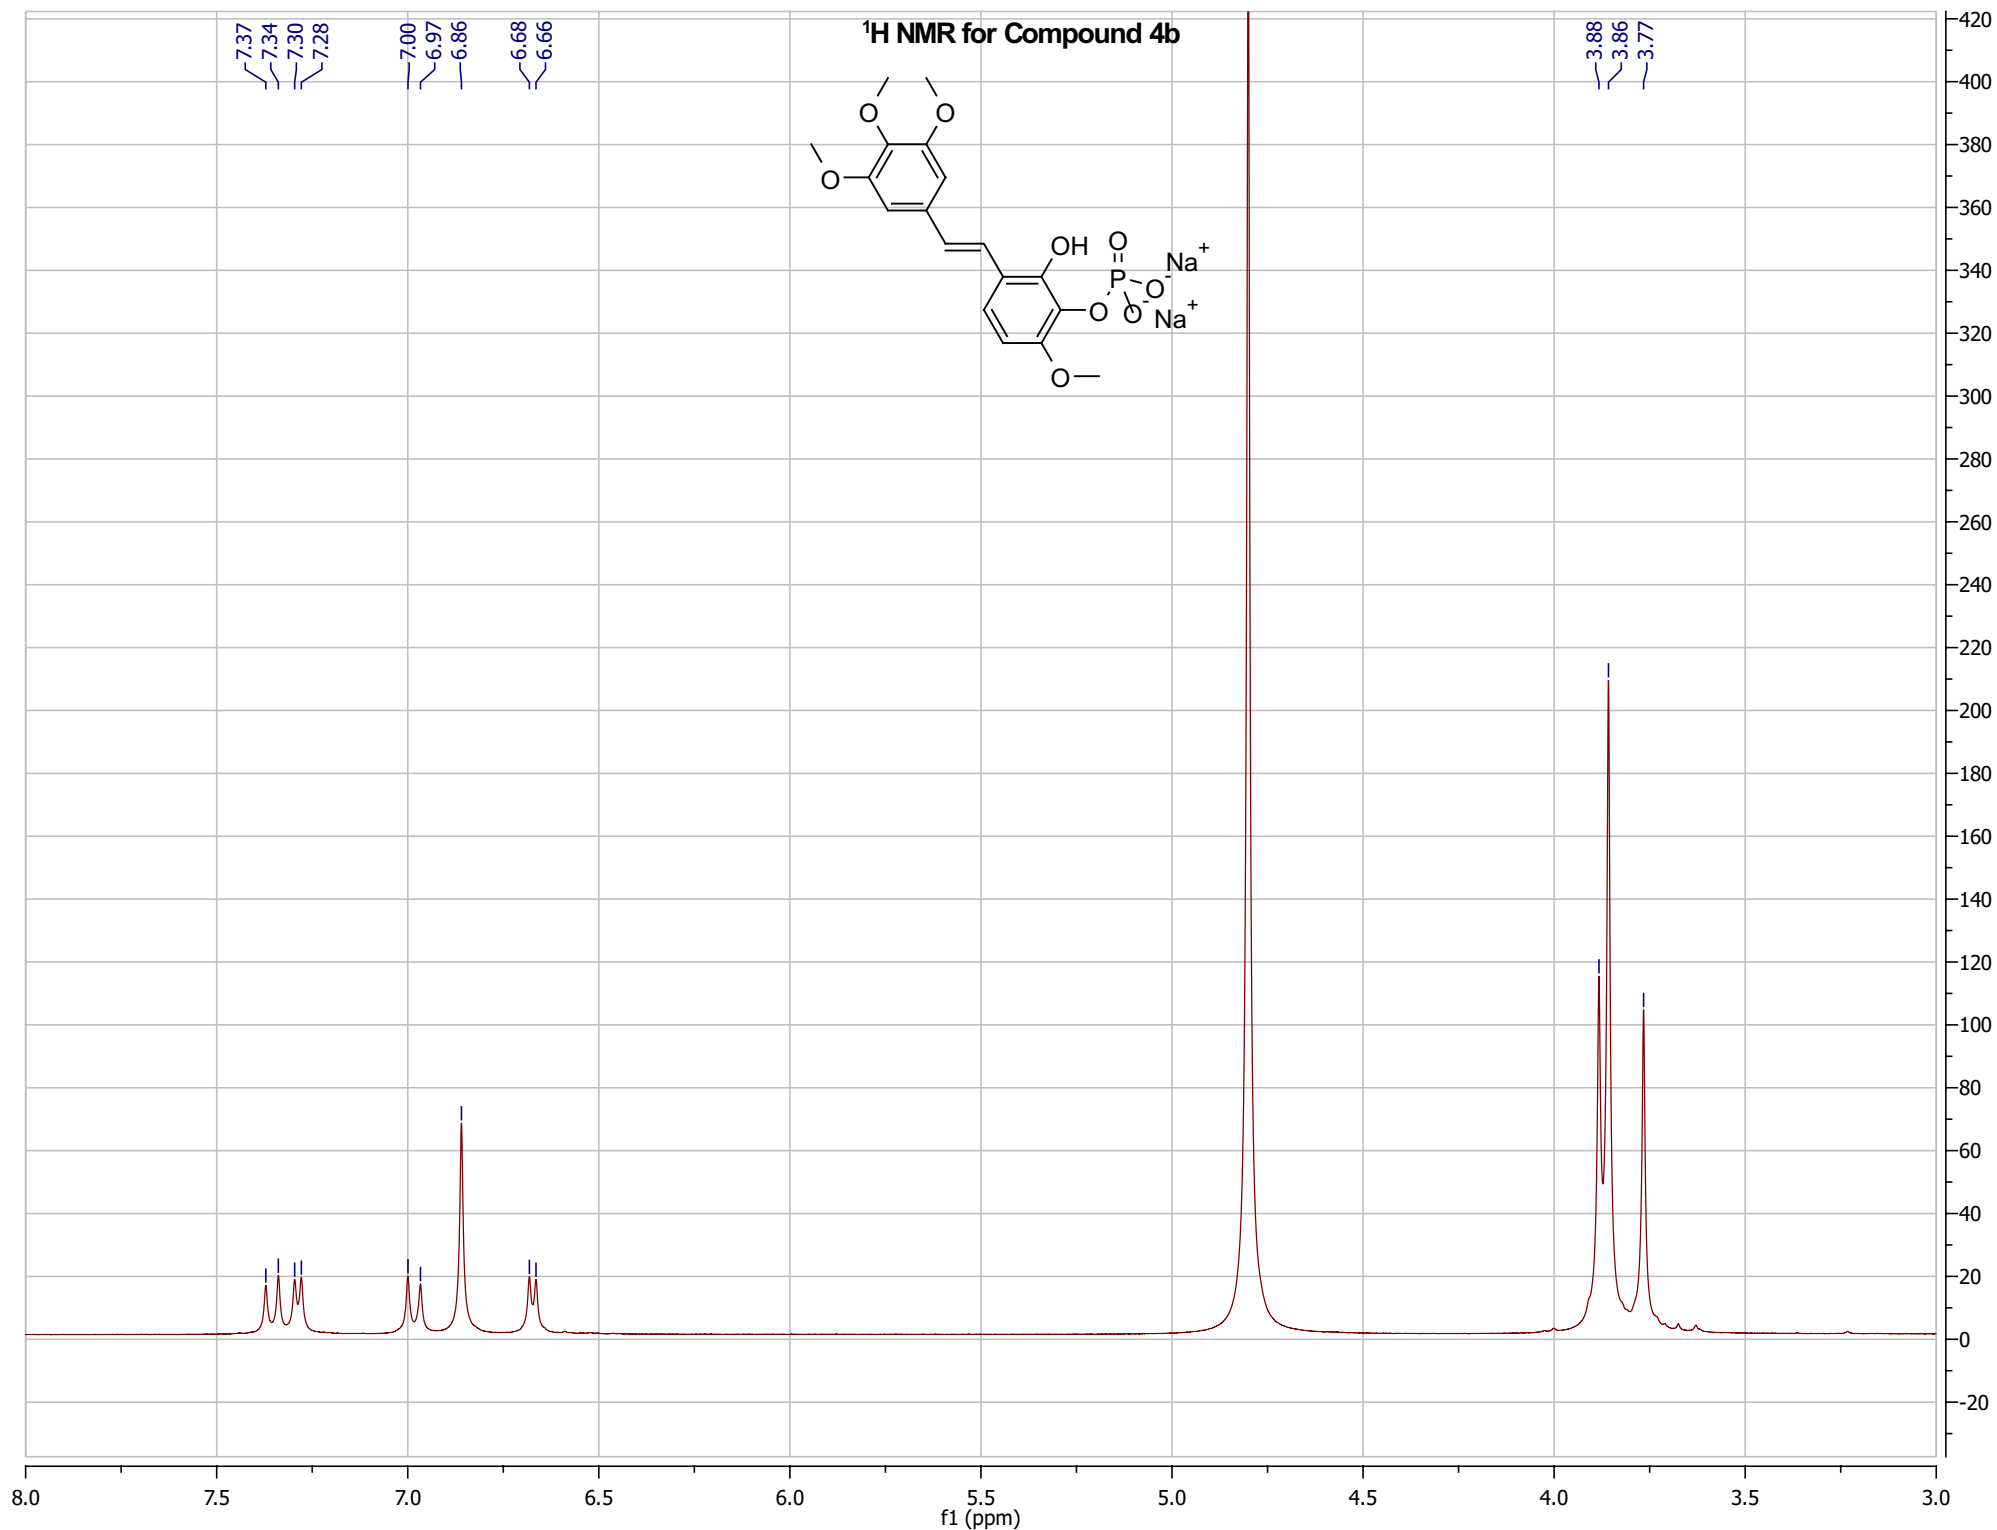

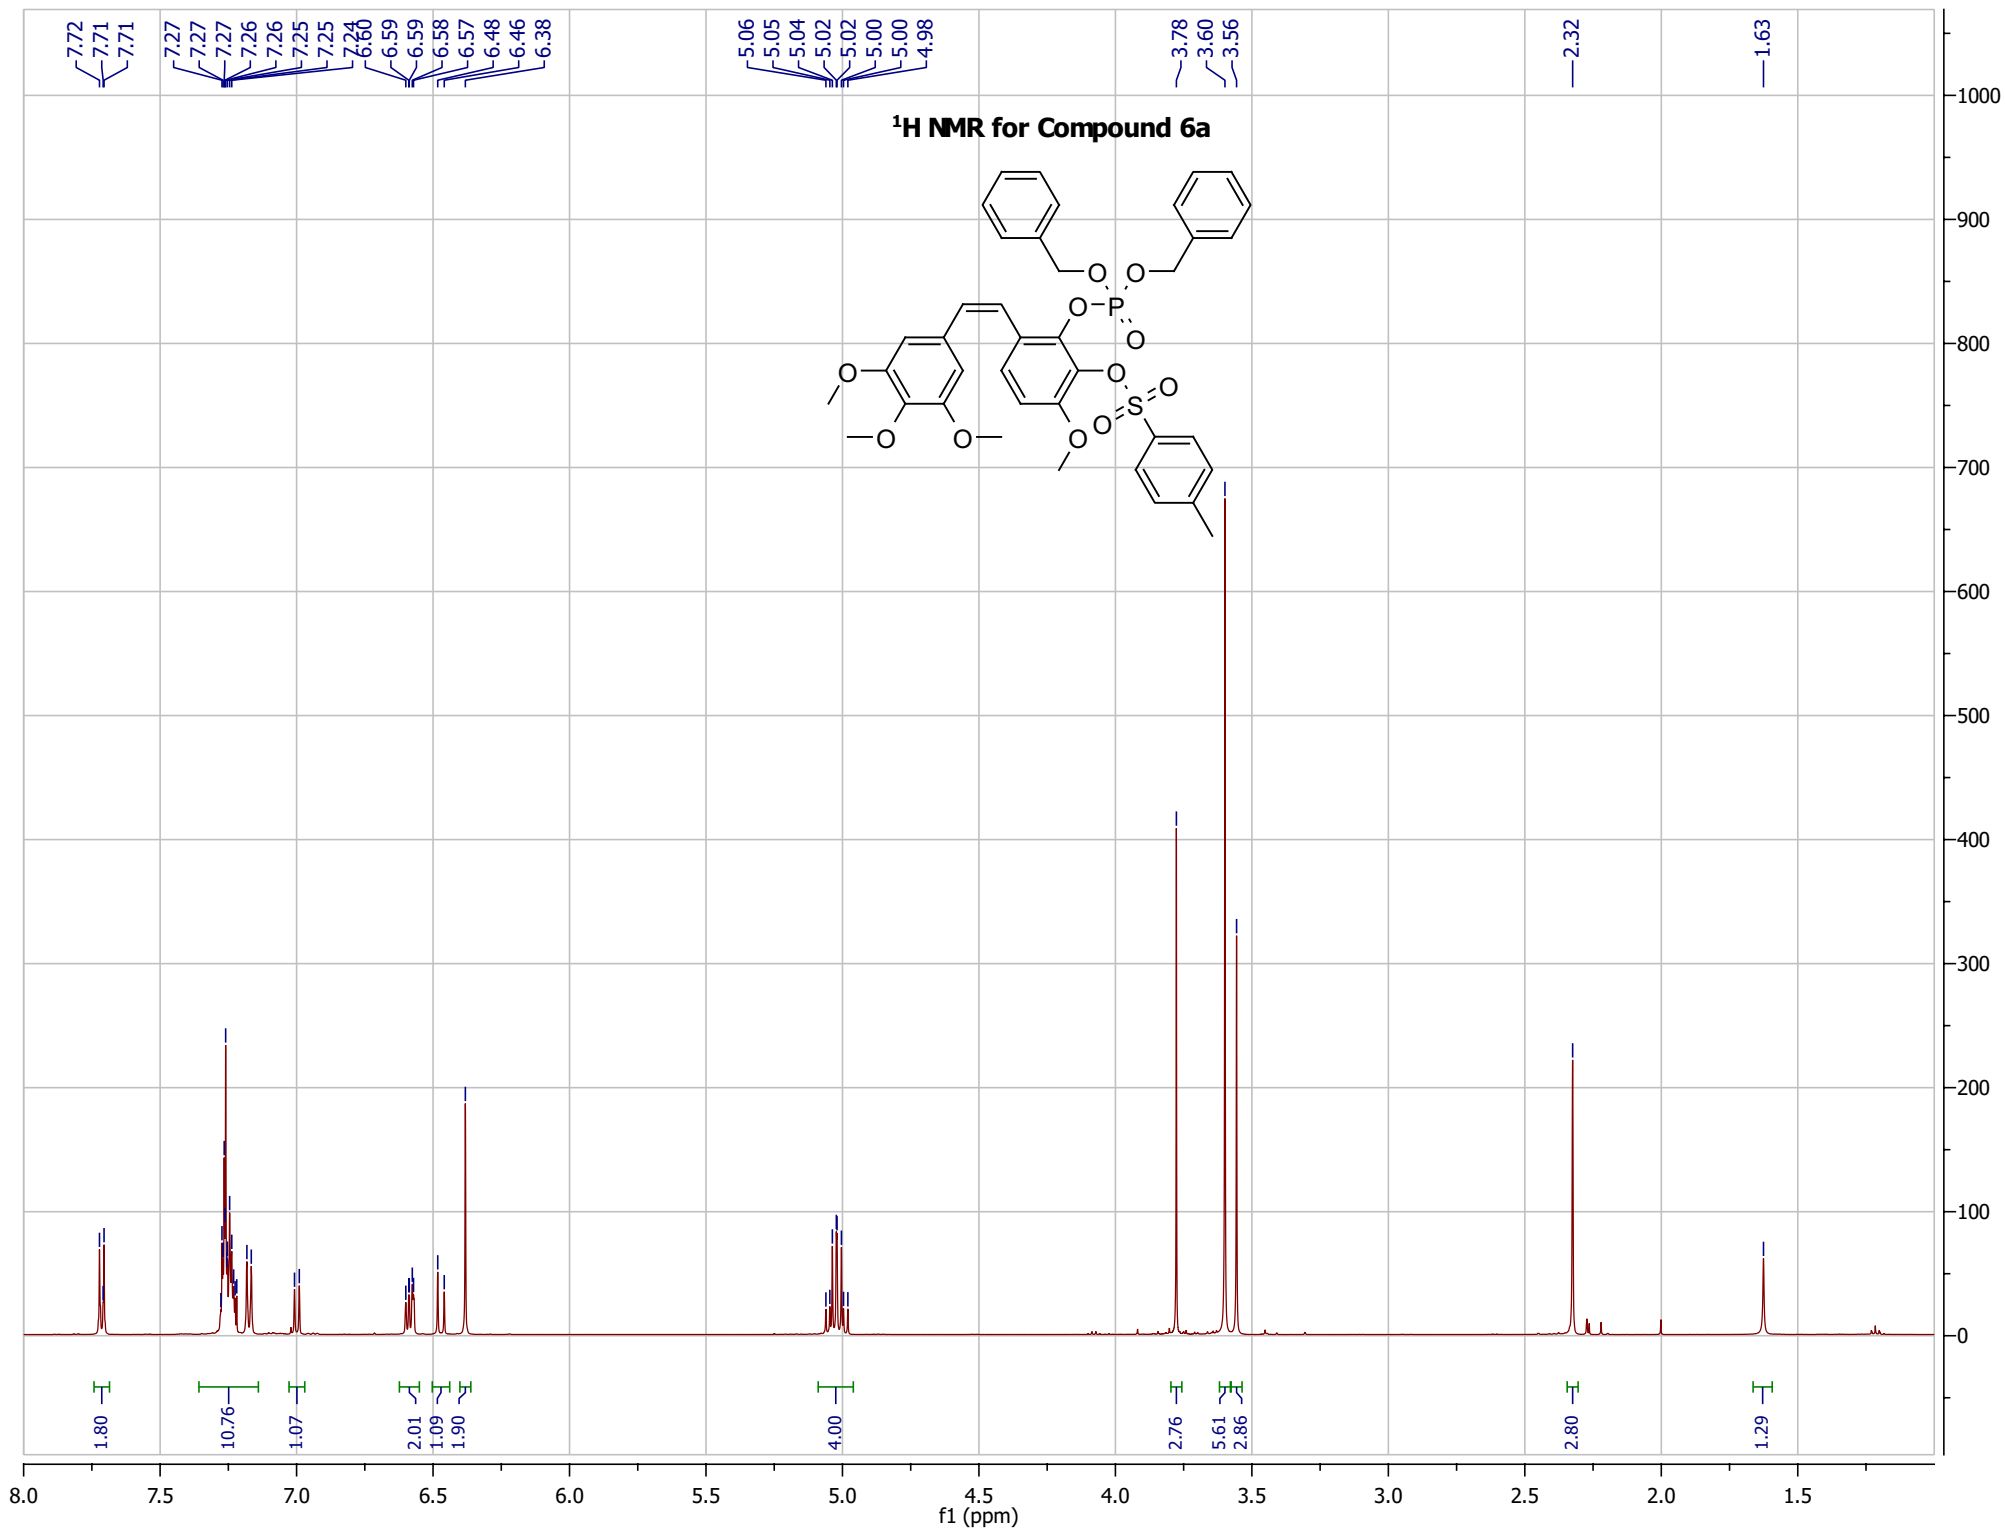

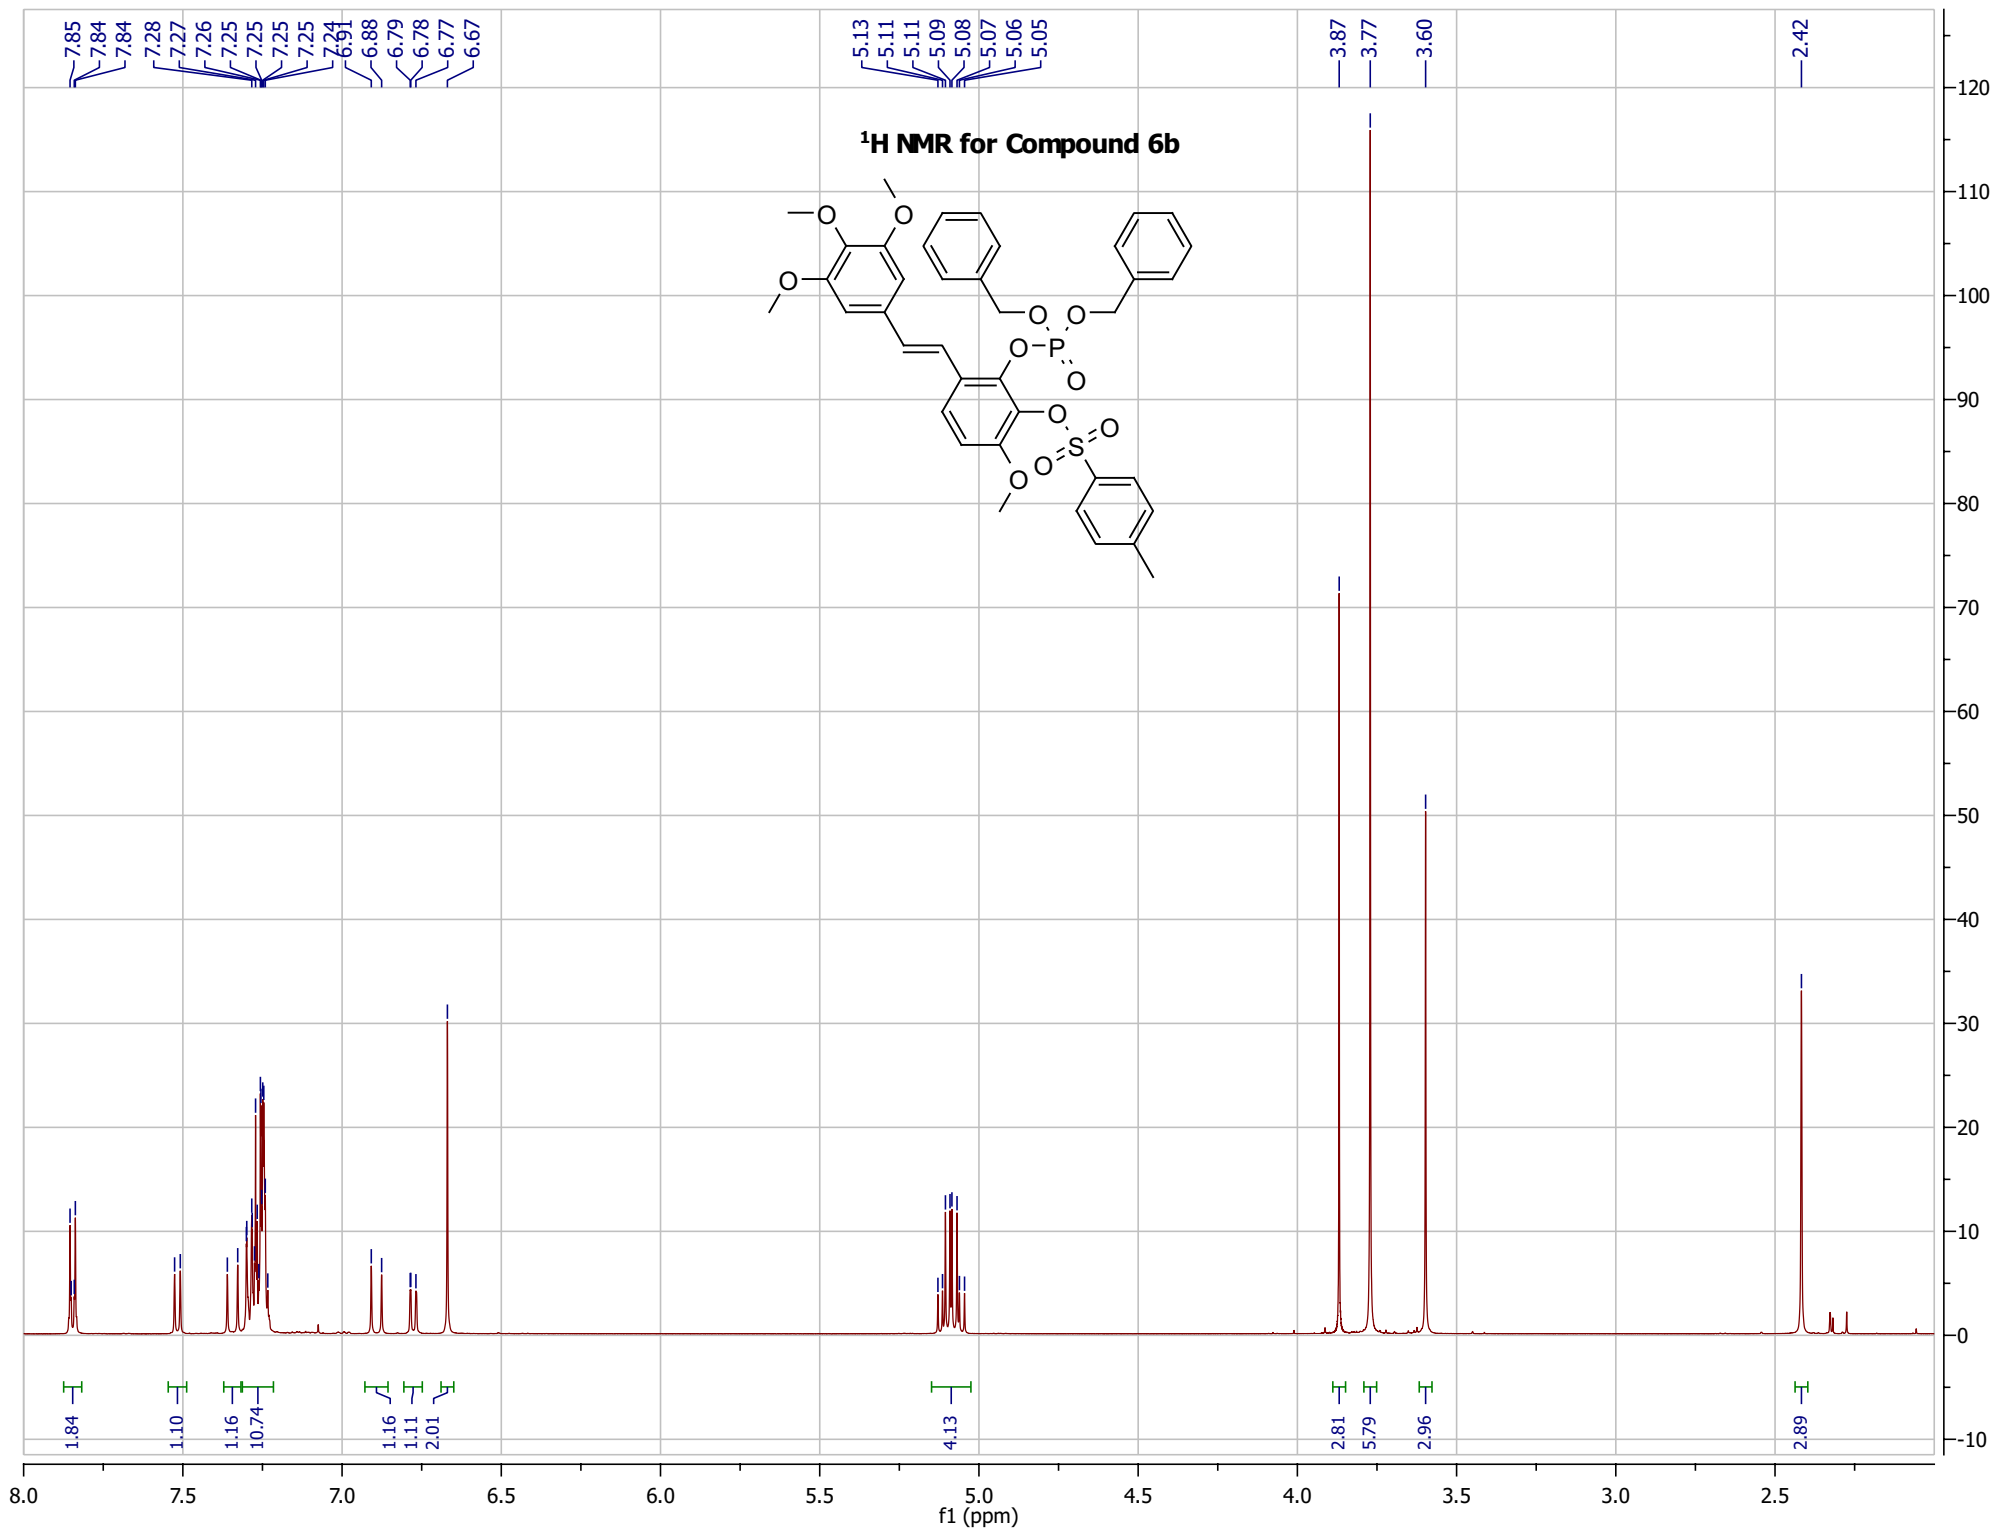



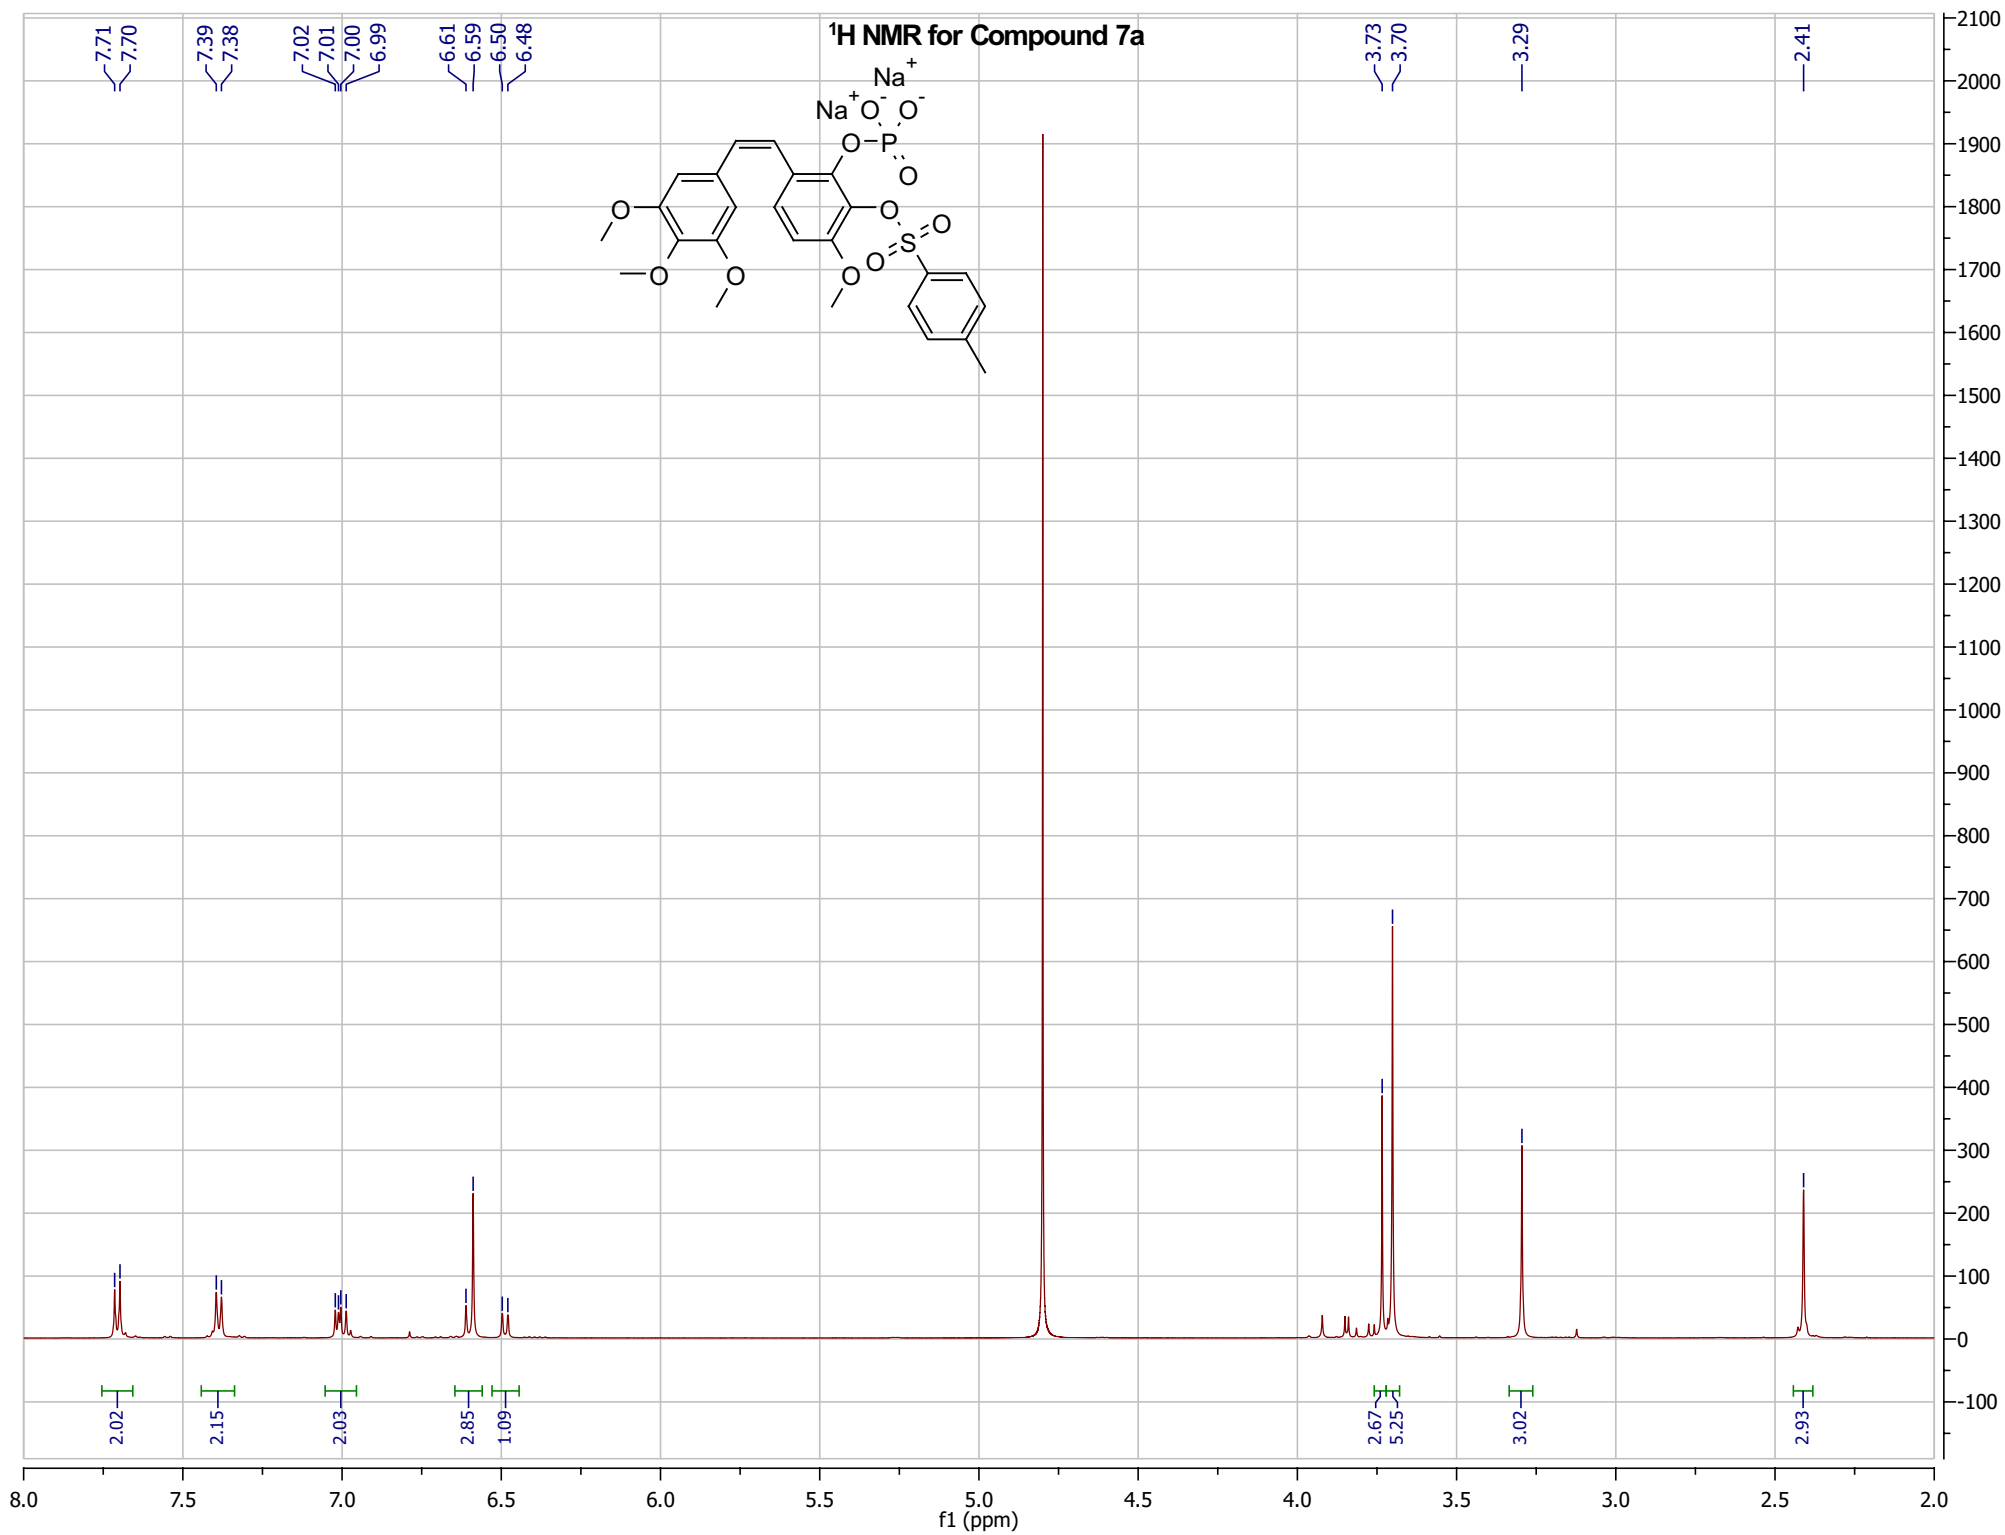

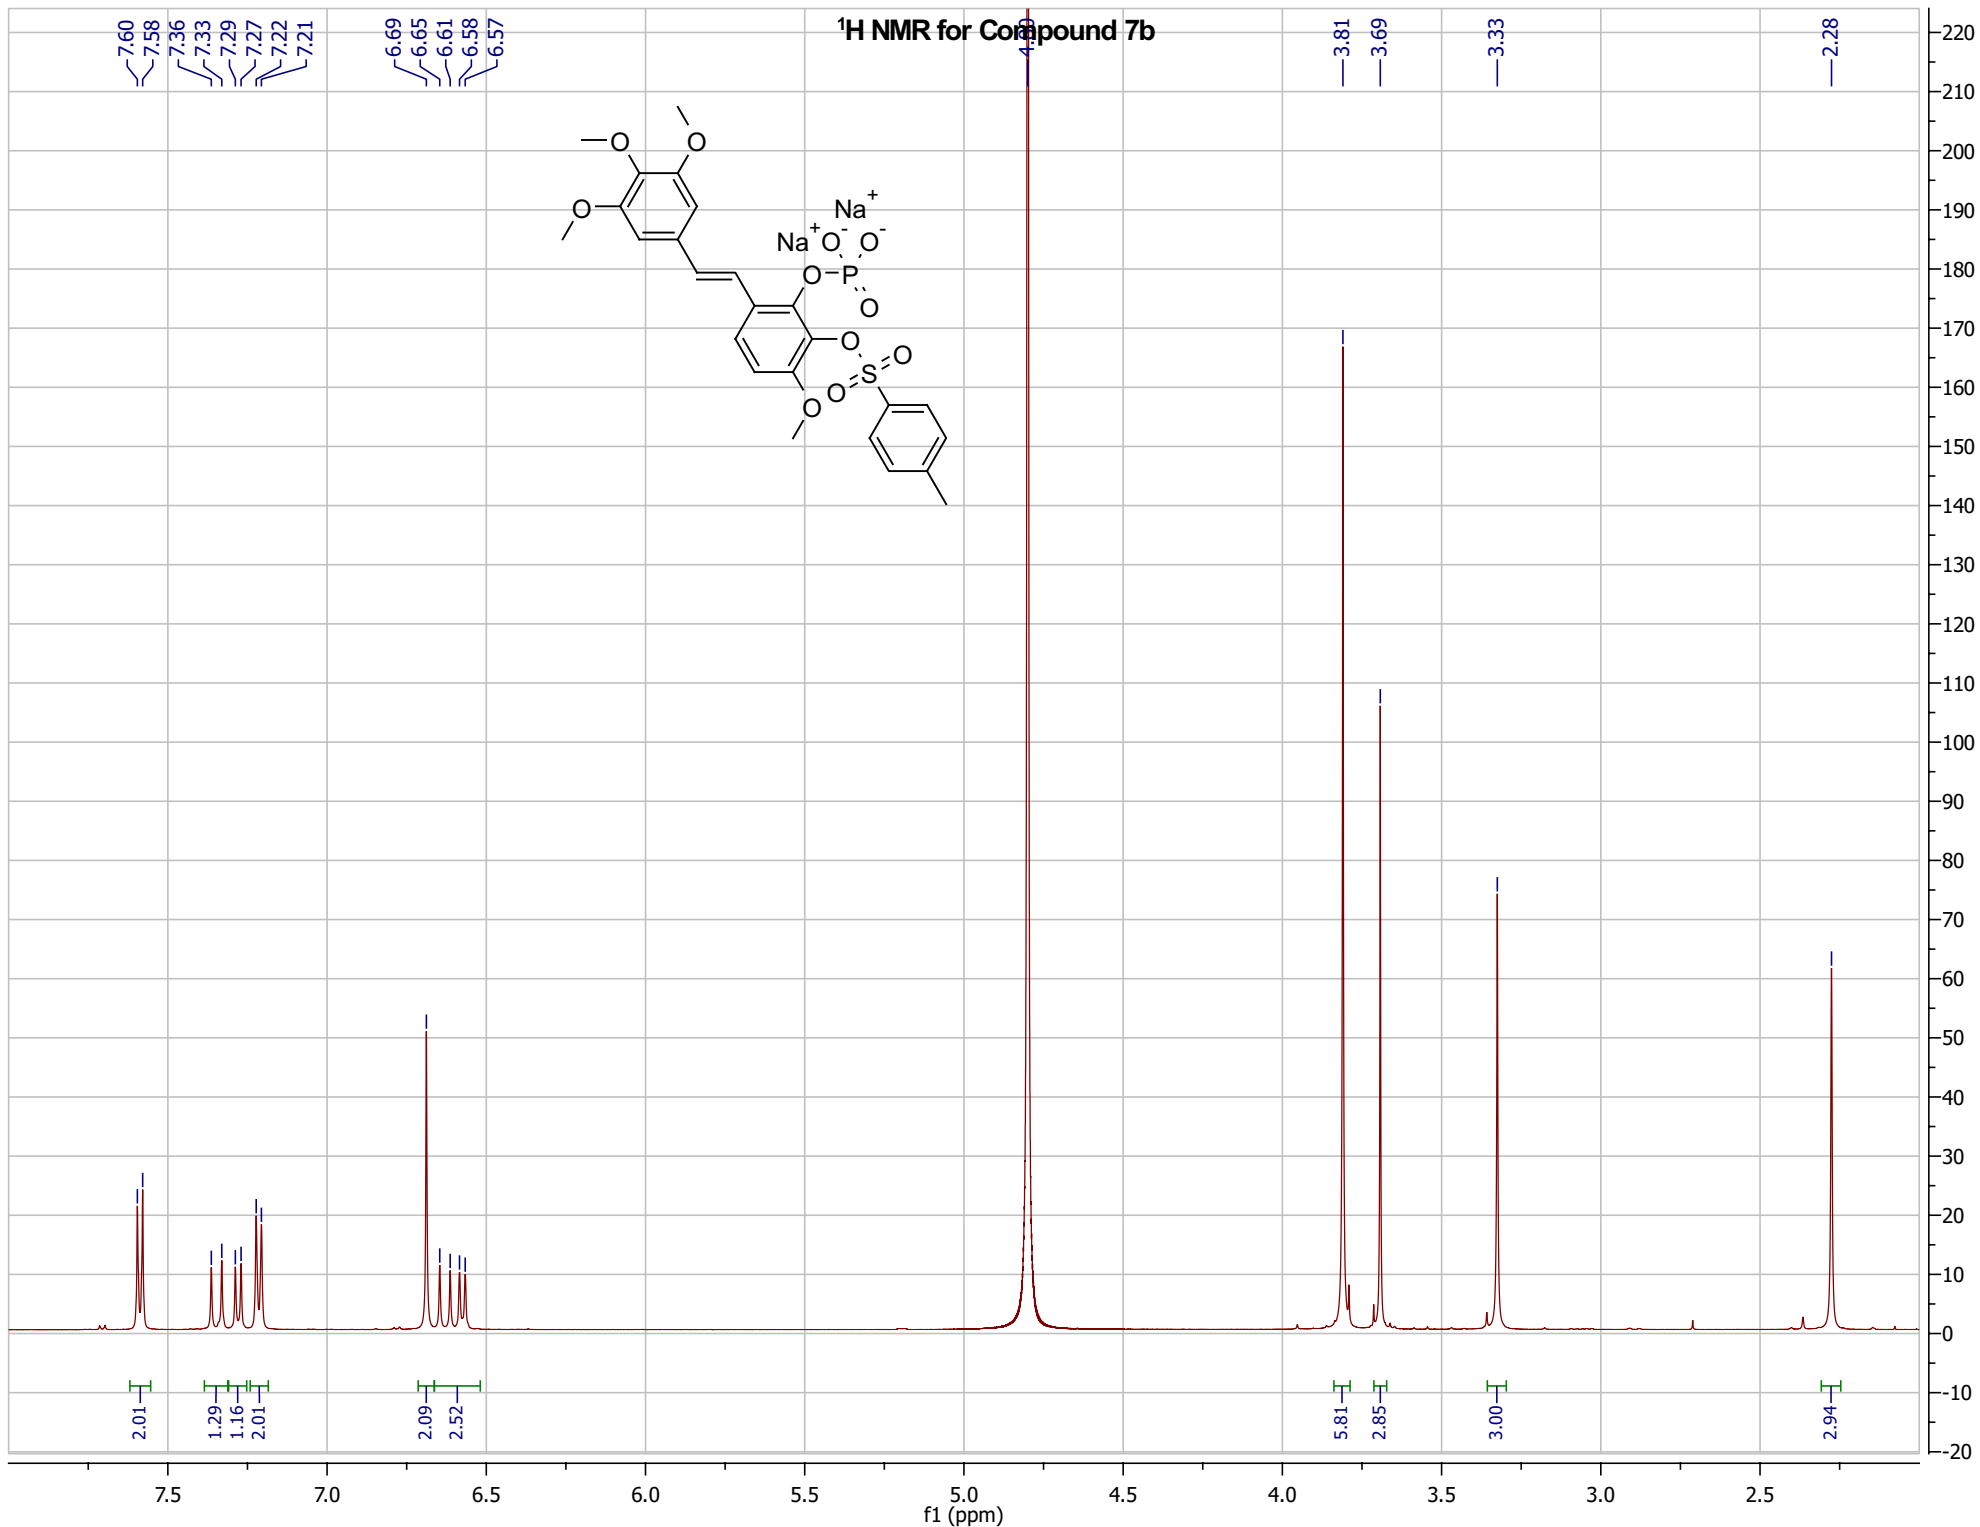

<sup>1</sup>H NMR for Compound 8a

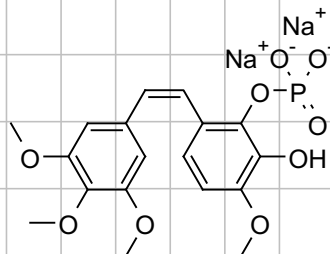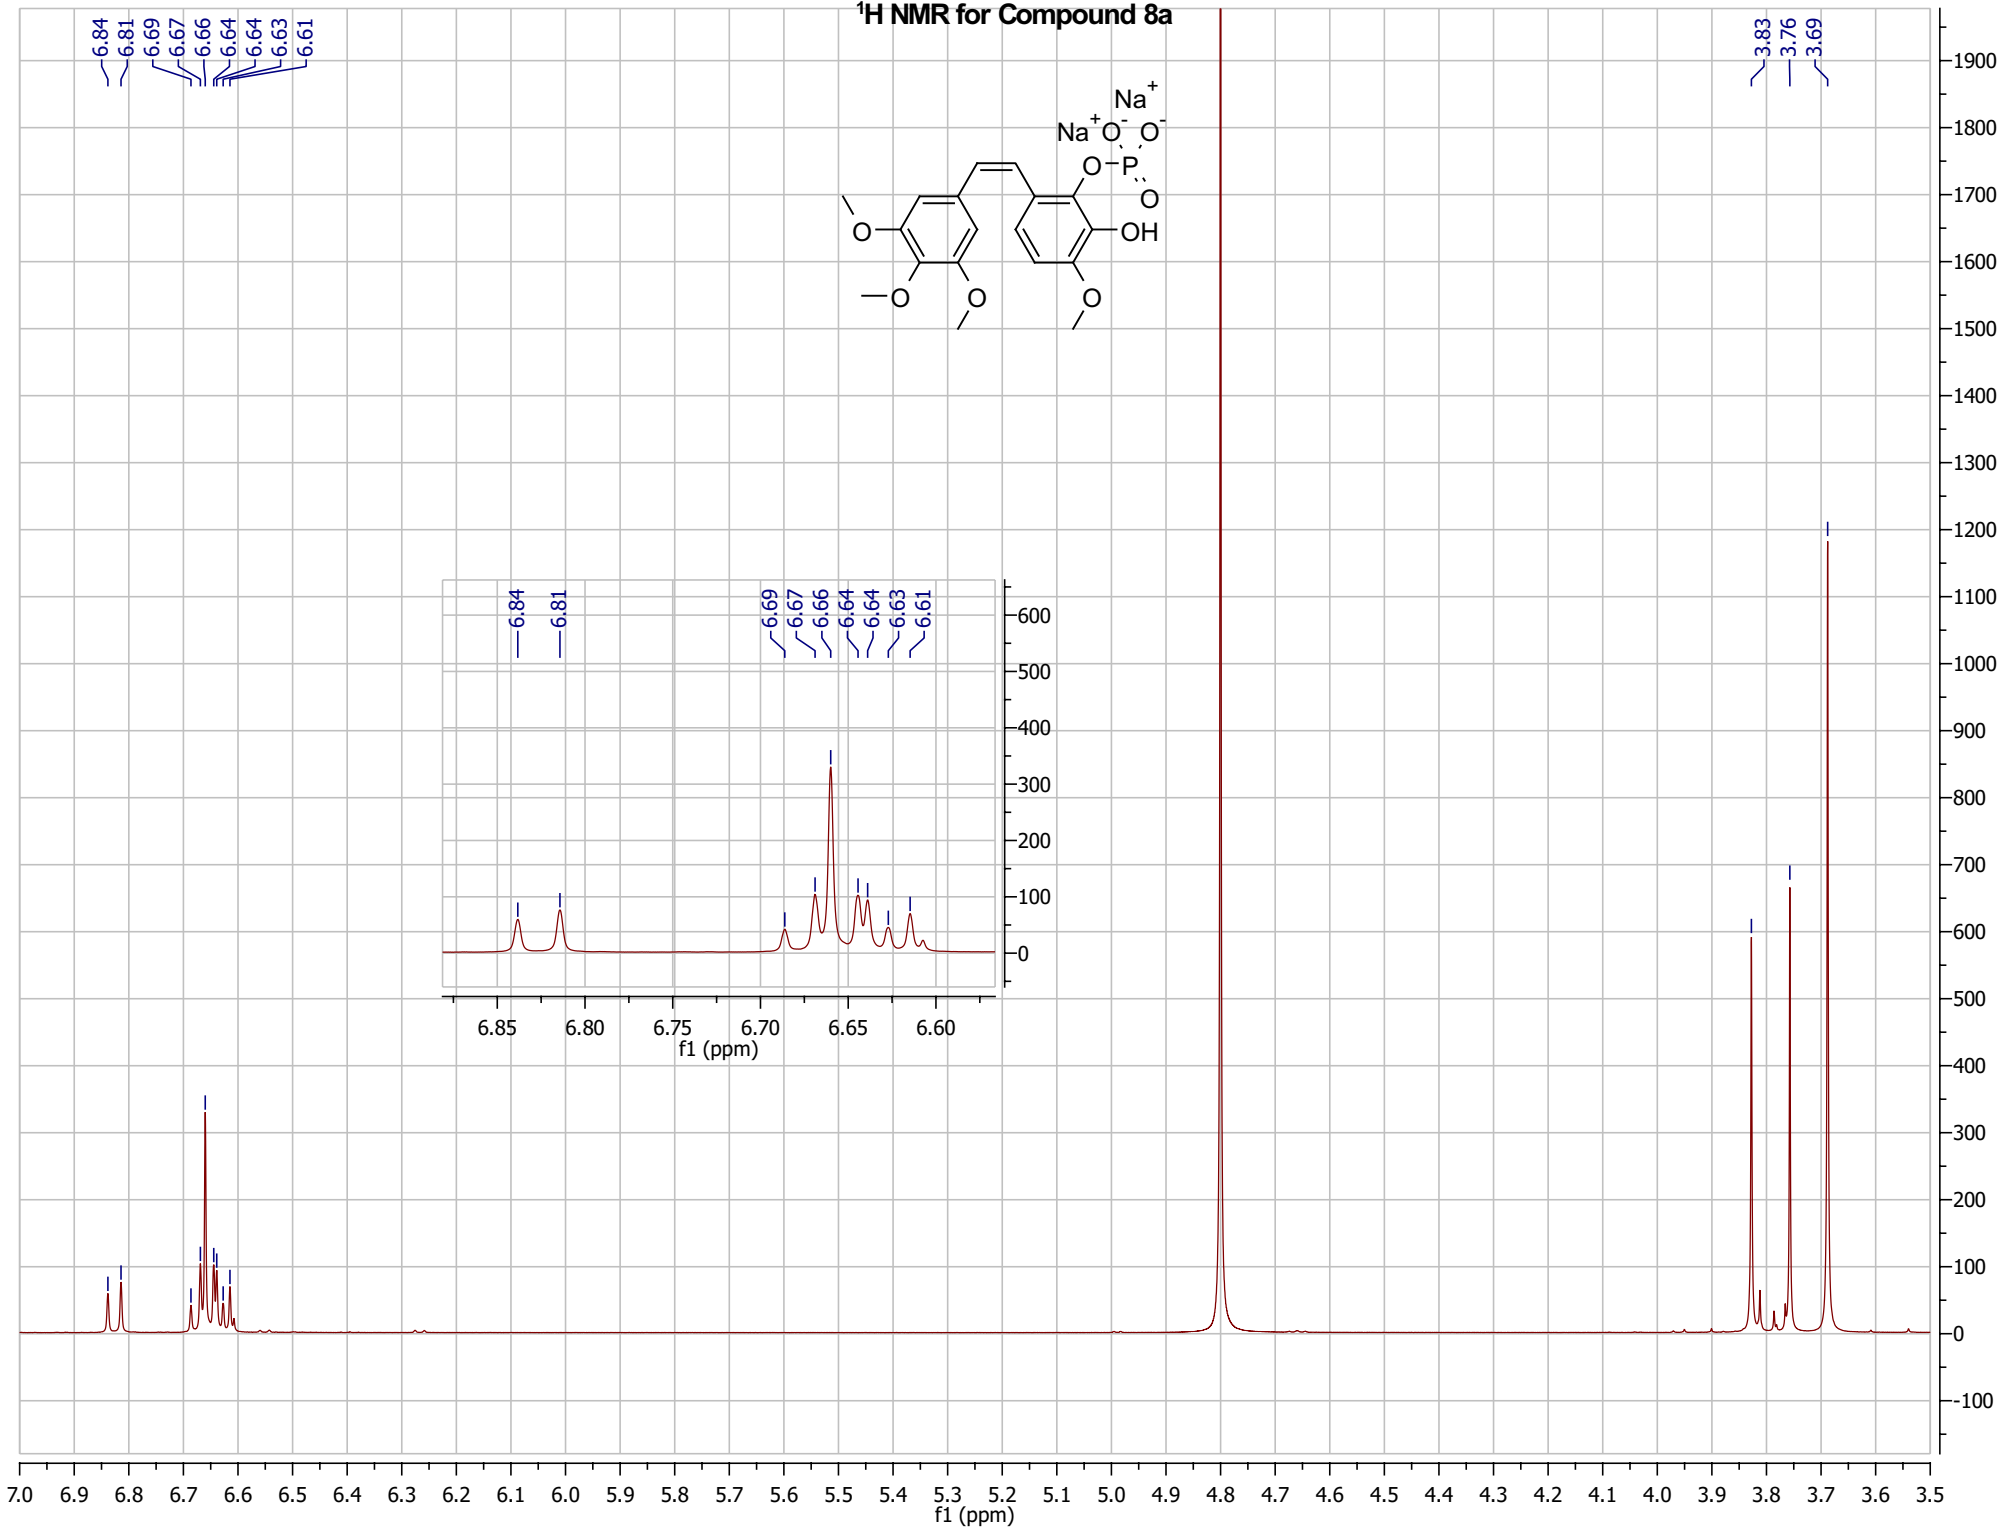

**<sup>1</sup>H NMR for Compound 8b**

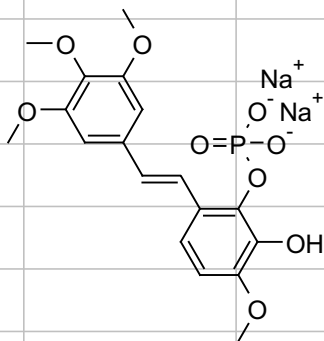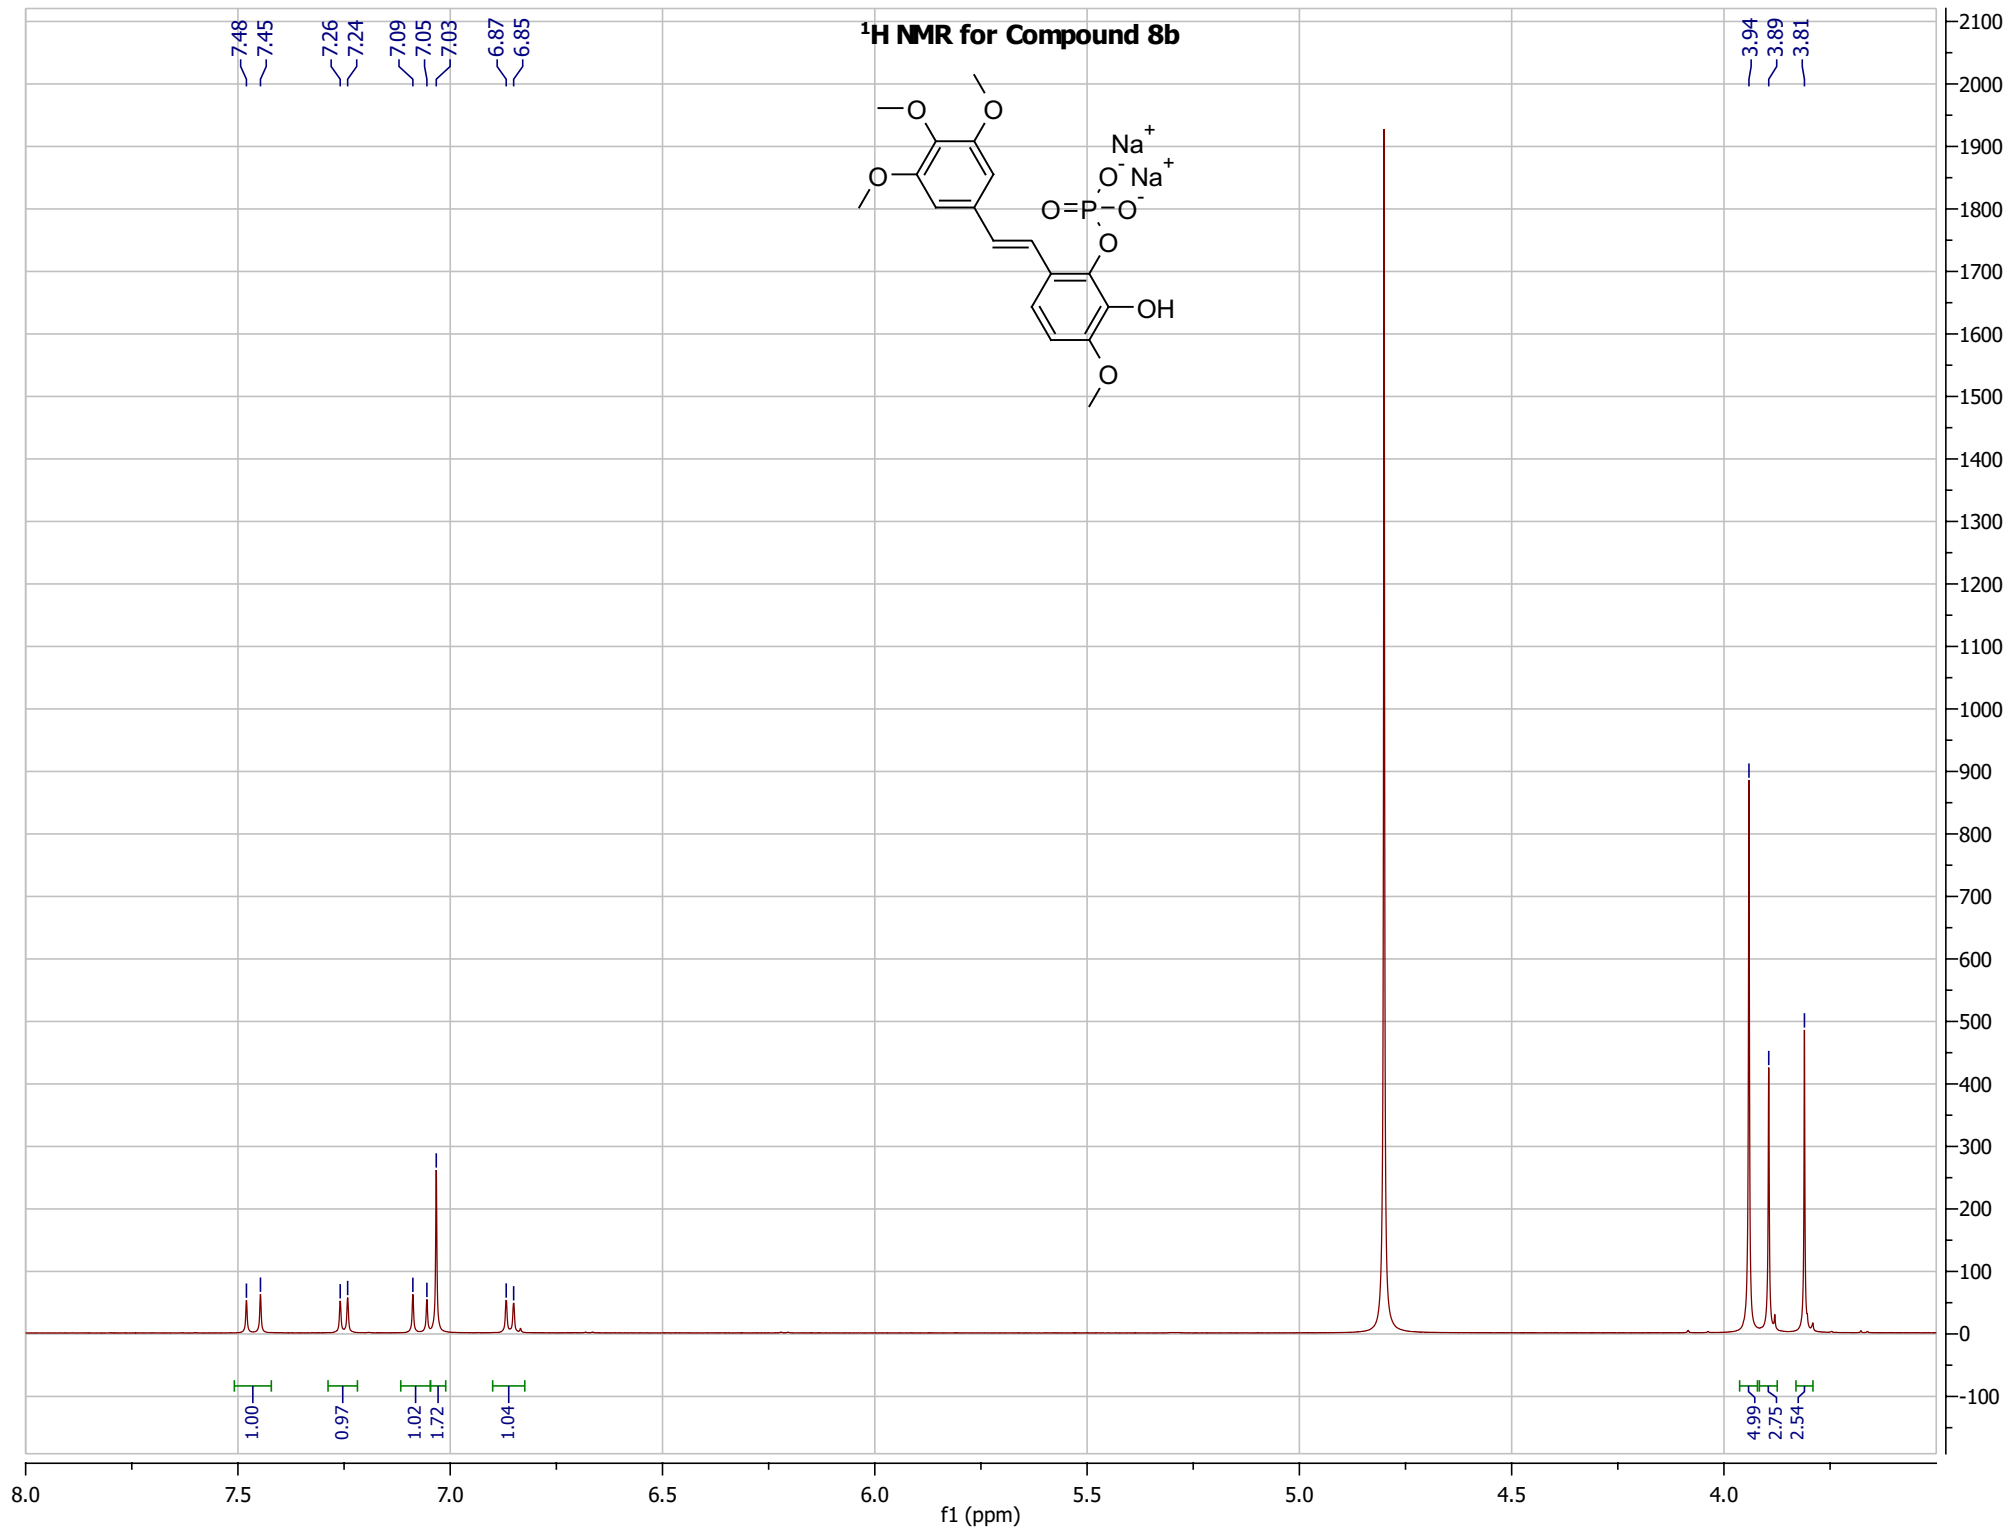

7.48  
7.45  
7.26  
7.24  
7.09  
7.05  
7.03  
6.87  
6.85

3.94  
3.89  
3.81

1.00  
0.97  
1.02  
1.72  
1.04

4.99  
2.75  
2.54

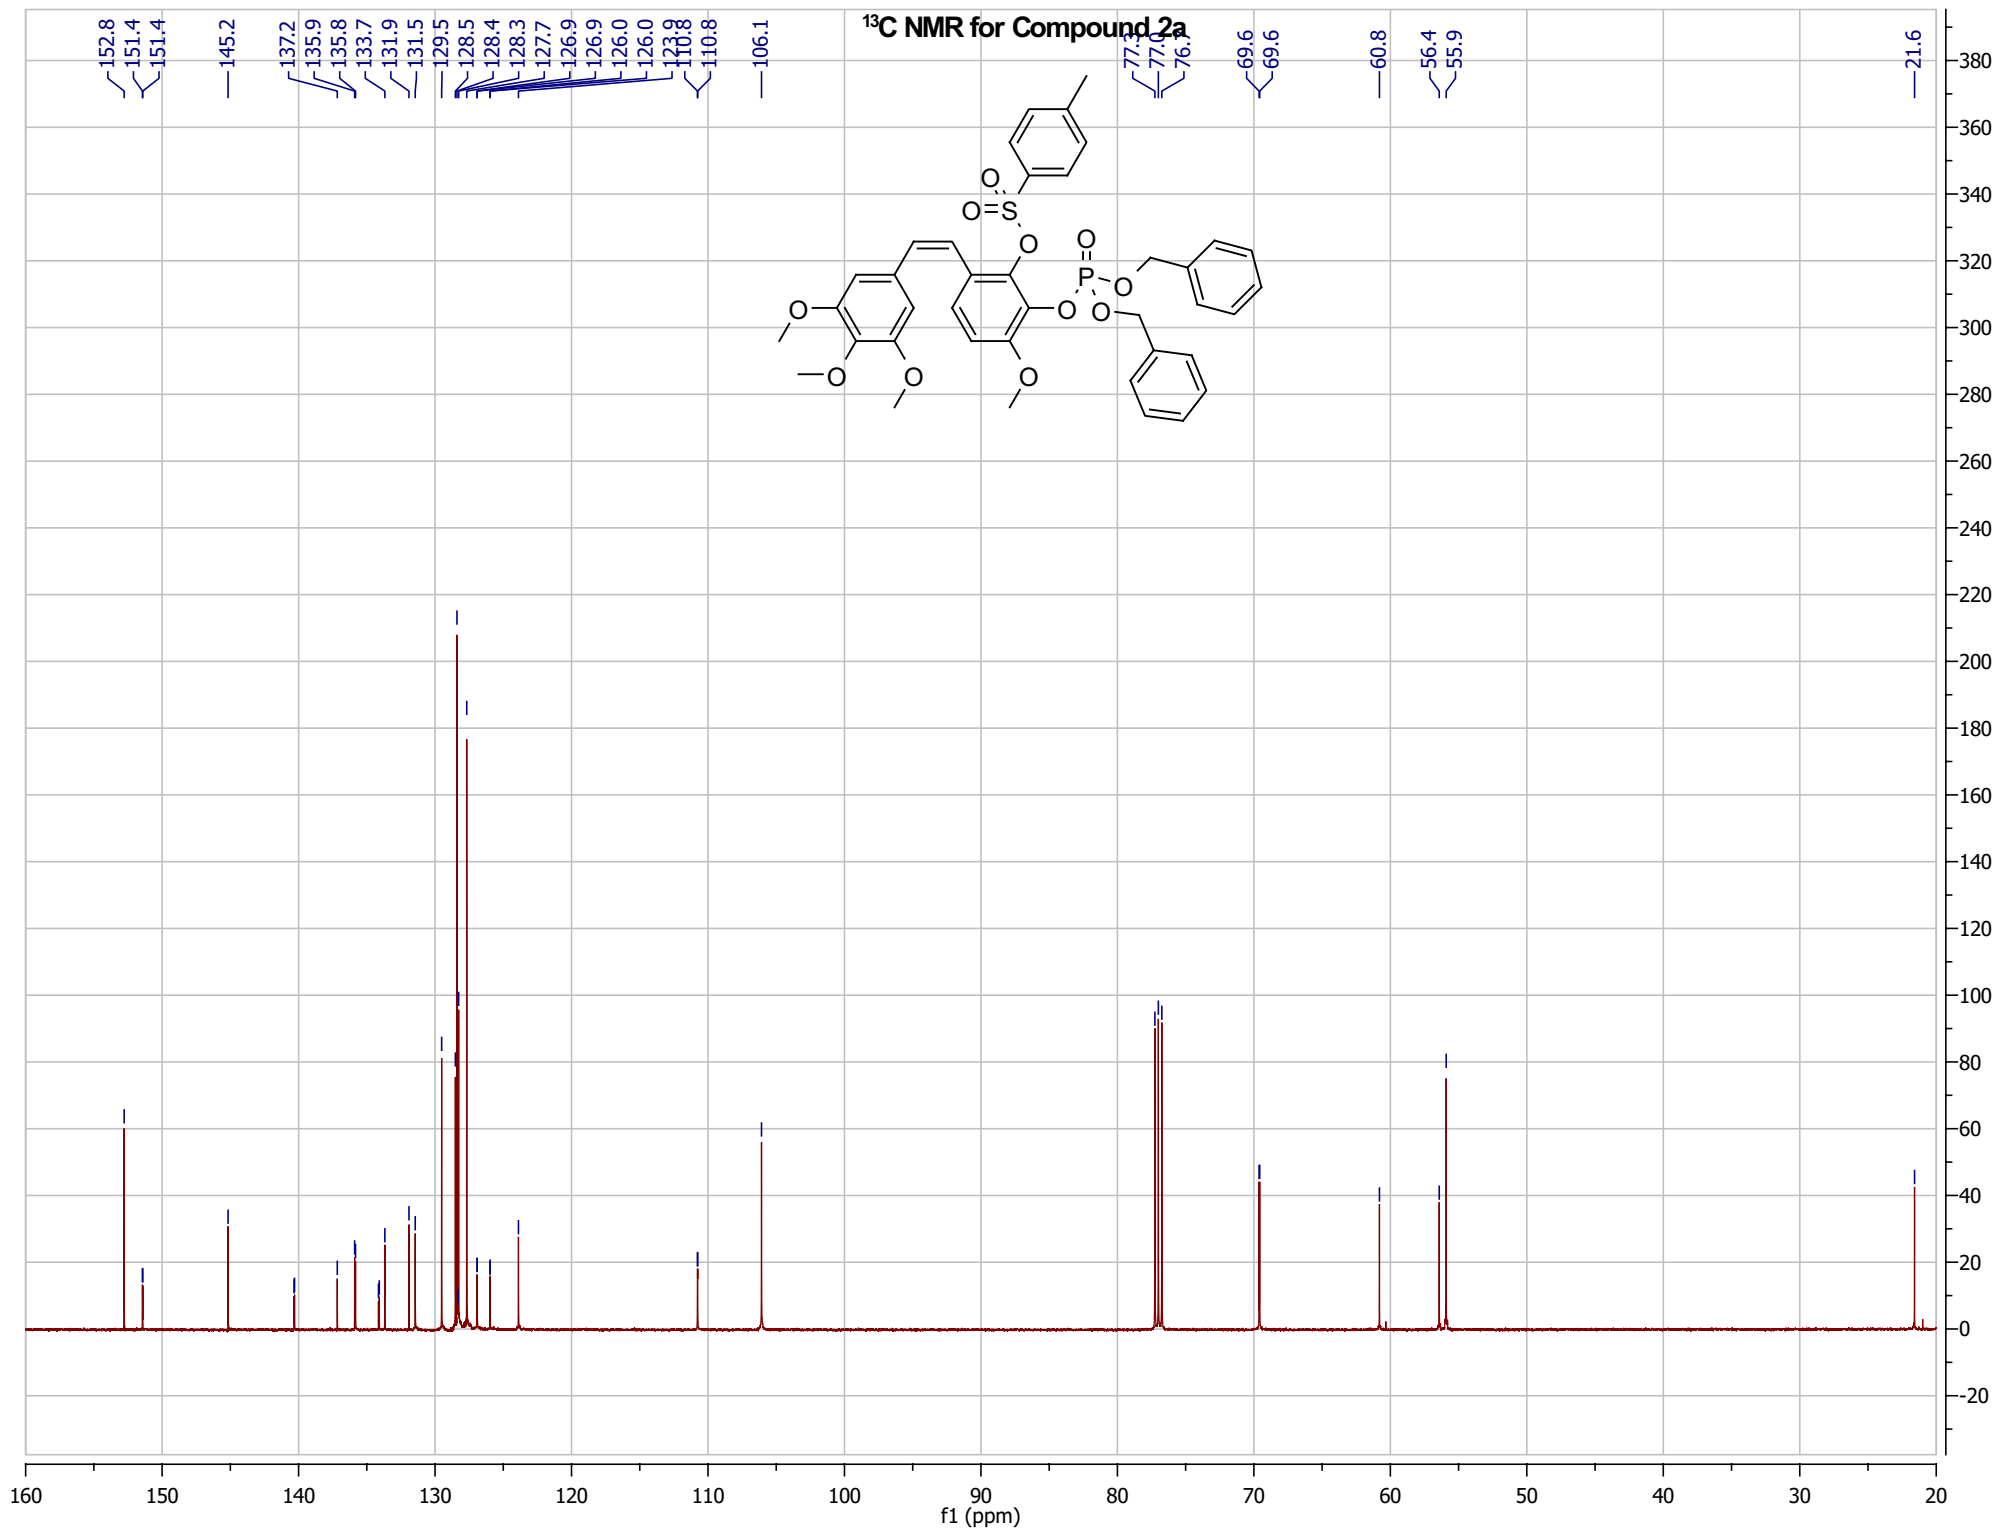

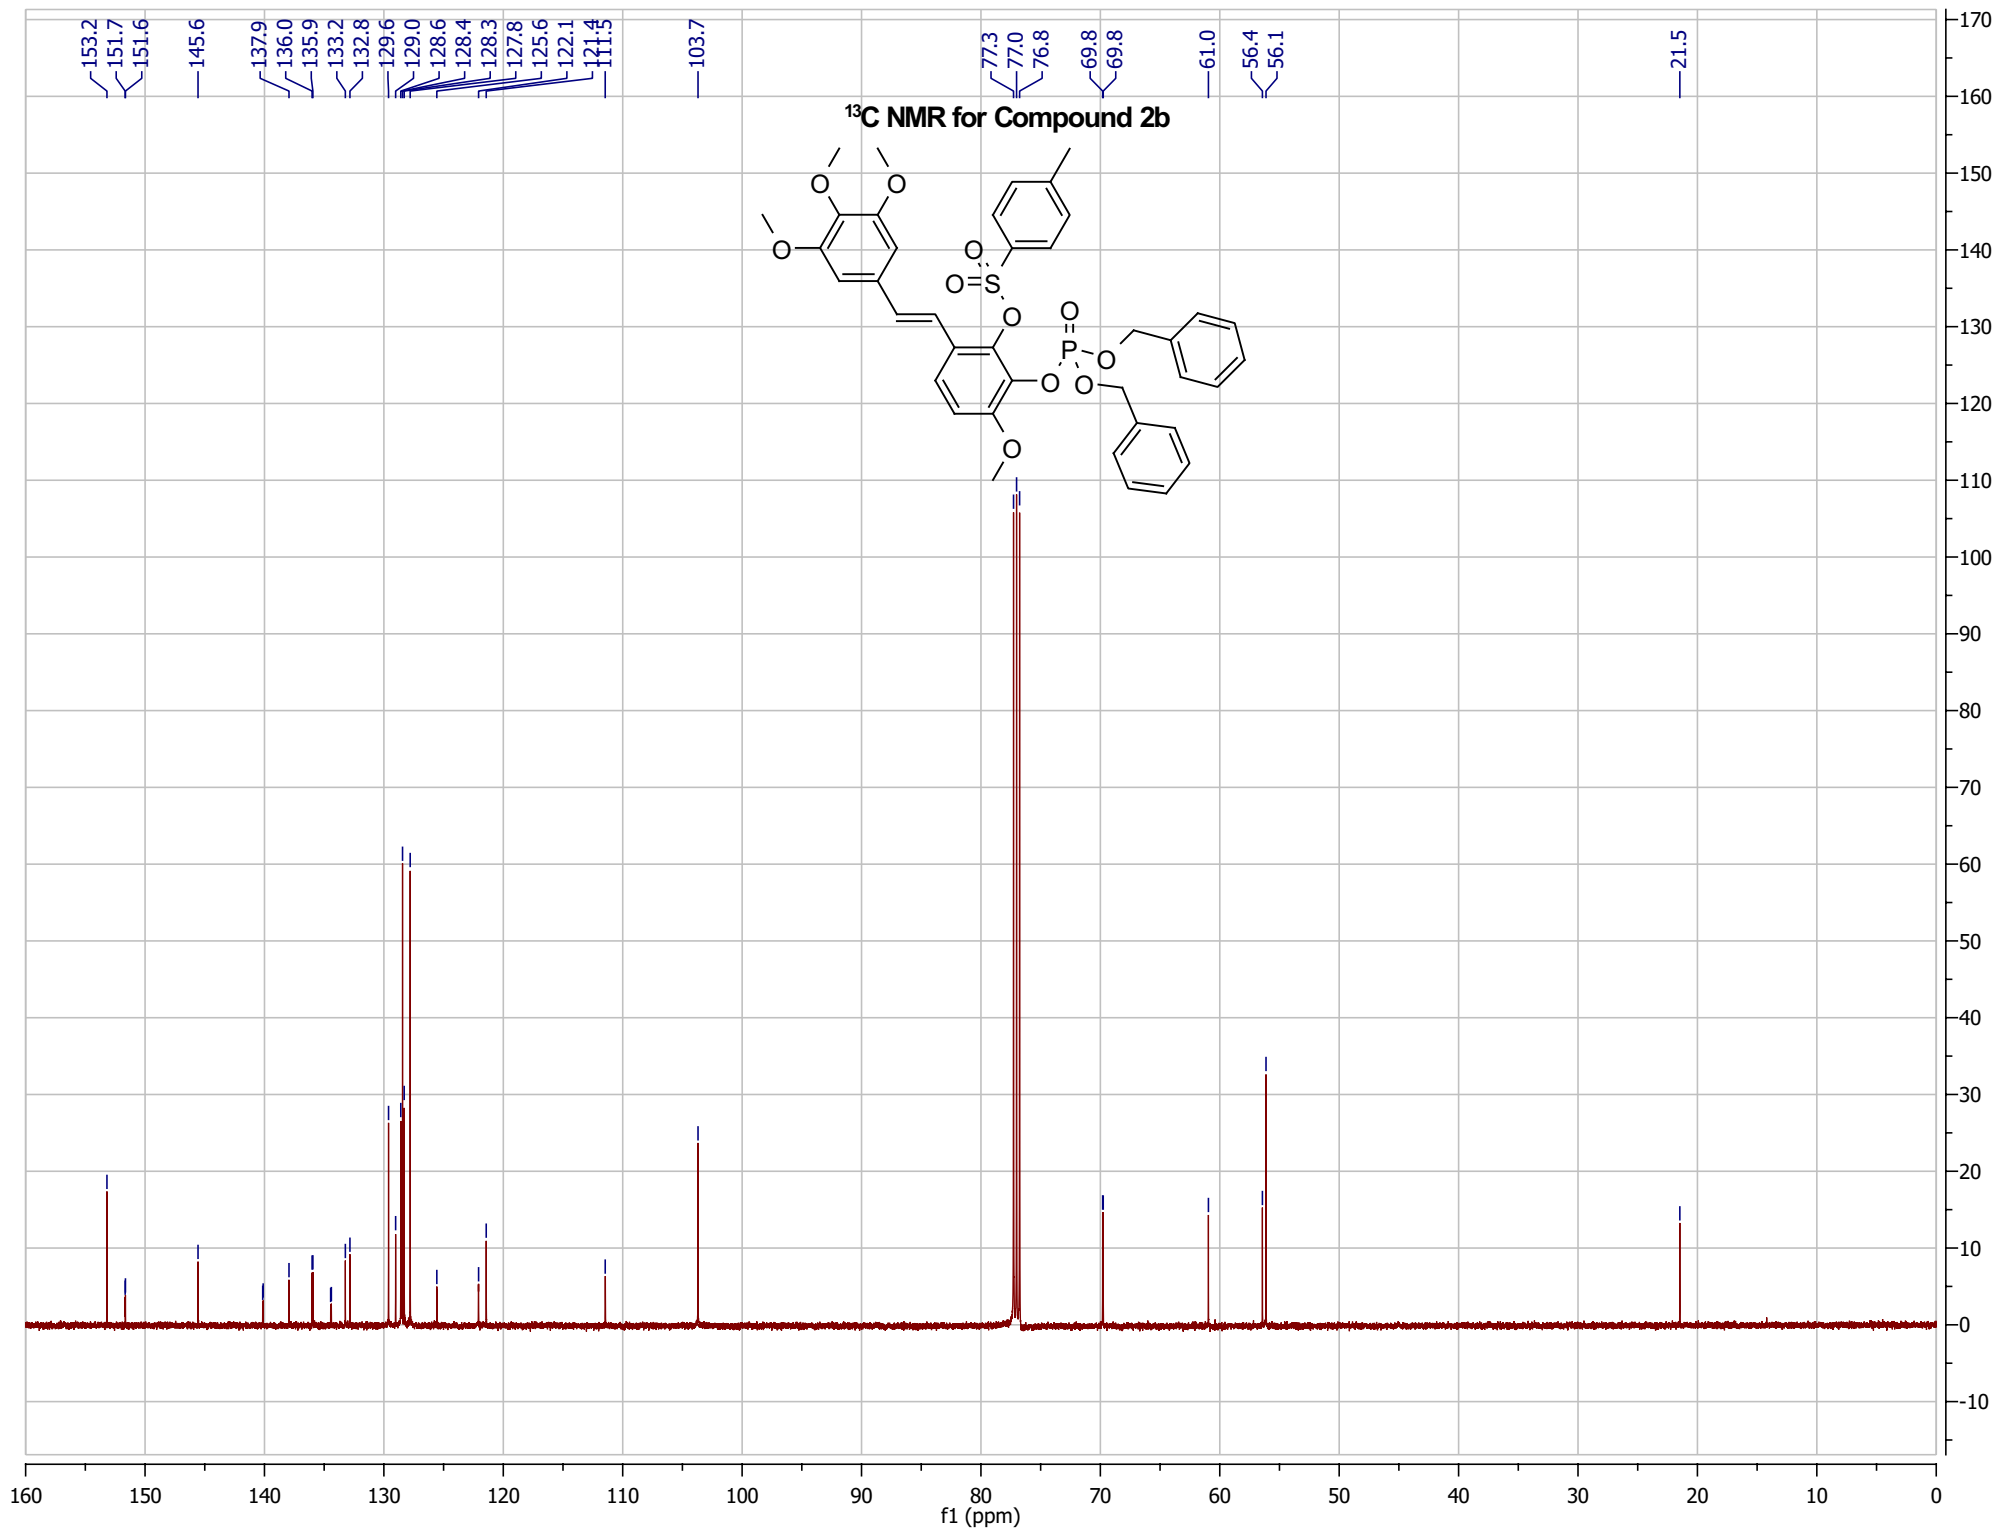

<sup>13</sup>C NMR for Compound 3a

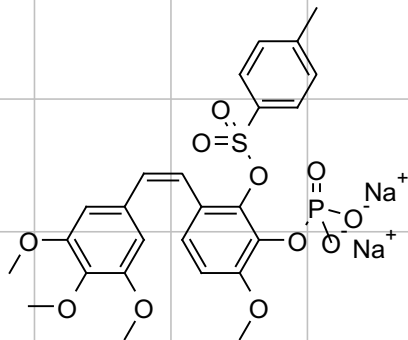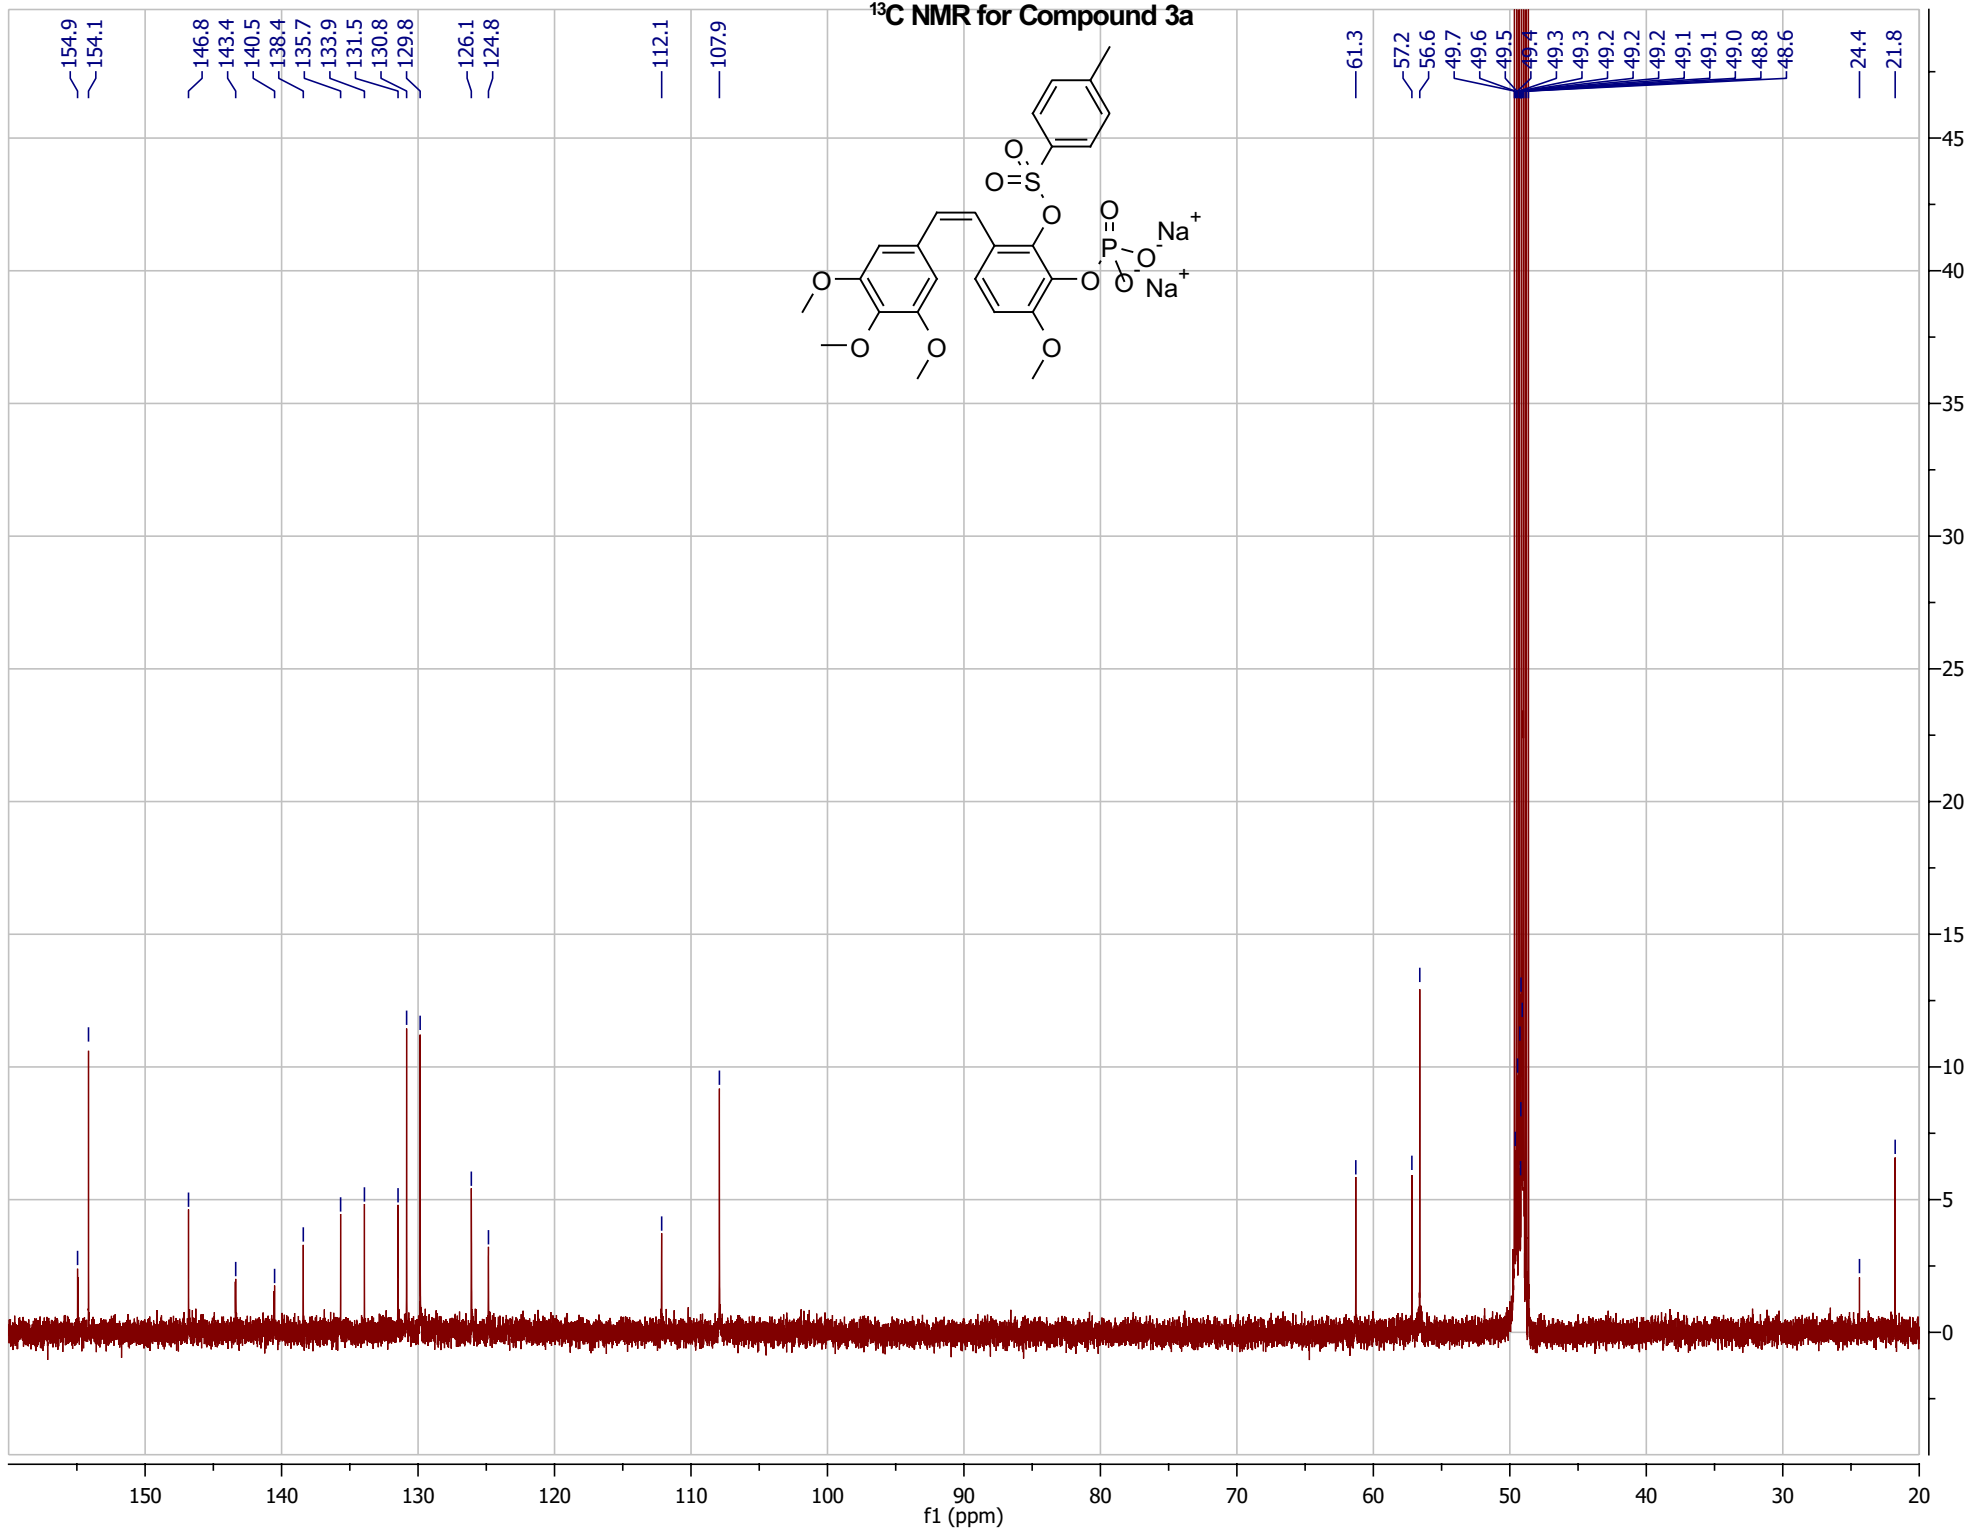

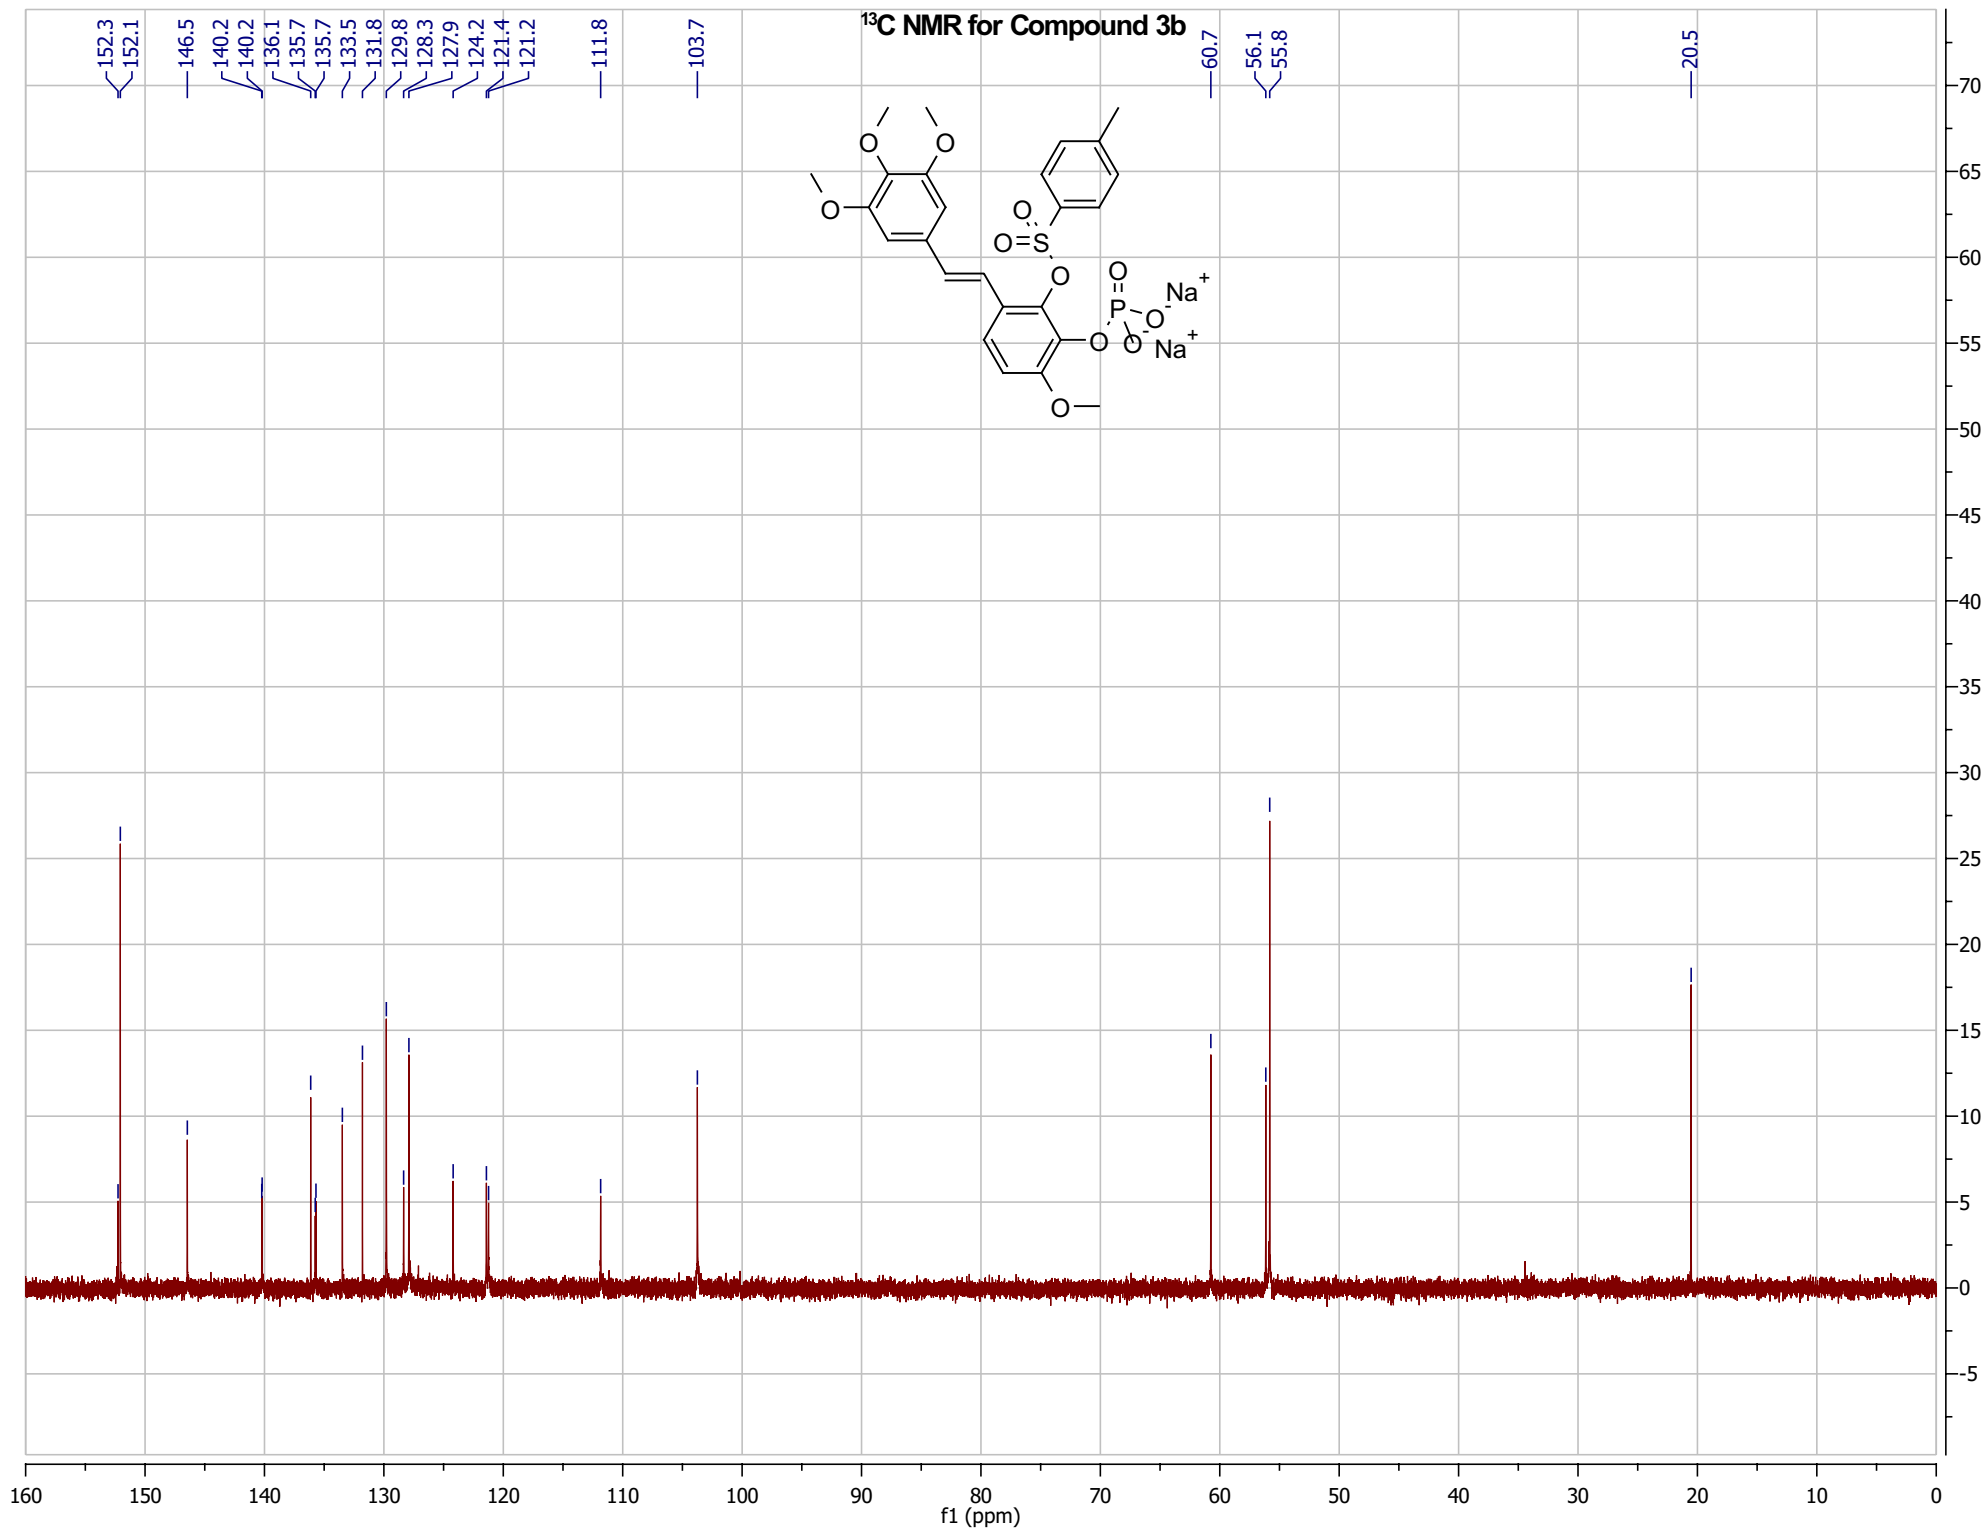



<sup>13</sup>C NMR for Compound 4a

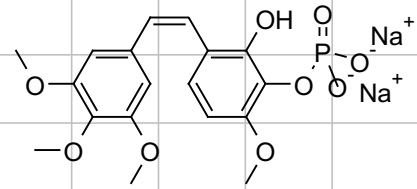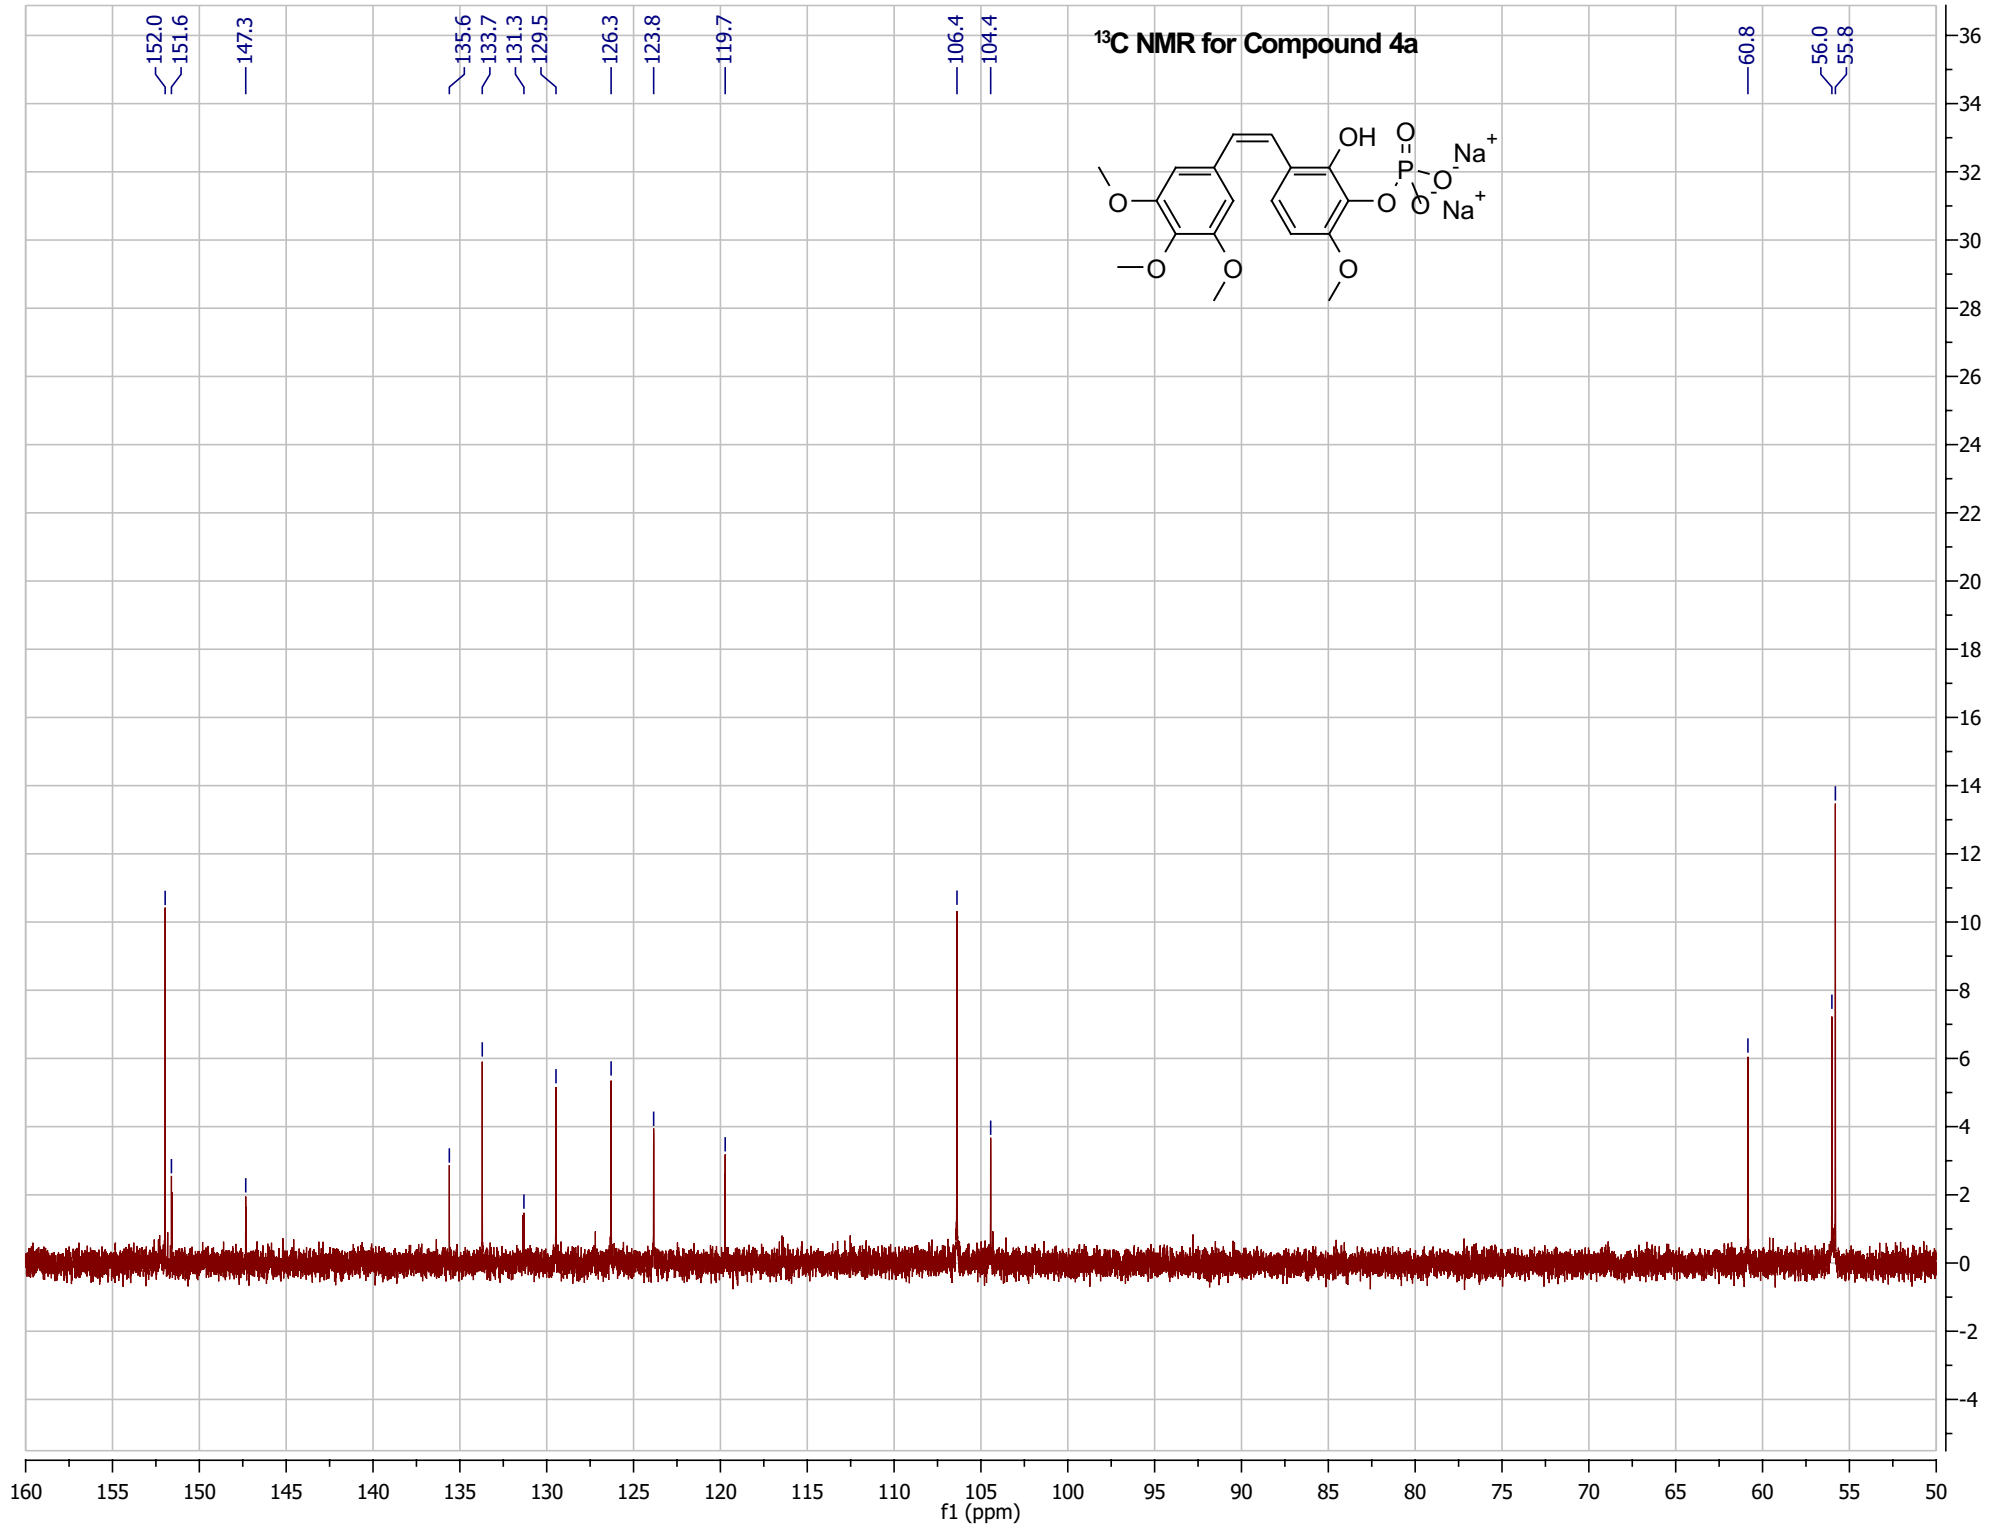

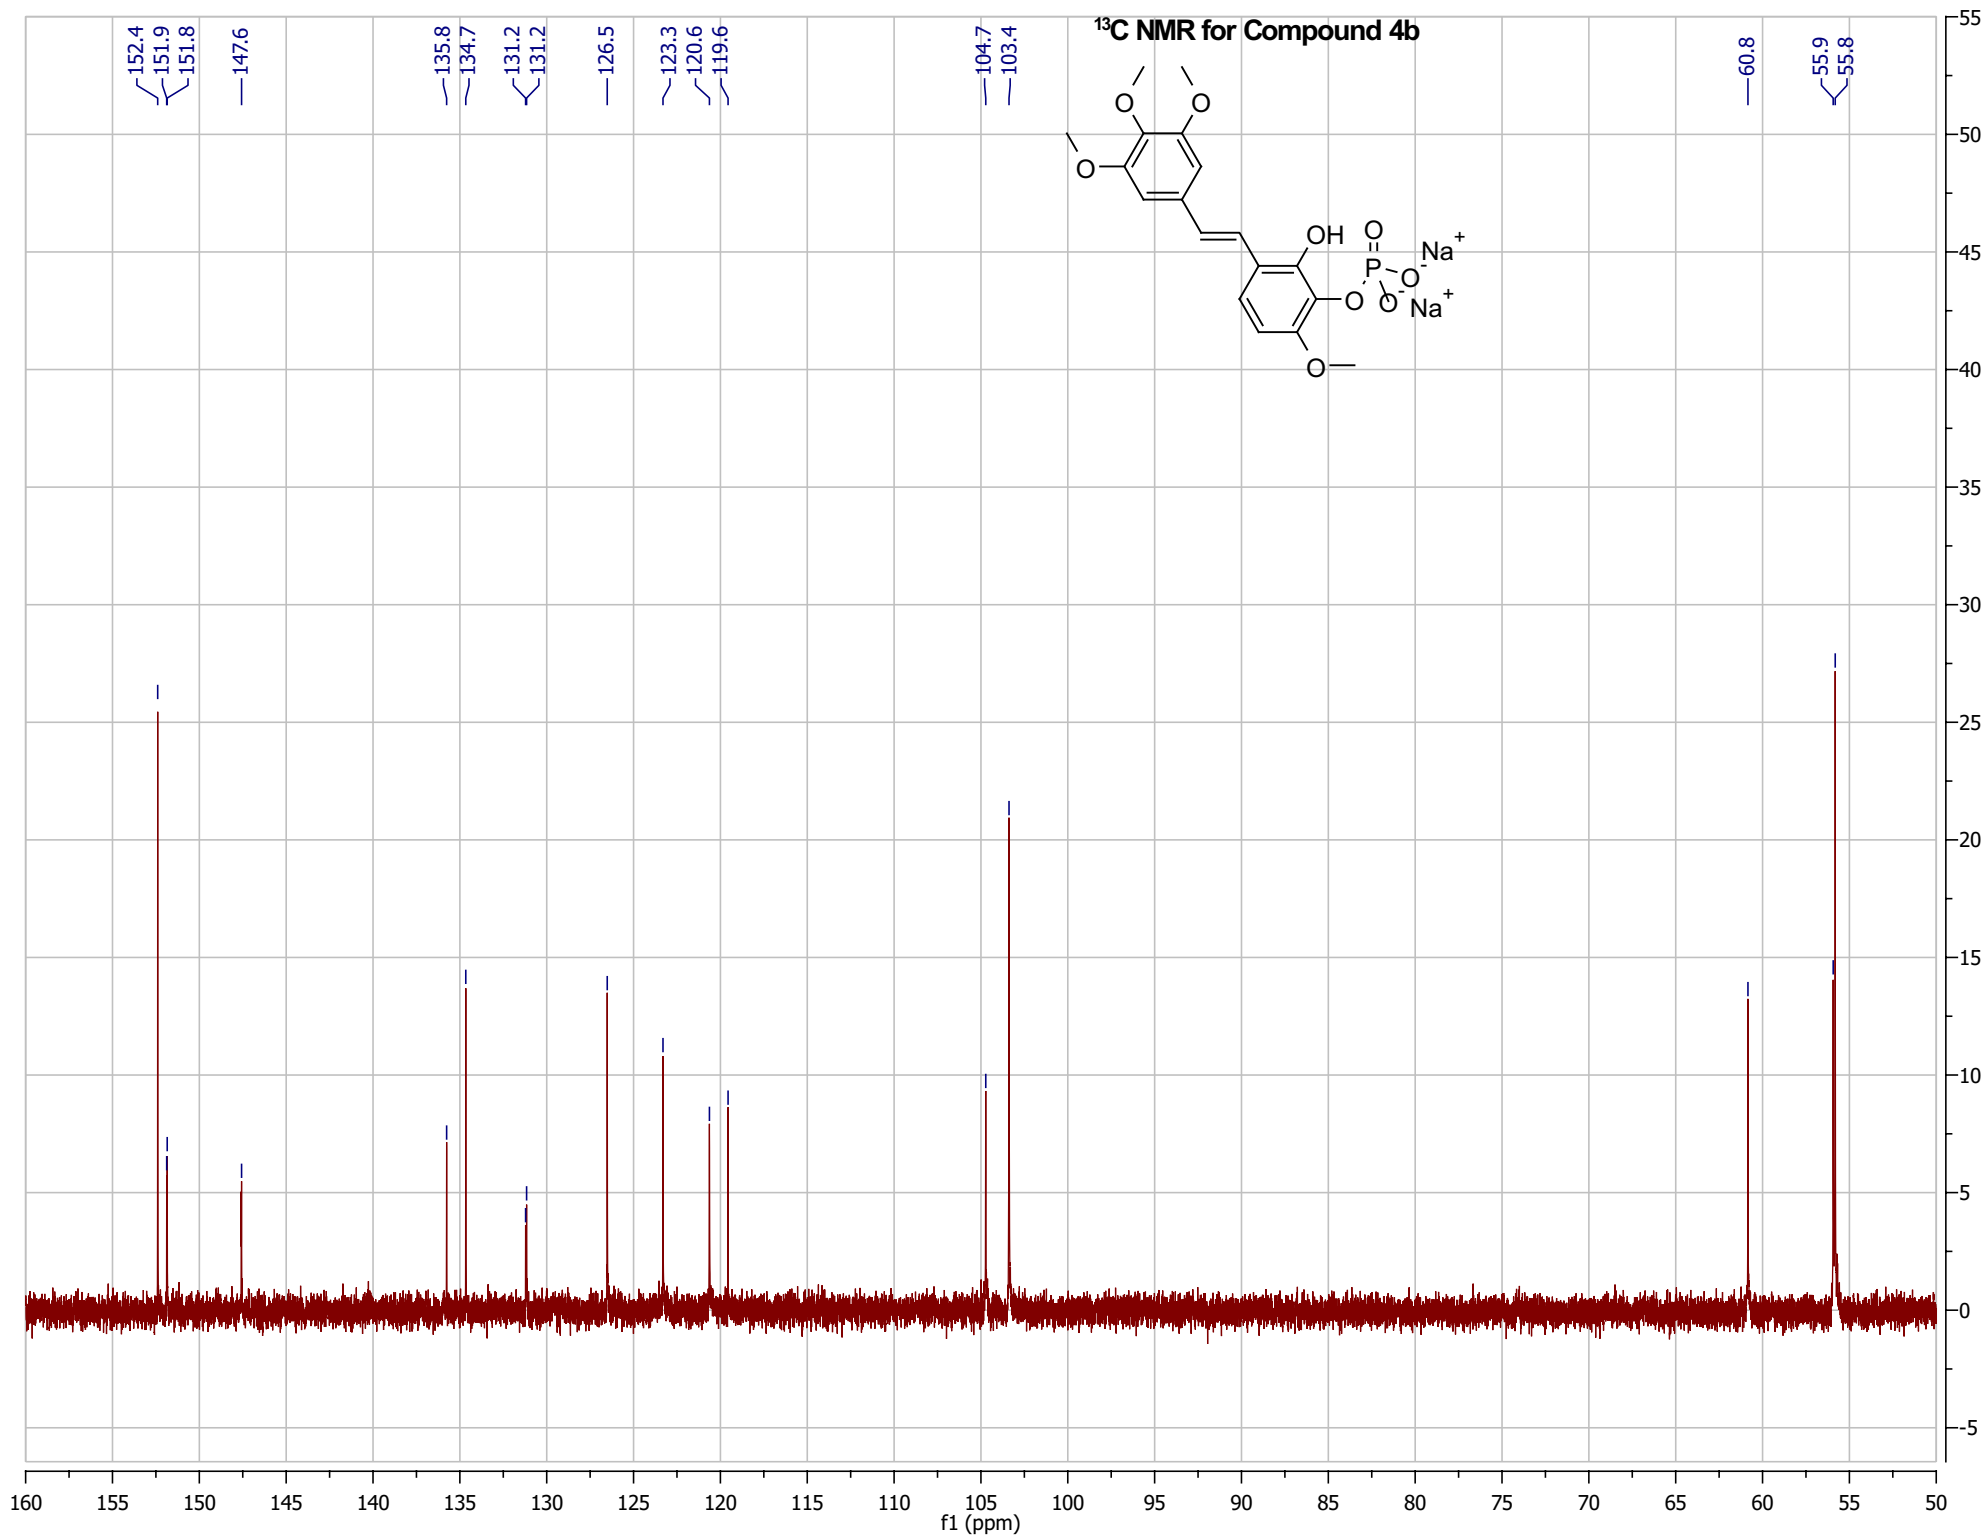

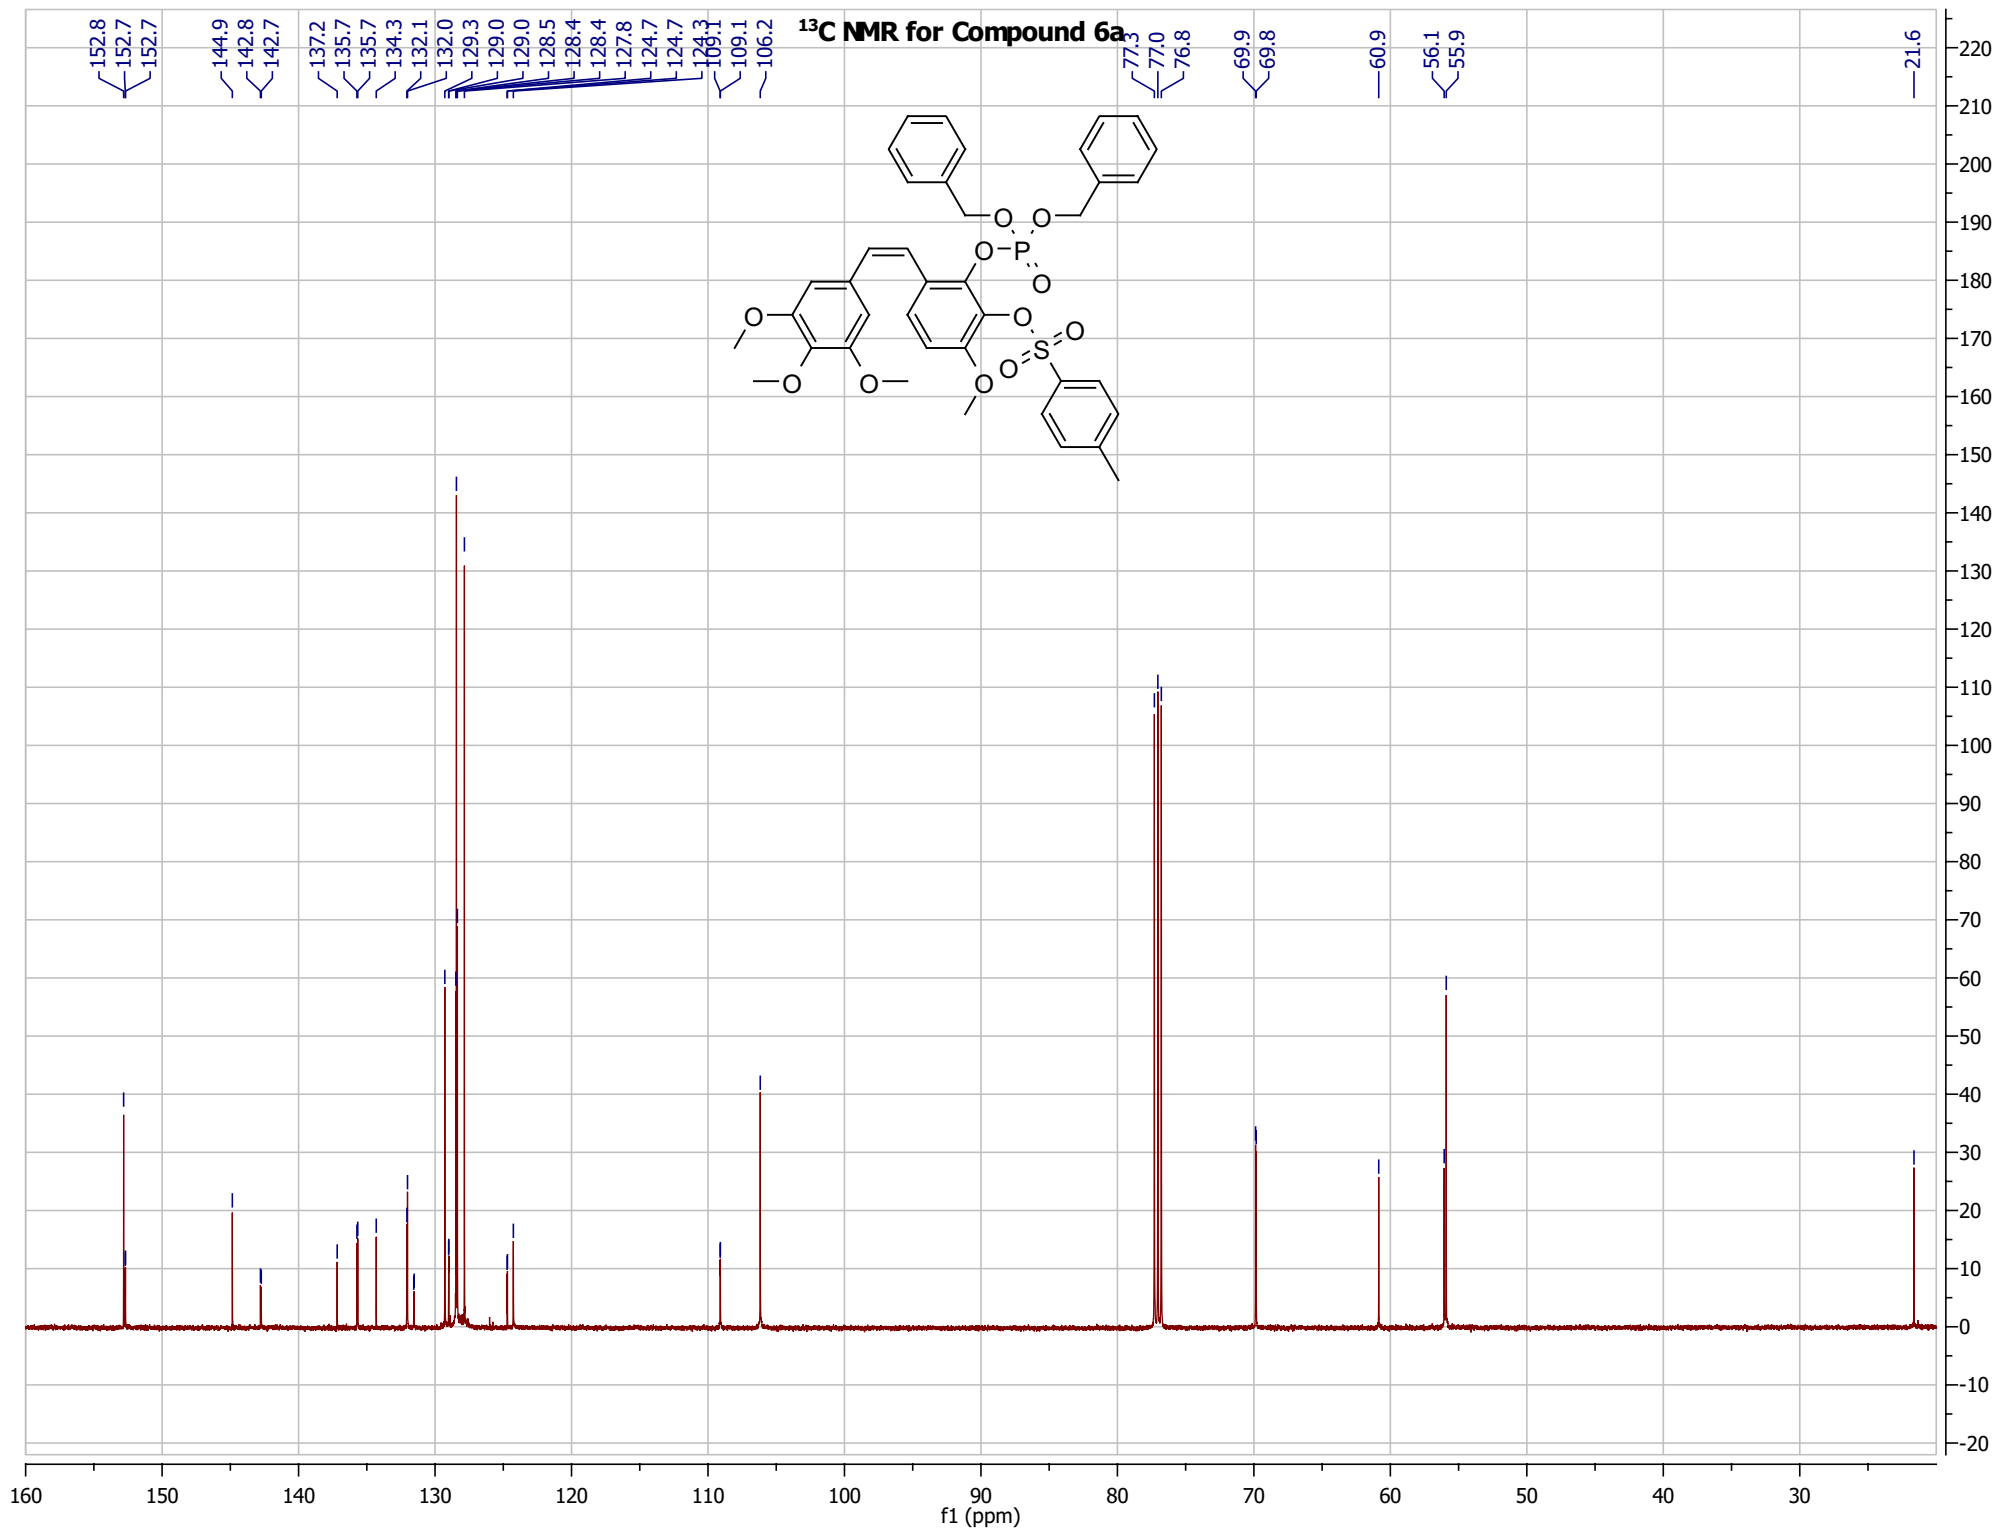

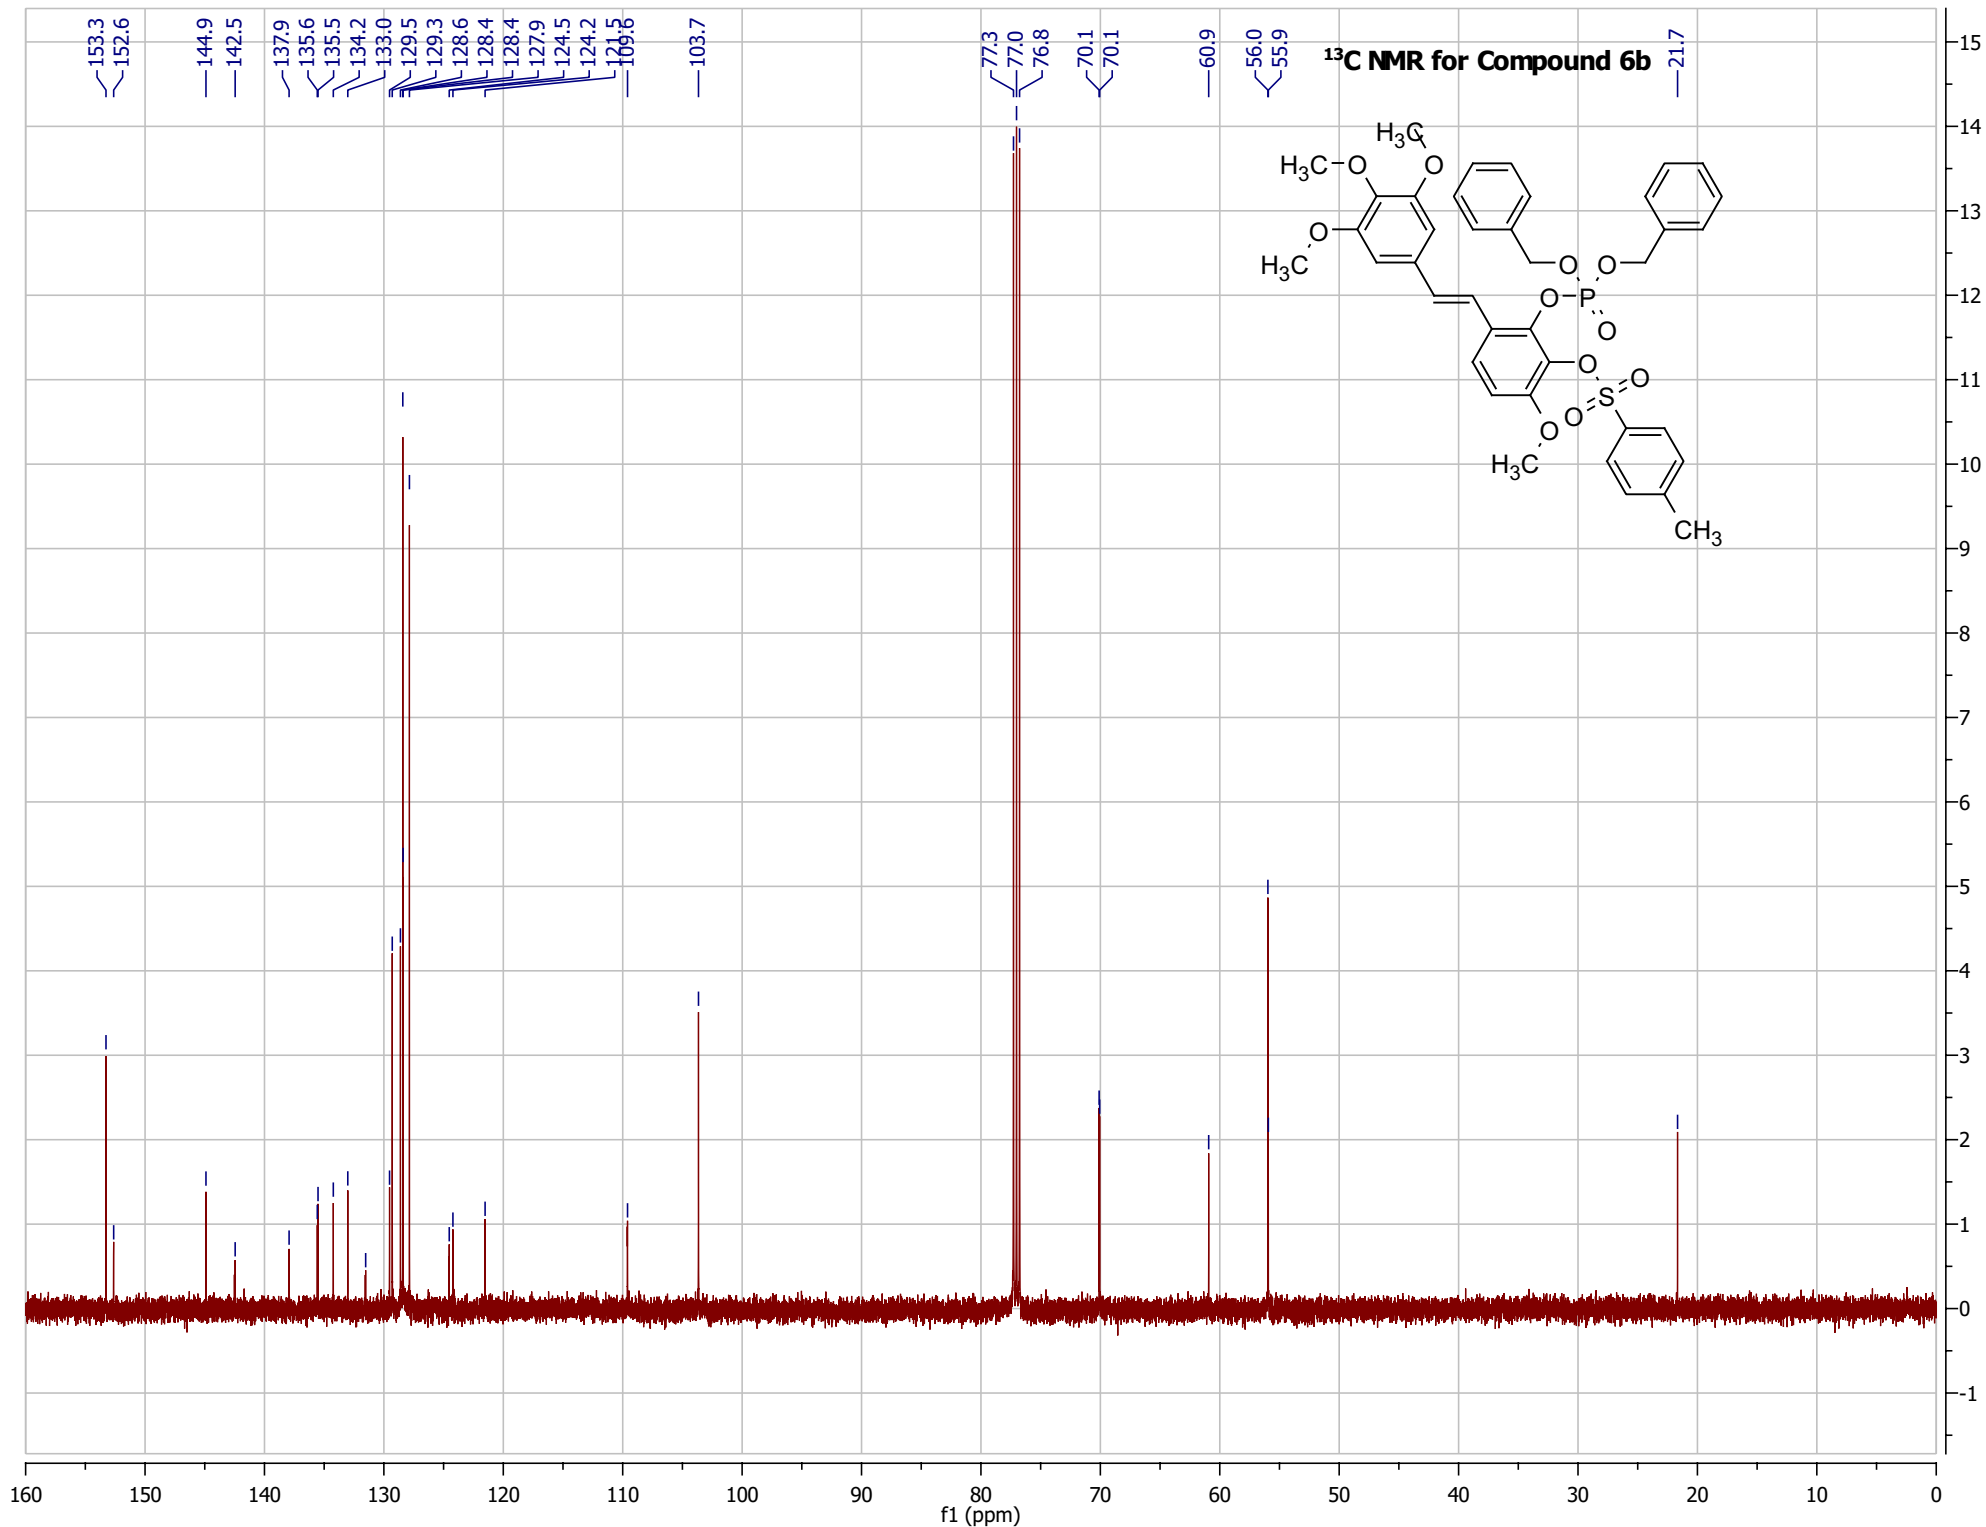

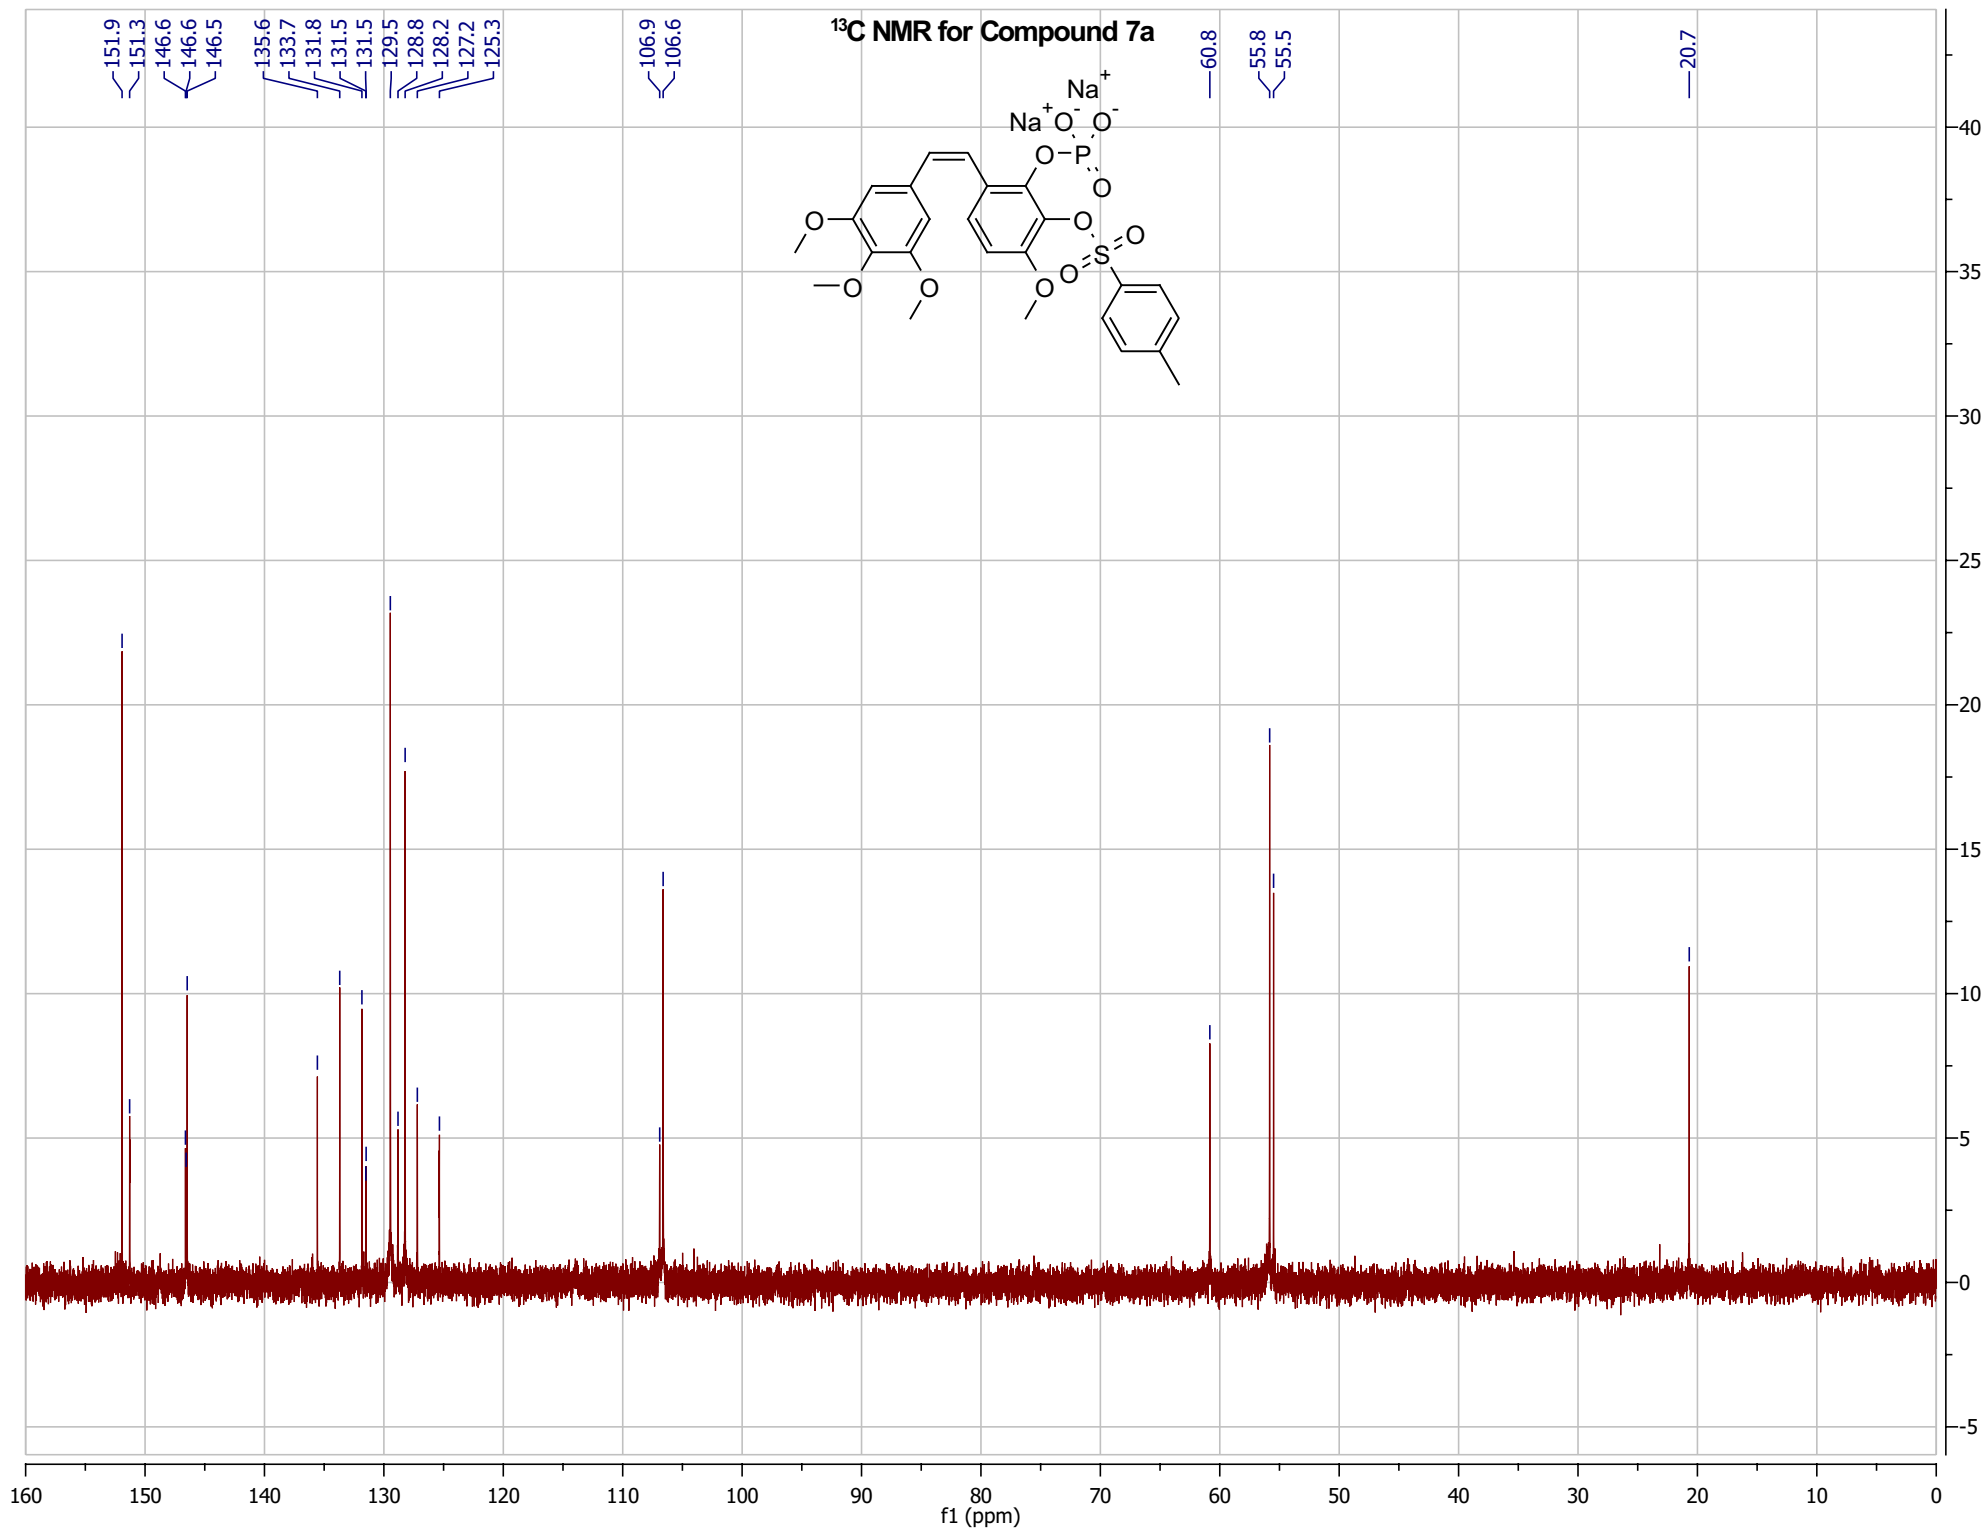

Carbon: 001

<sup>13</sup>C NMR for Compound 7b

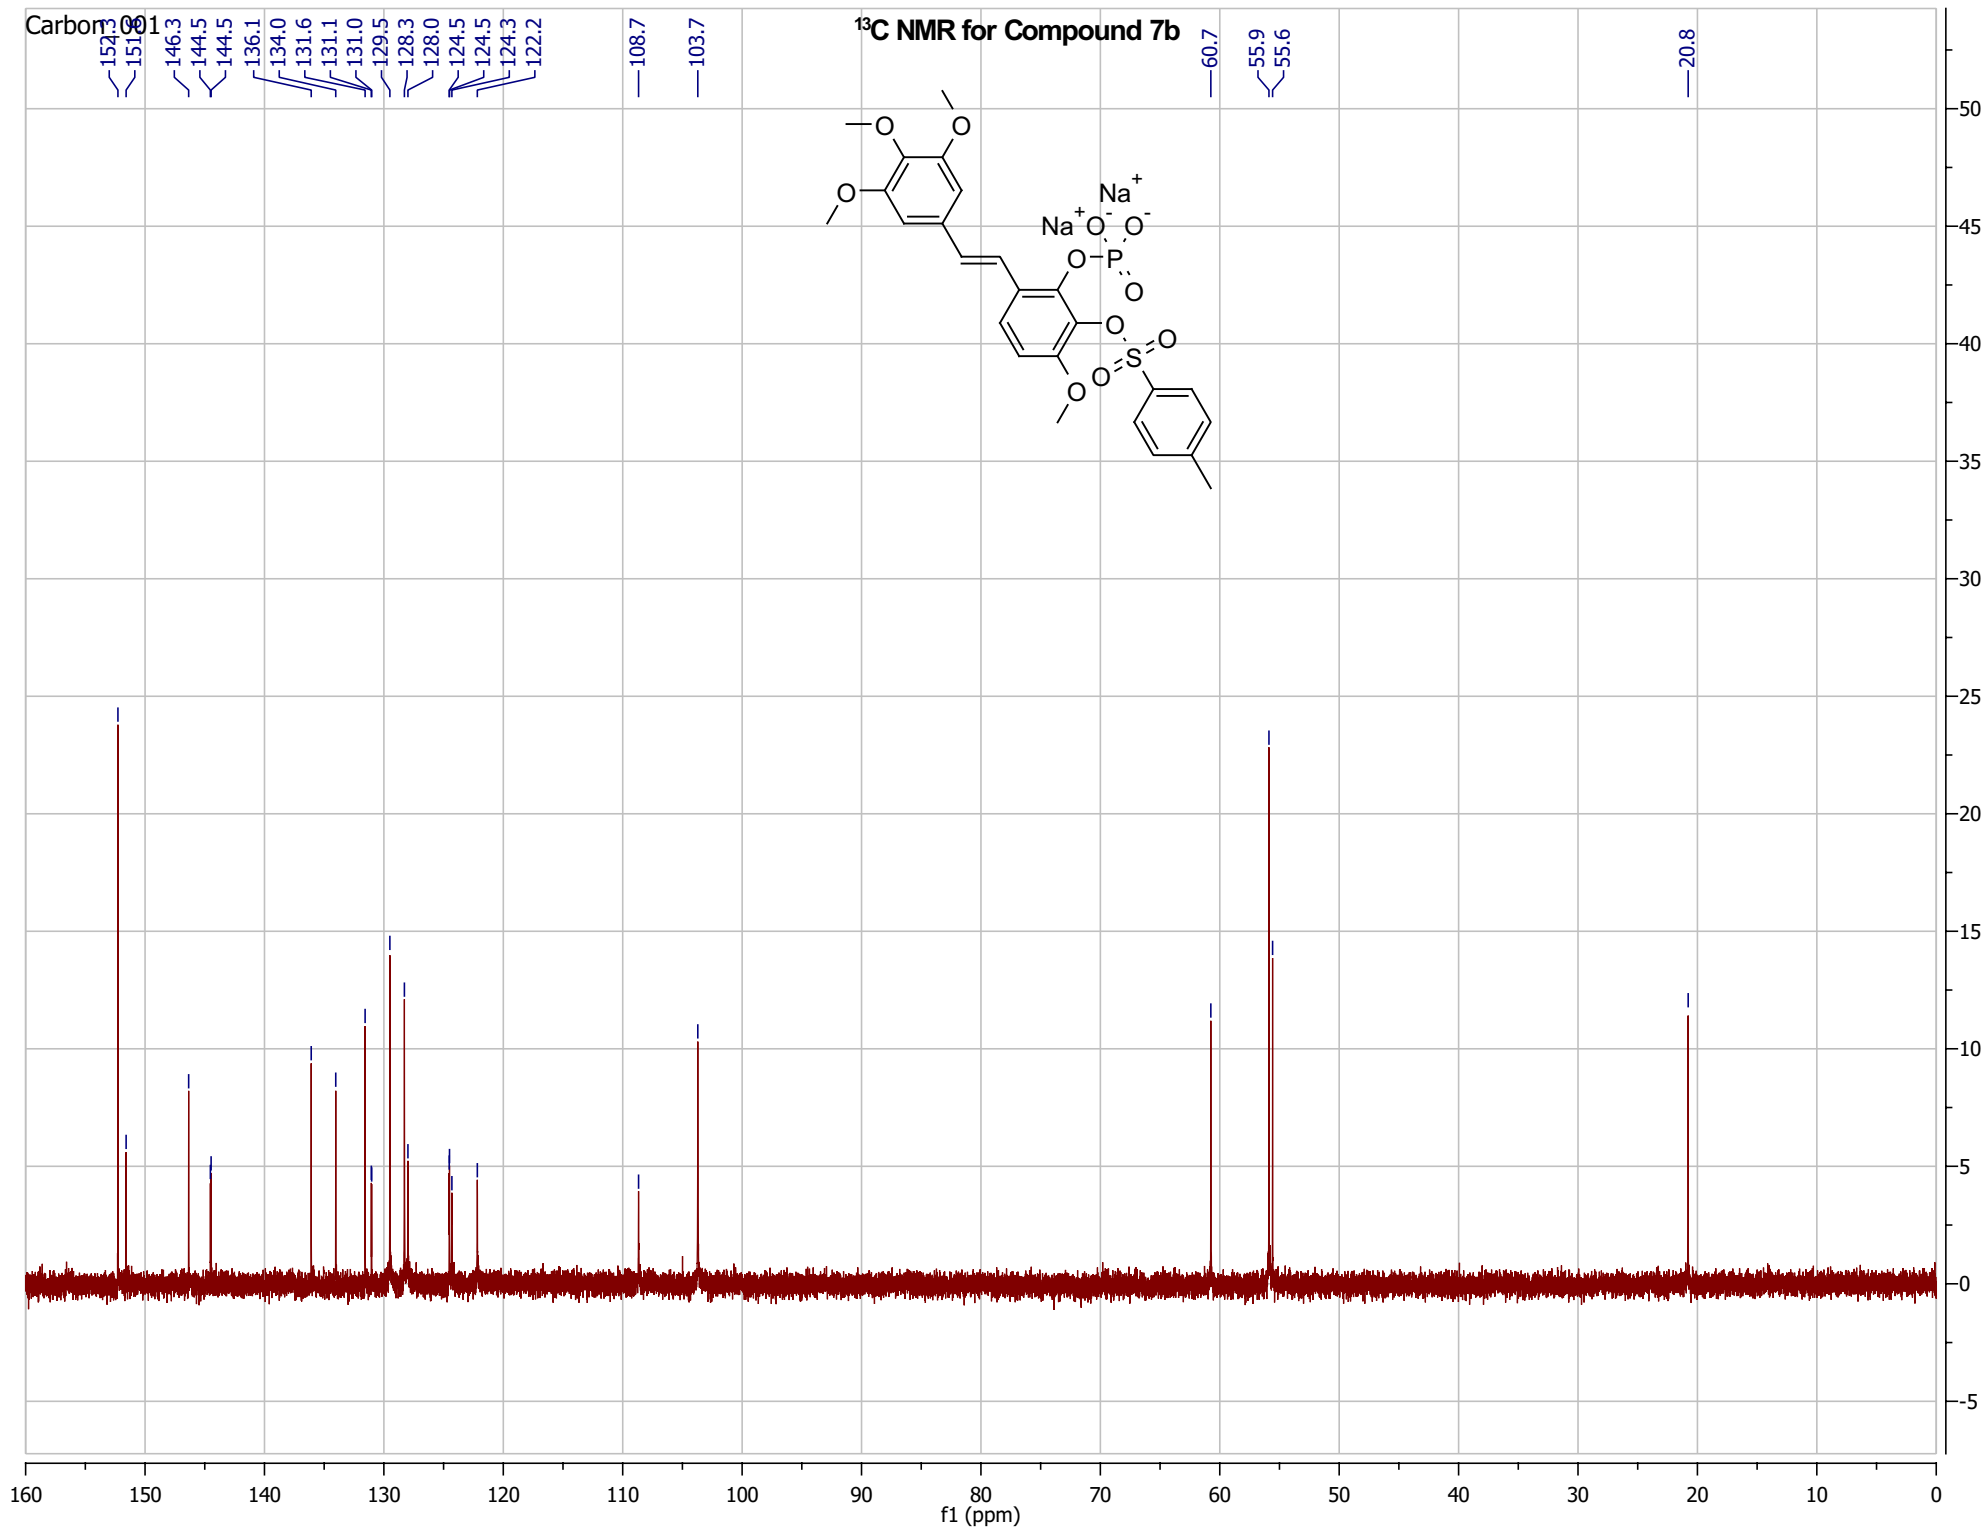

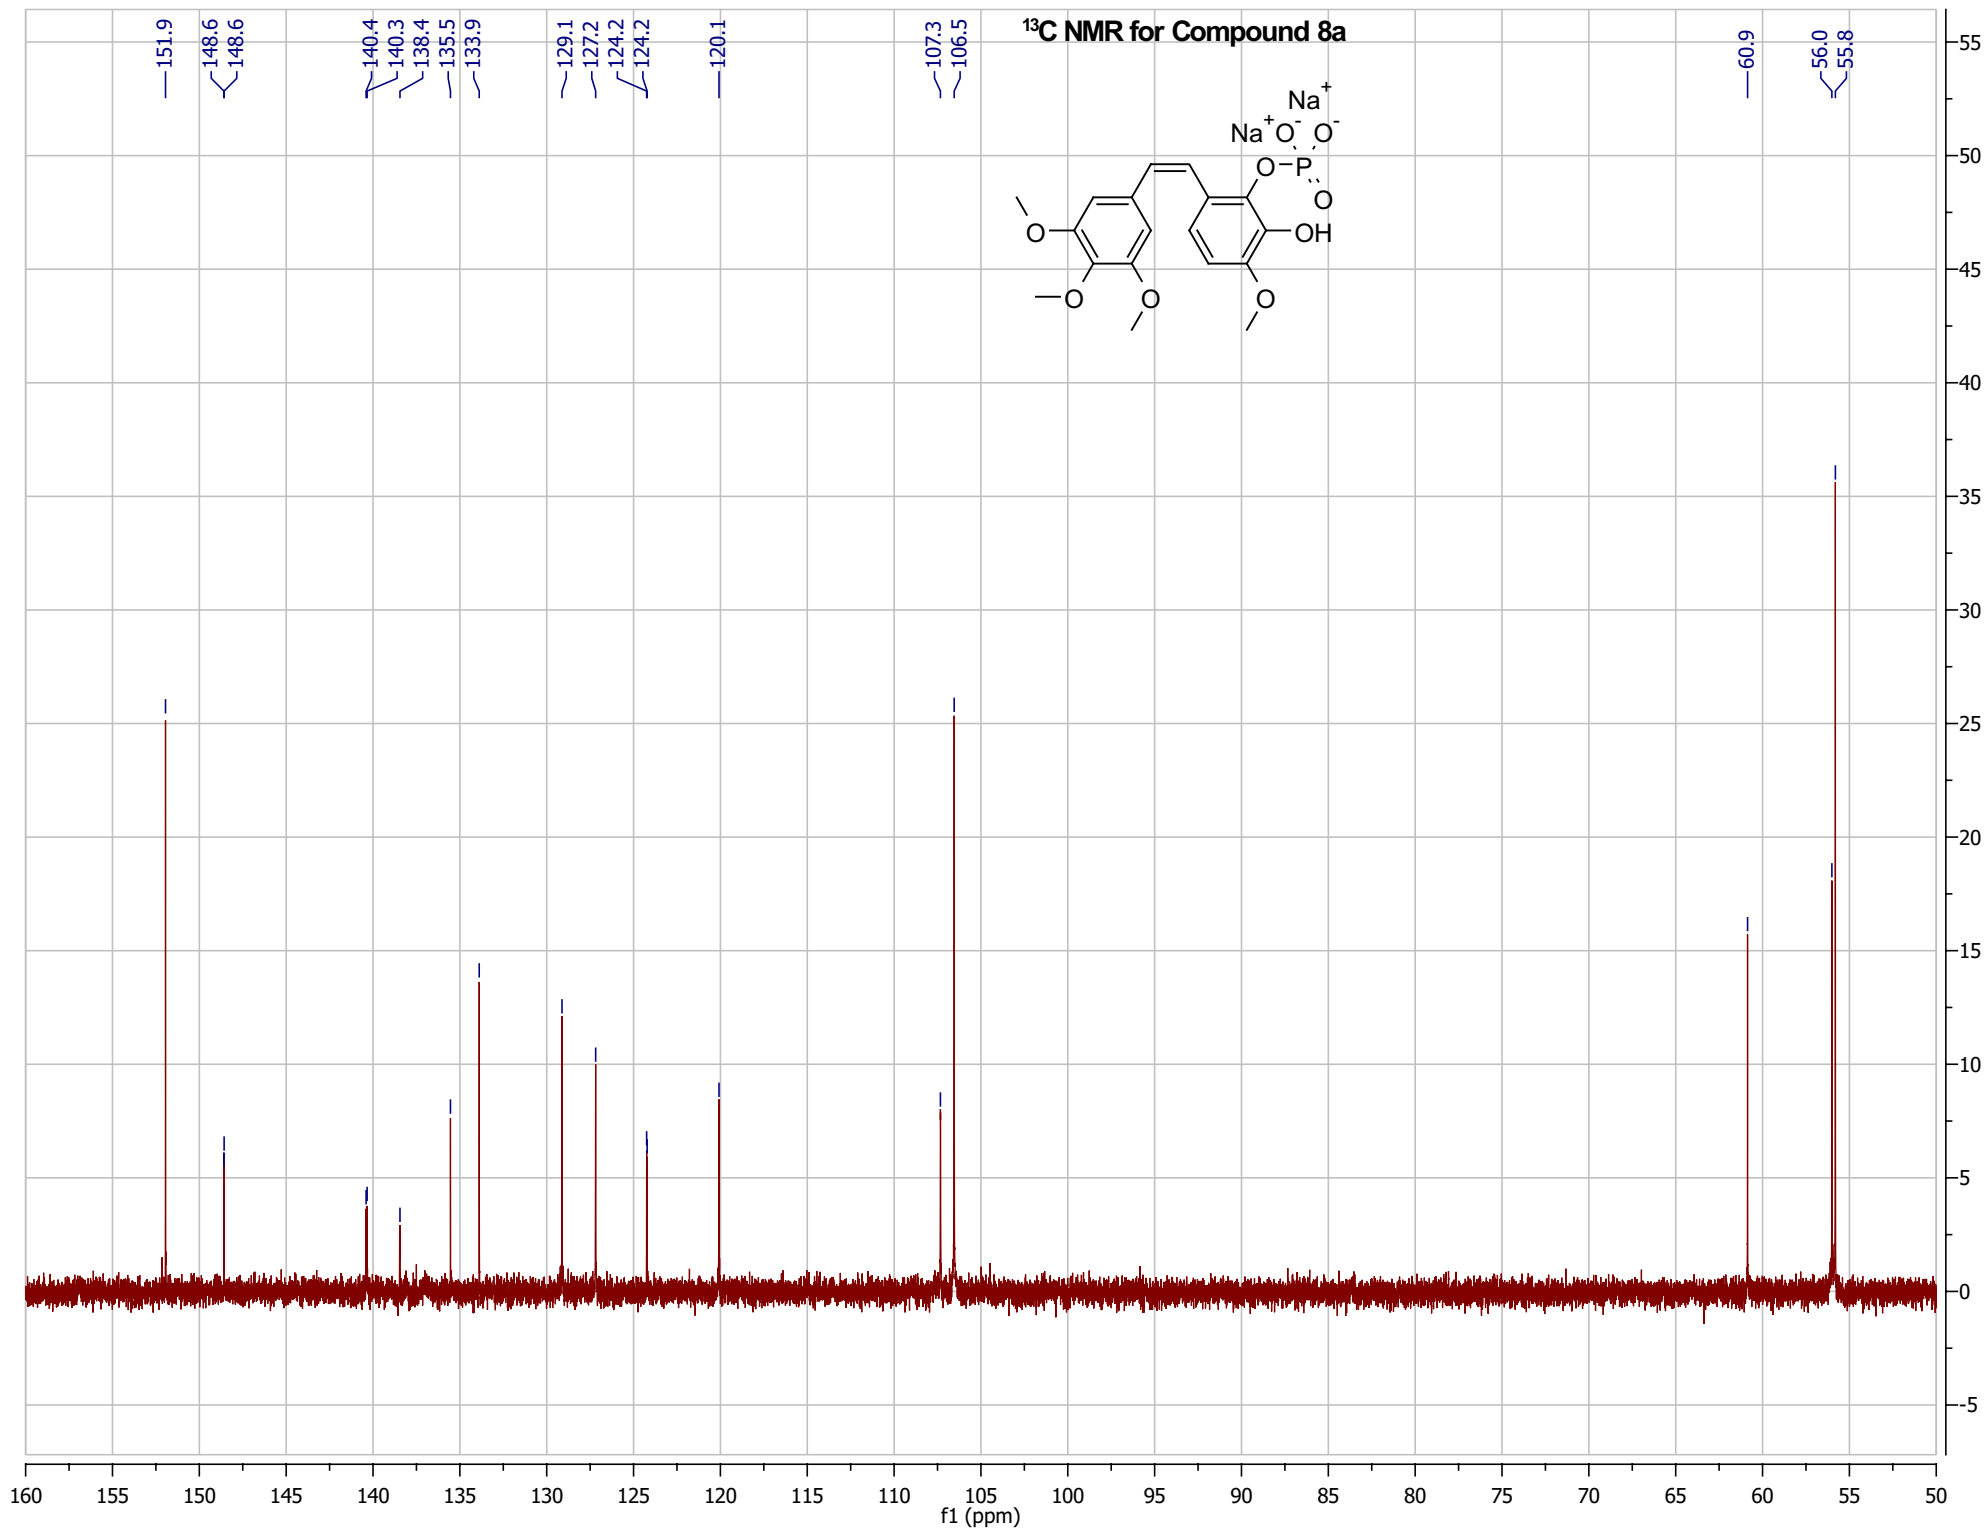

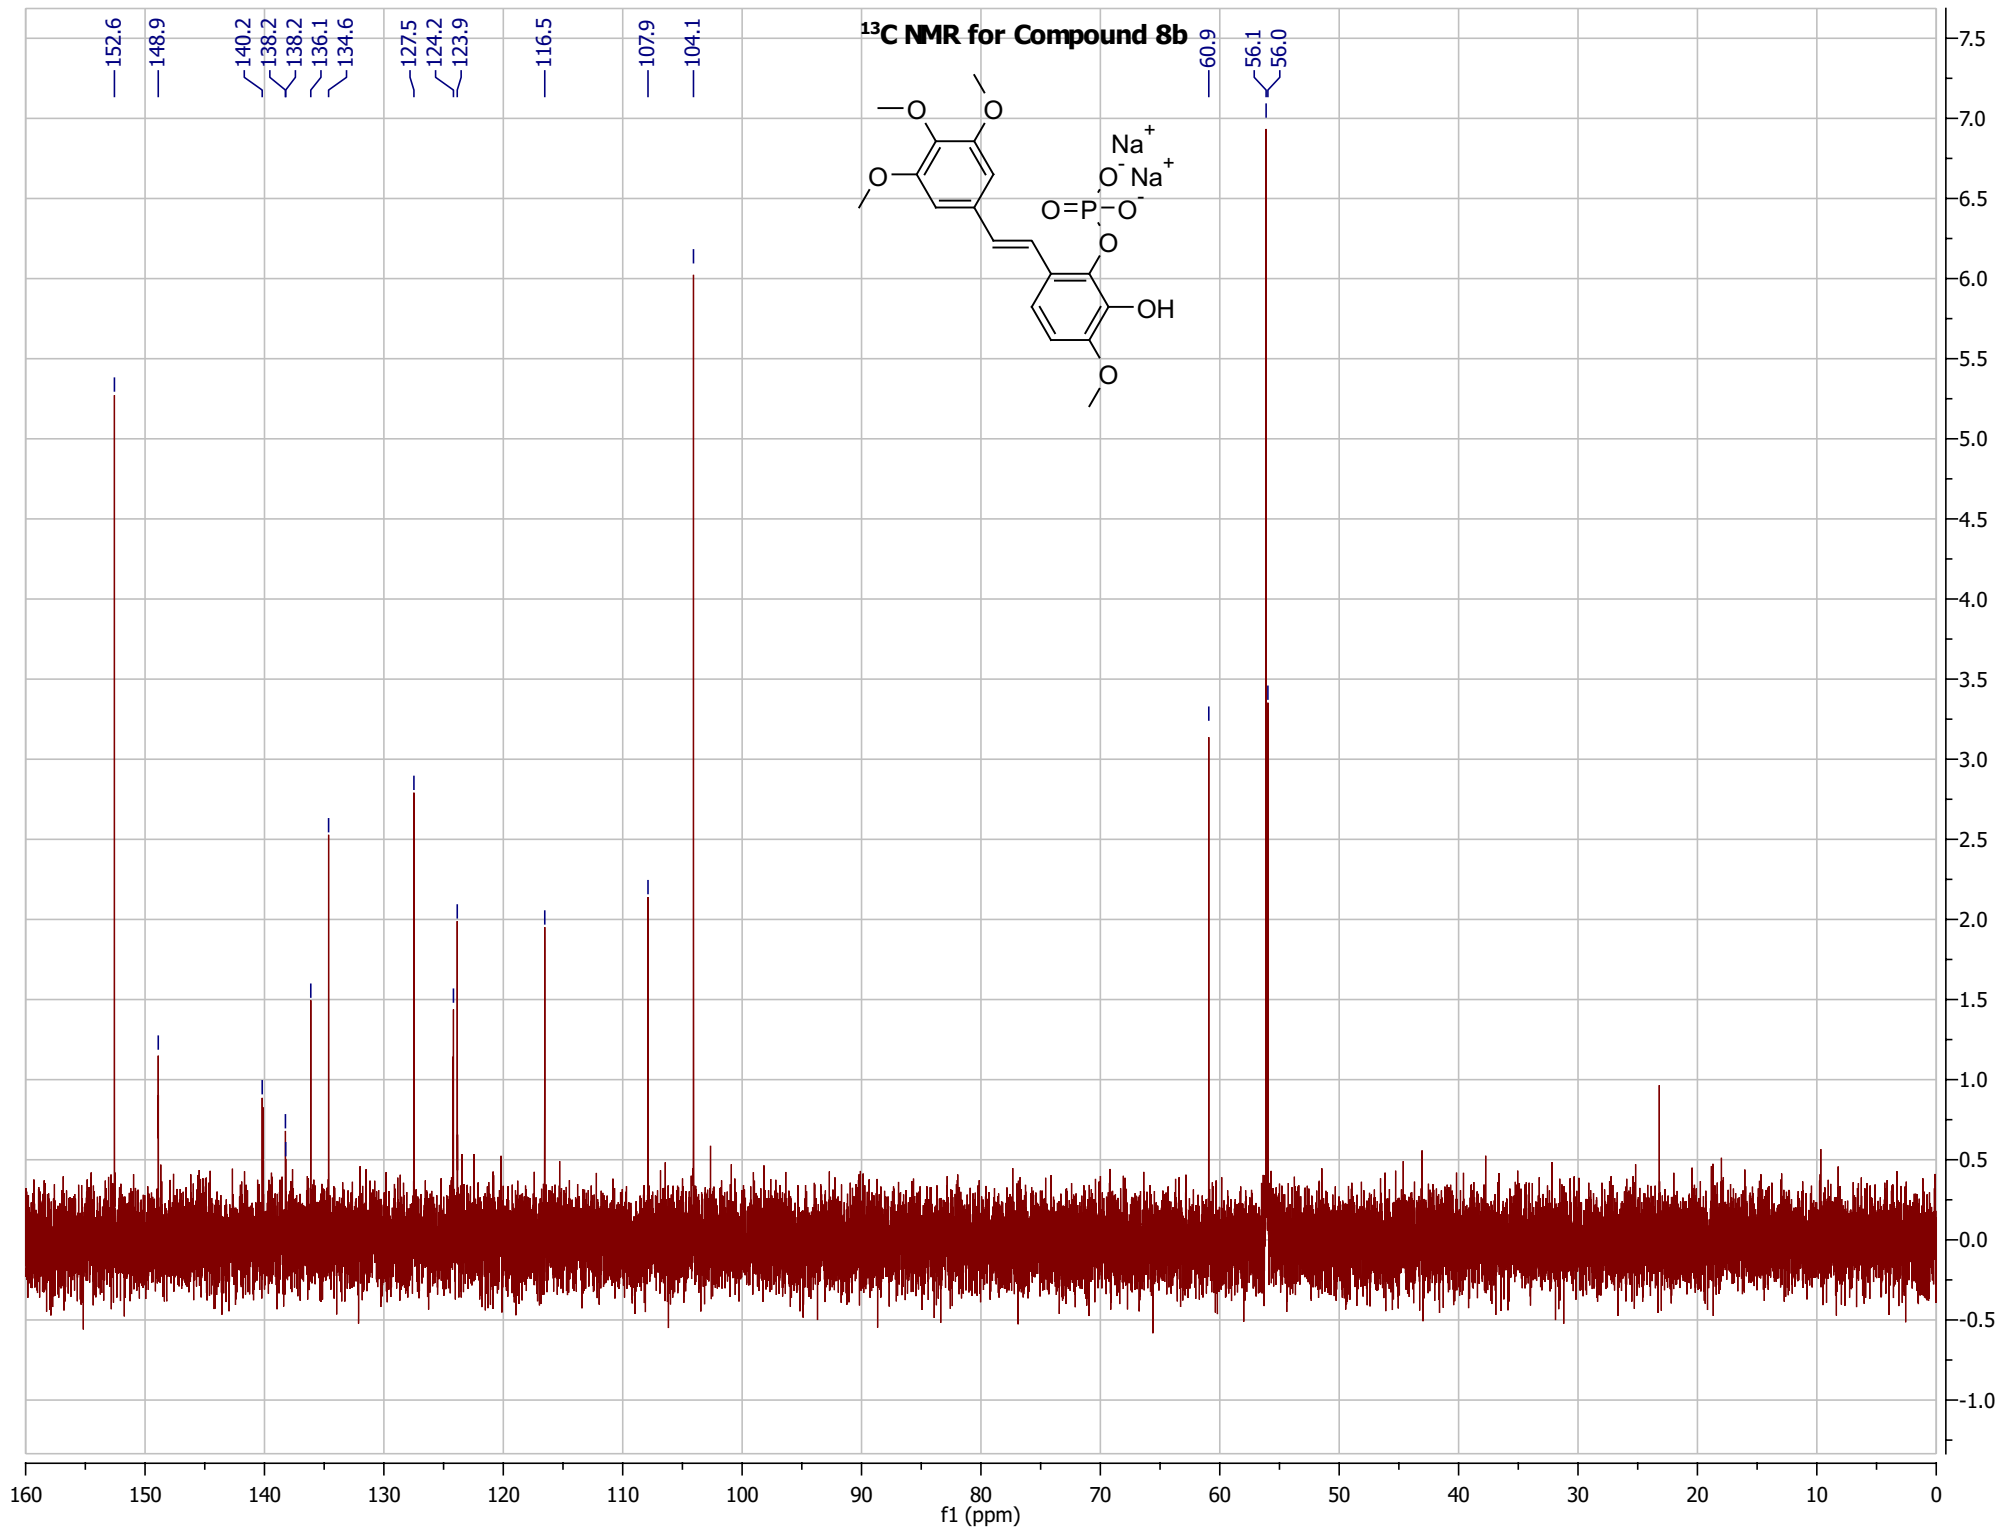



**<sup>31</sup>P NMR for Compound 2b**

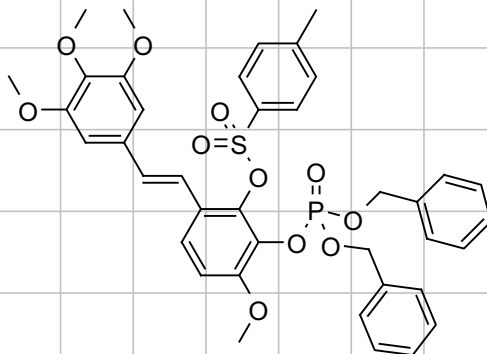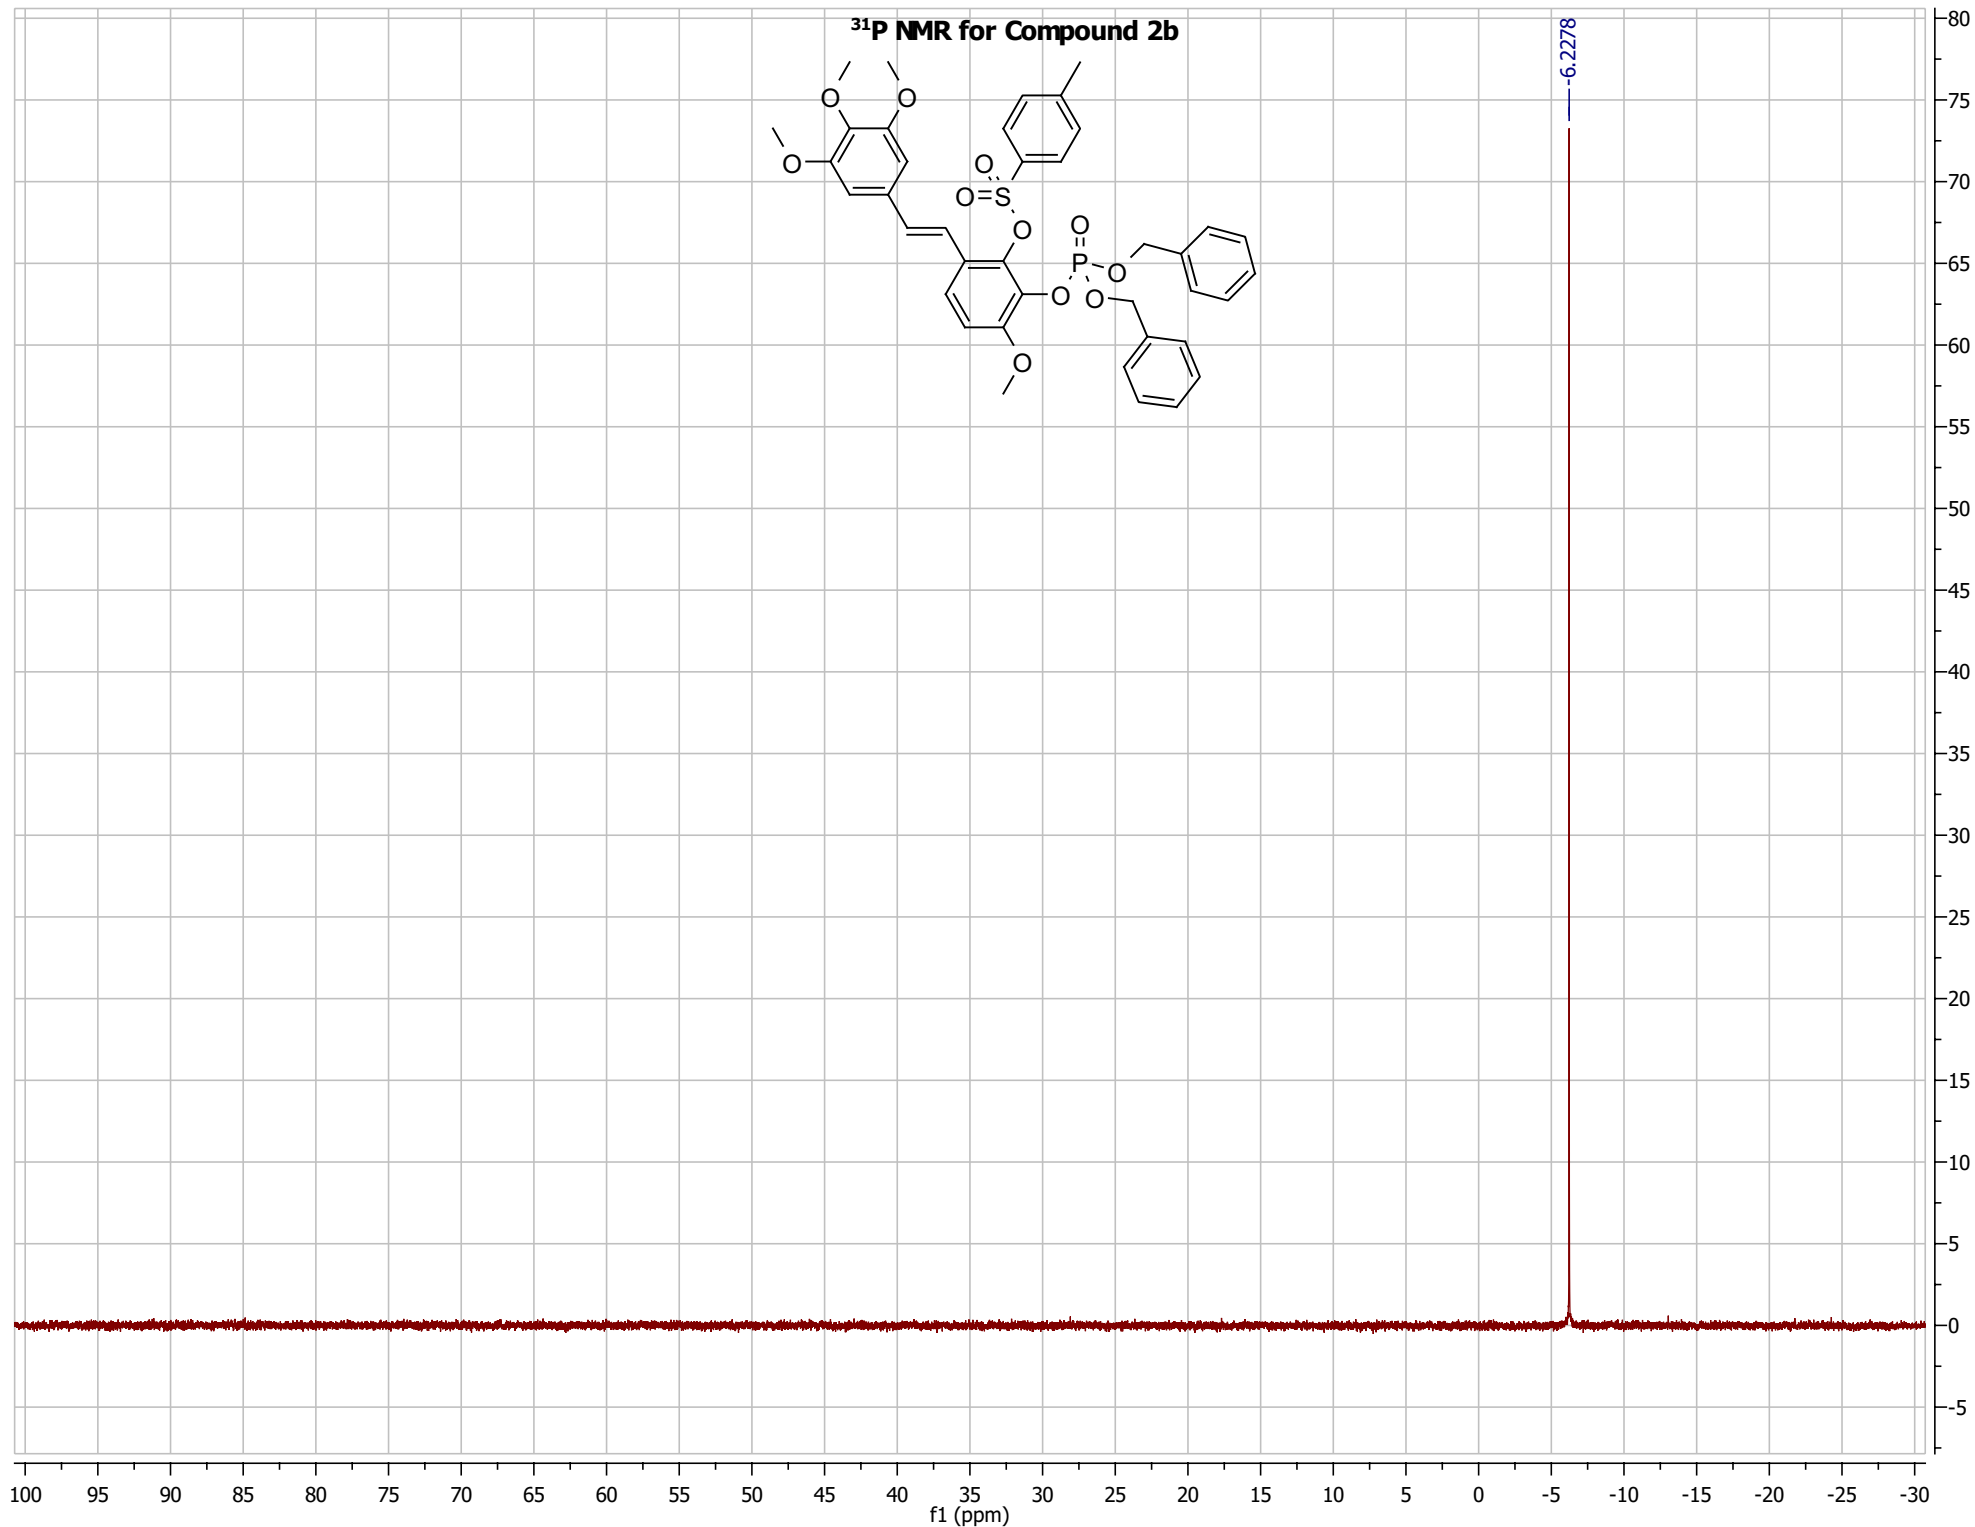

<sup>31</sup>P NMR for Compound 3a

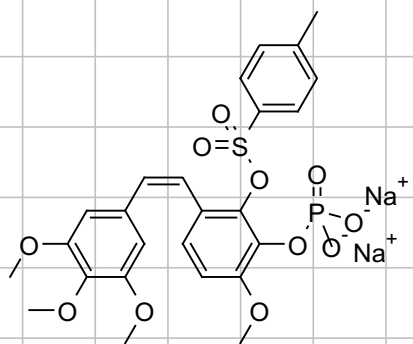

—2.7334

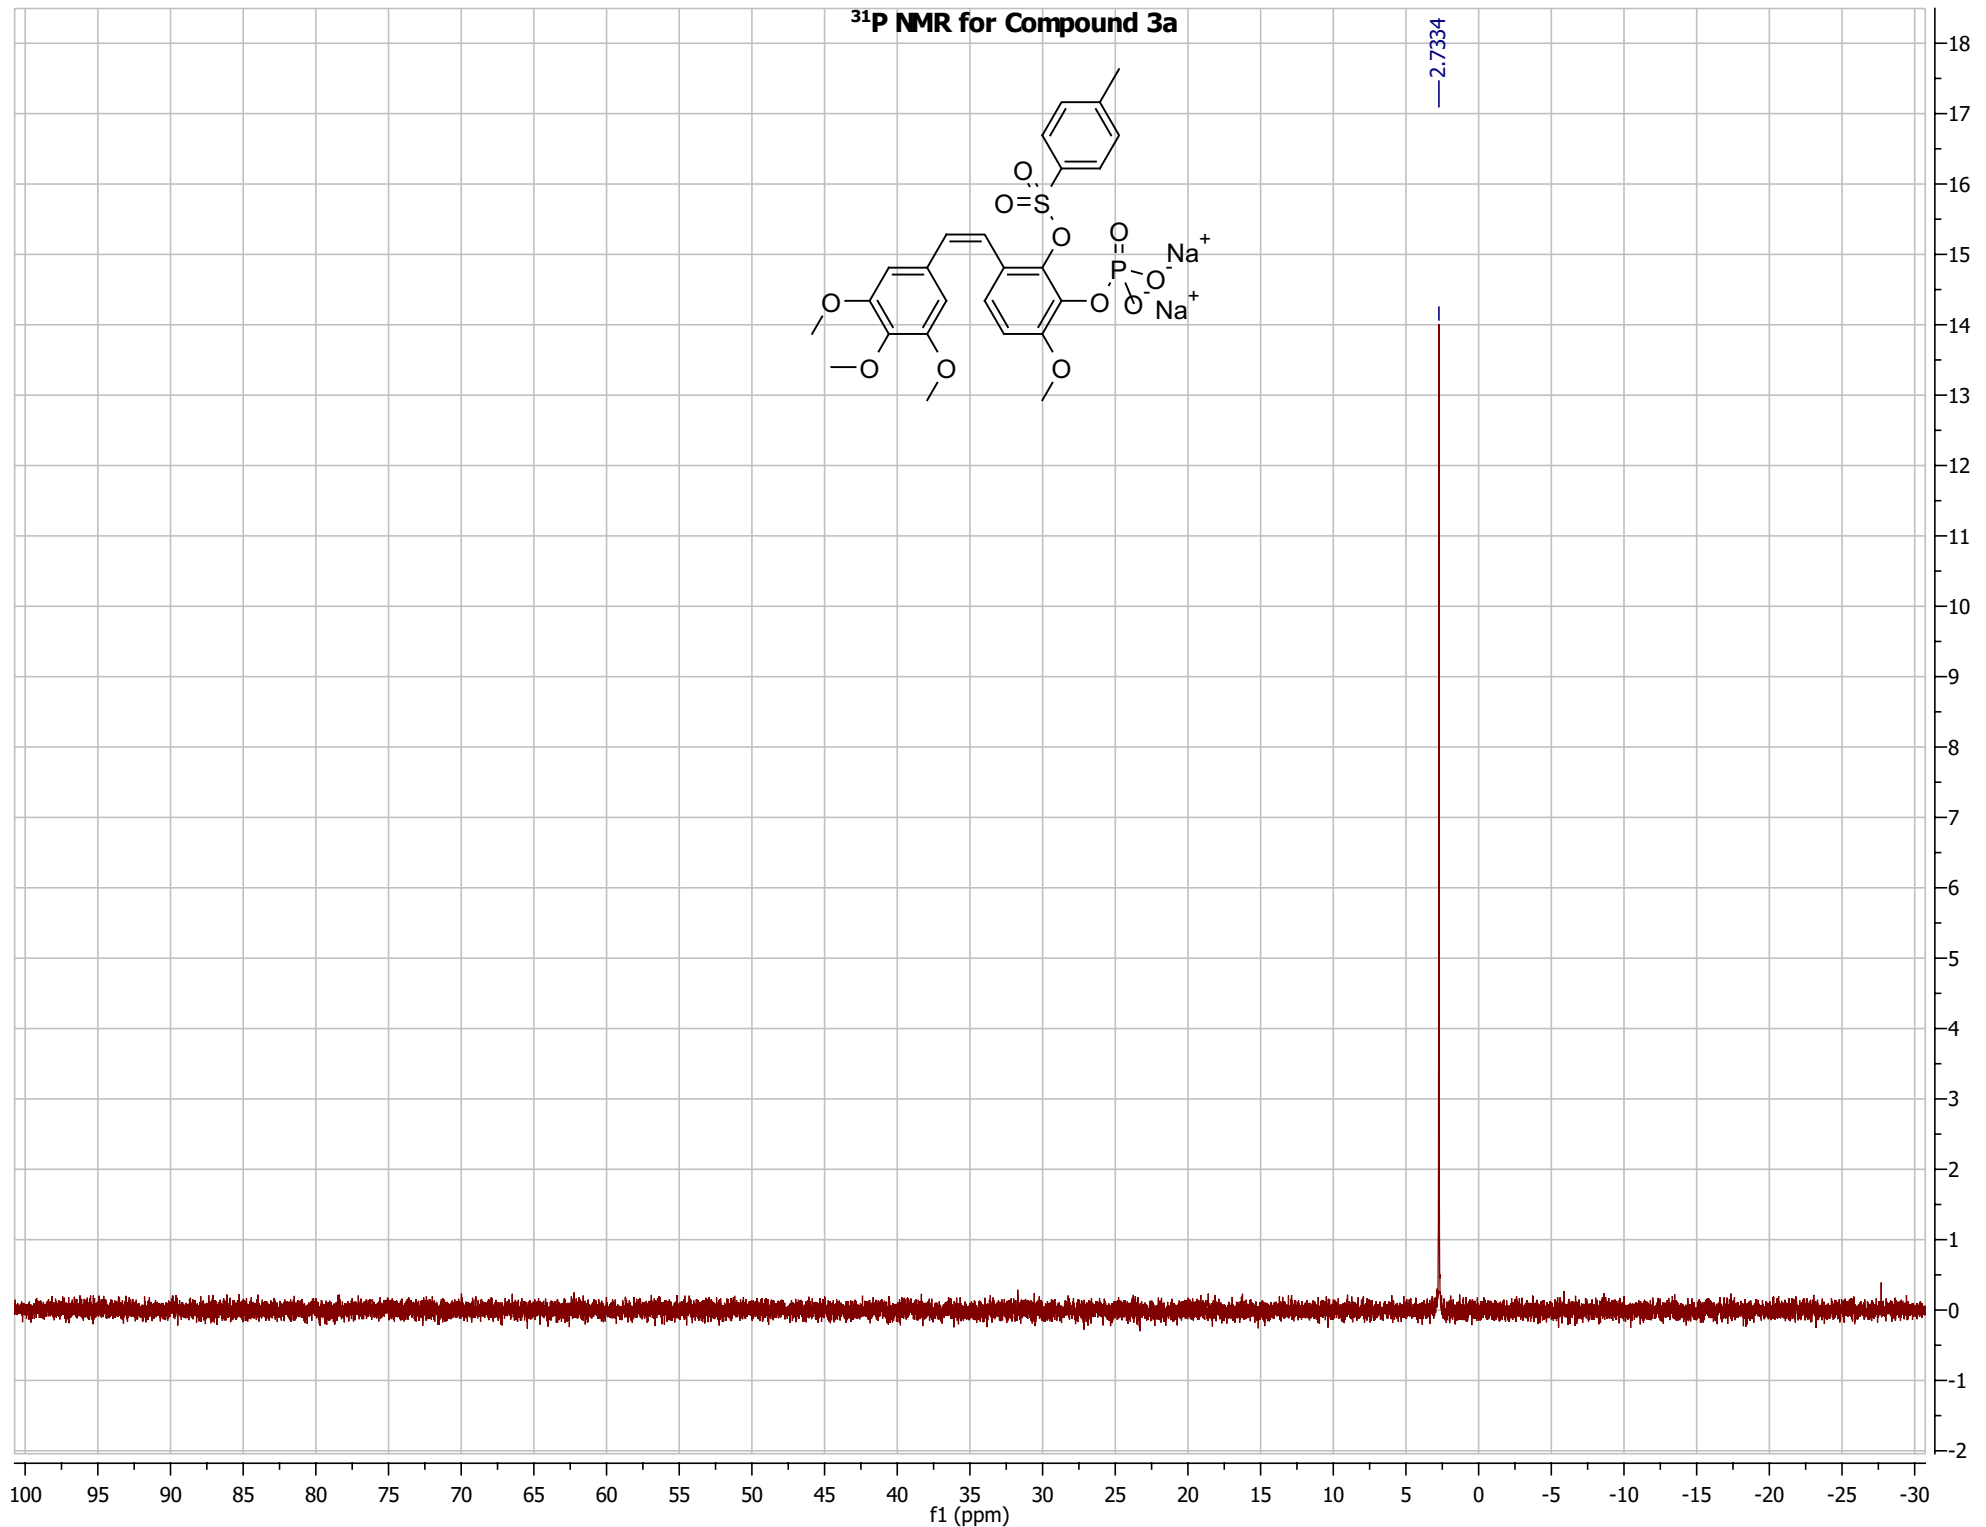

**<sup>31</sup>P NMR for Compound 3b**

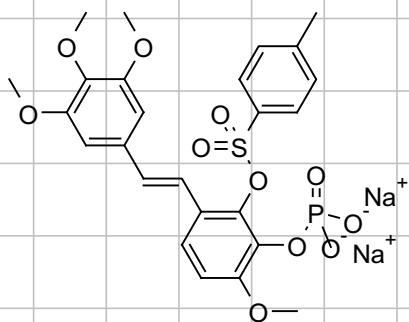

-3.9876

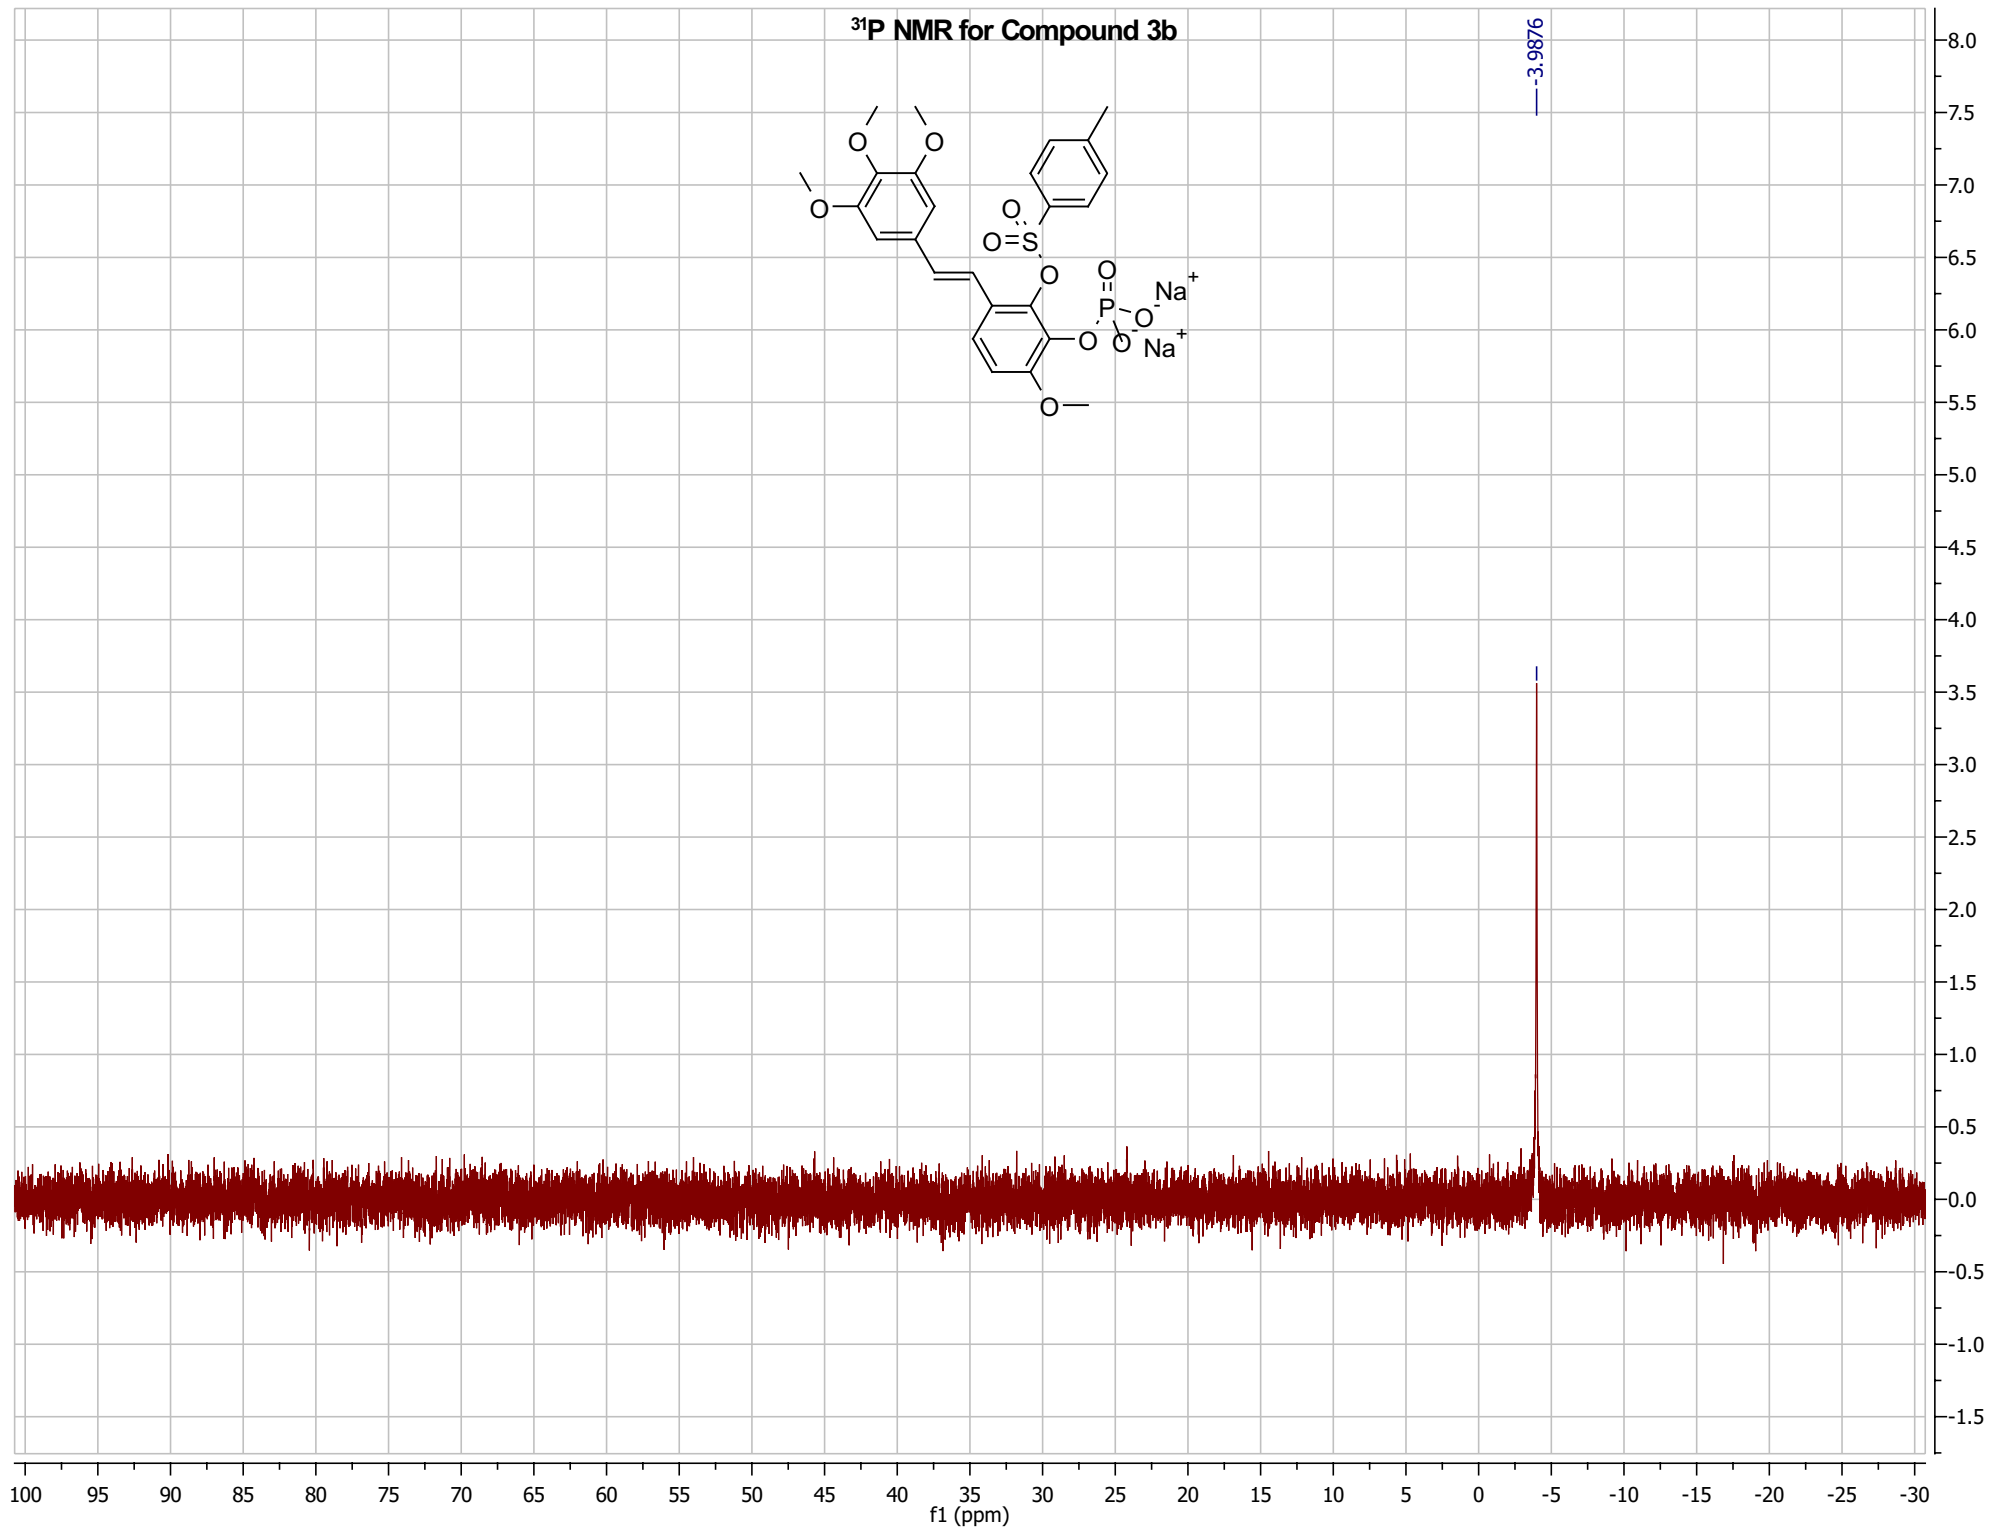

<sup>31</sup>P NMR for Compound 4a

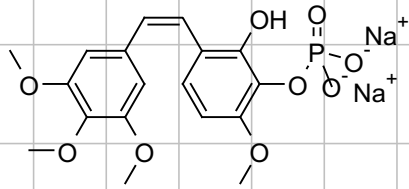

— 3.68

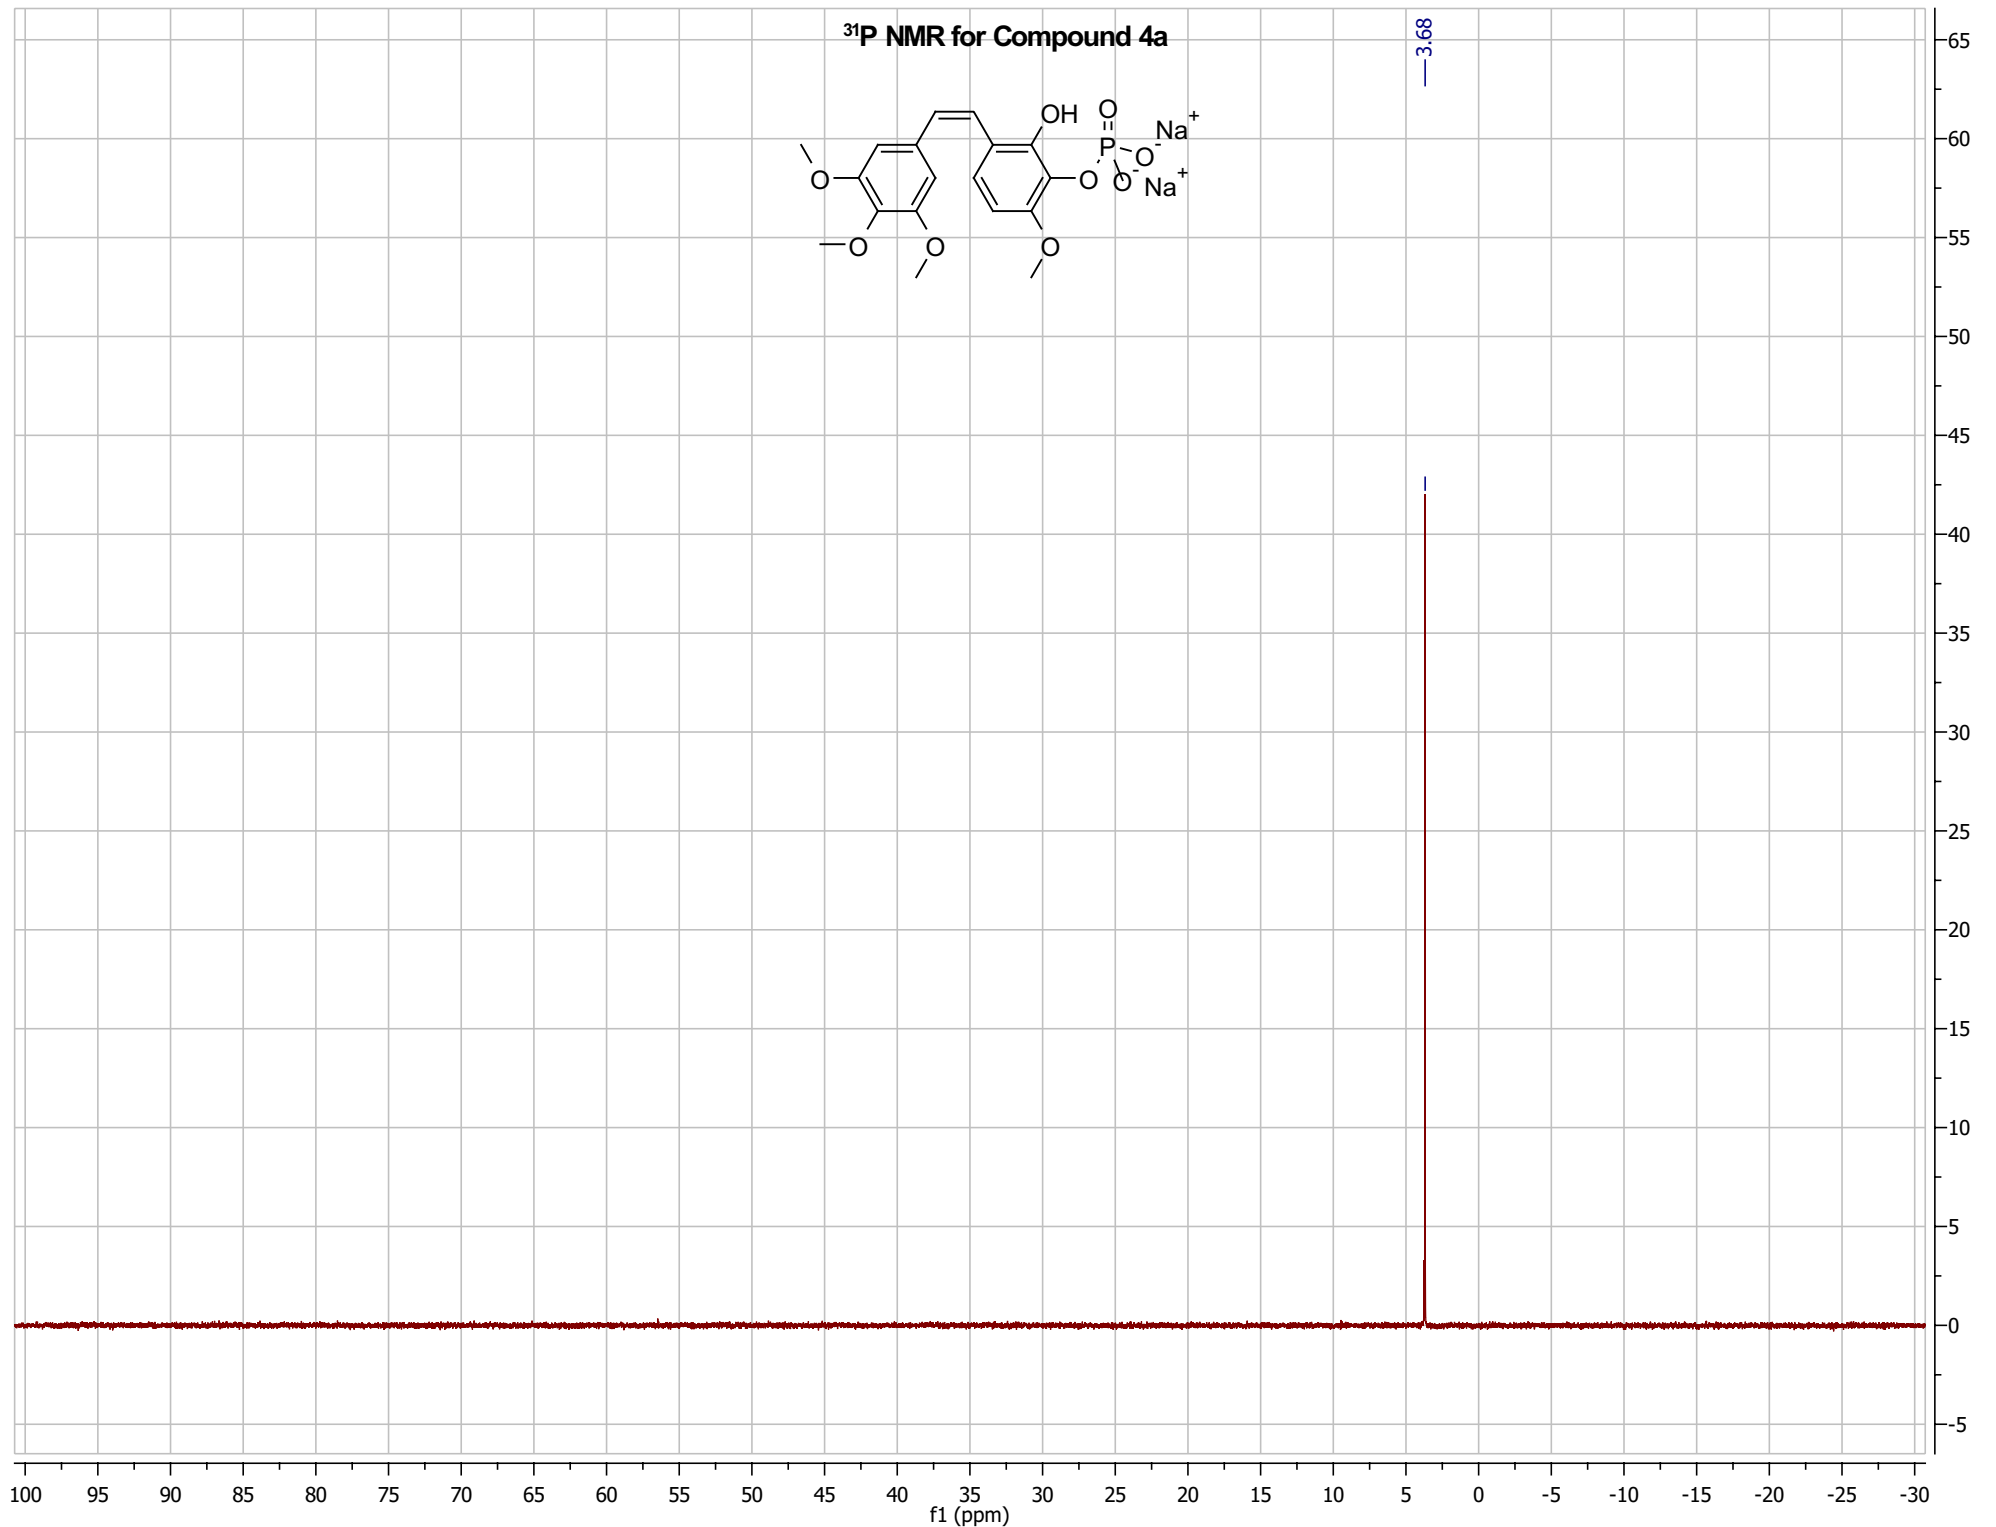

31P NMR for Compound 4b

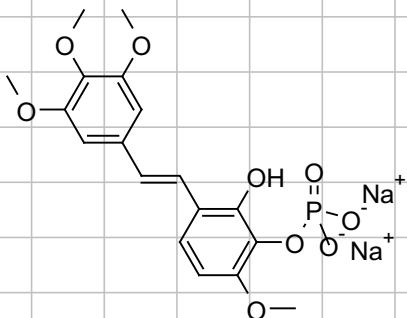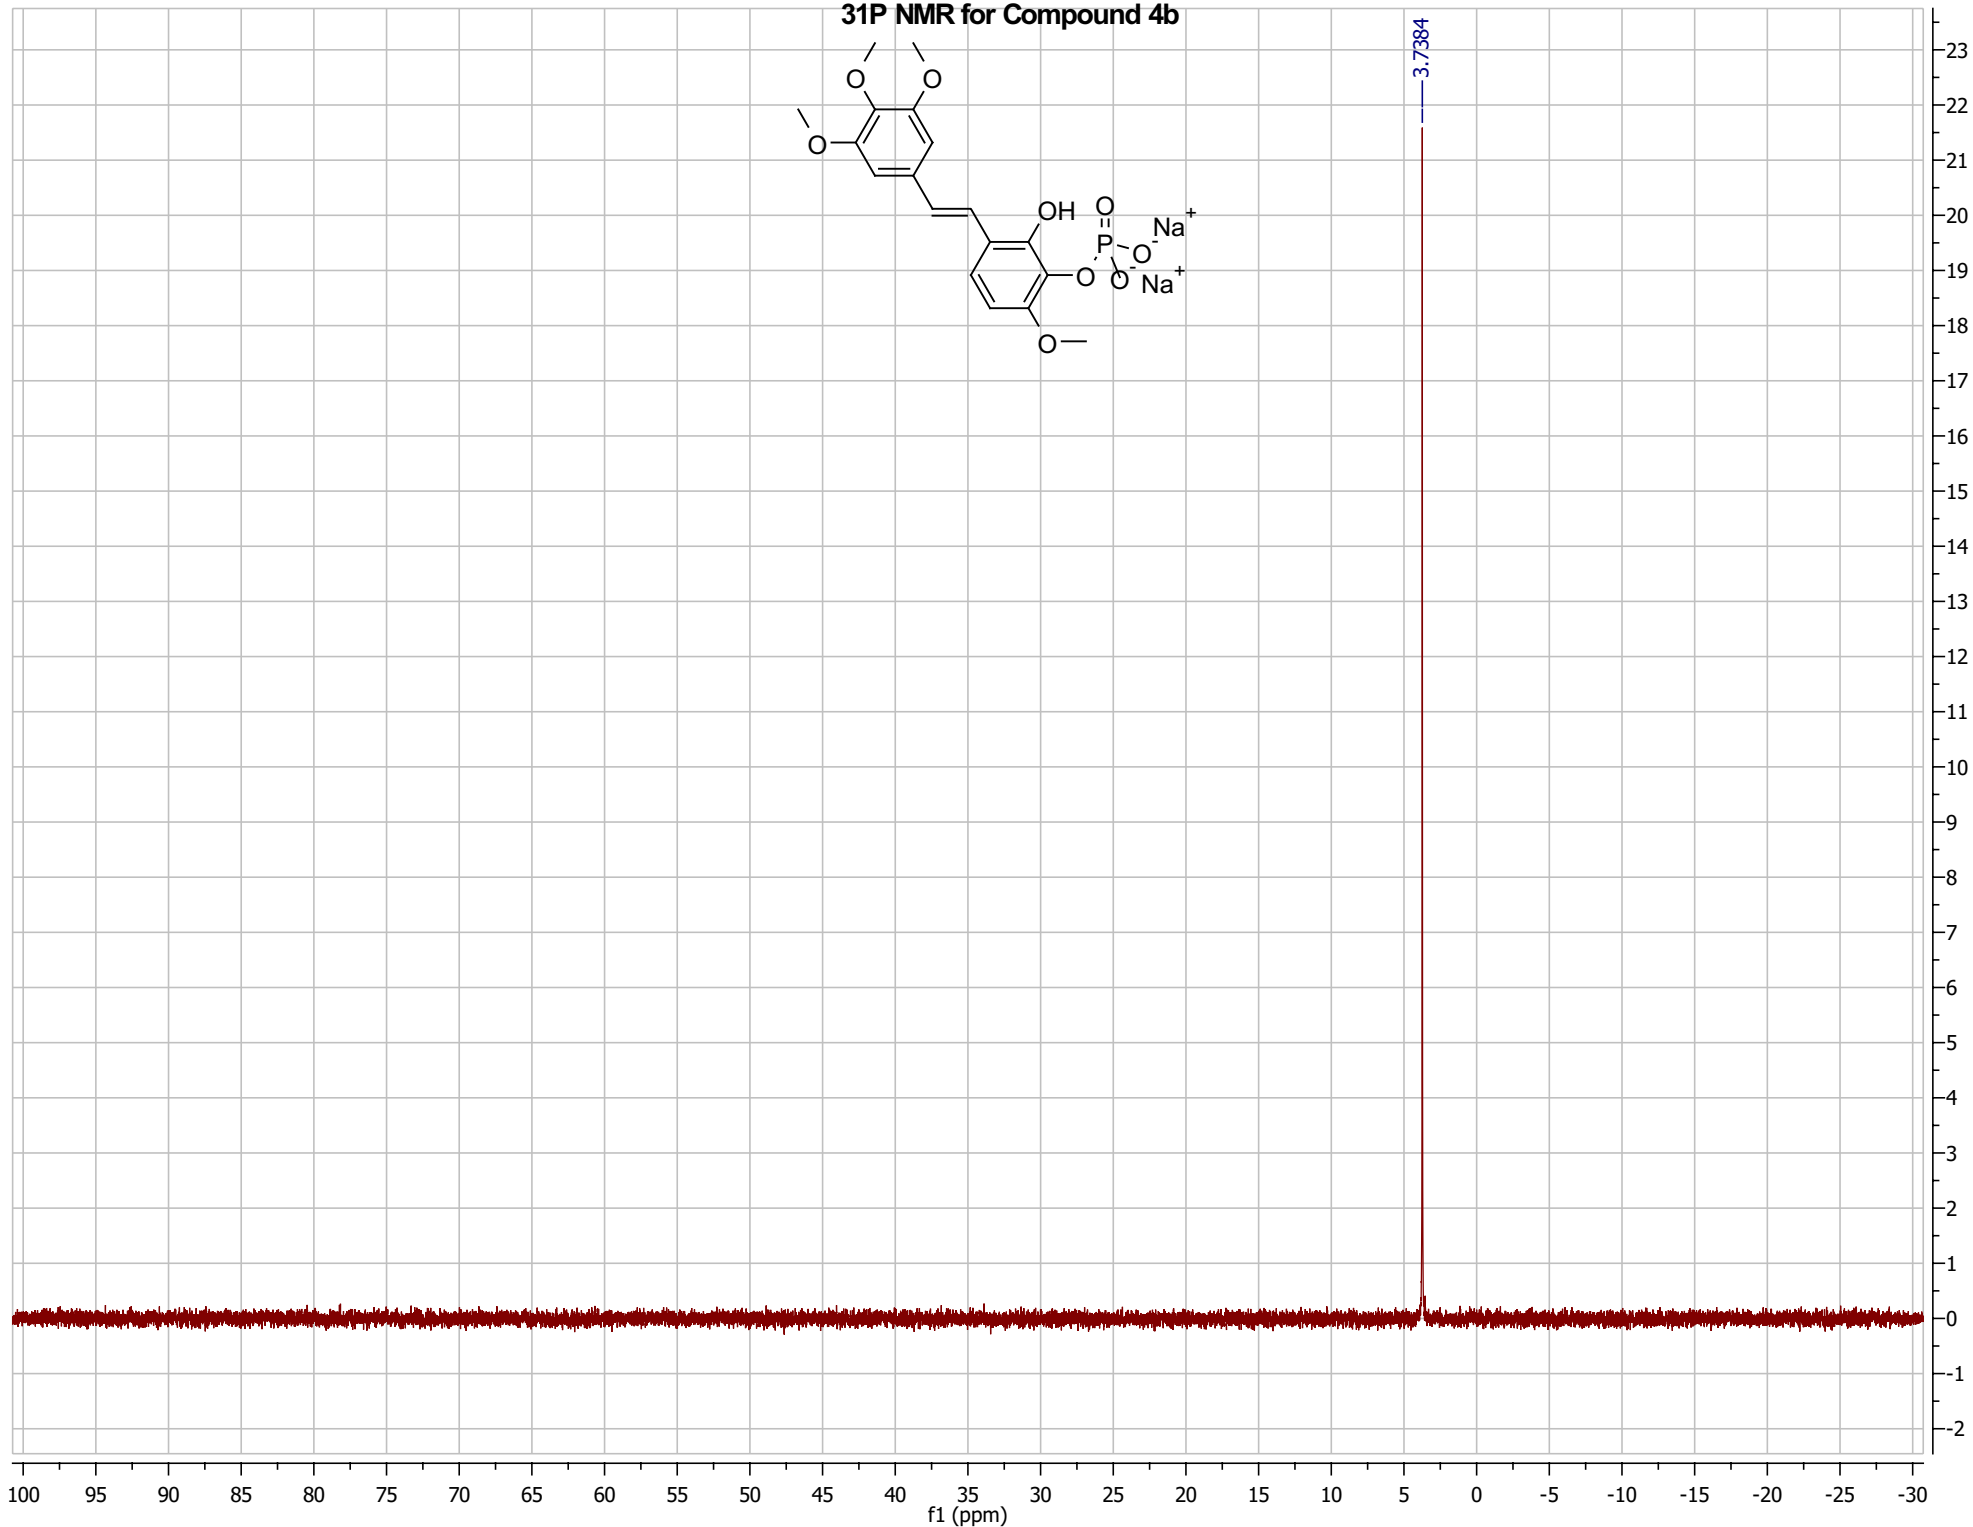

**<sup>31</sup>P NMR for Compound 6a**

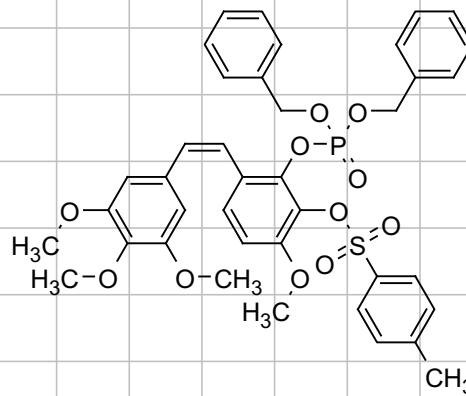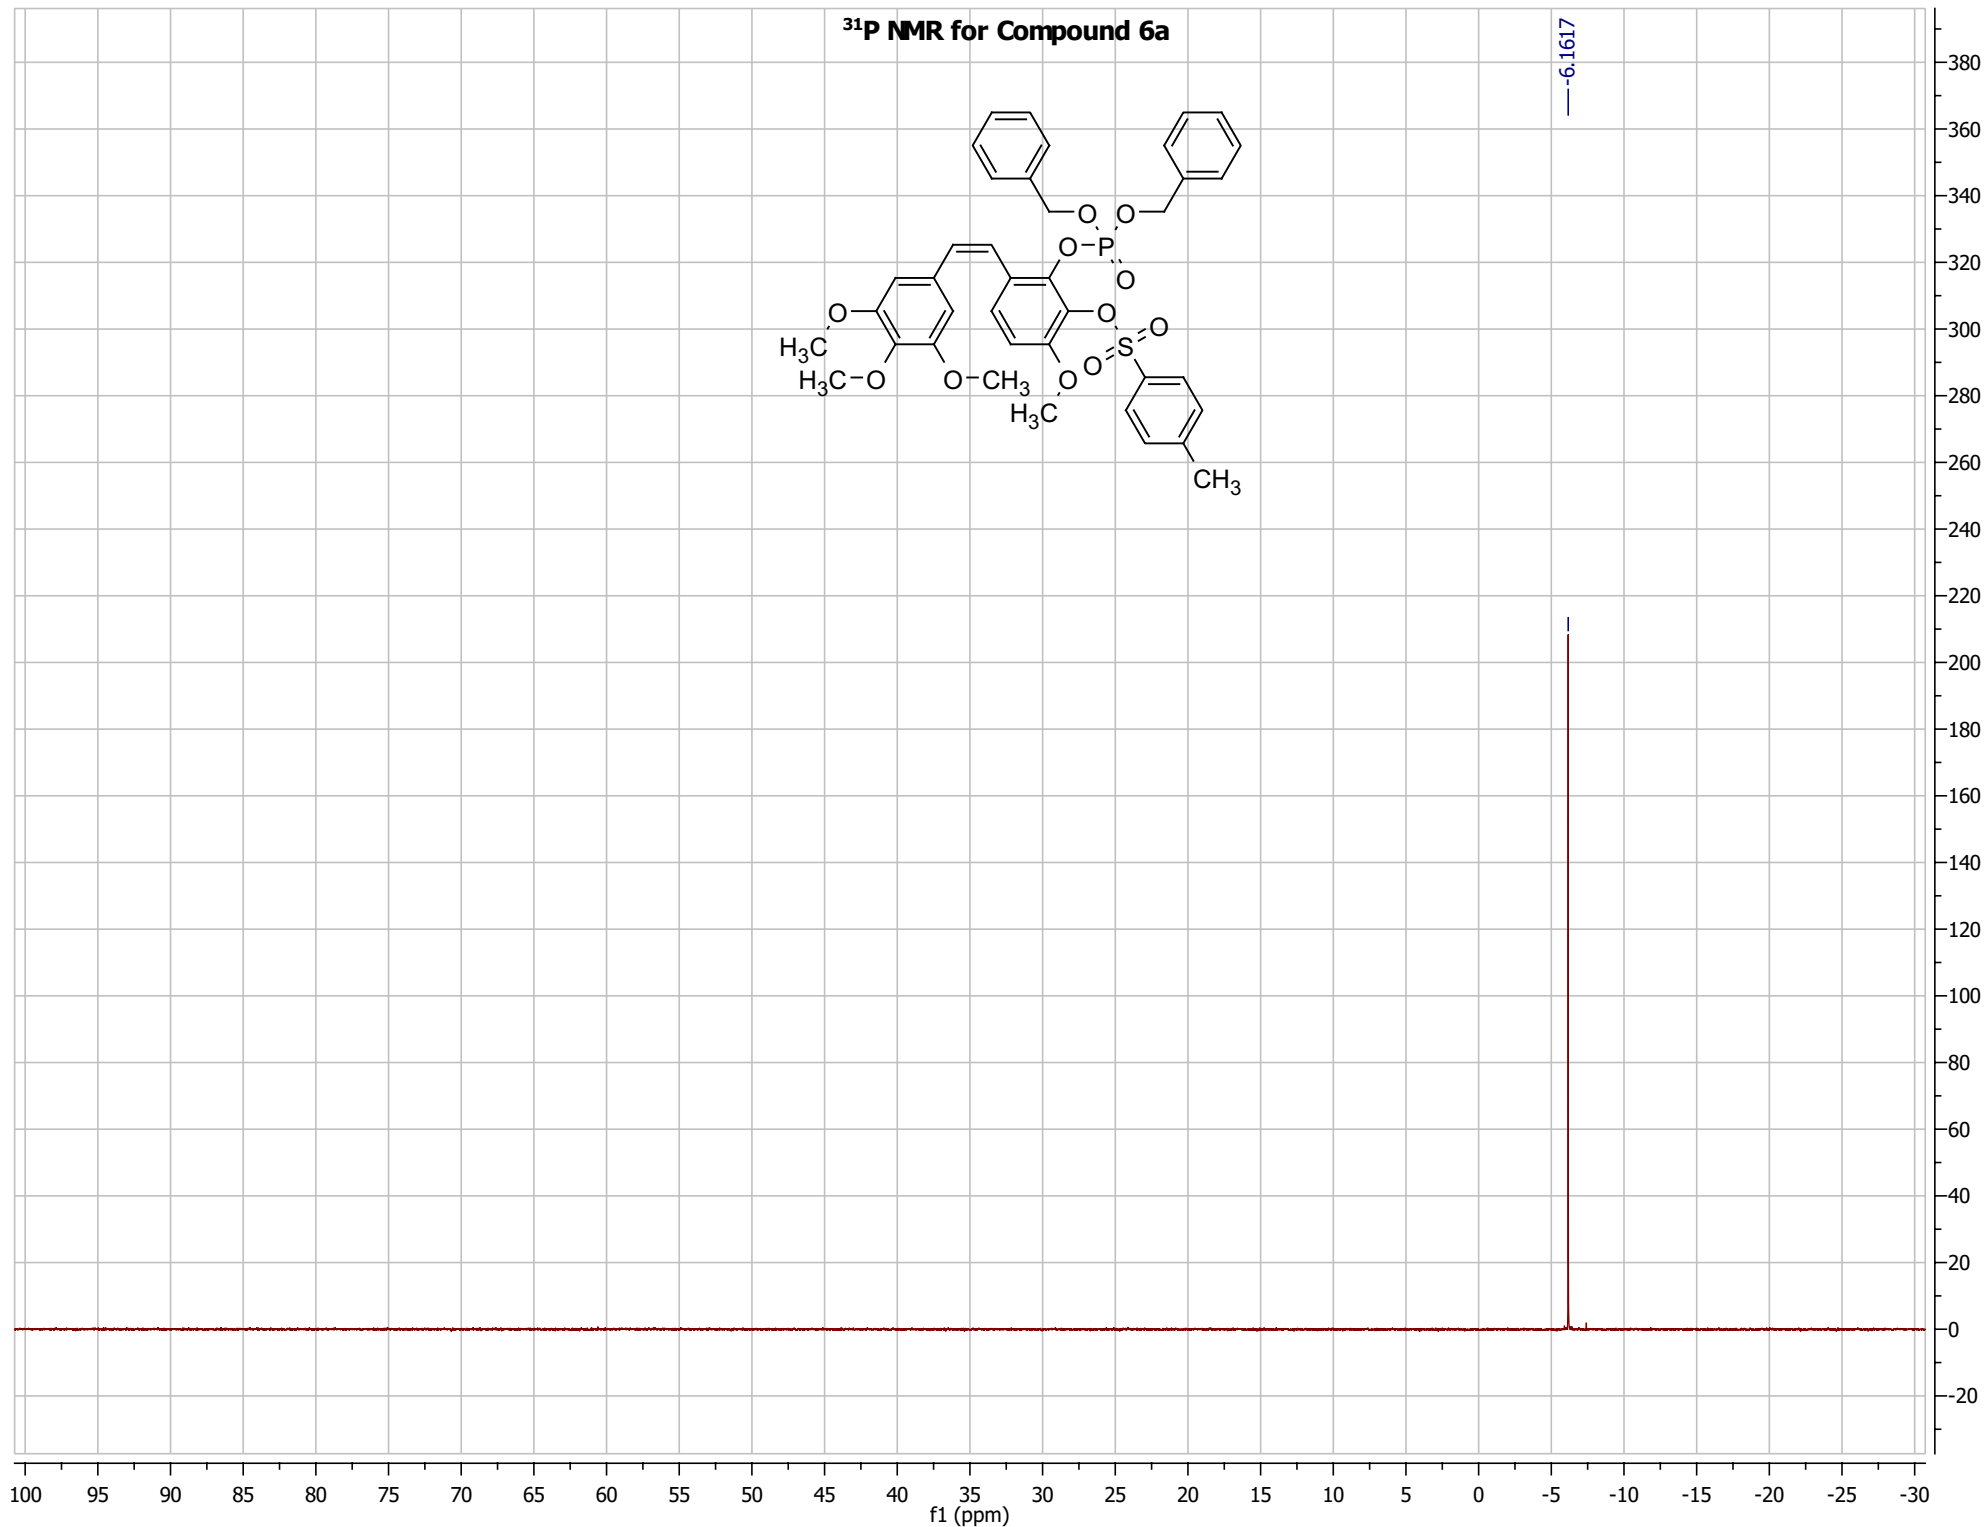

**<sup>31</sup>P NMR for Compound 7b**

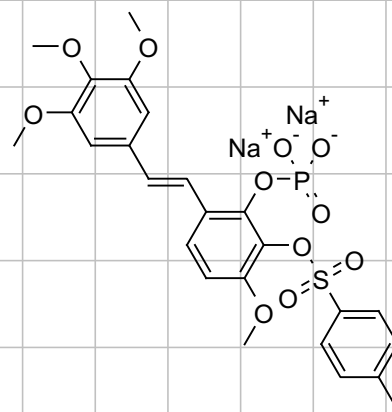

-4.2493

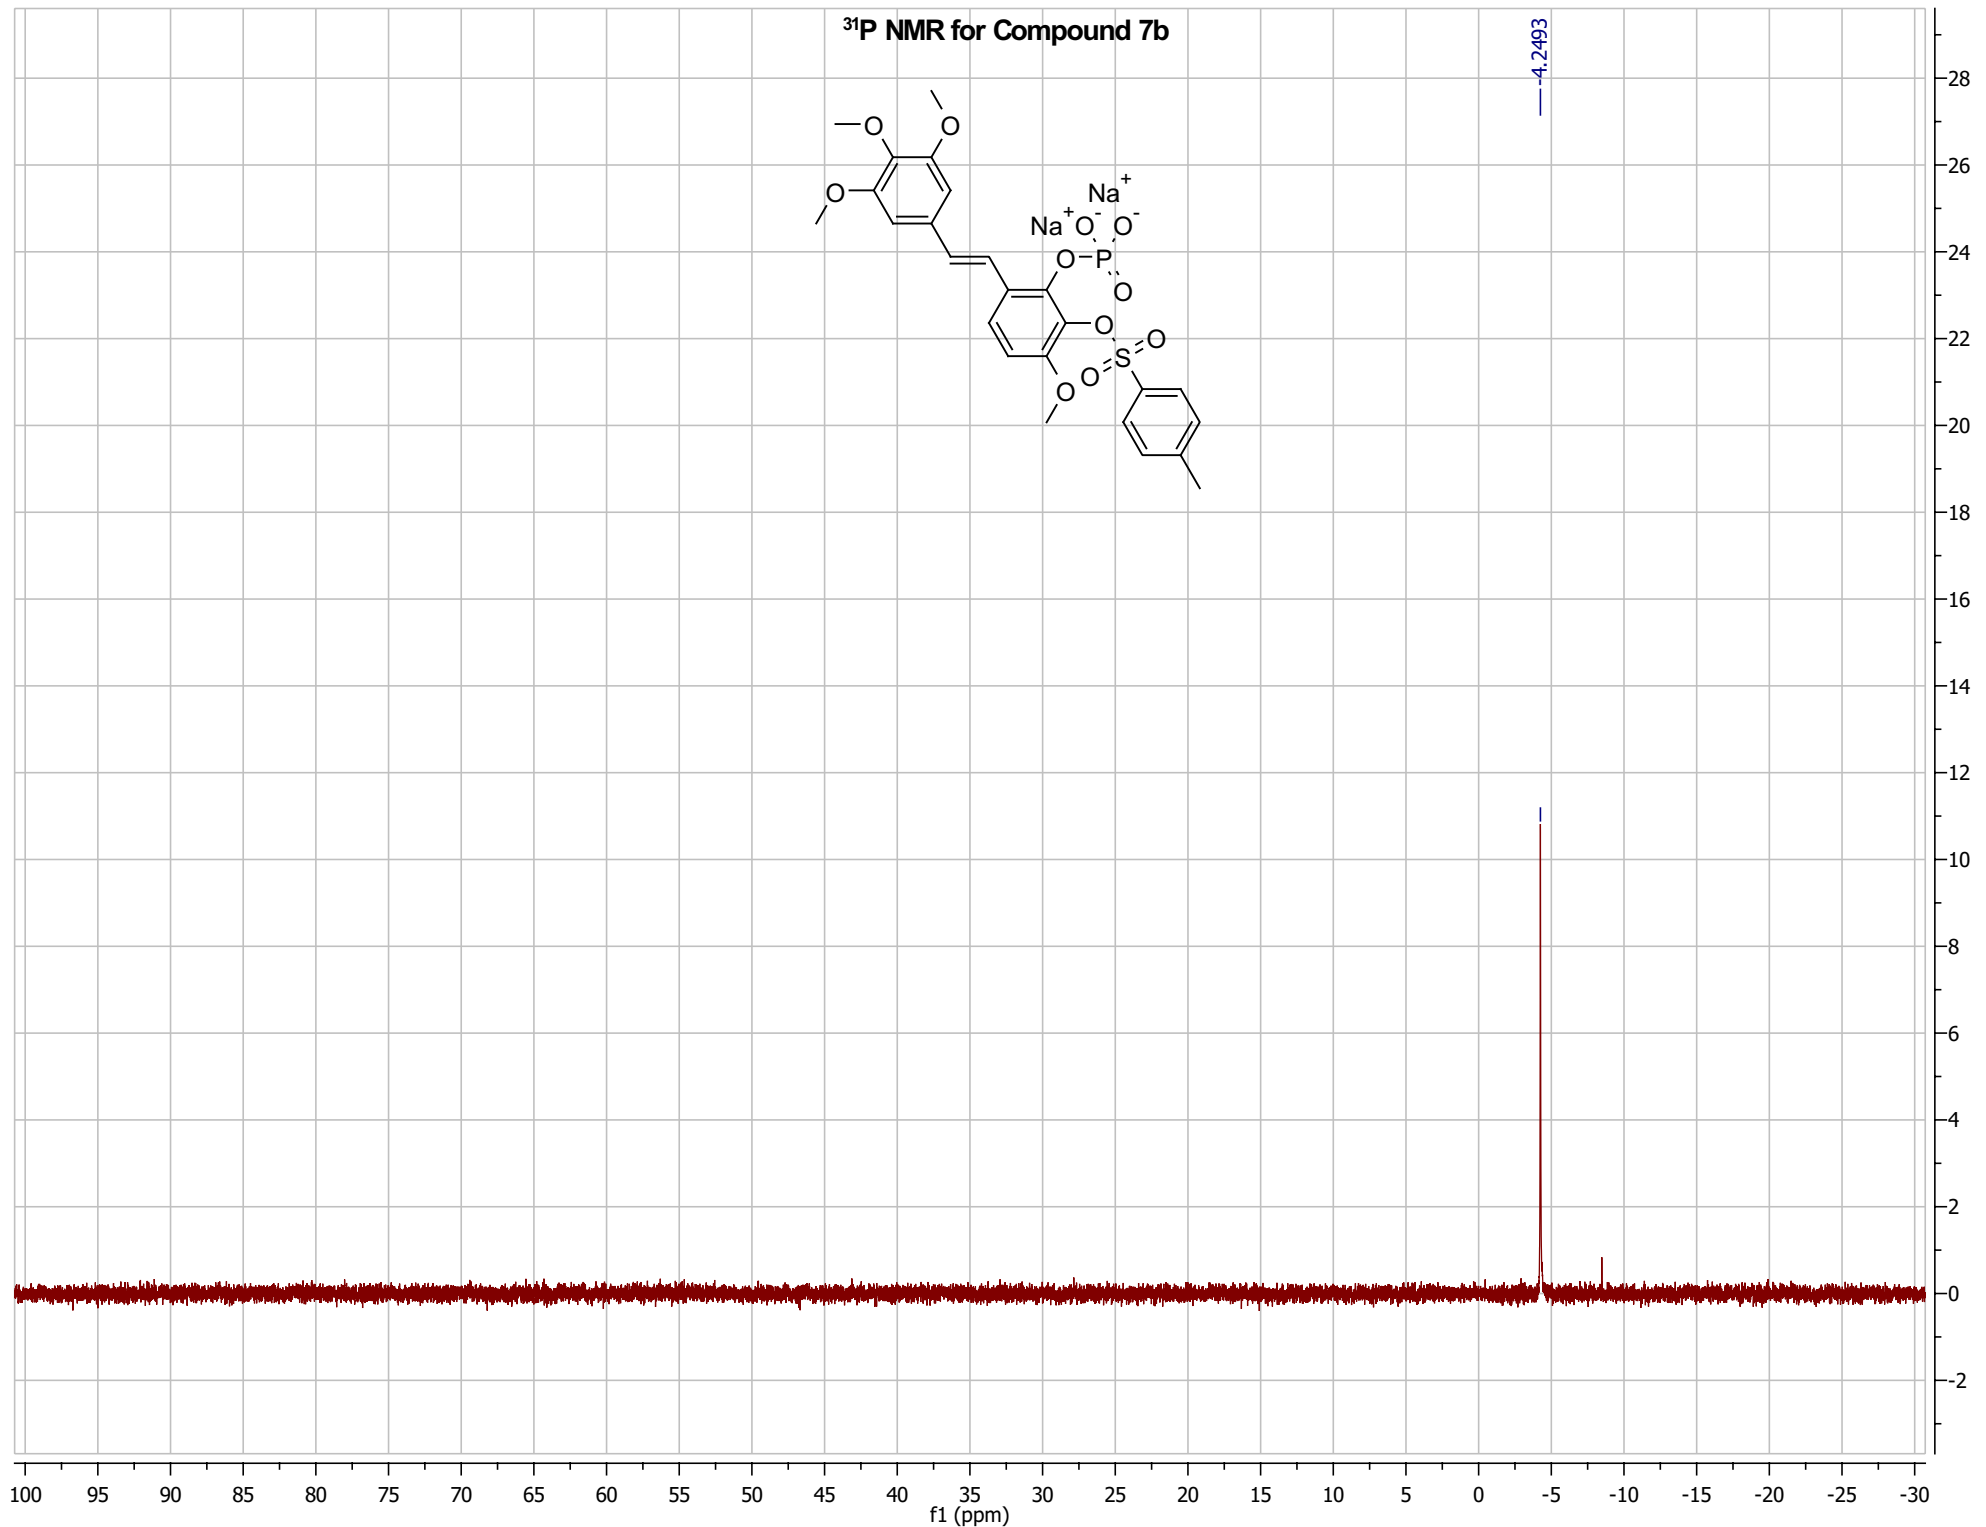

<sup>31</sup>P NMR for Compound 8a

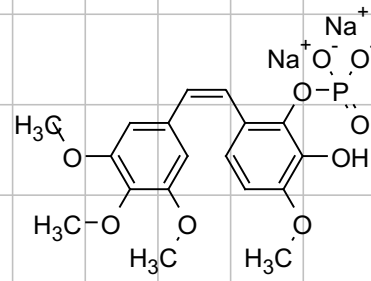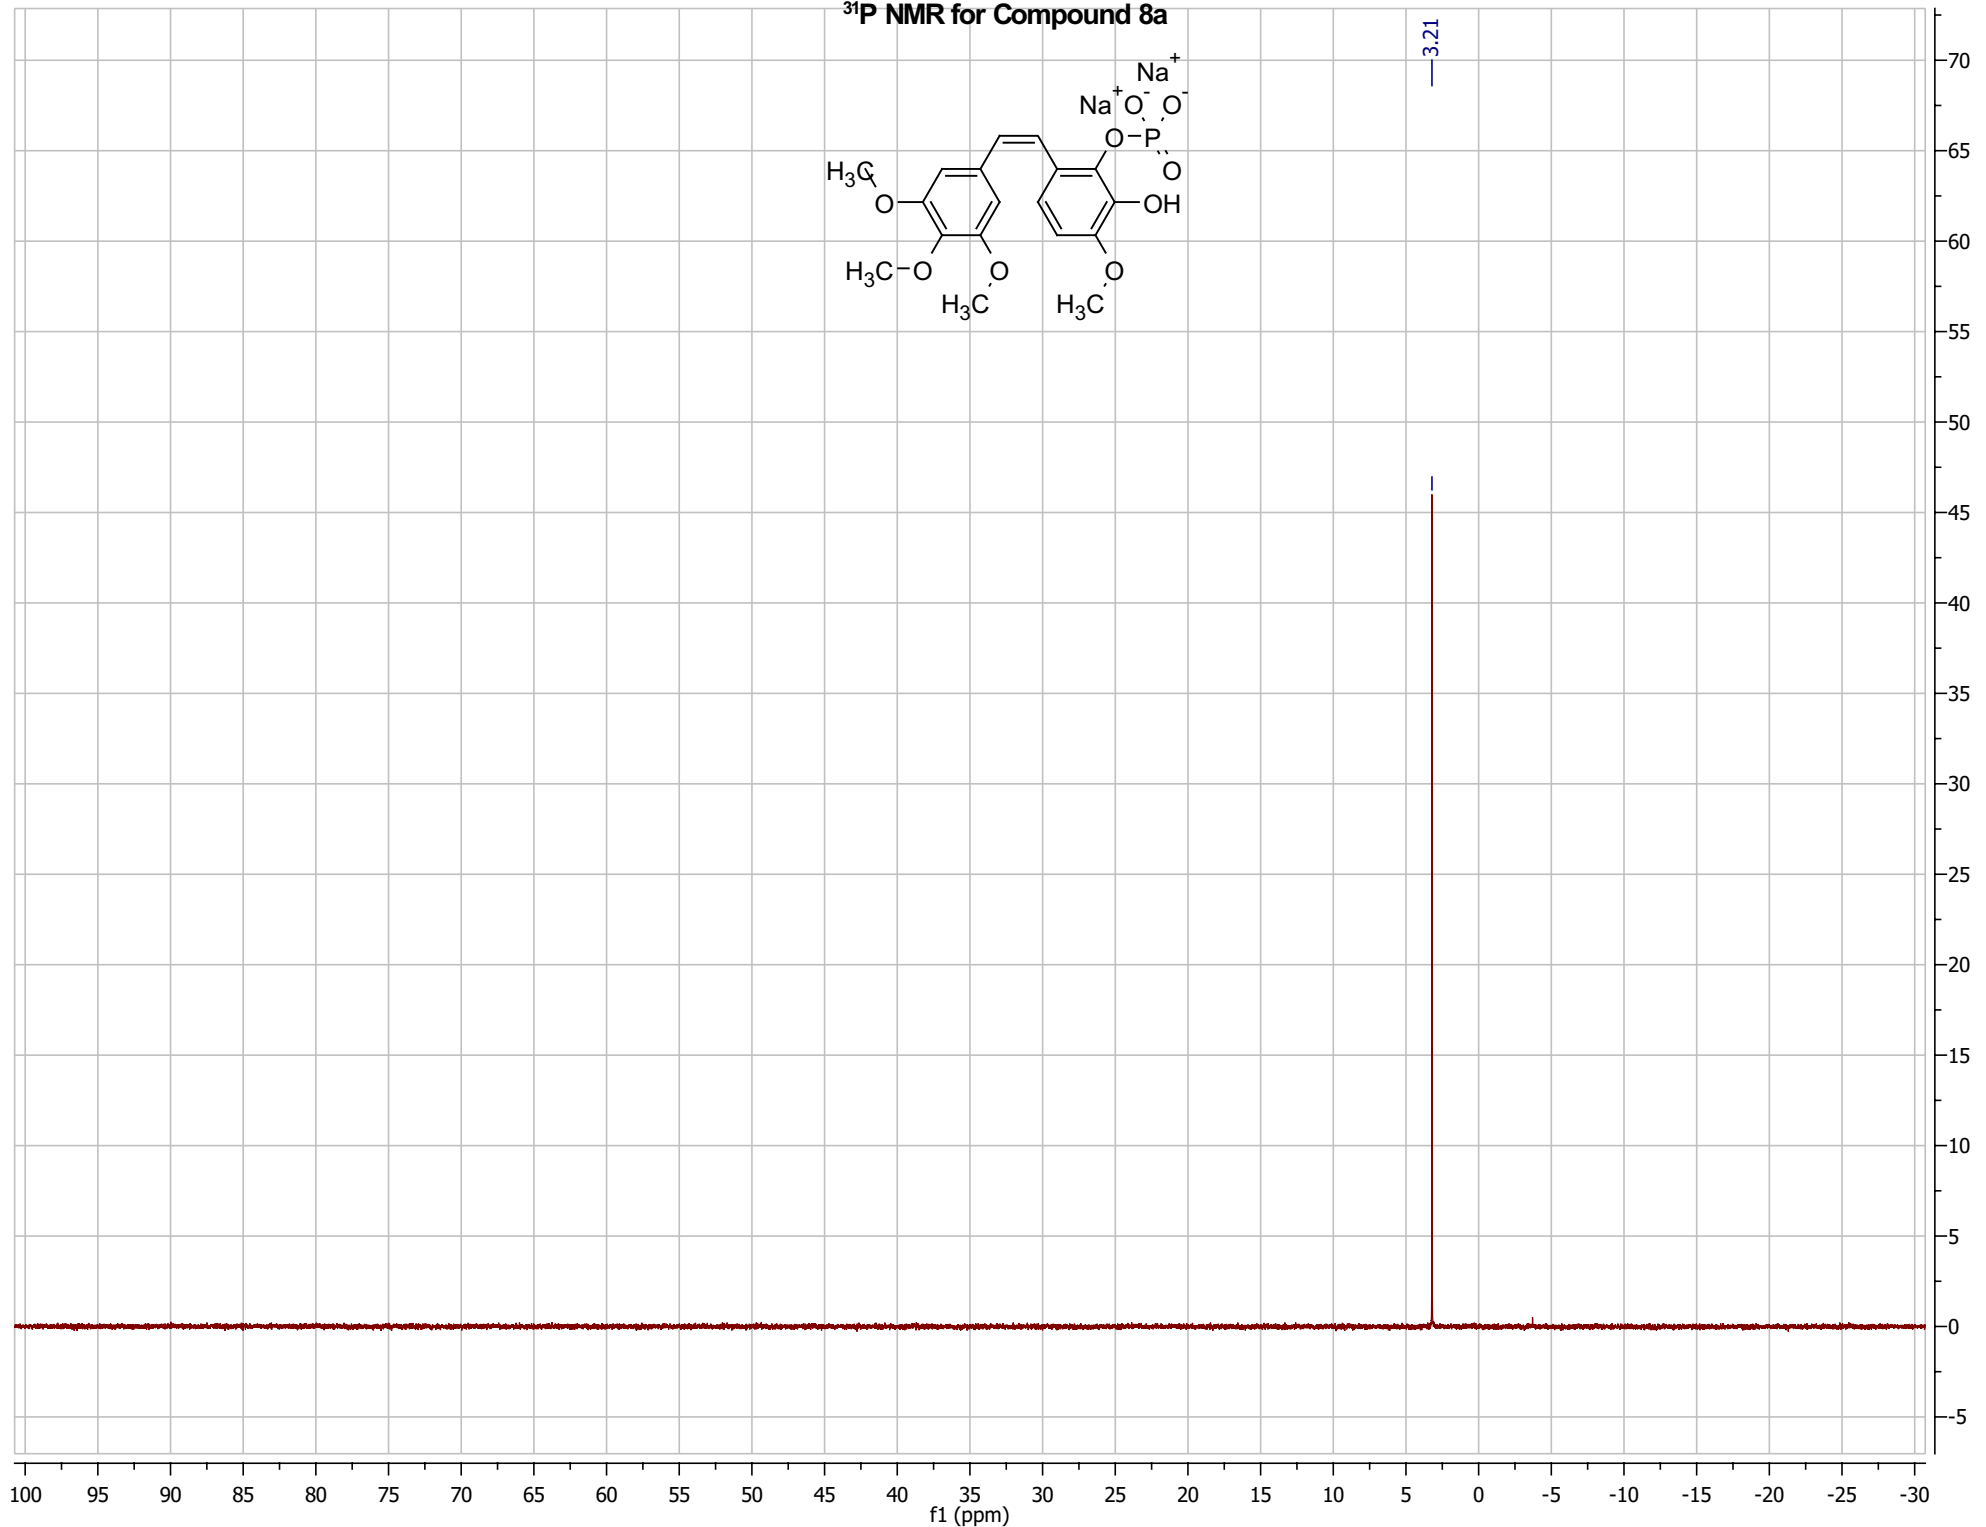



<sup>31</sup>P NMR for Compound 8b

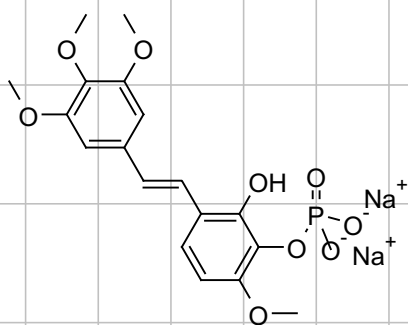

— 3.5376

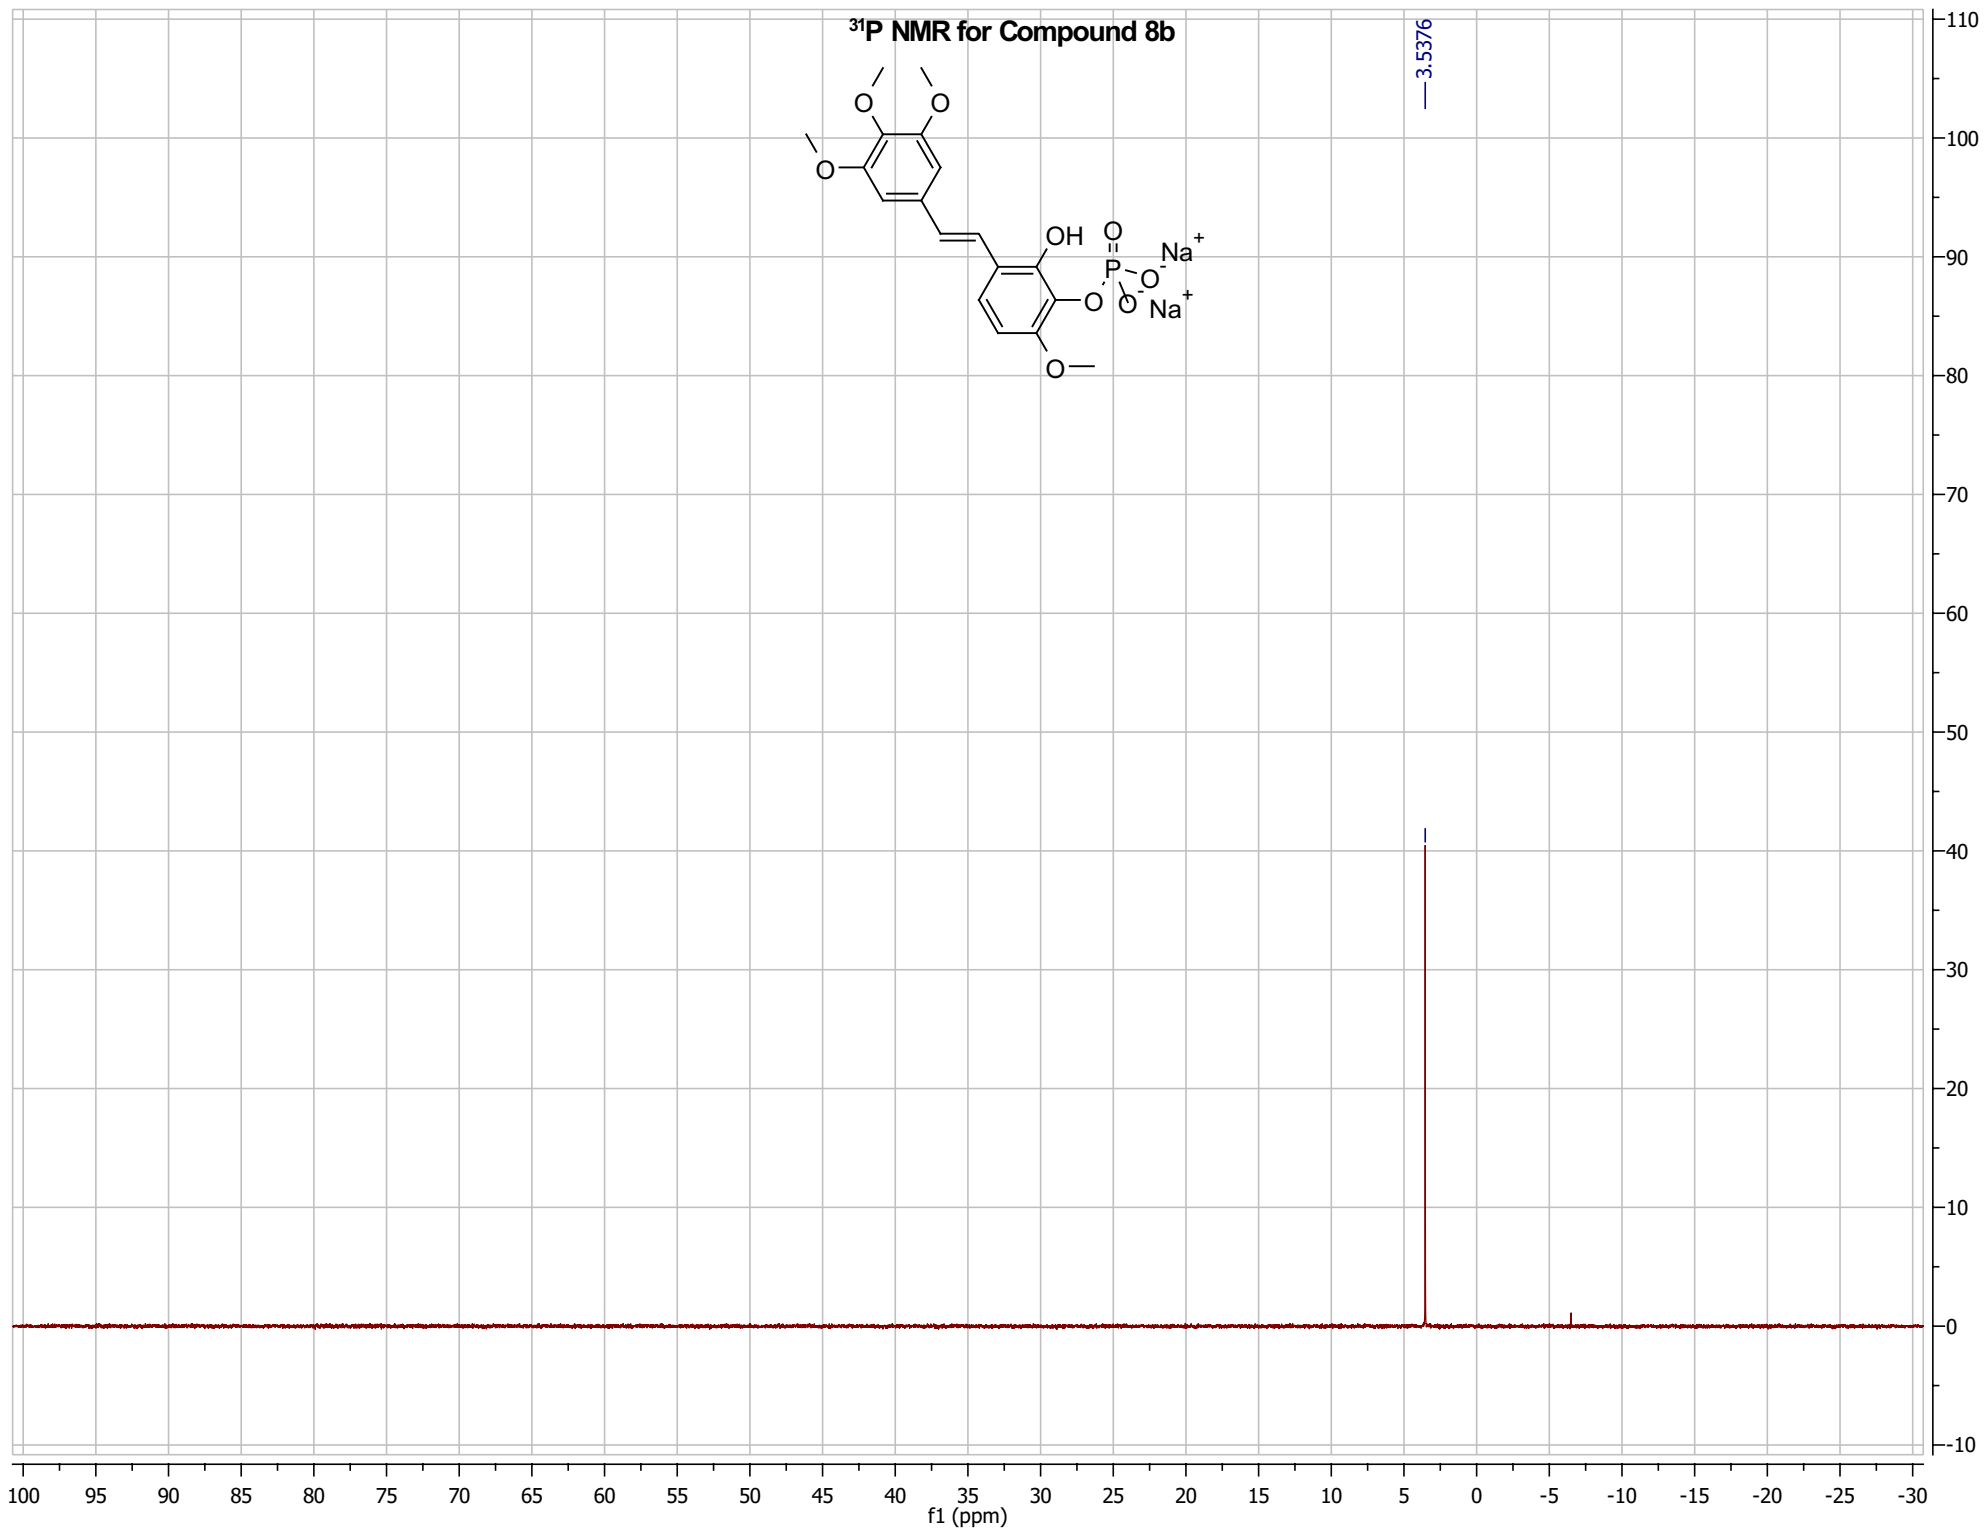

gHSQC for Compound 2a

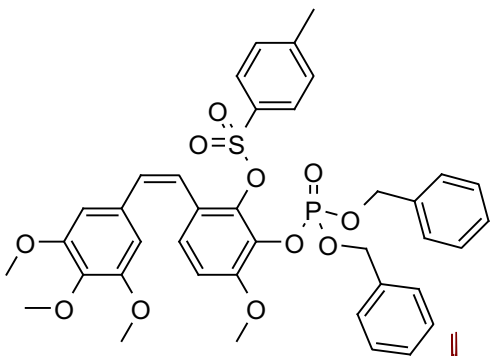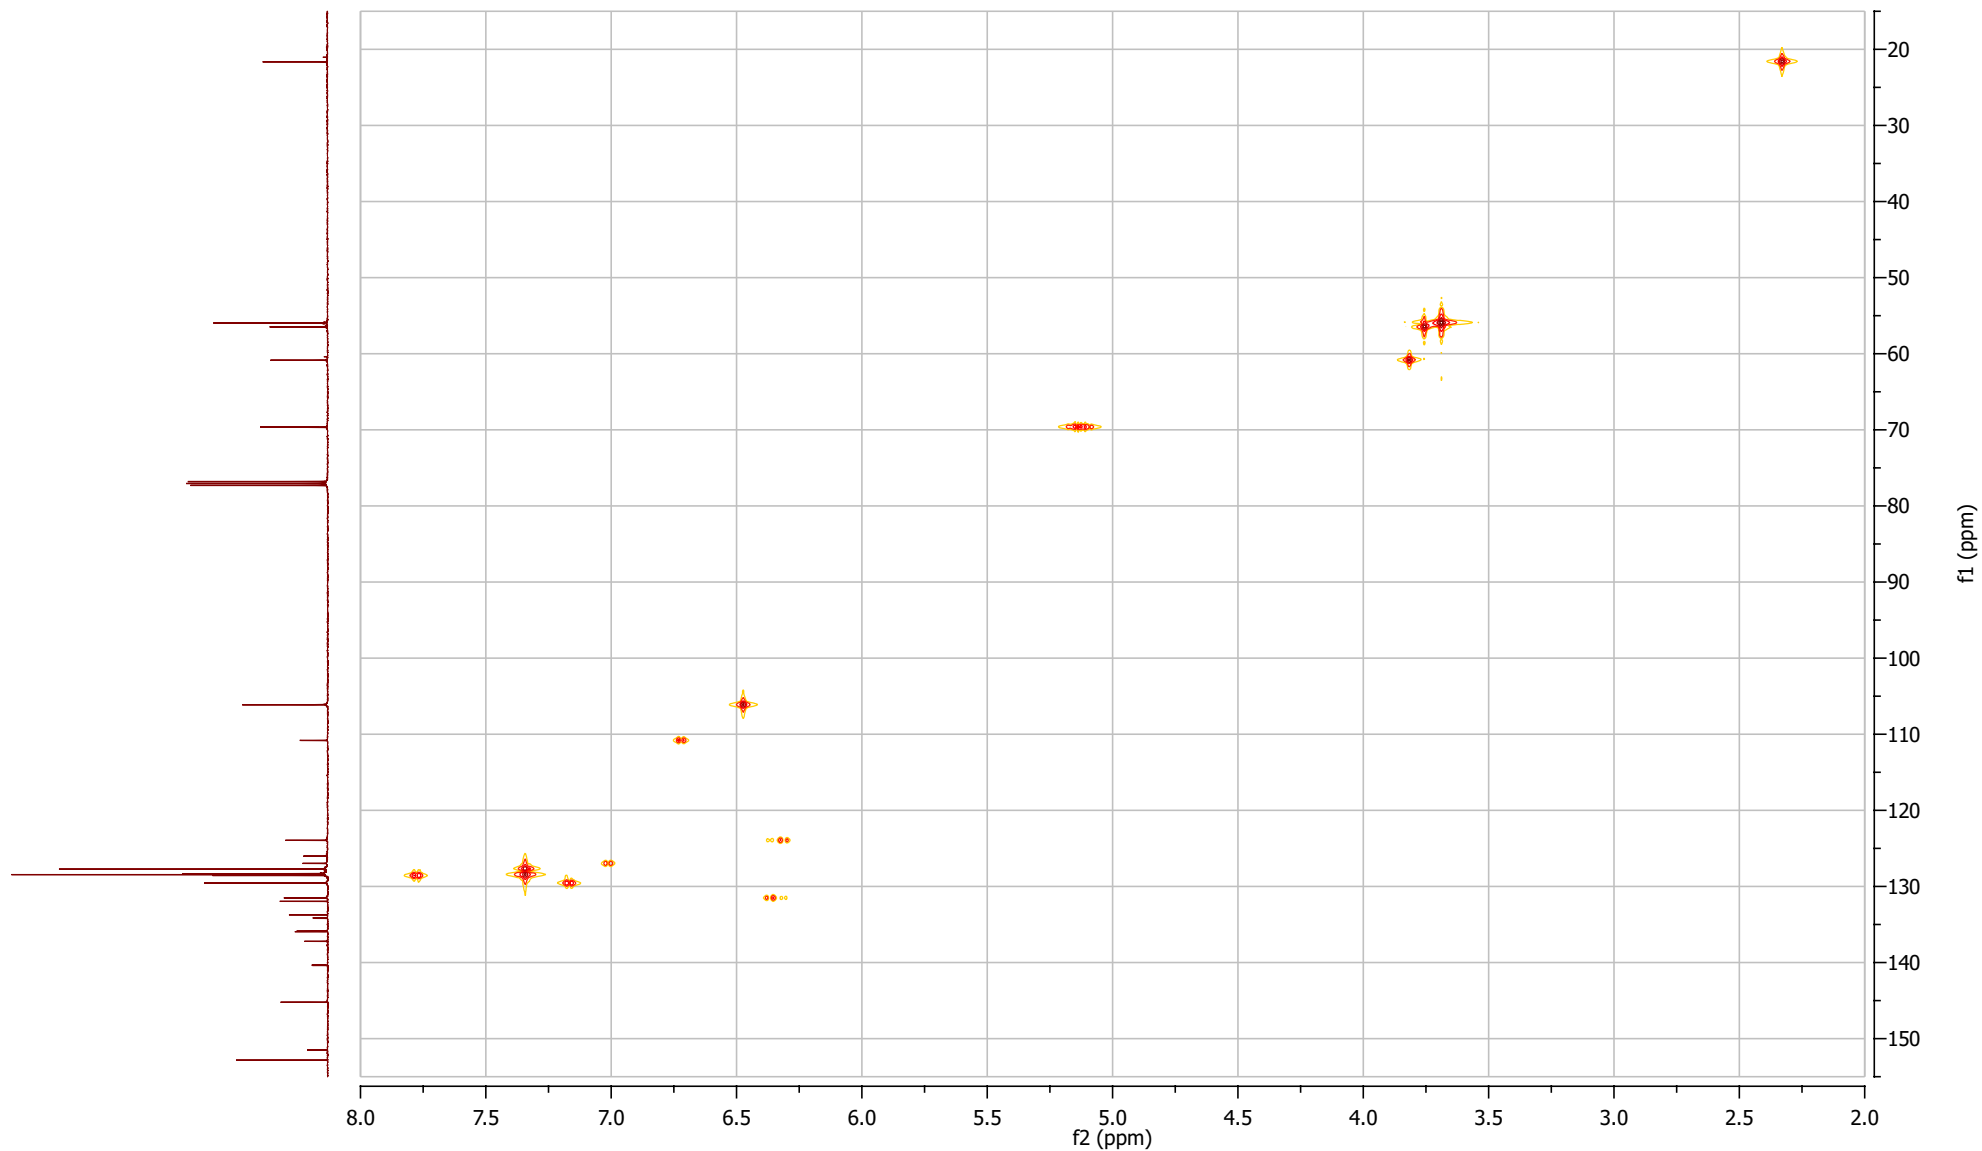

gHSQC for Compound 2b

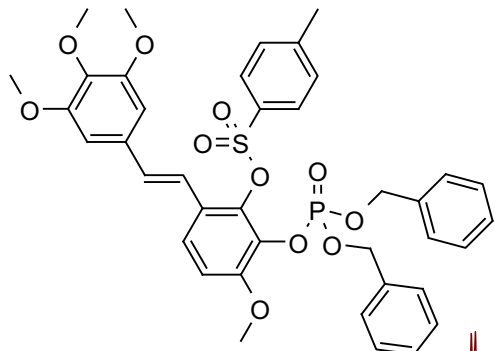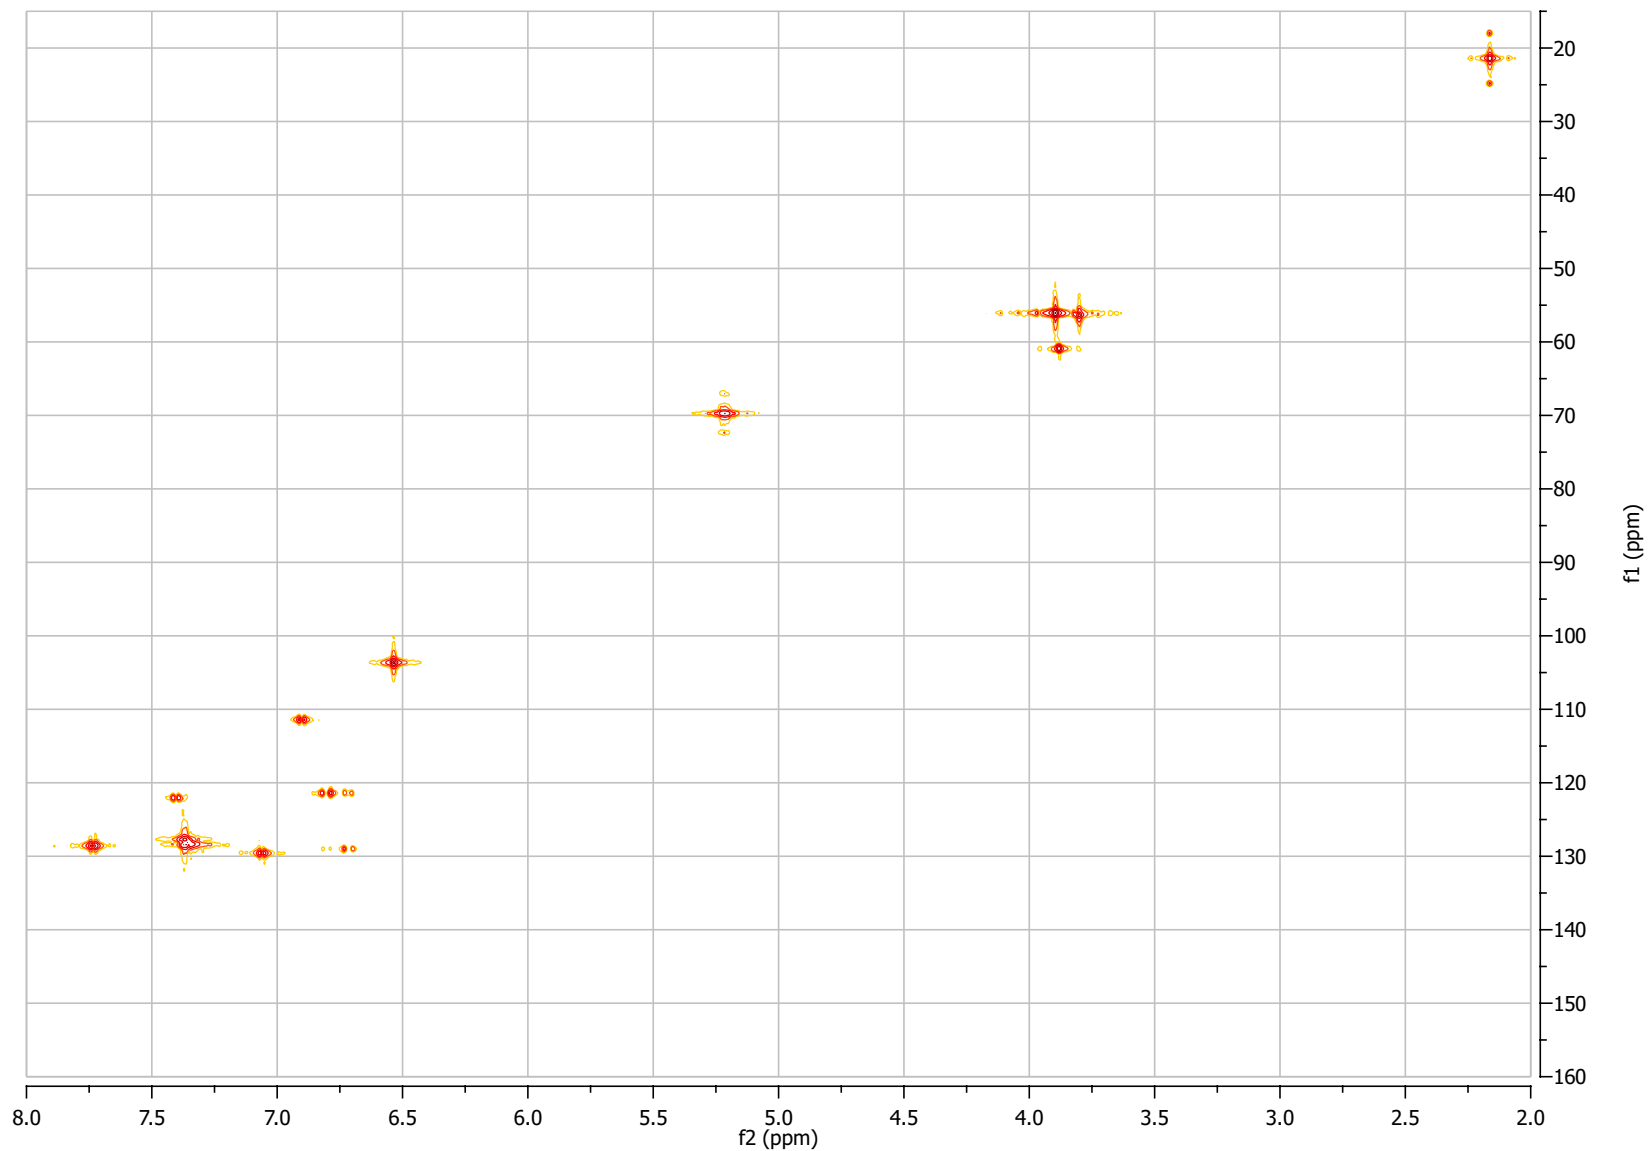

gHSQC for Compound 3a

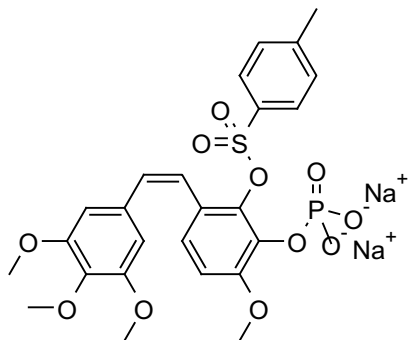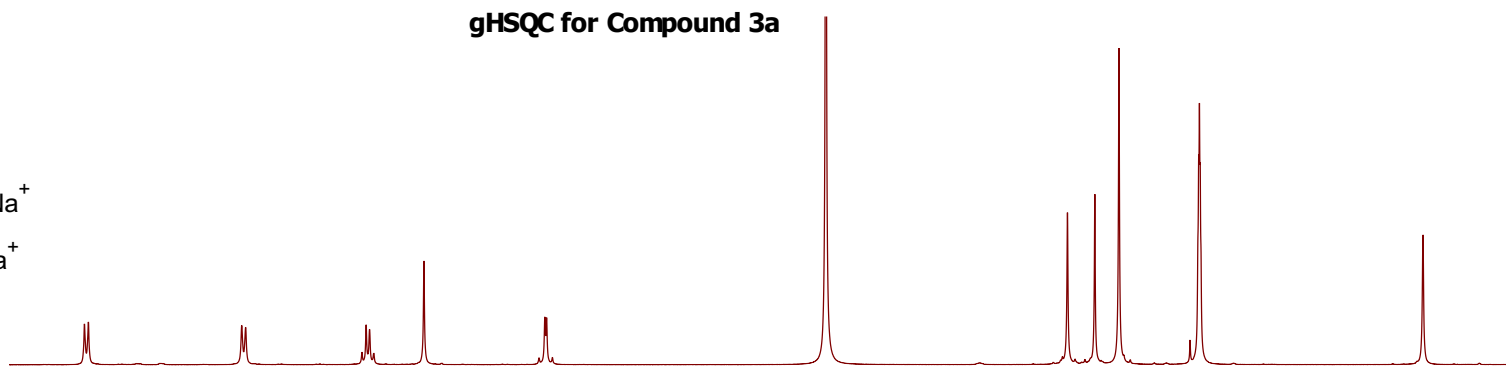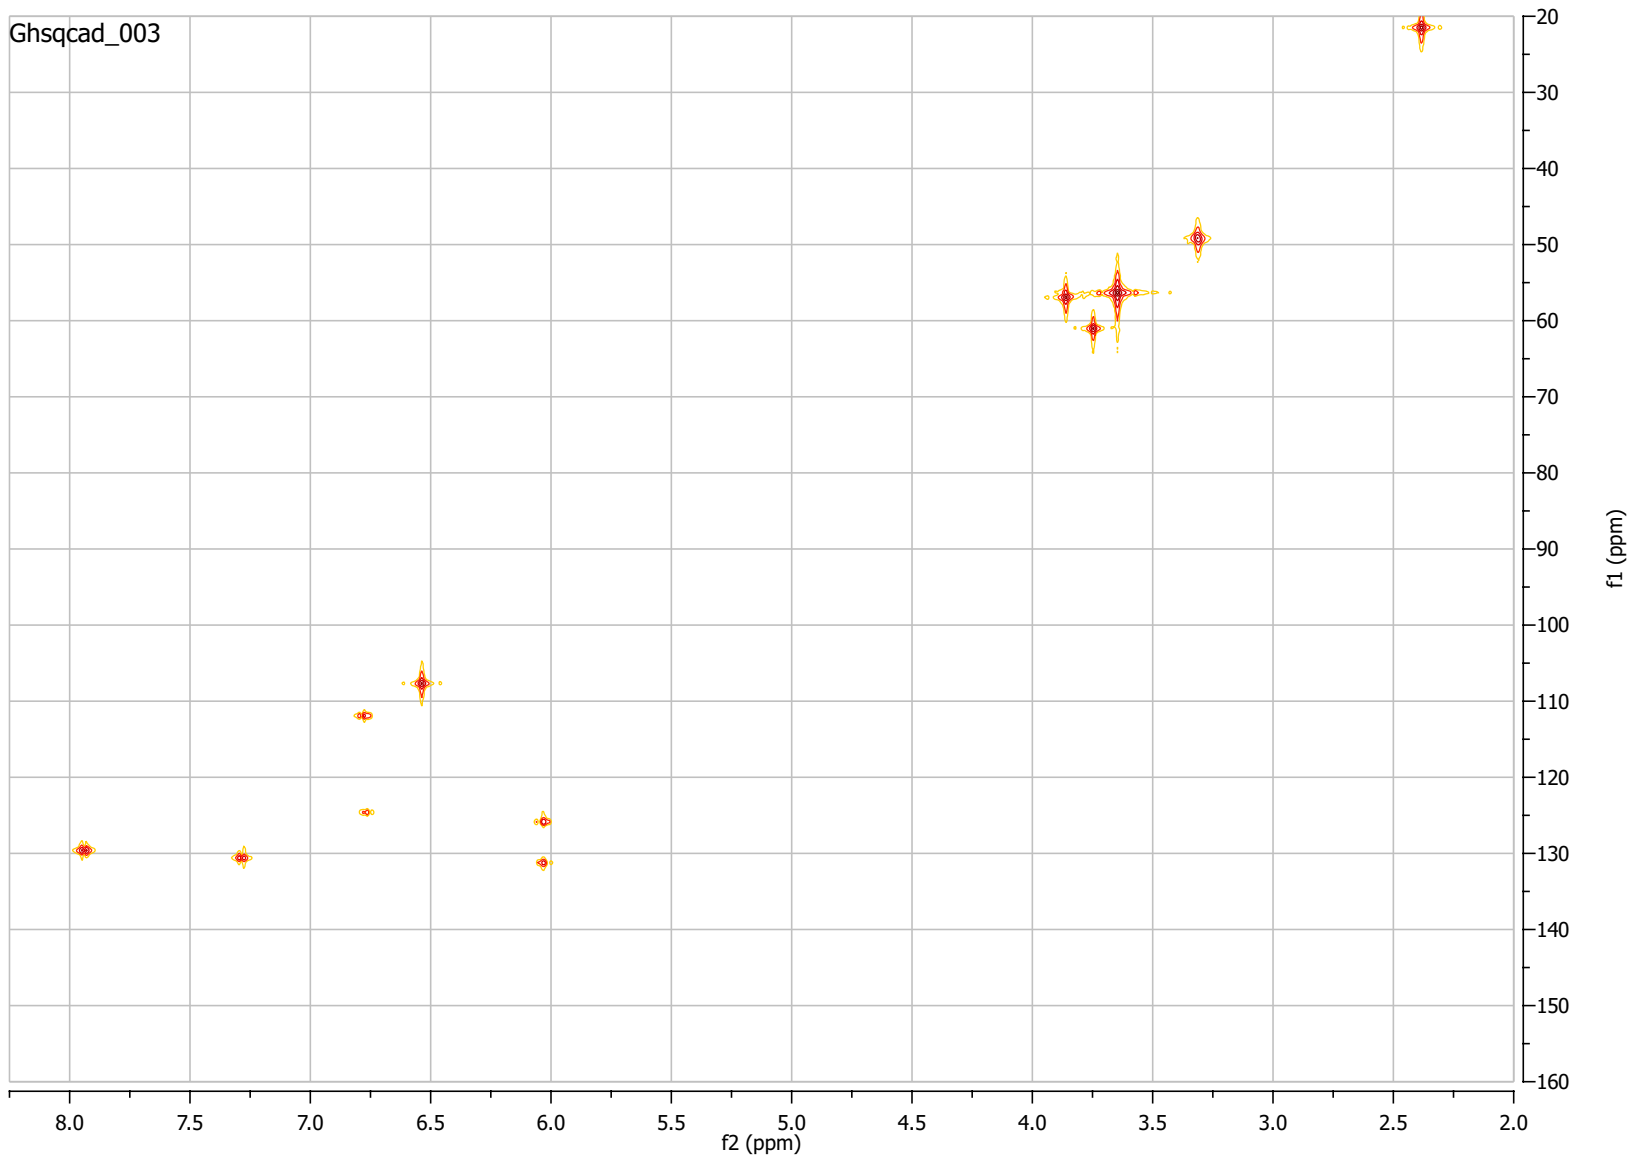

gHSQC for Compound 4a

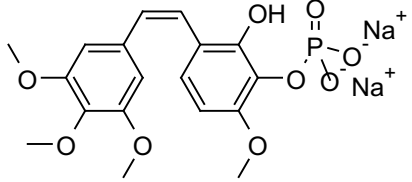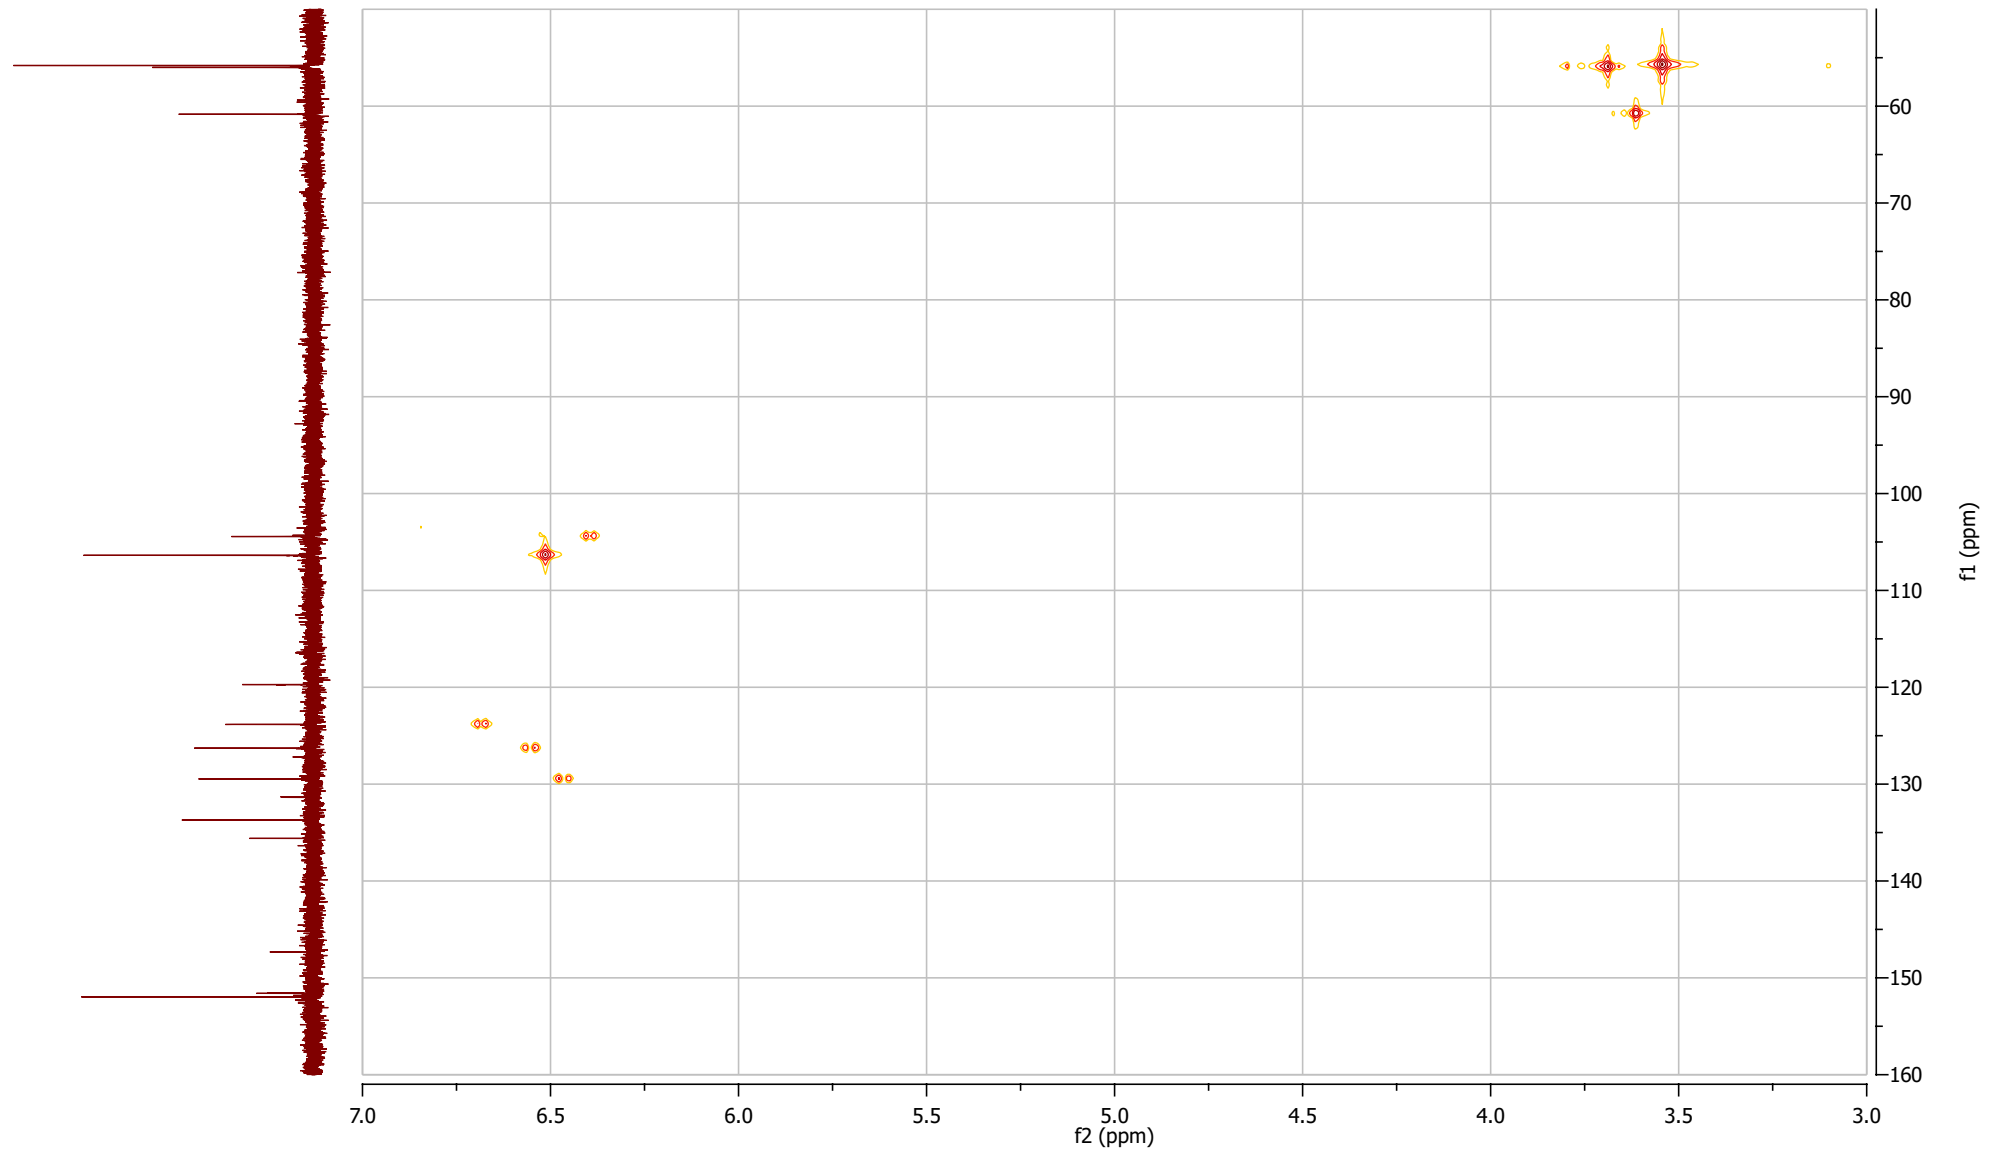

gHSQC for Compound 4b

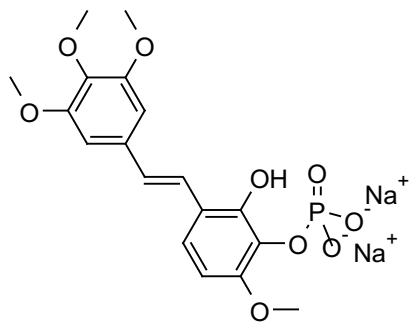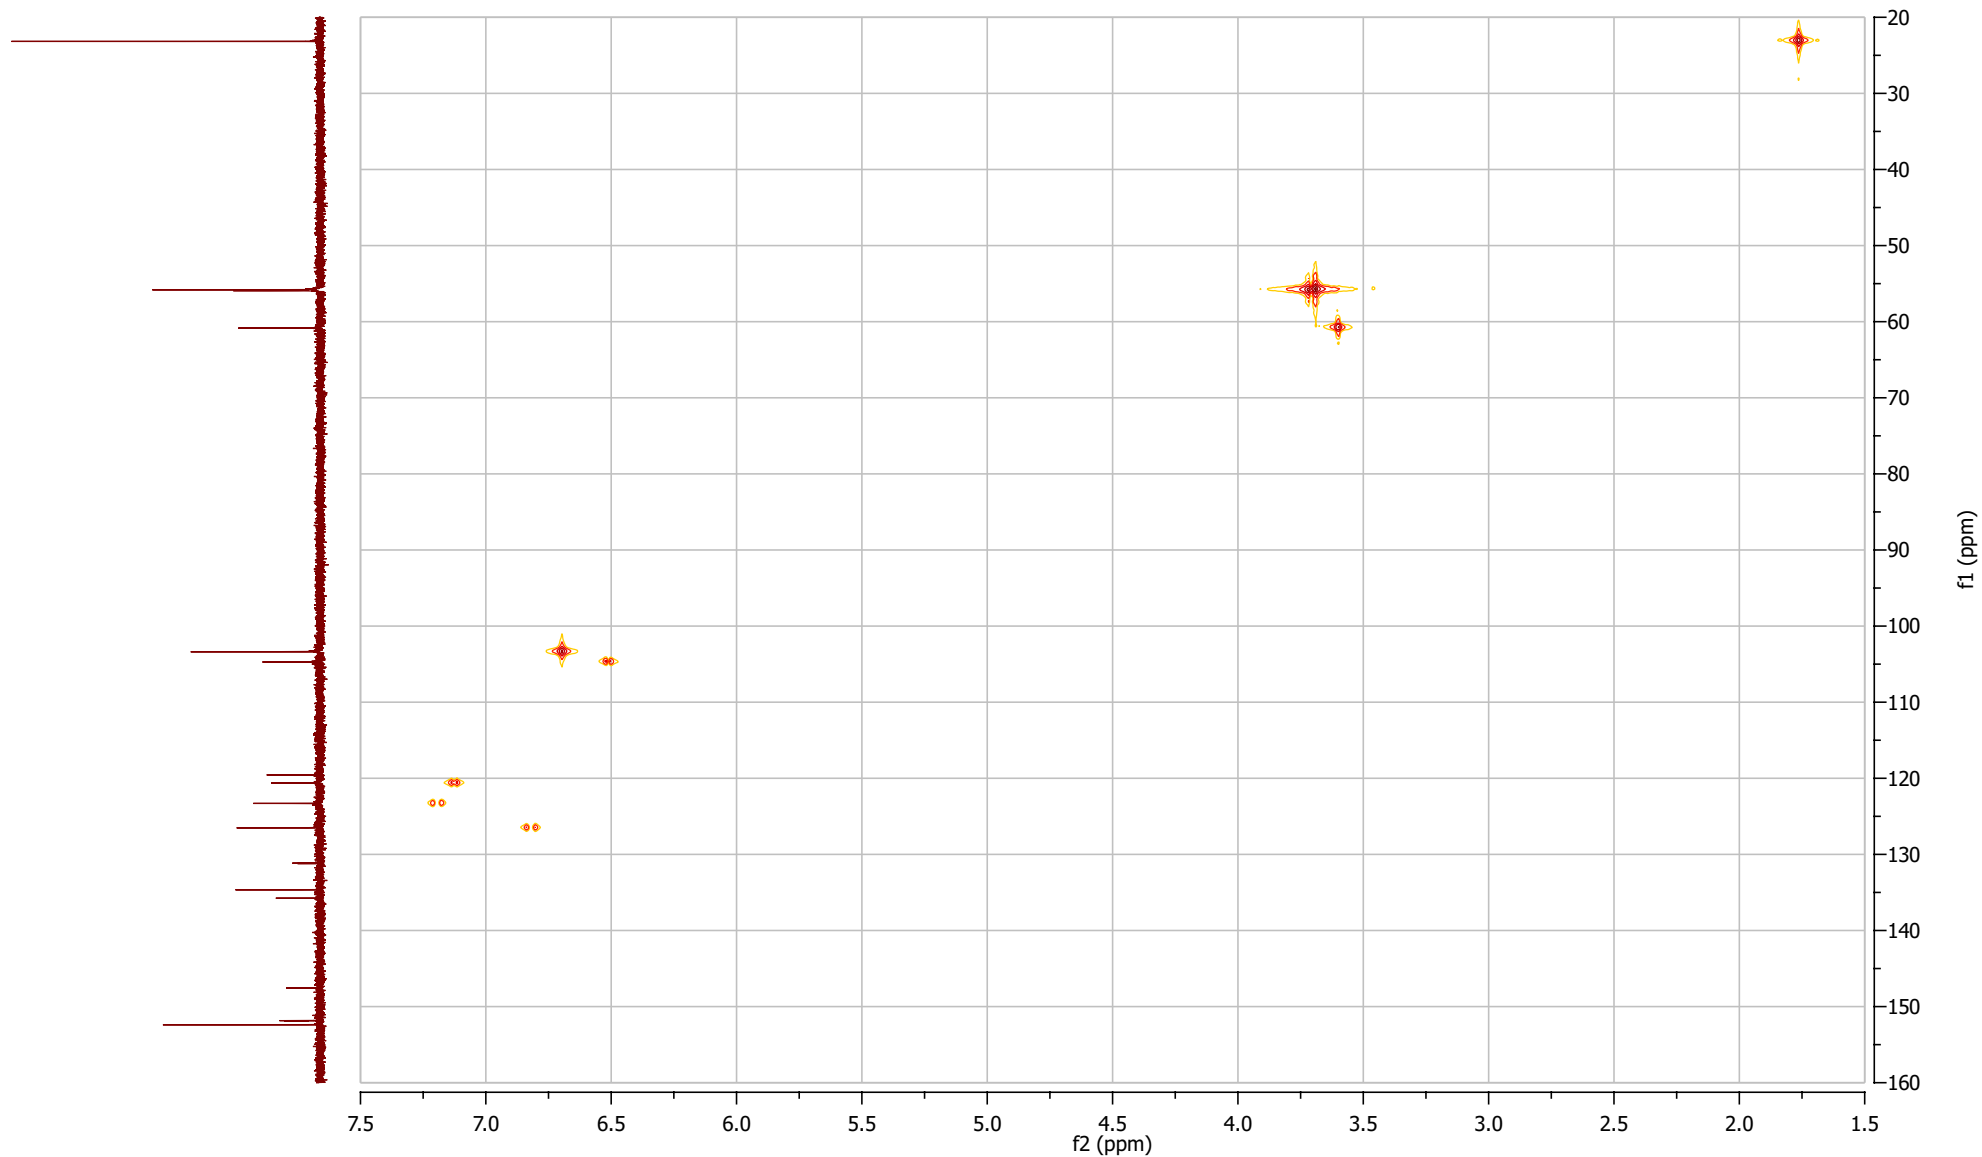

gHSQC for Compound 6a

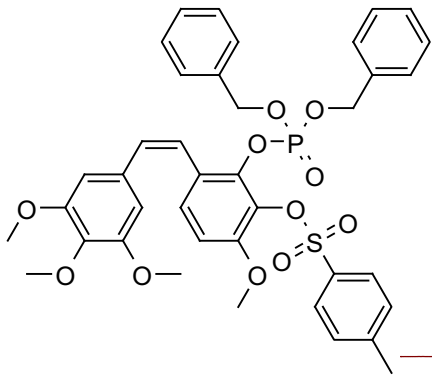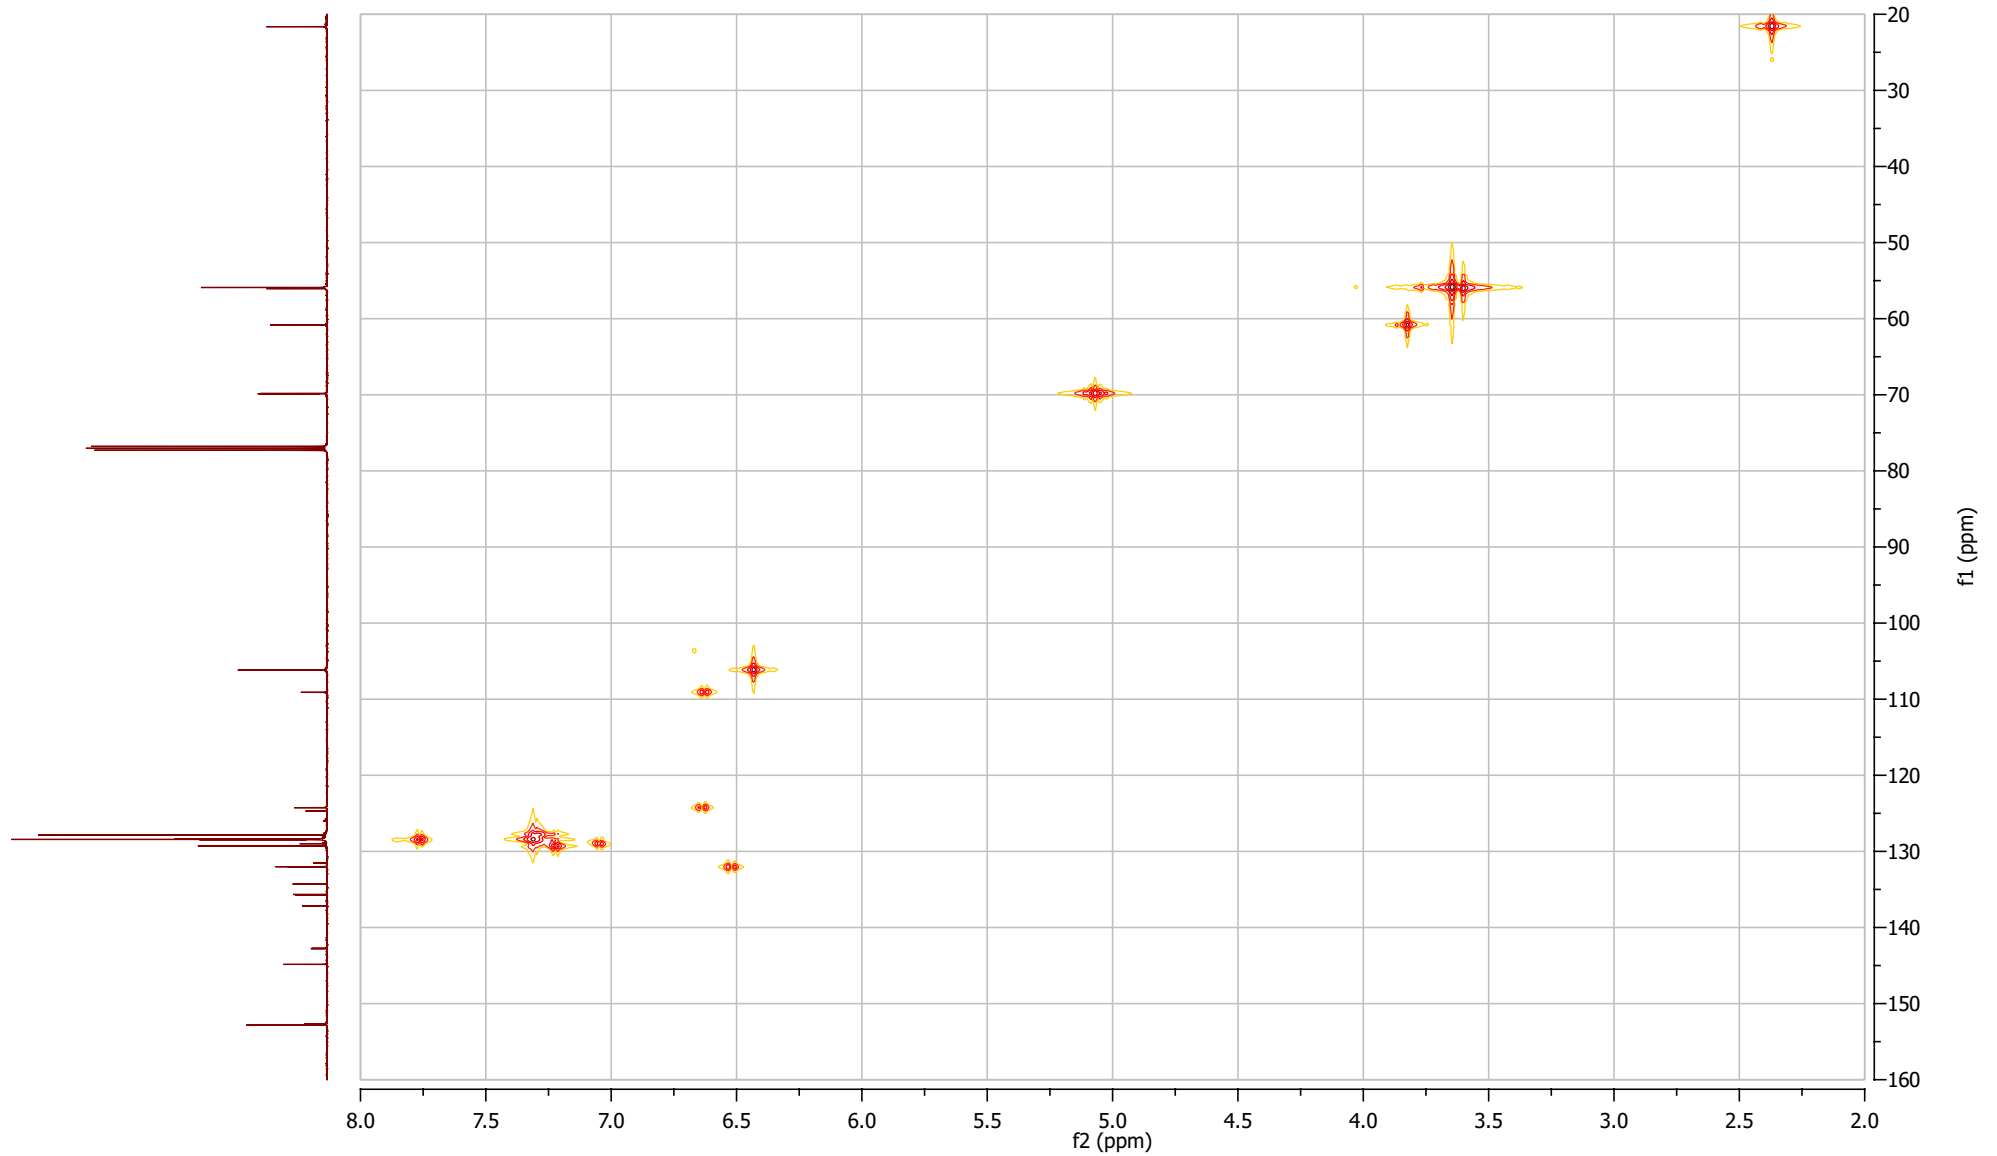

gHSQC for Compound 6b

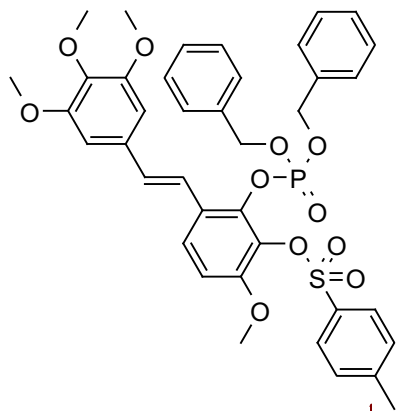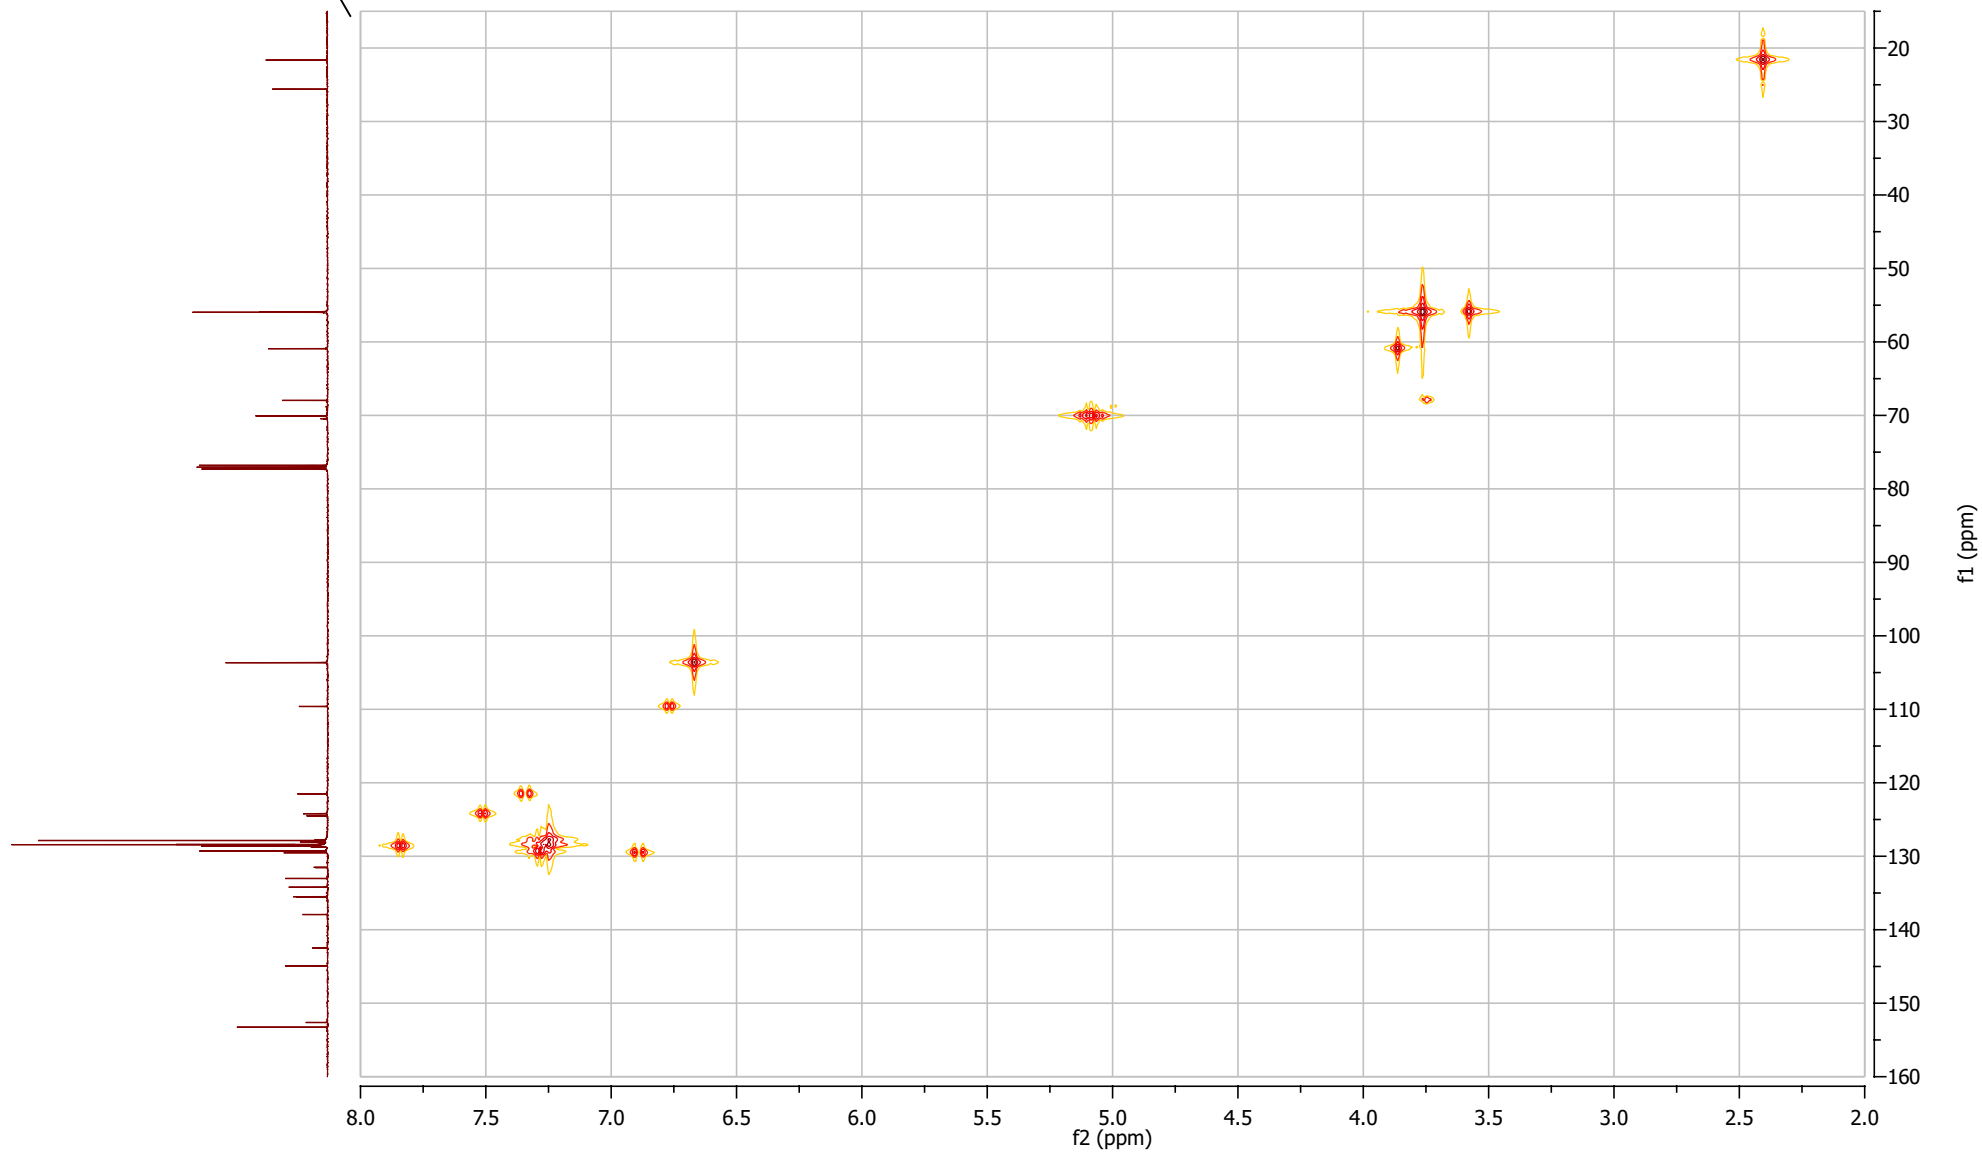



gHSQC for Compound 7a

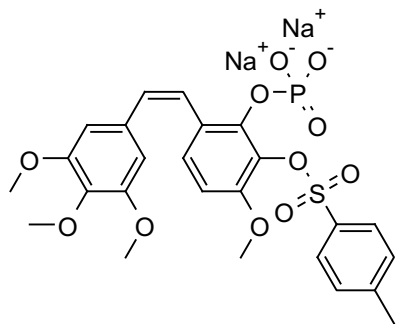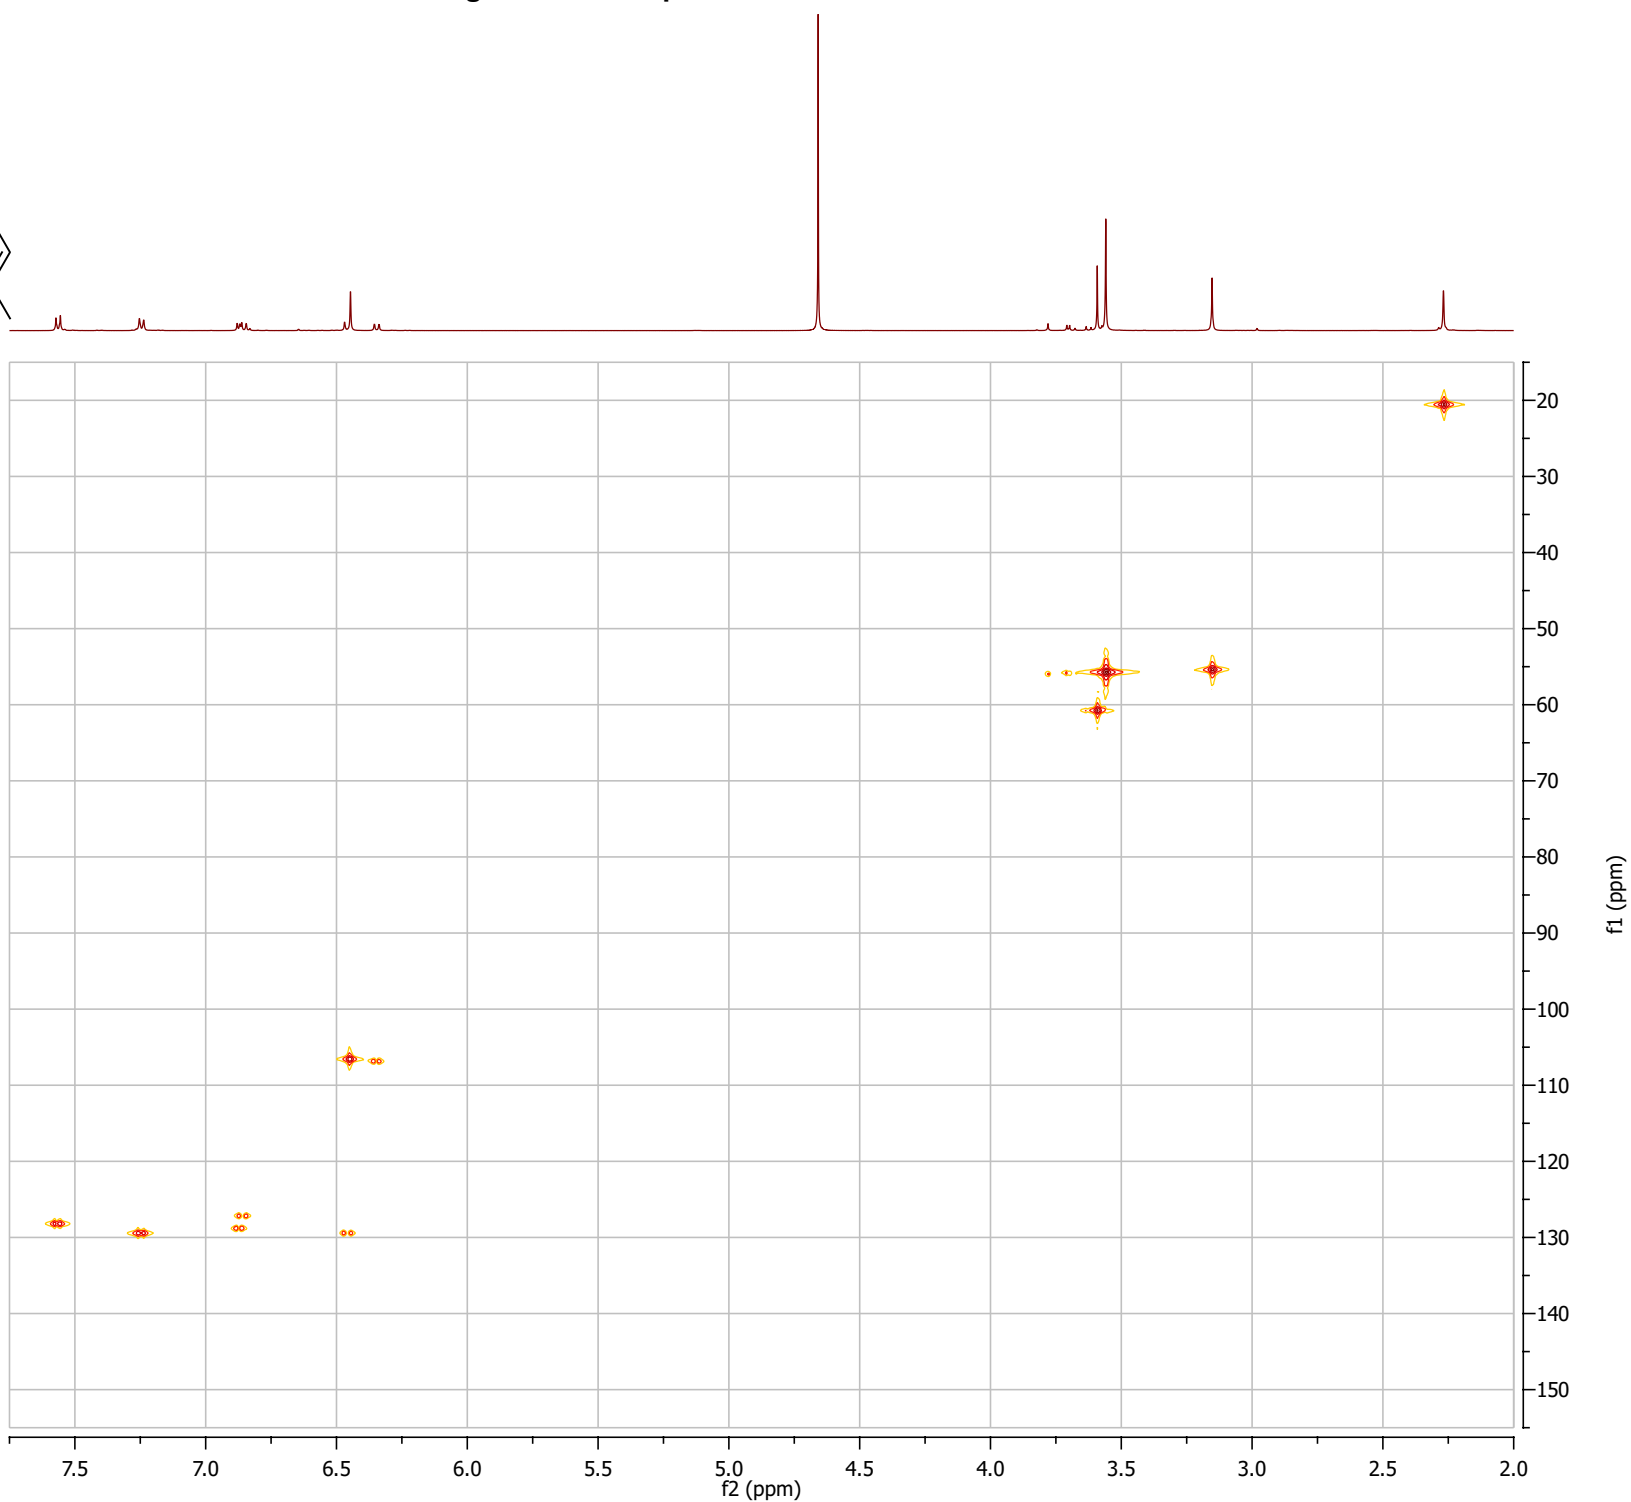

gHSQC for Compound 7b

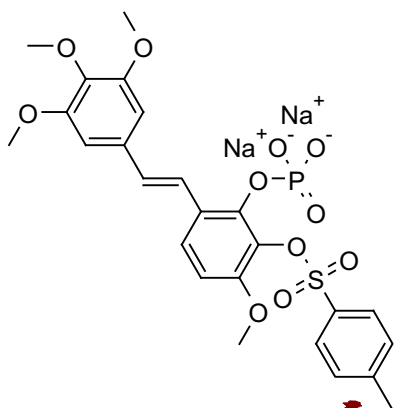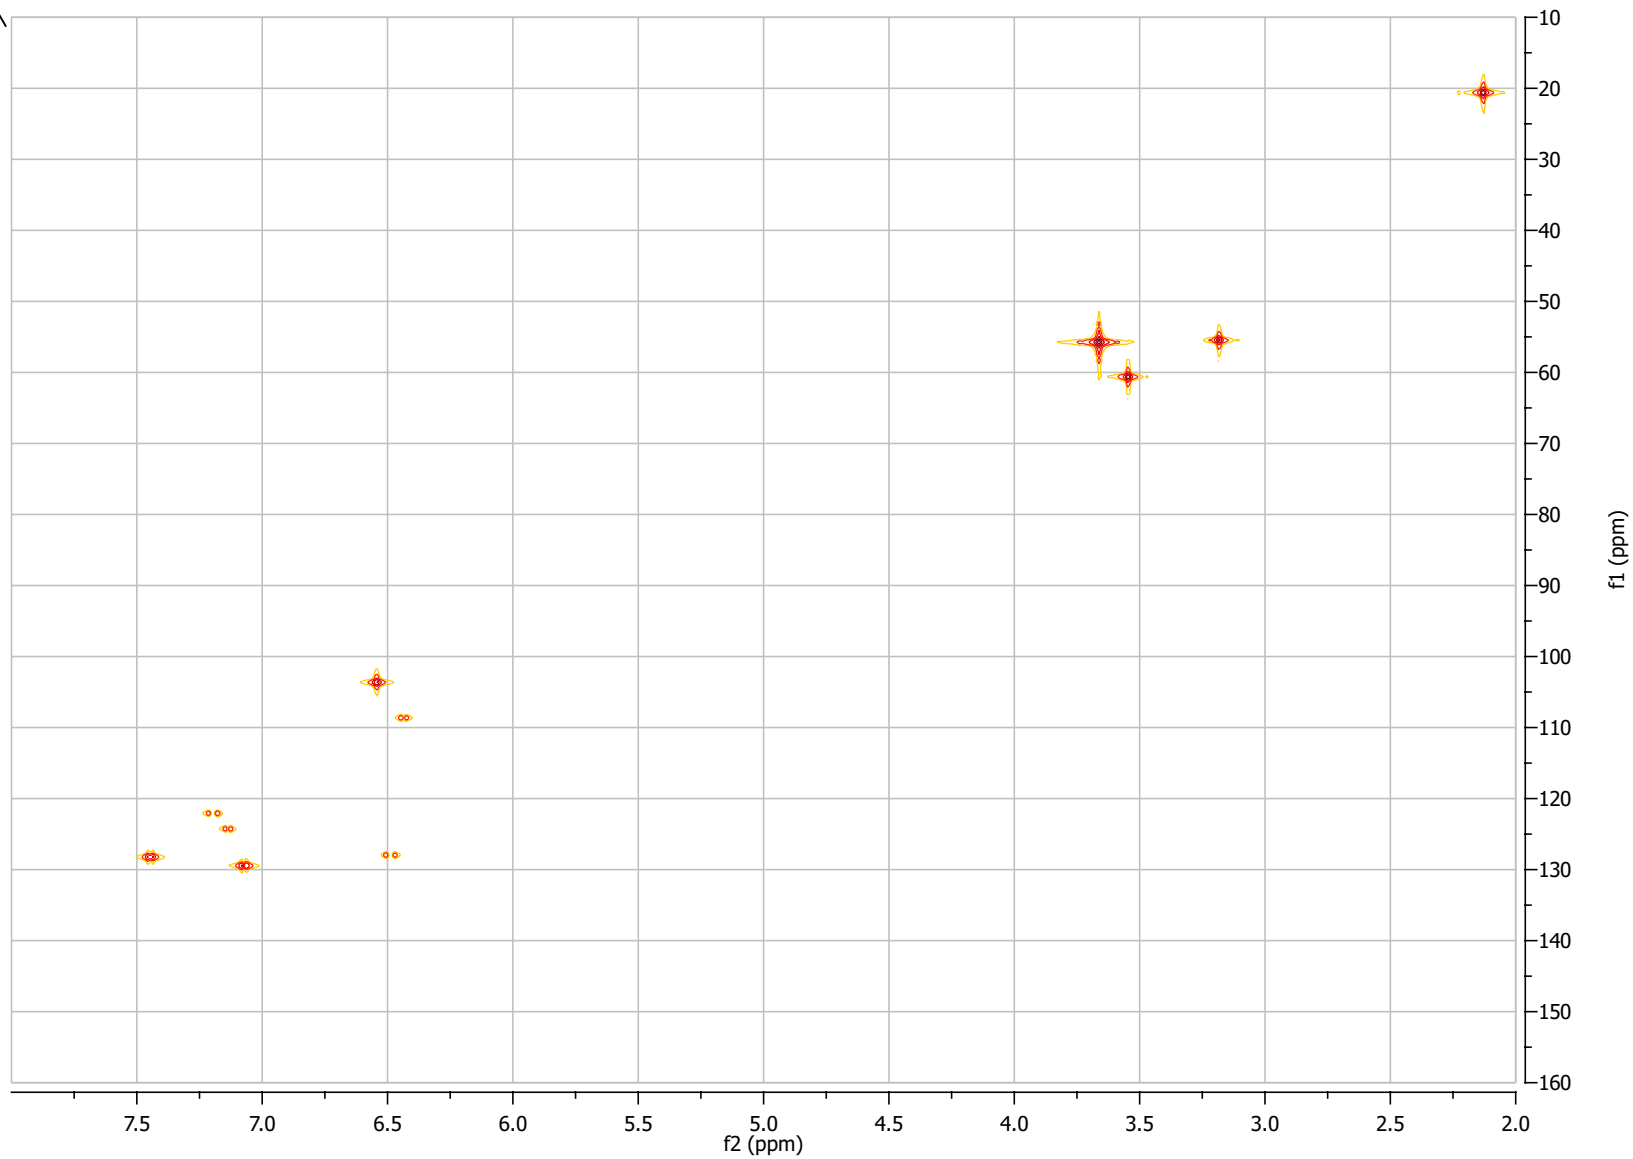

gHSQC for Compound 8a

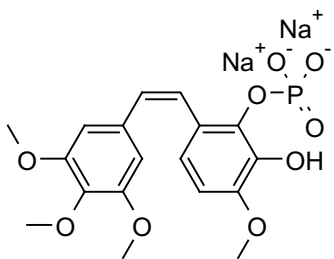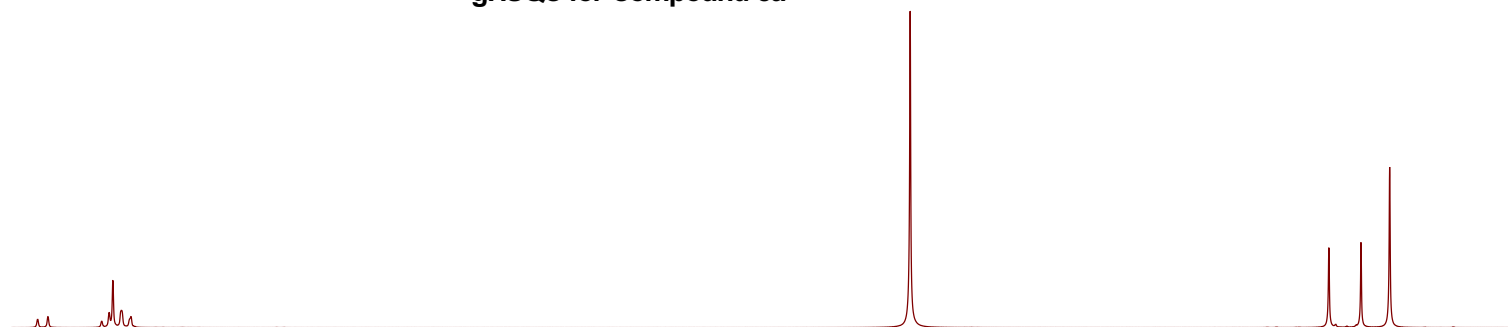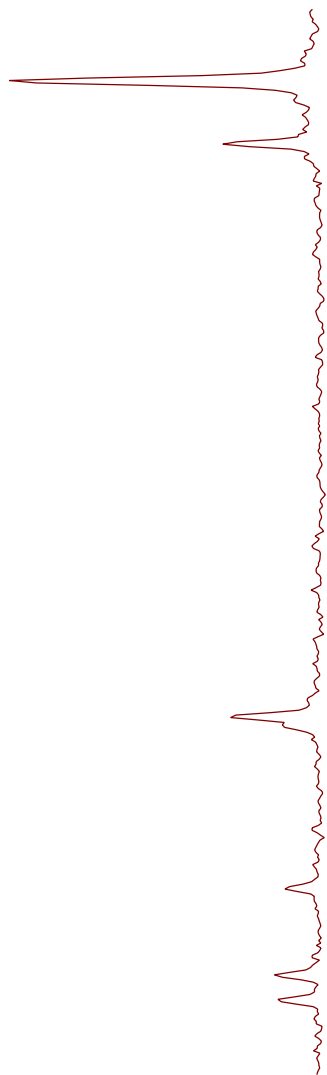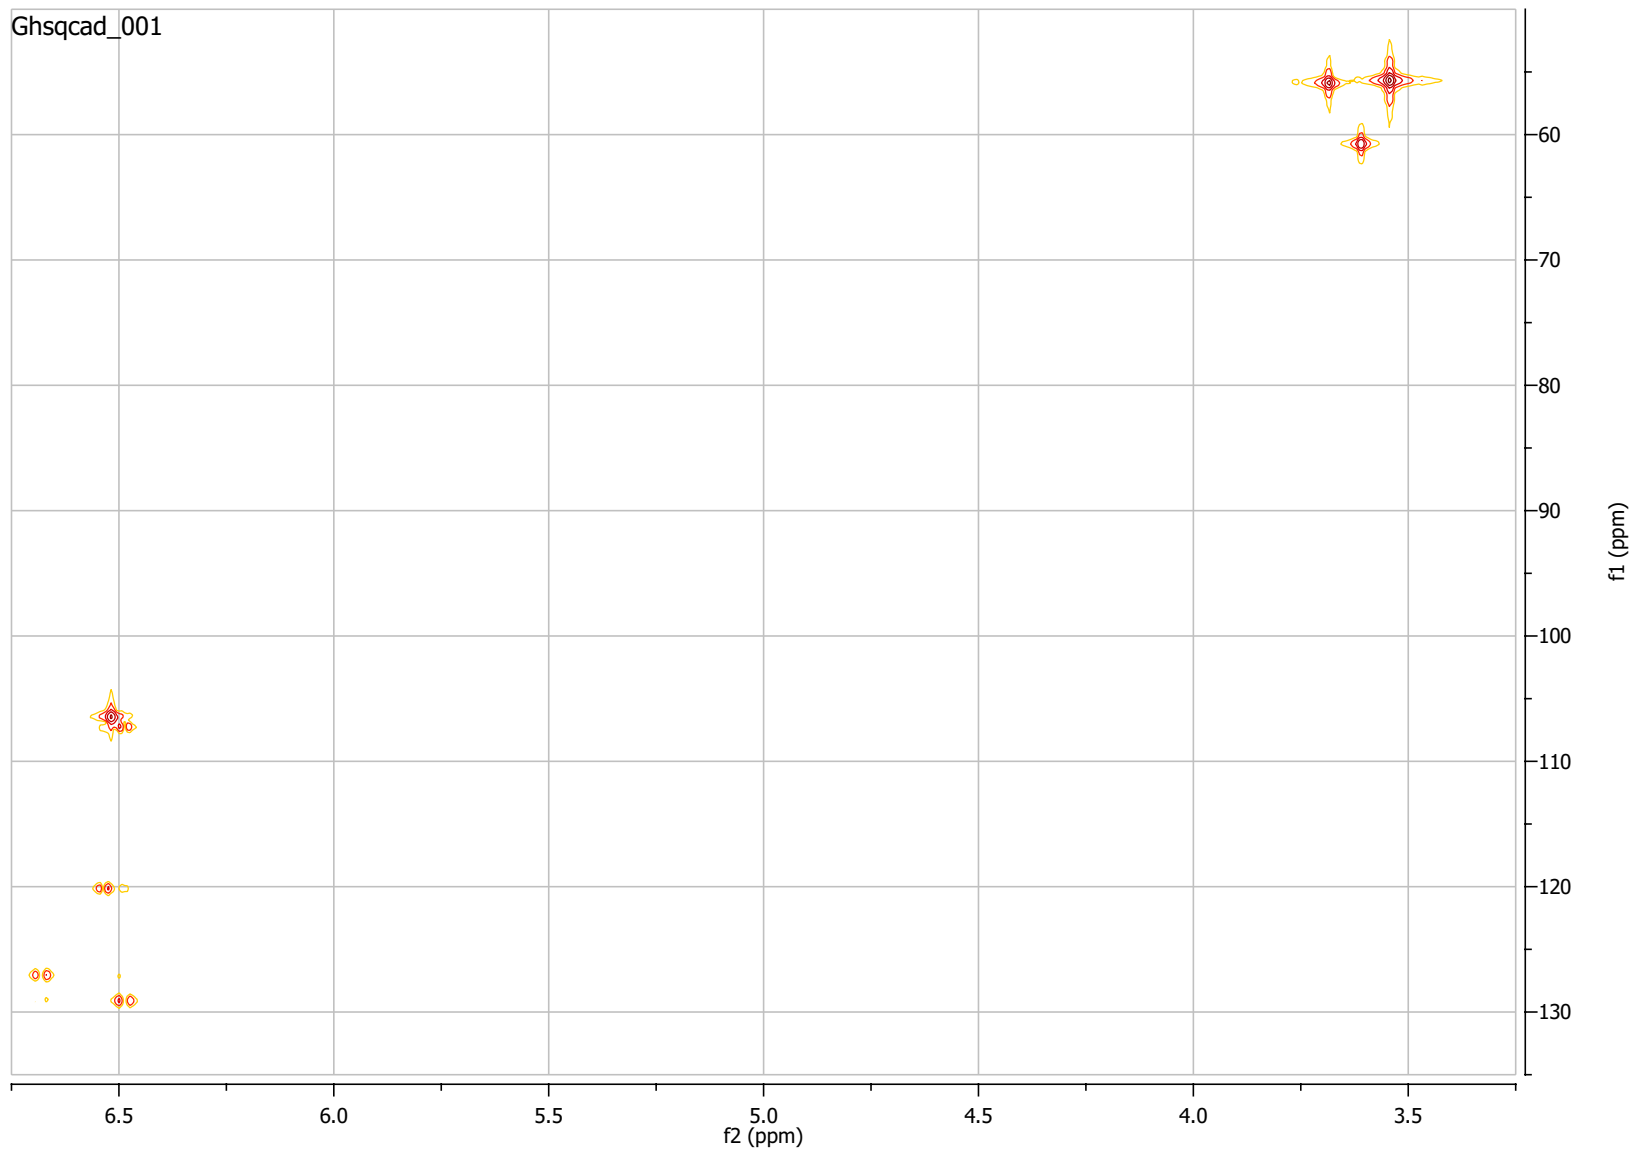

gHSQC for Compound 8b

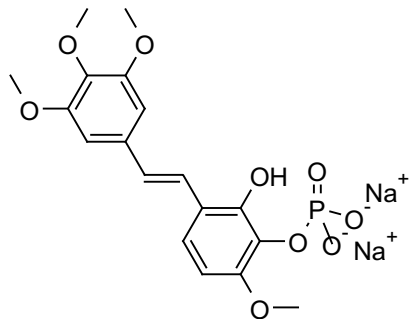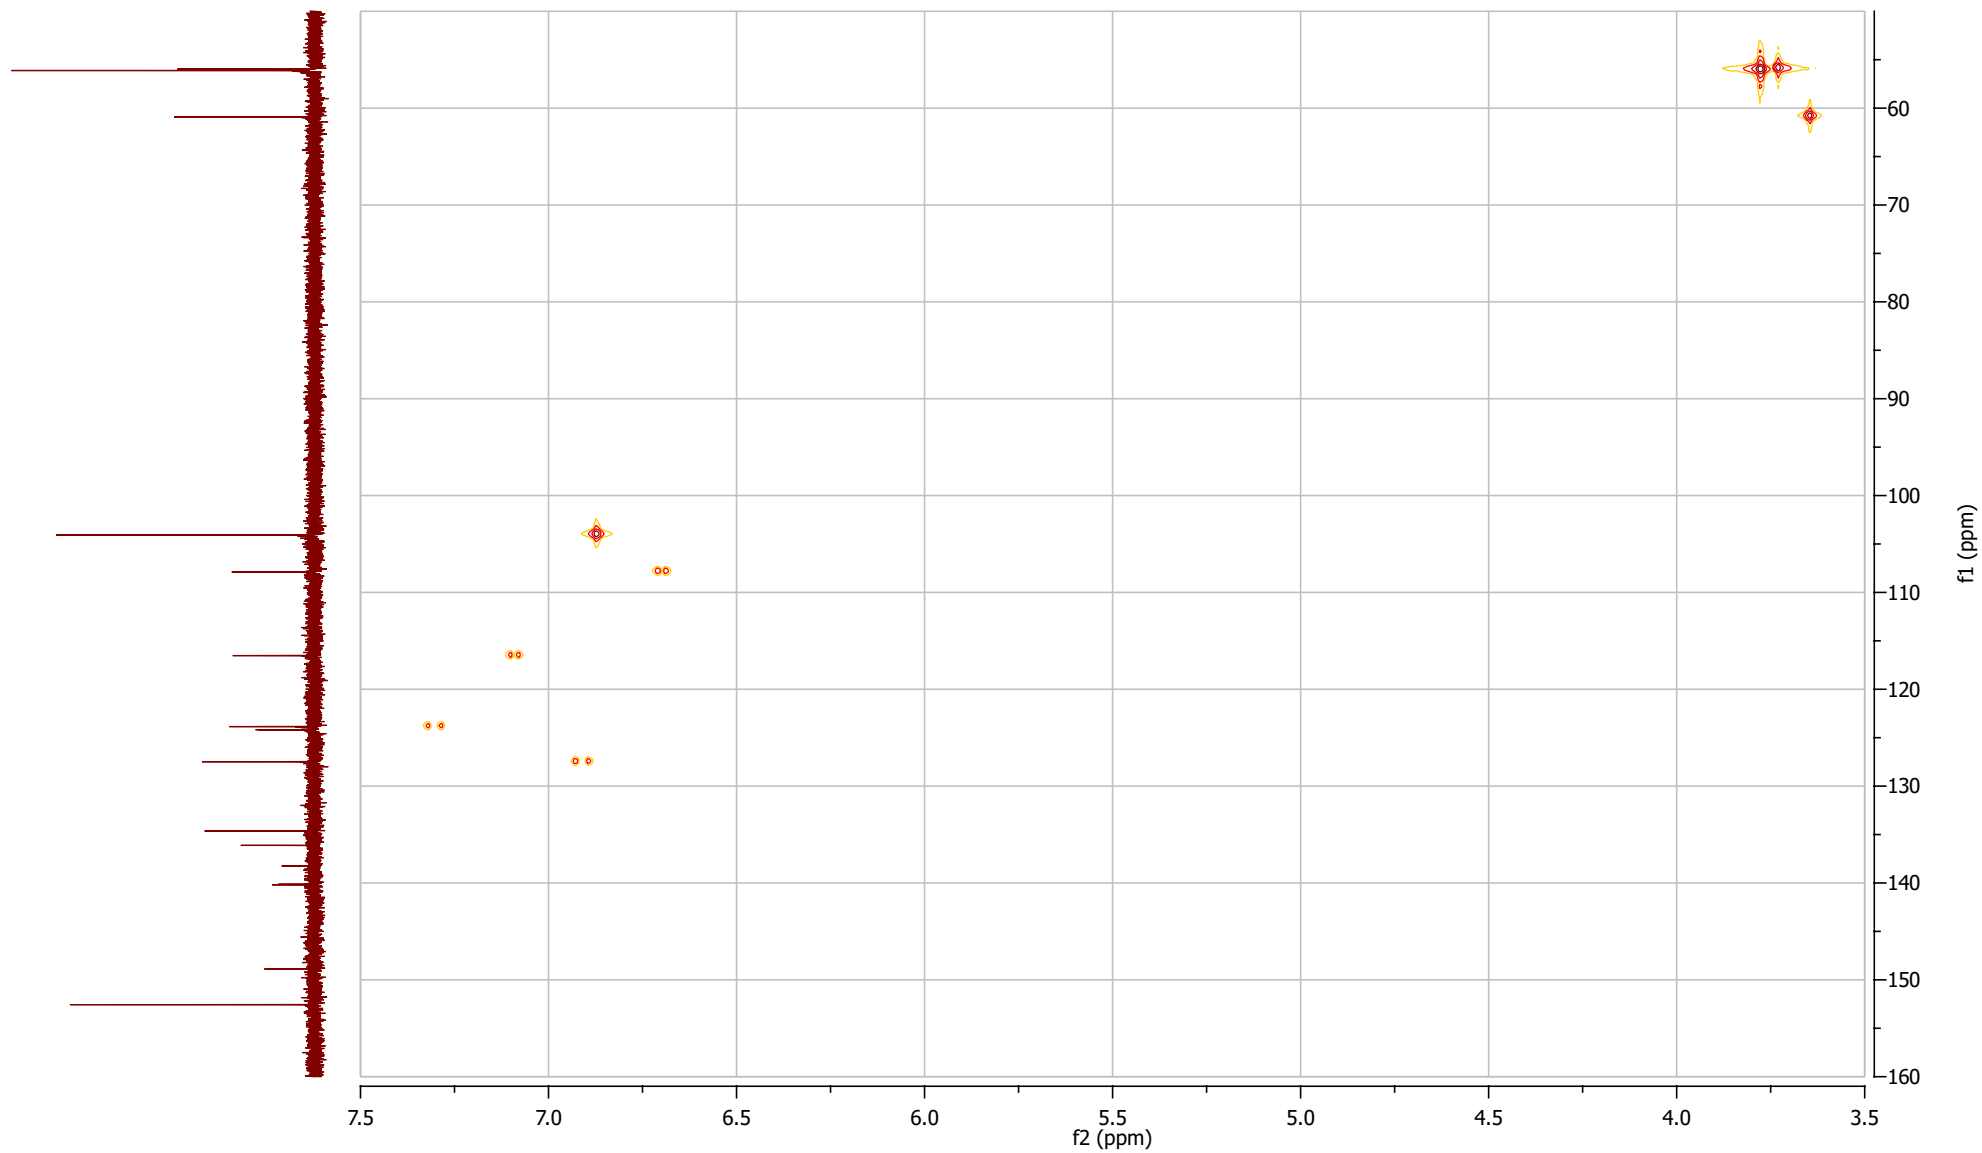

gHMBC for Compound 2a

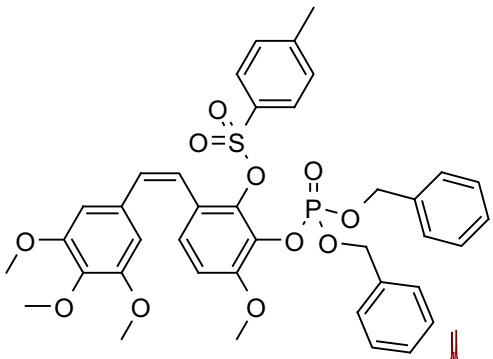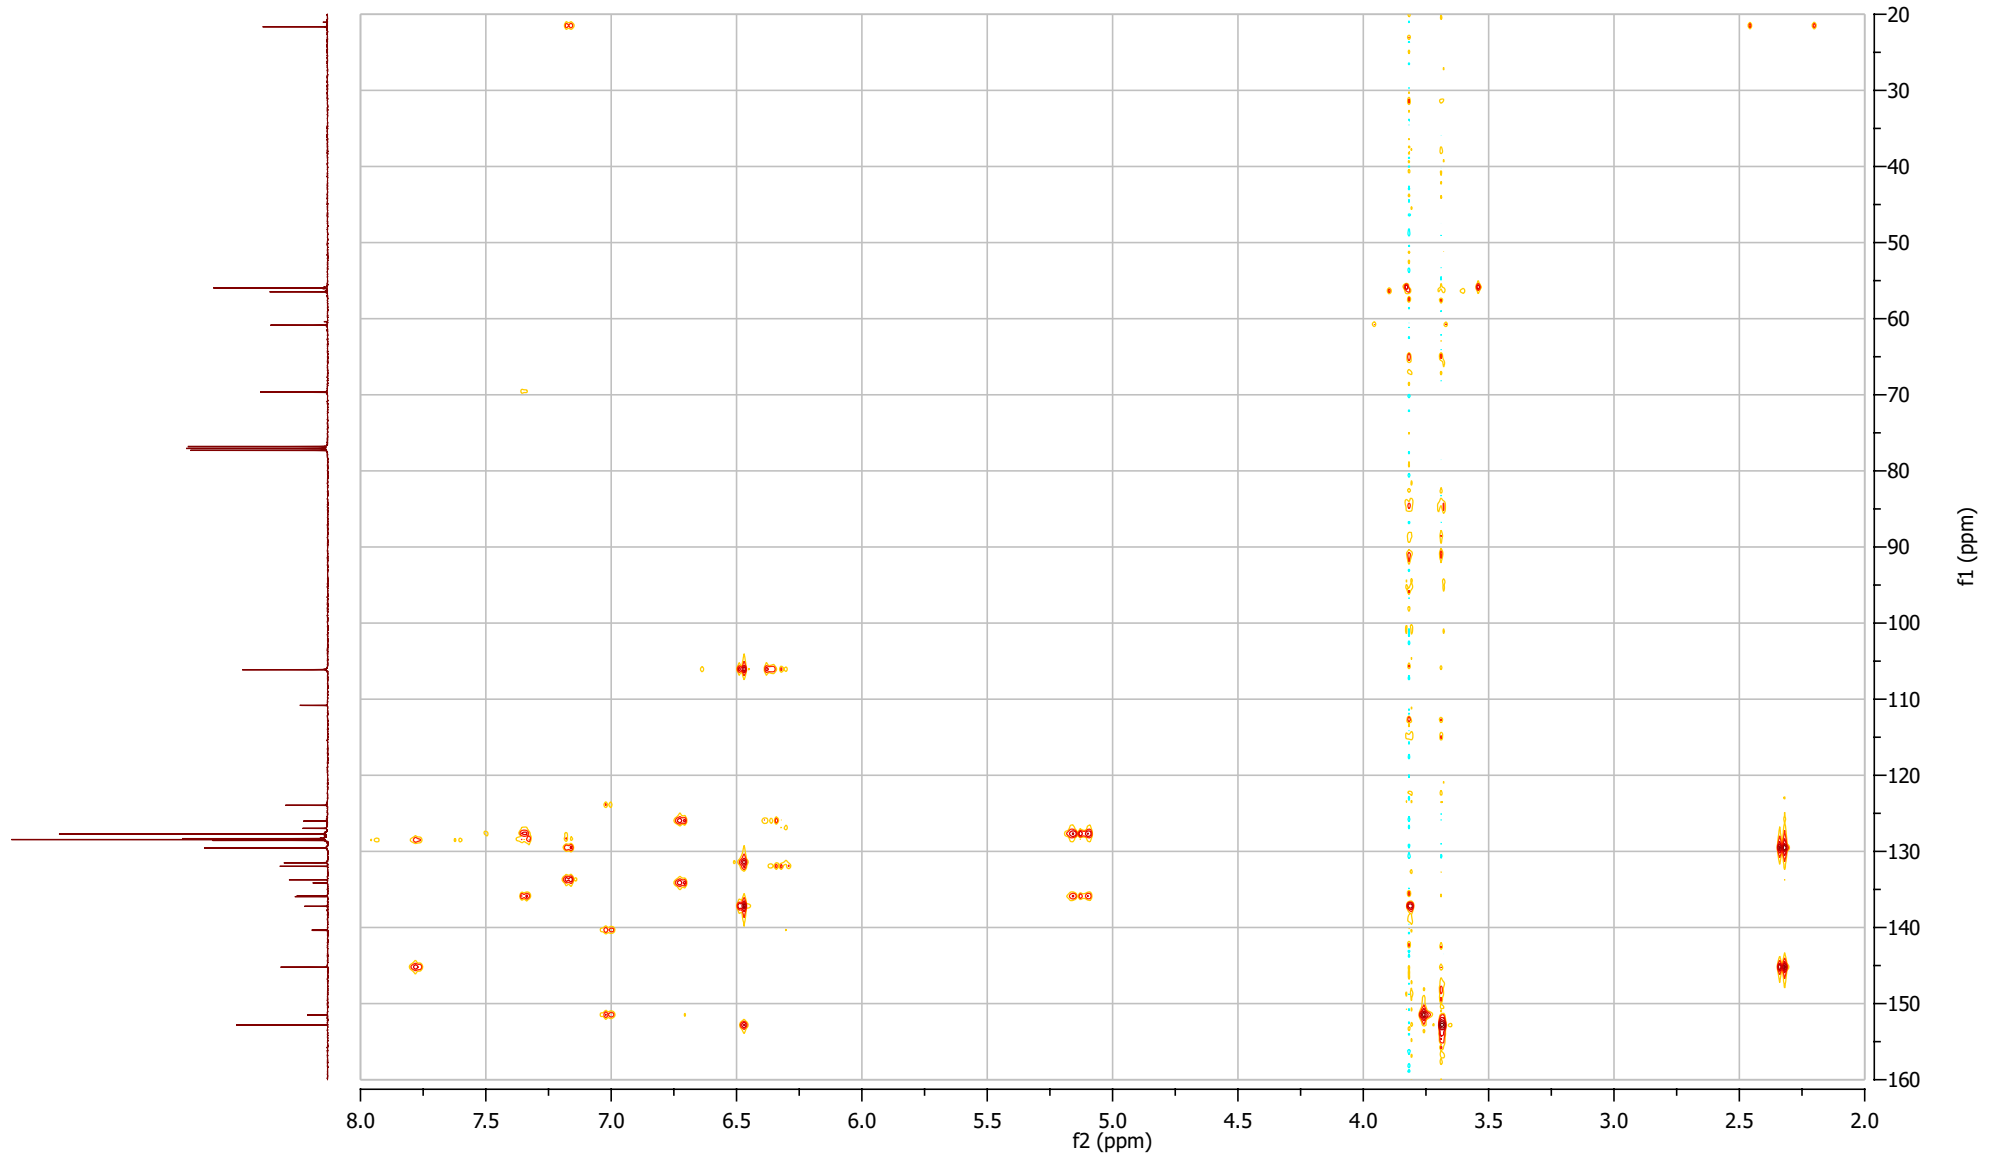

gHMBC for Compound 2b

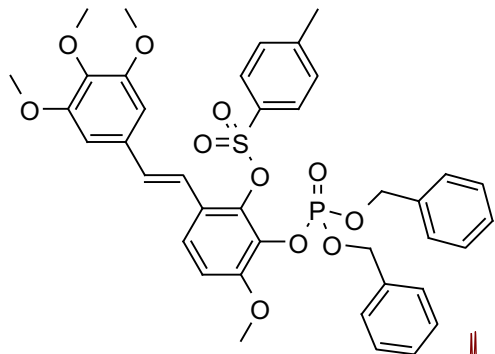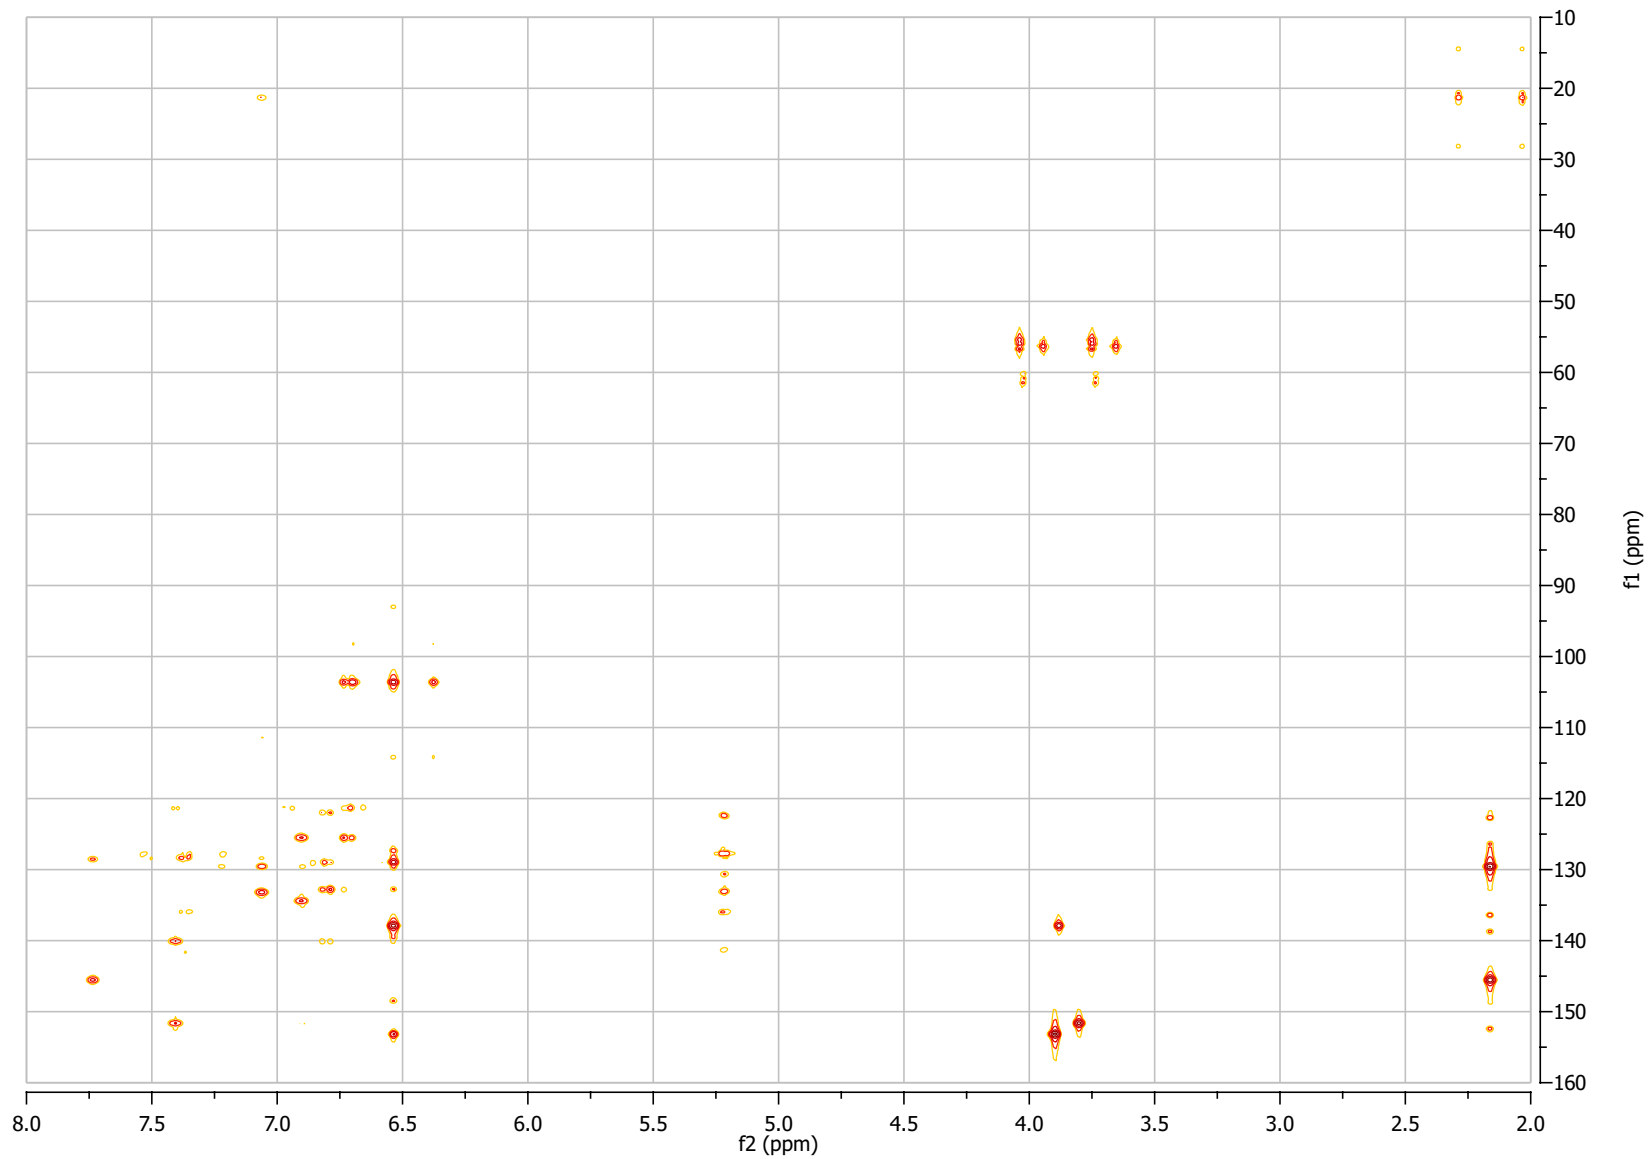

gHMBC for Compound 3a

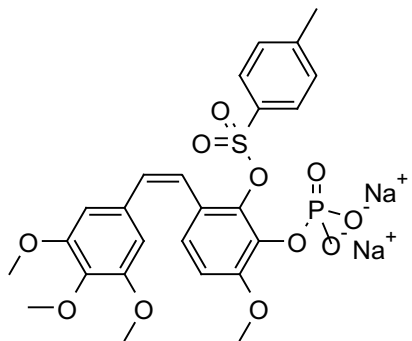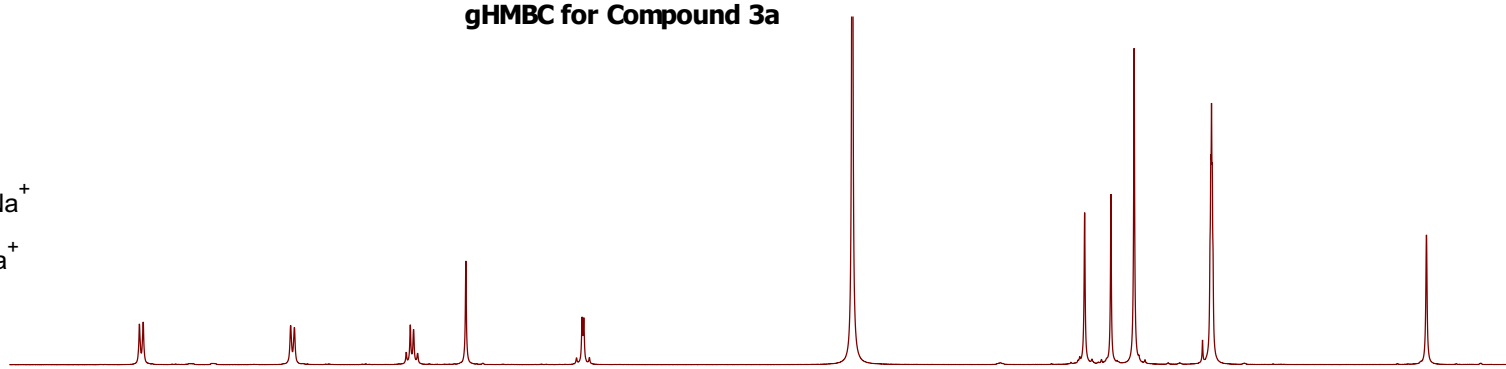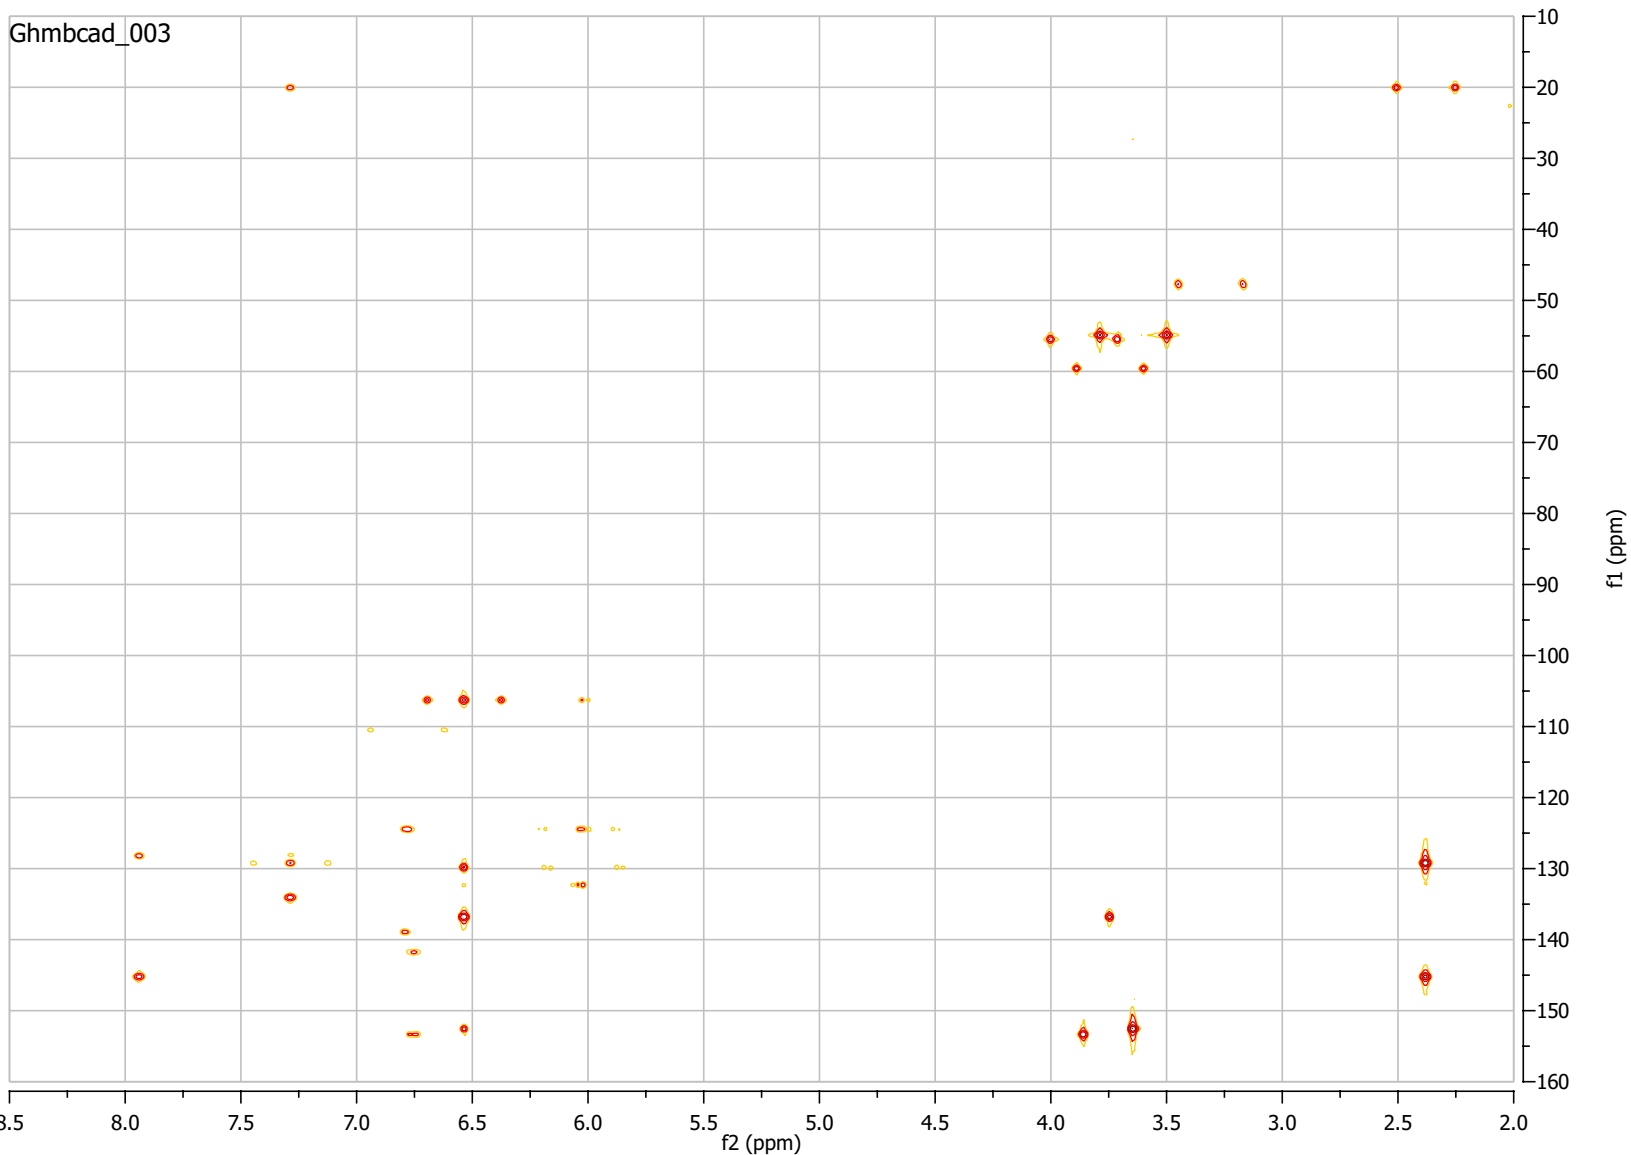

gHMBC for Compound 3b

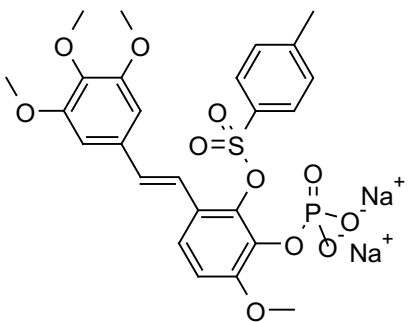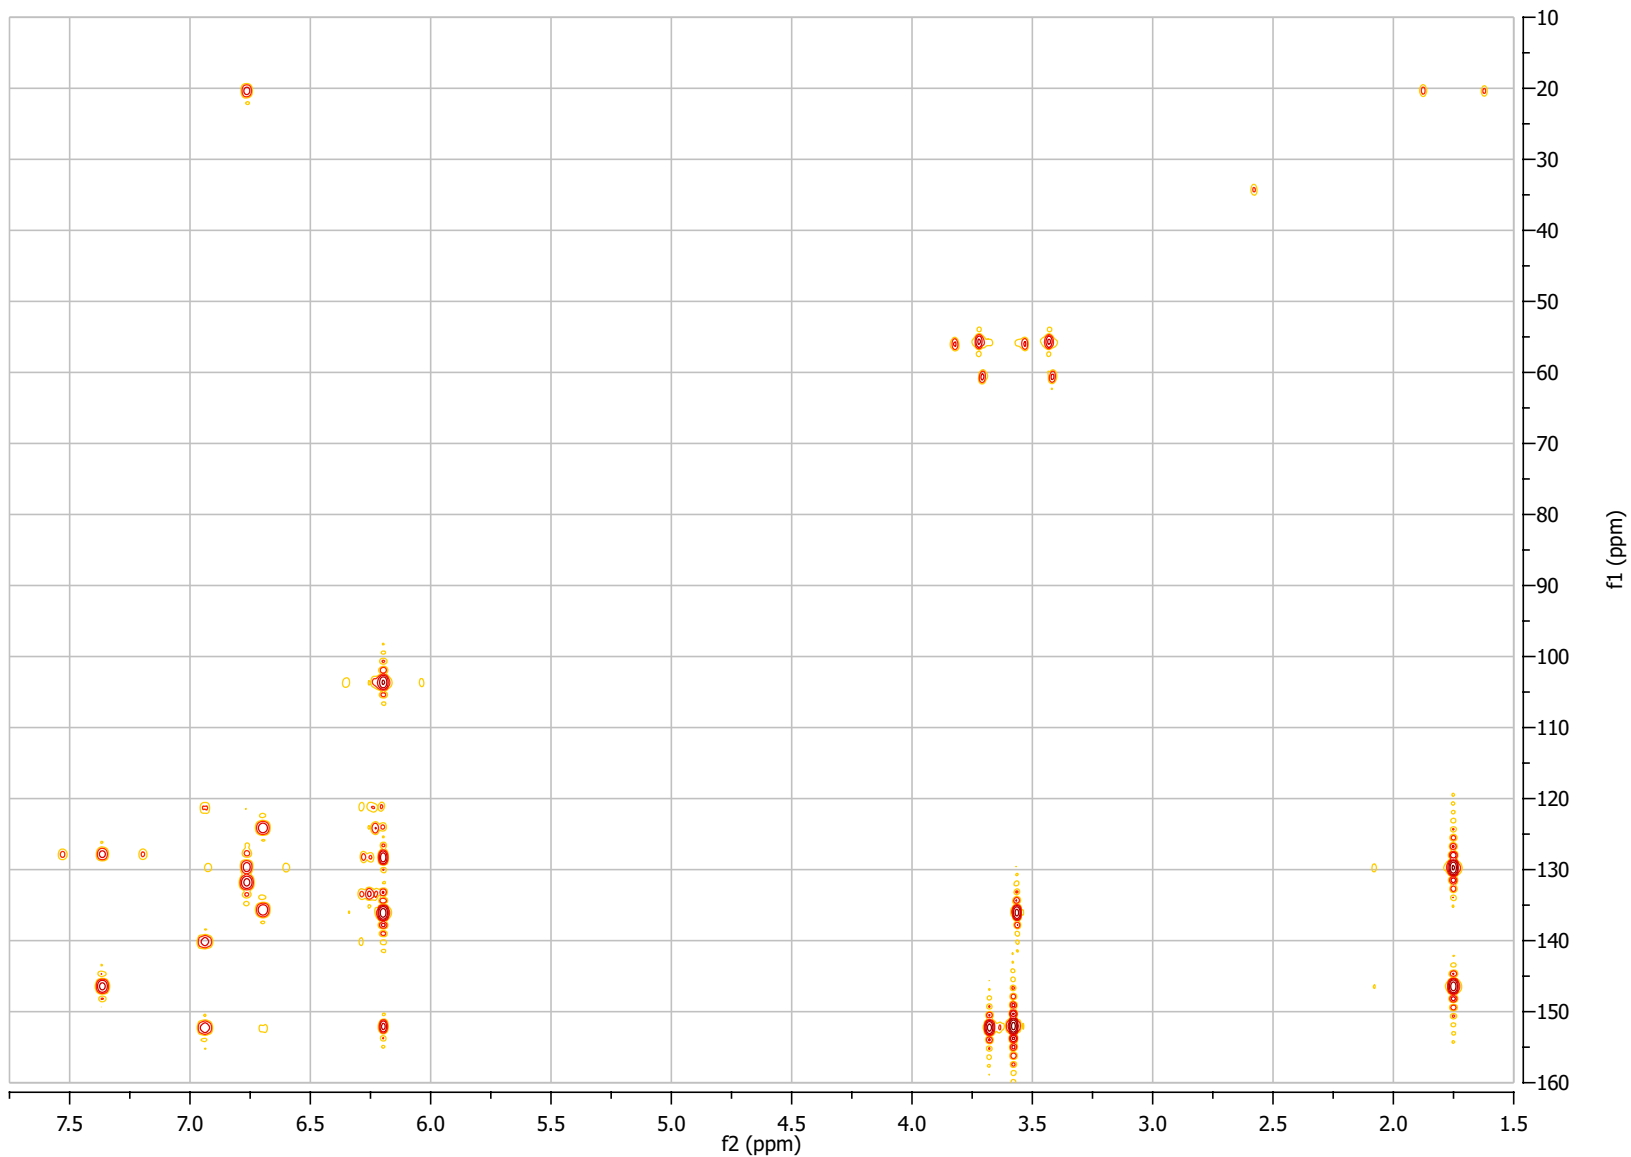



gHMBC for Compound 4a

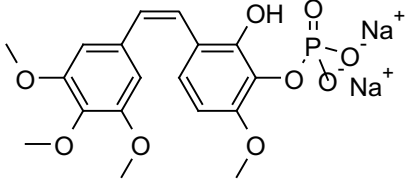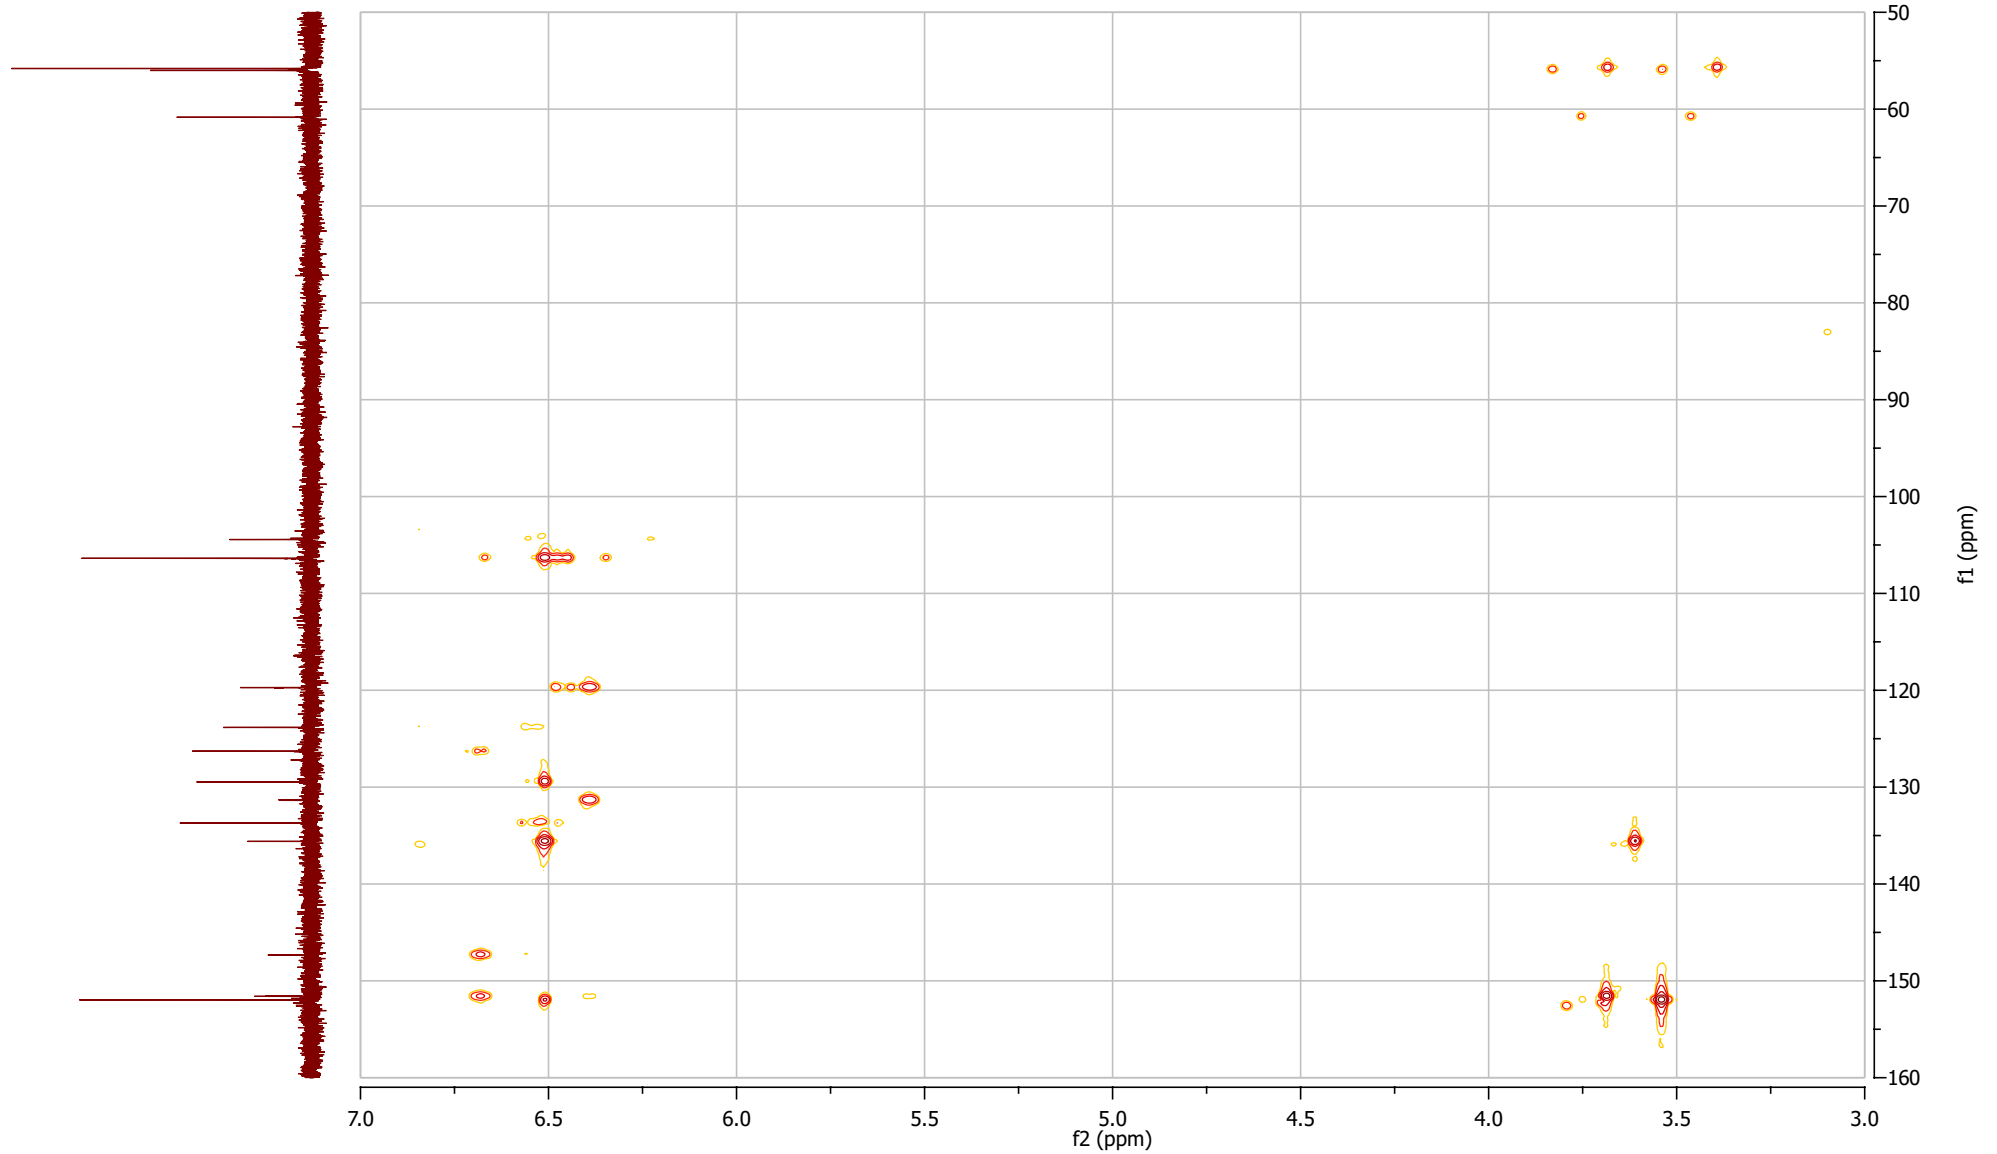

gHMBC for Compound 4b

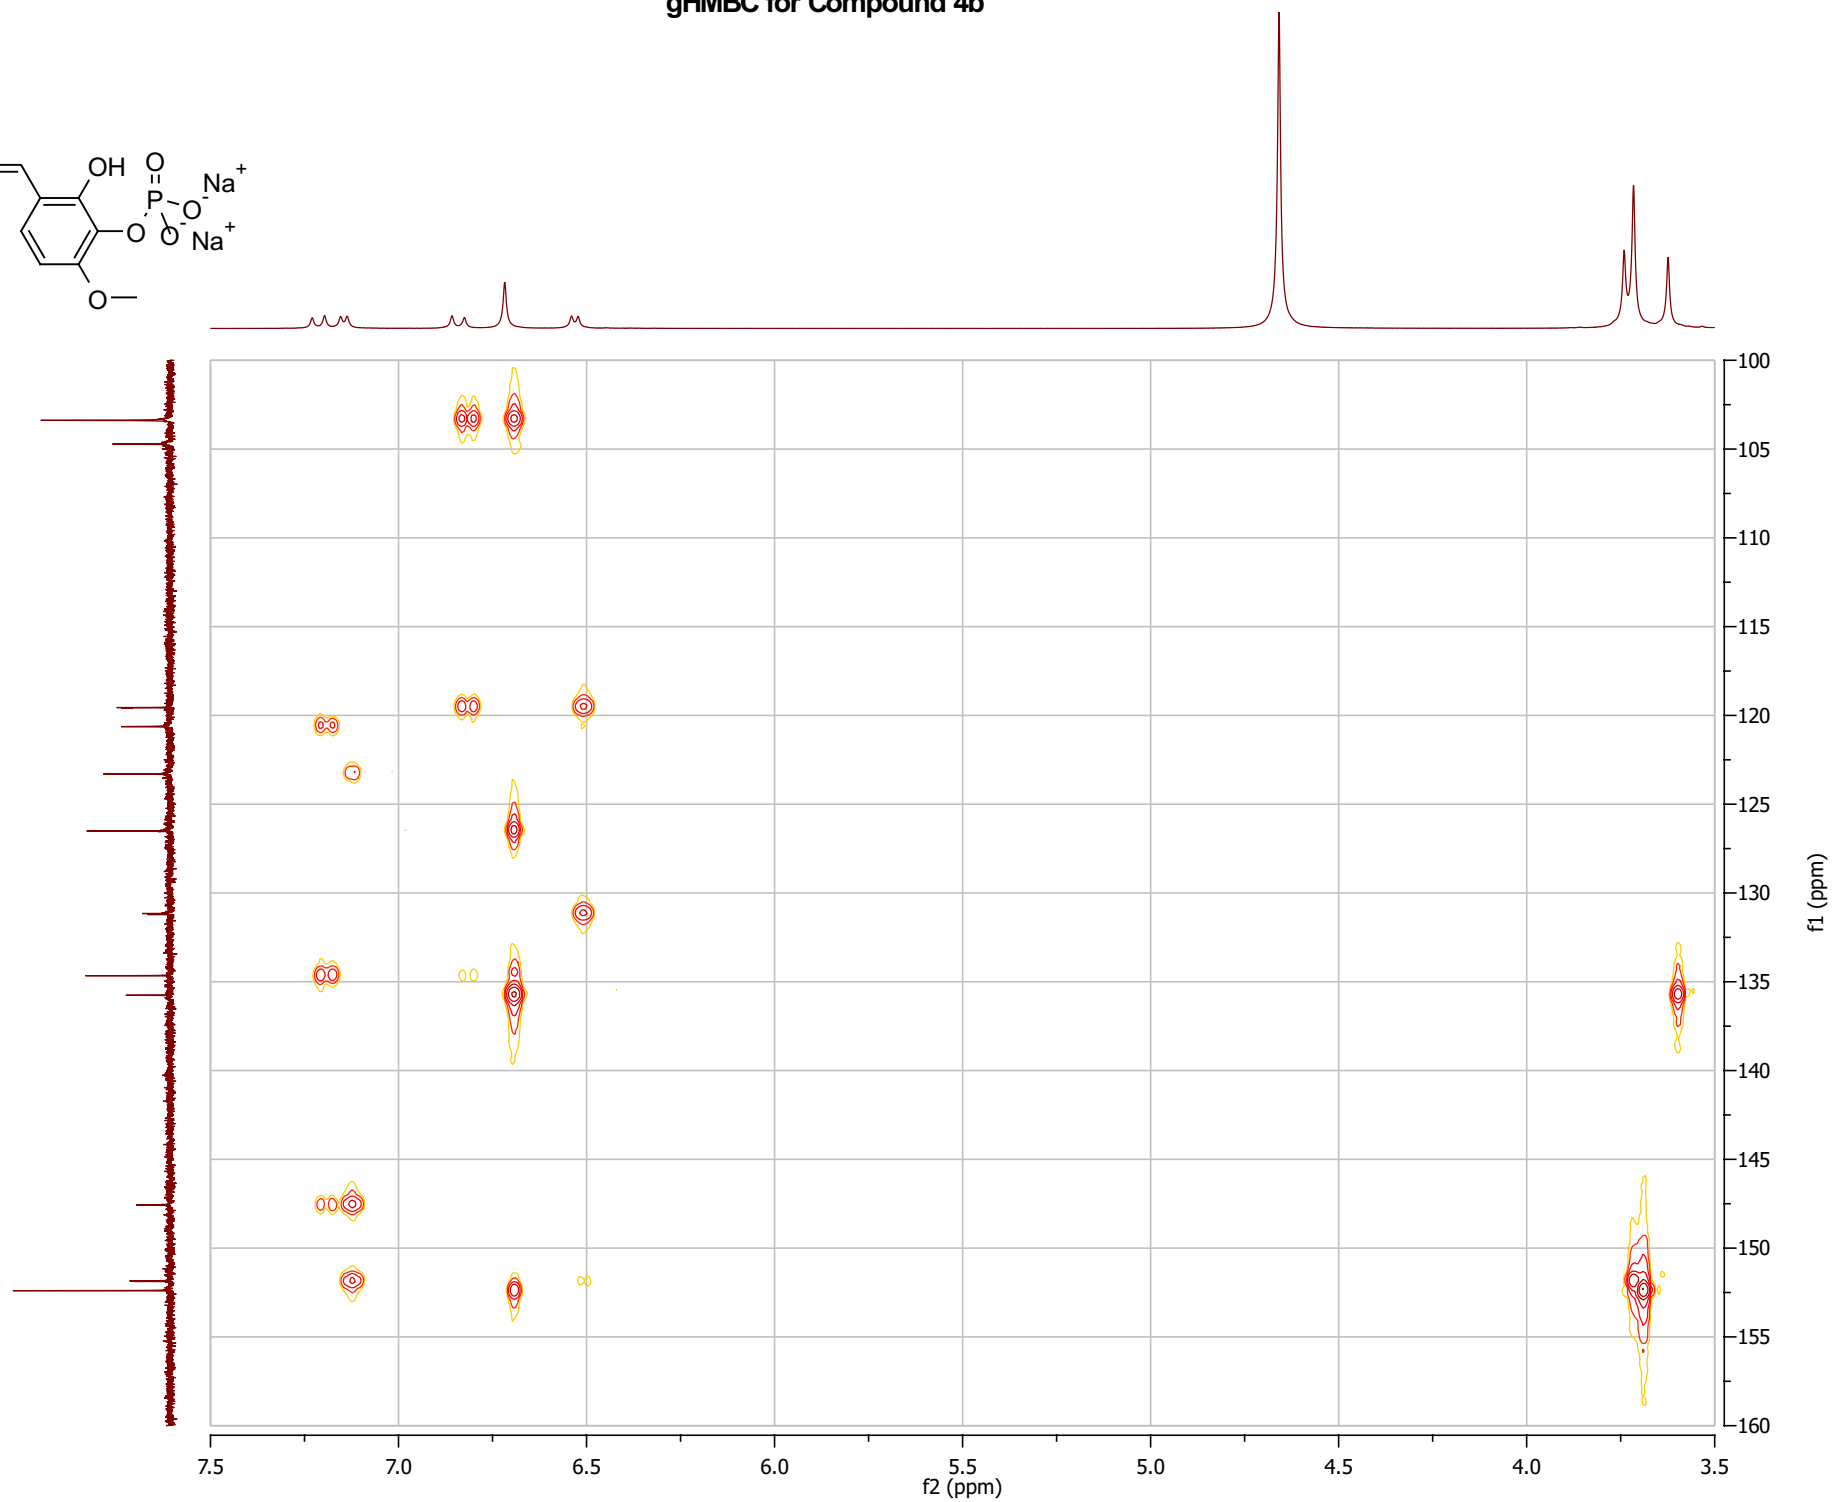

gHMBC for Compound 6a

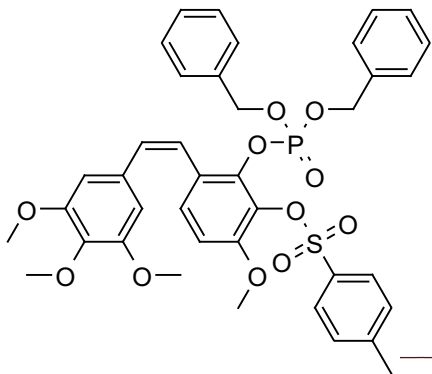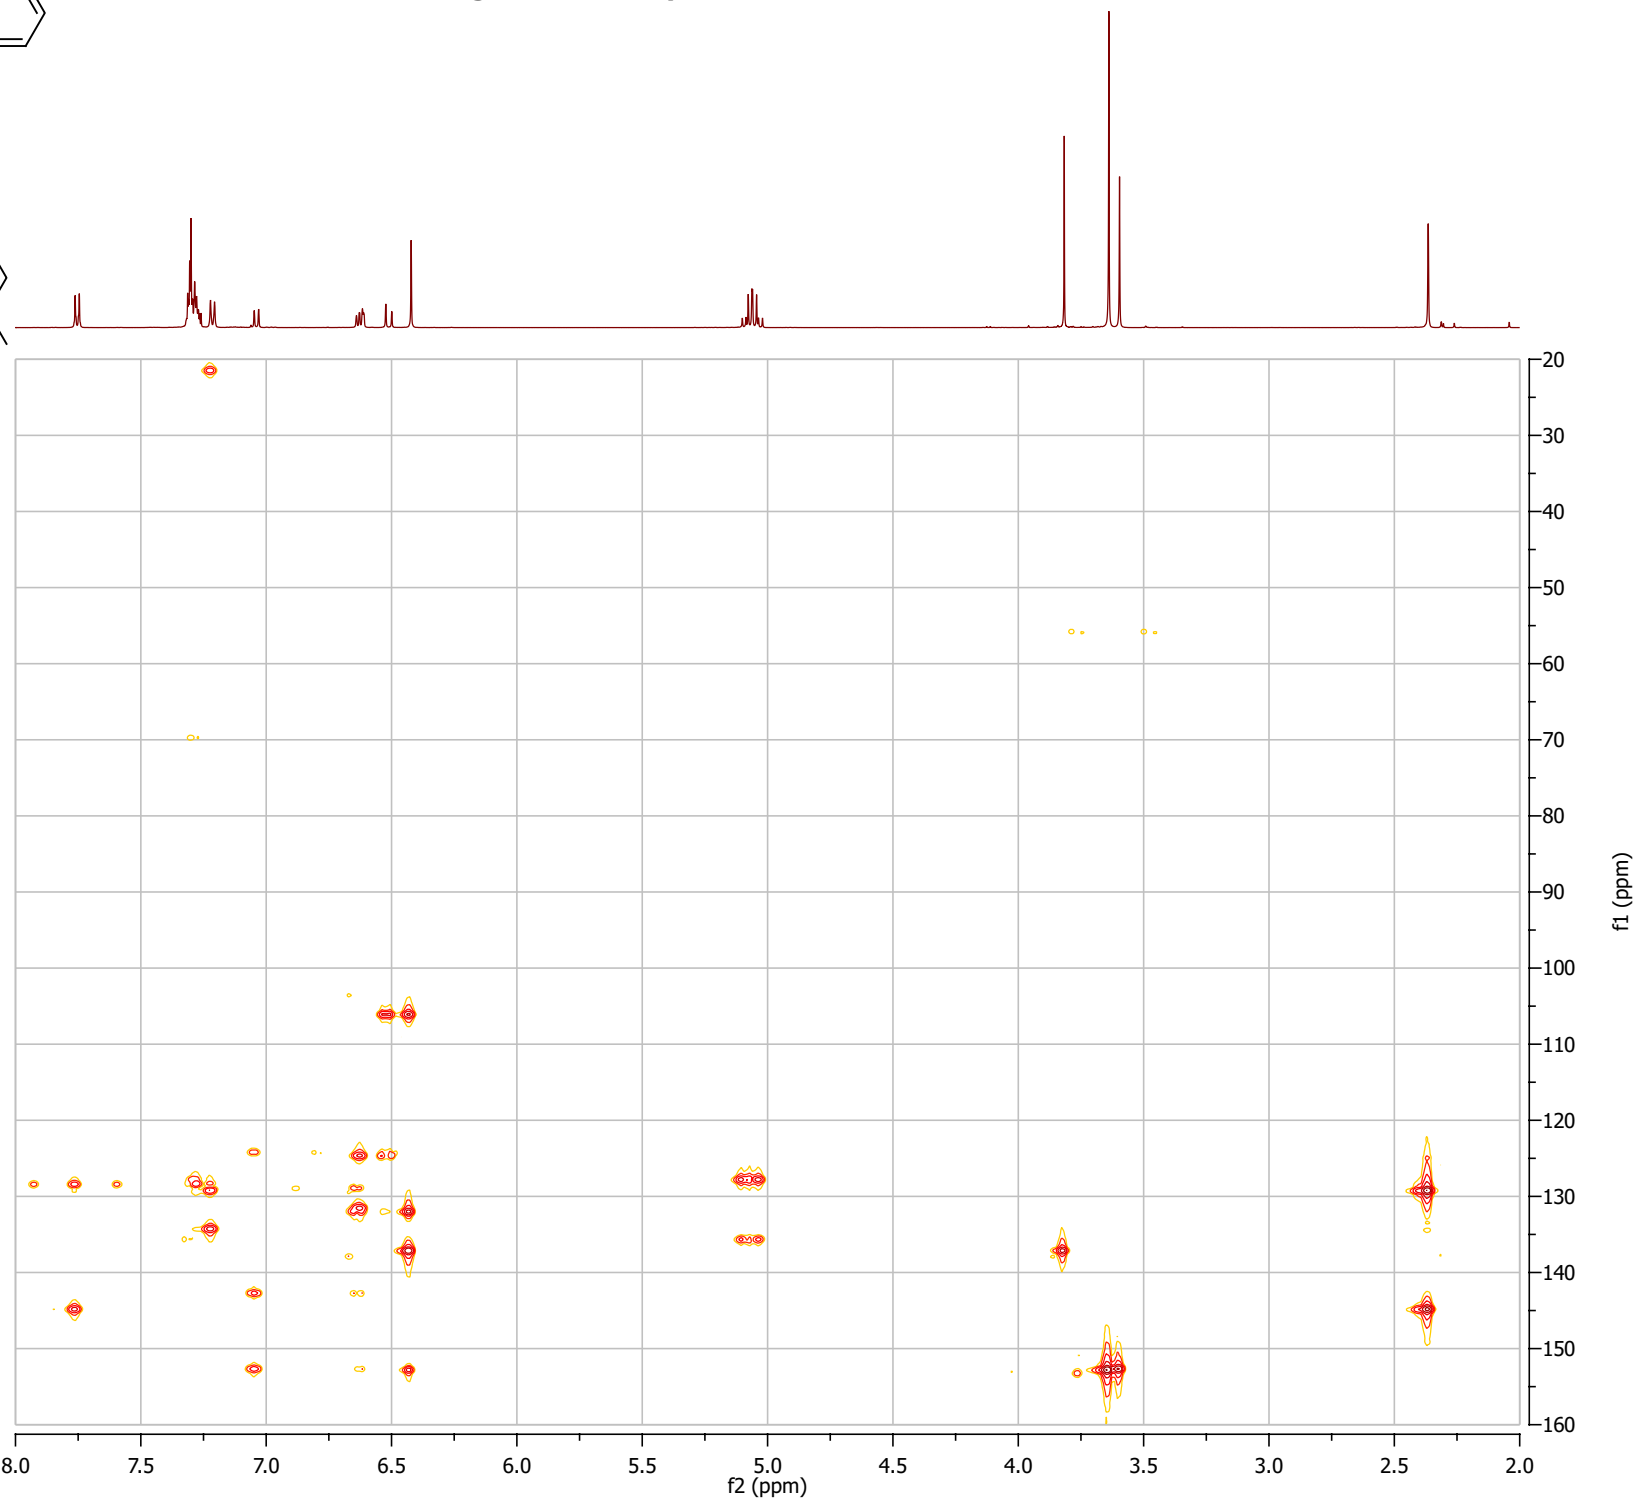

gHMBC for Compound 6b

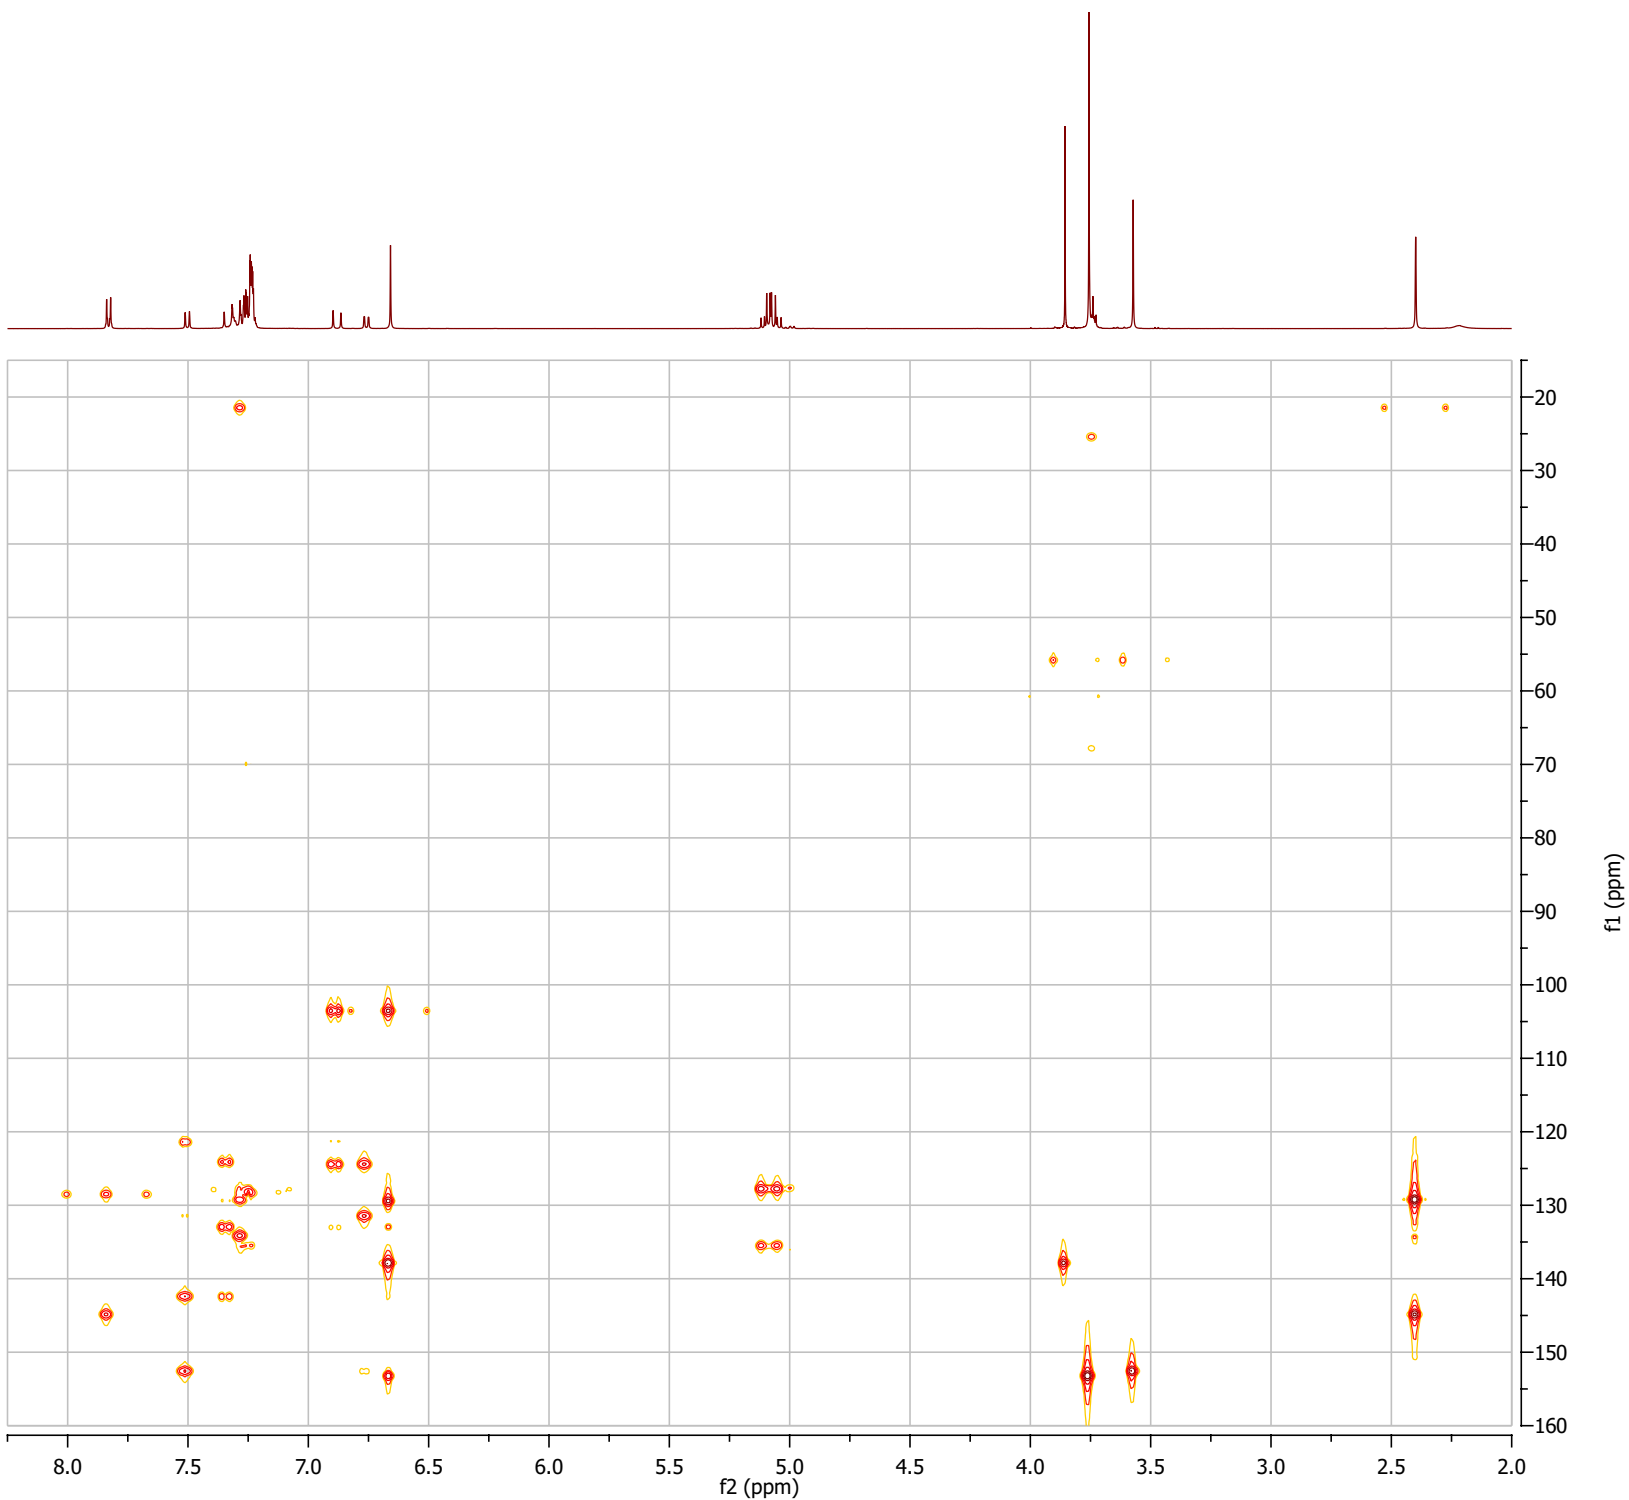

gHMBC for Compound 7a

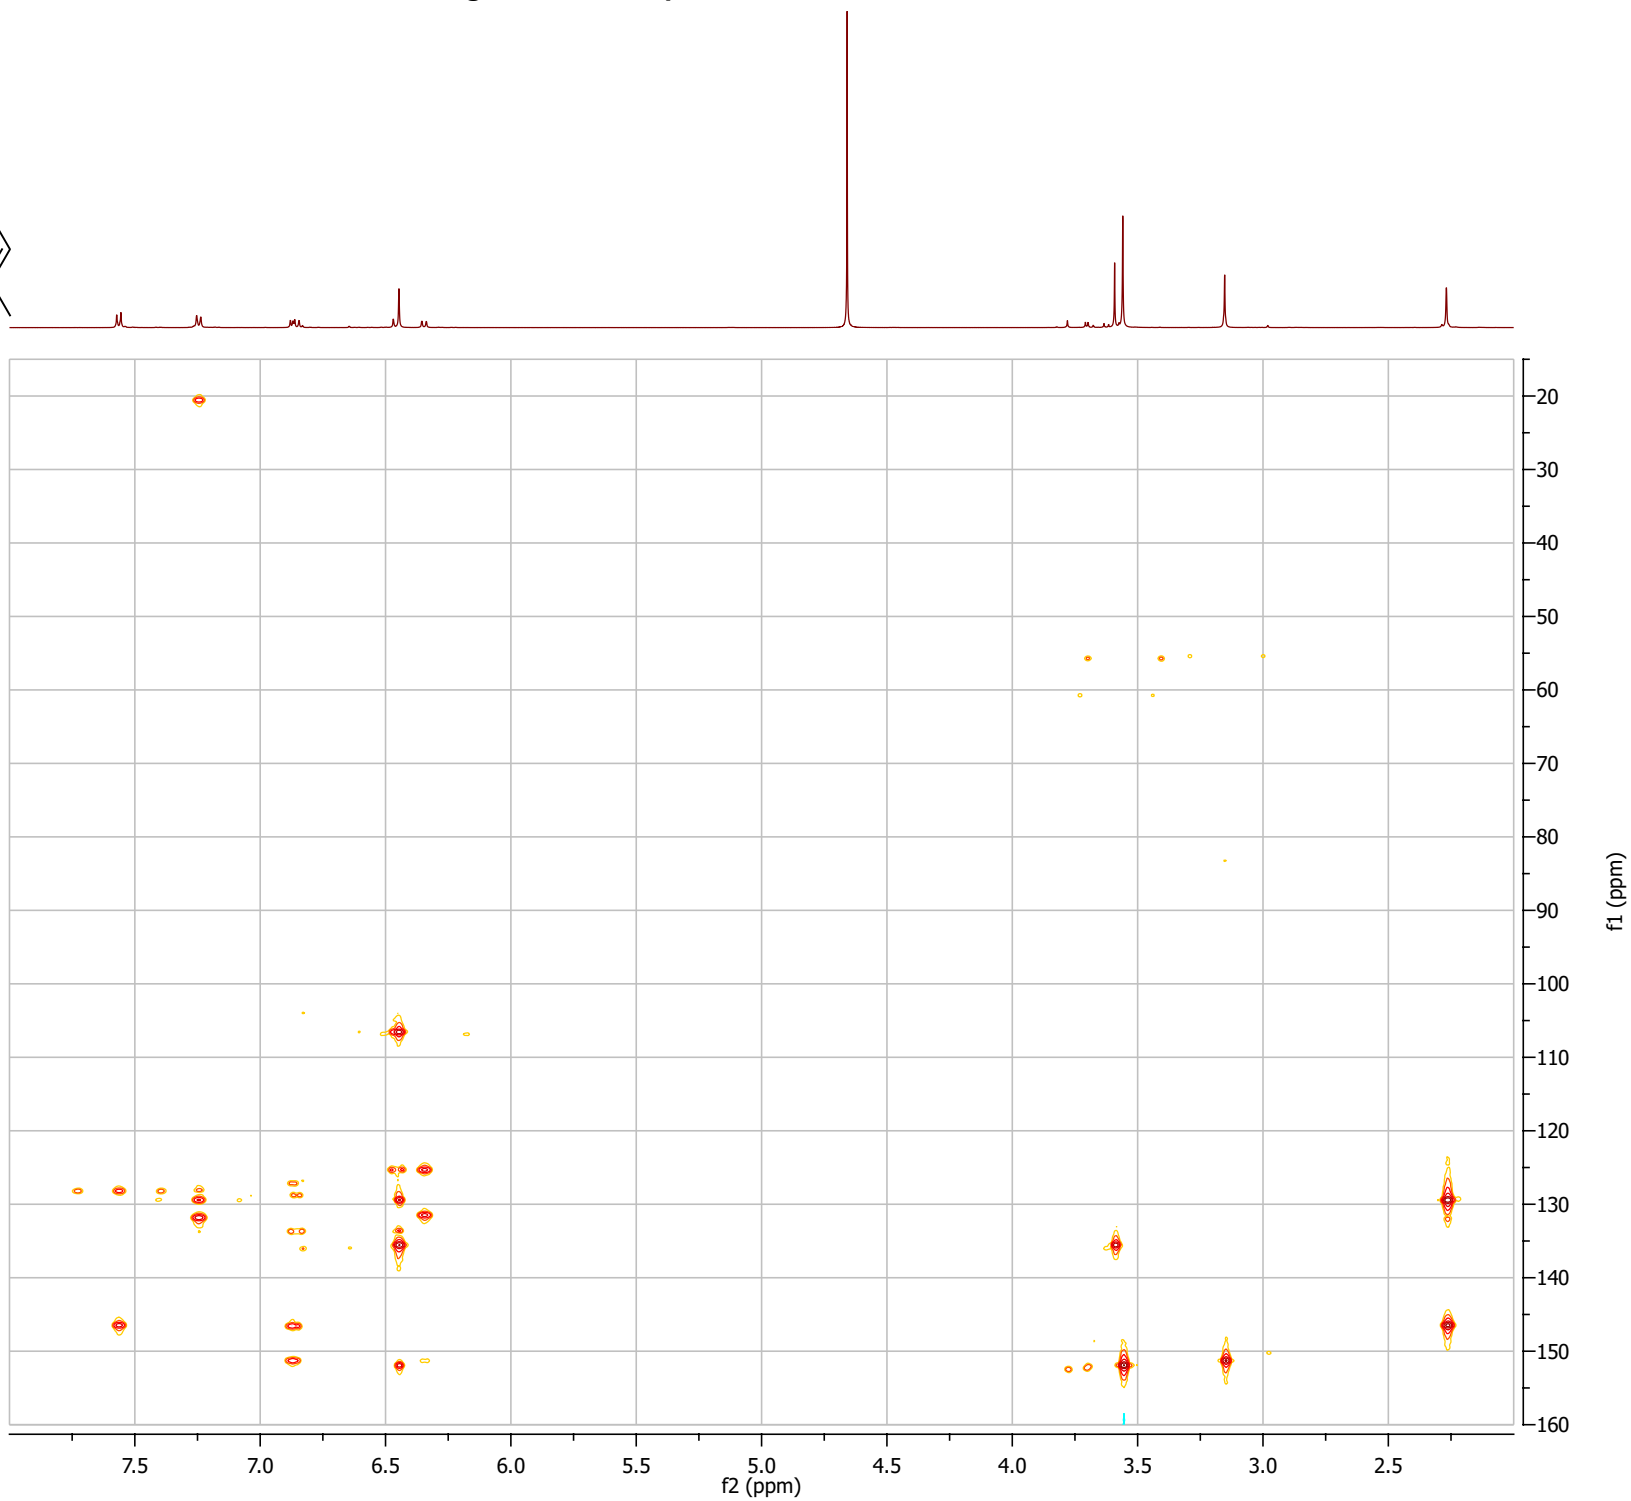

gHSQC for Compound 7b

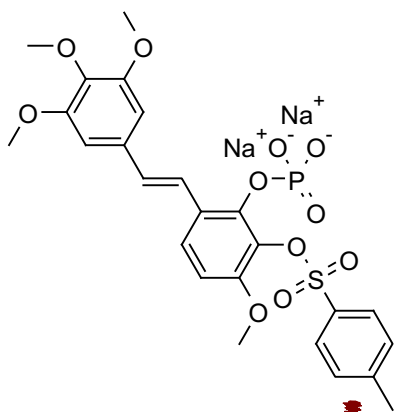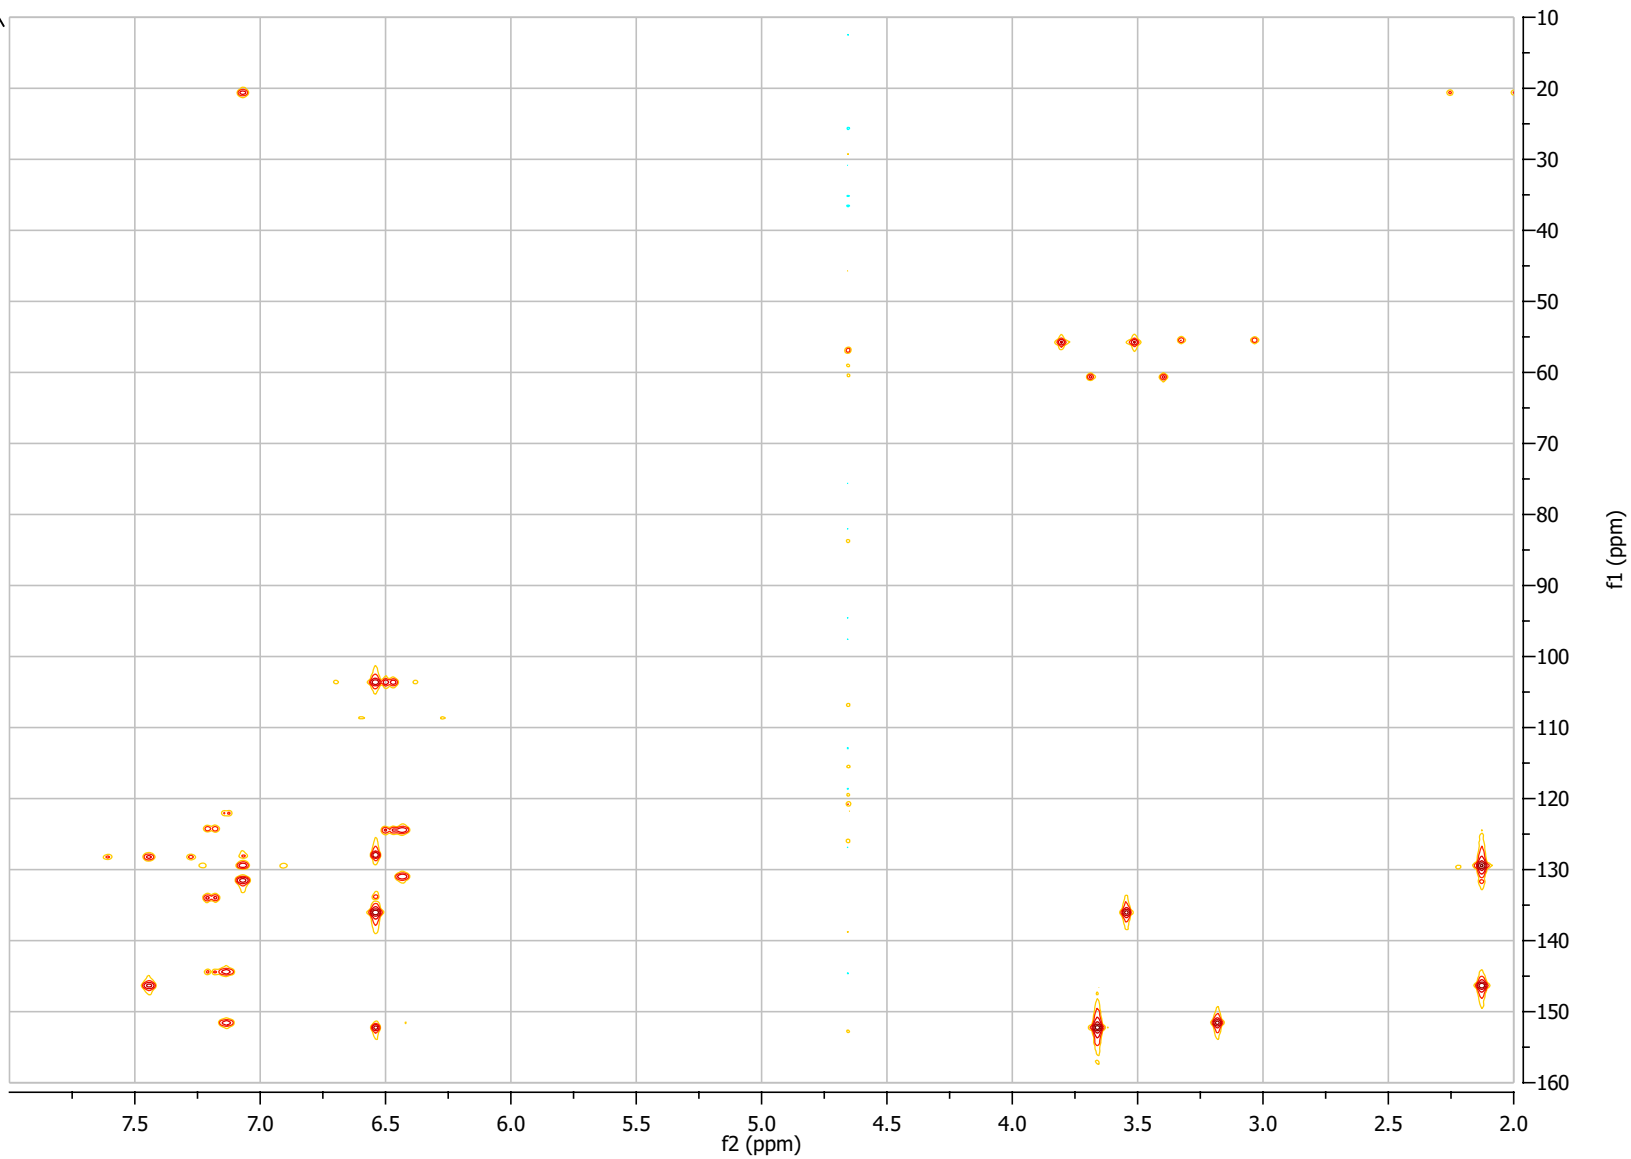

gHMBC for Compound 8a

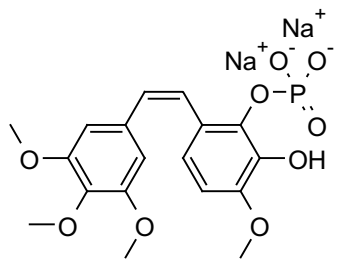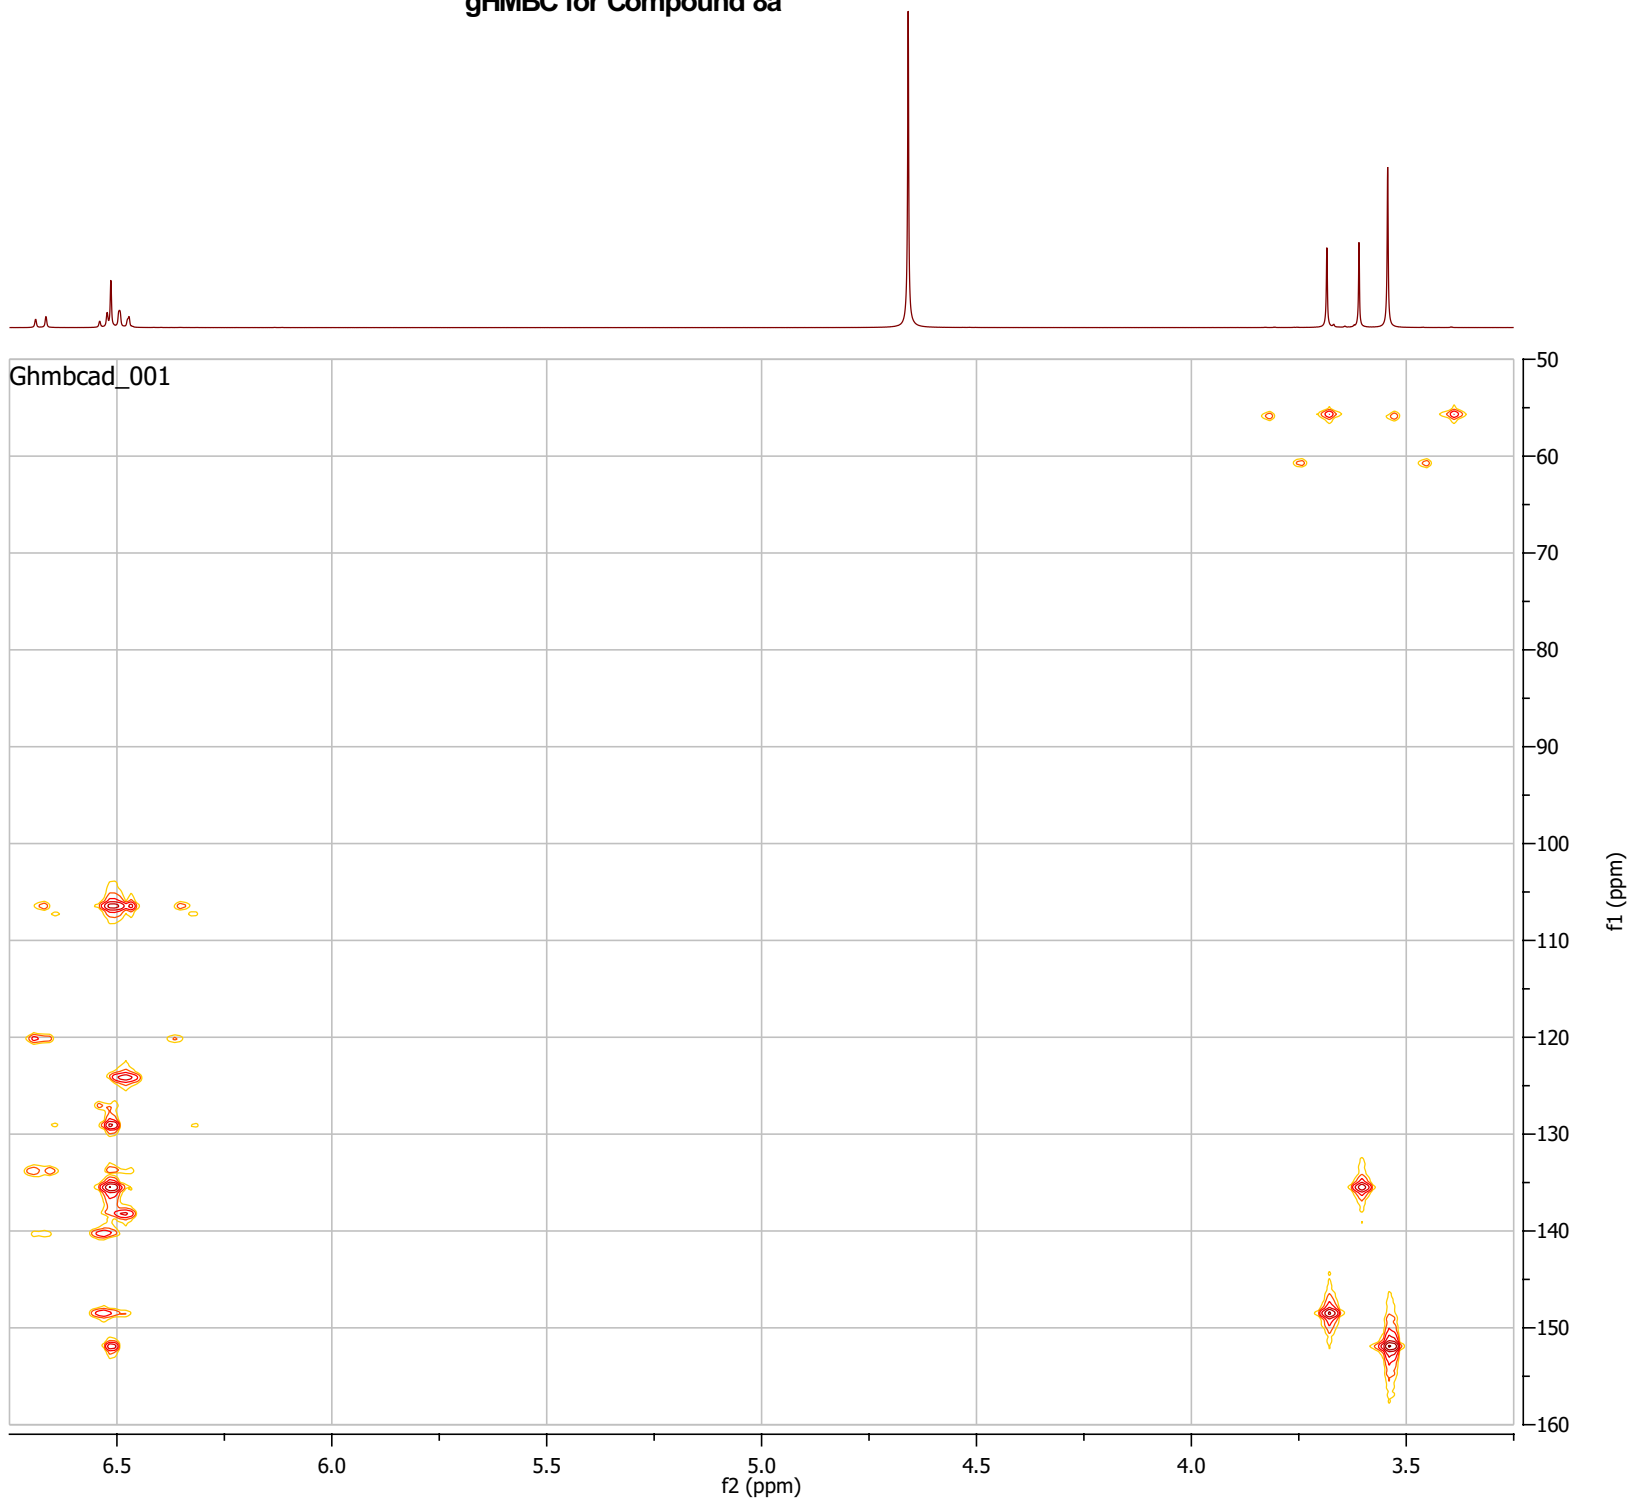

gHMBC for Compound 8b

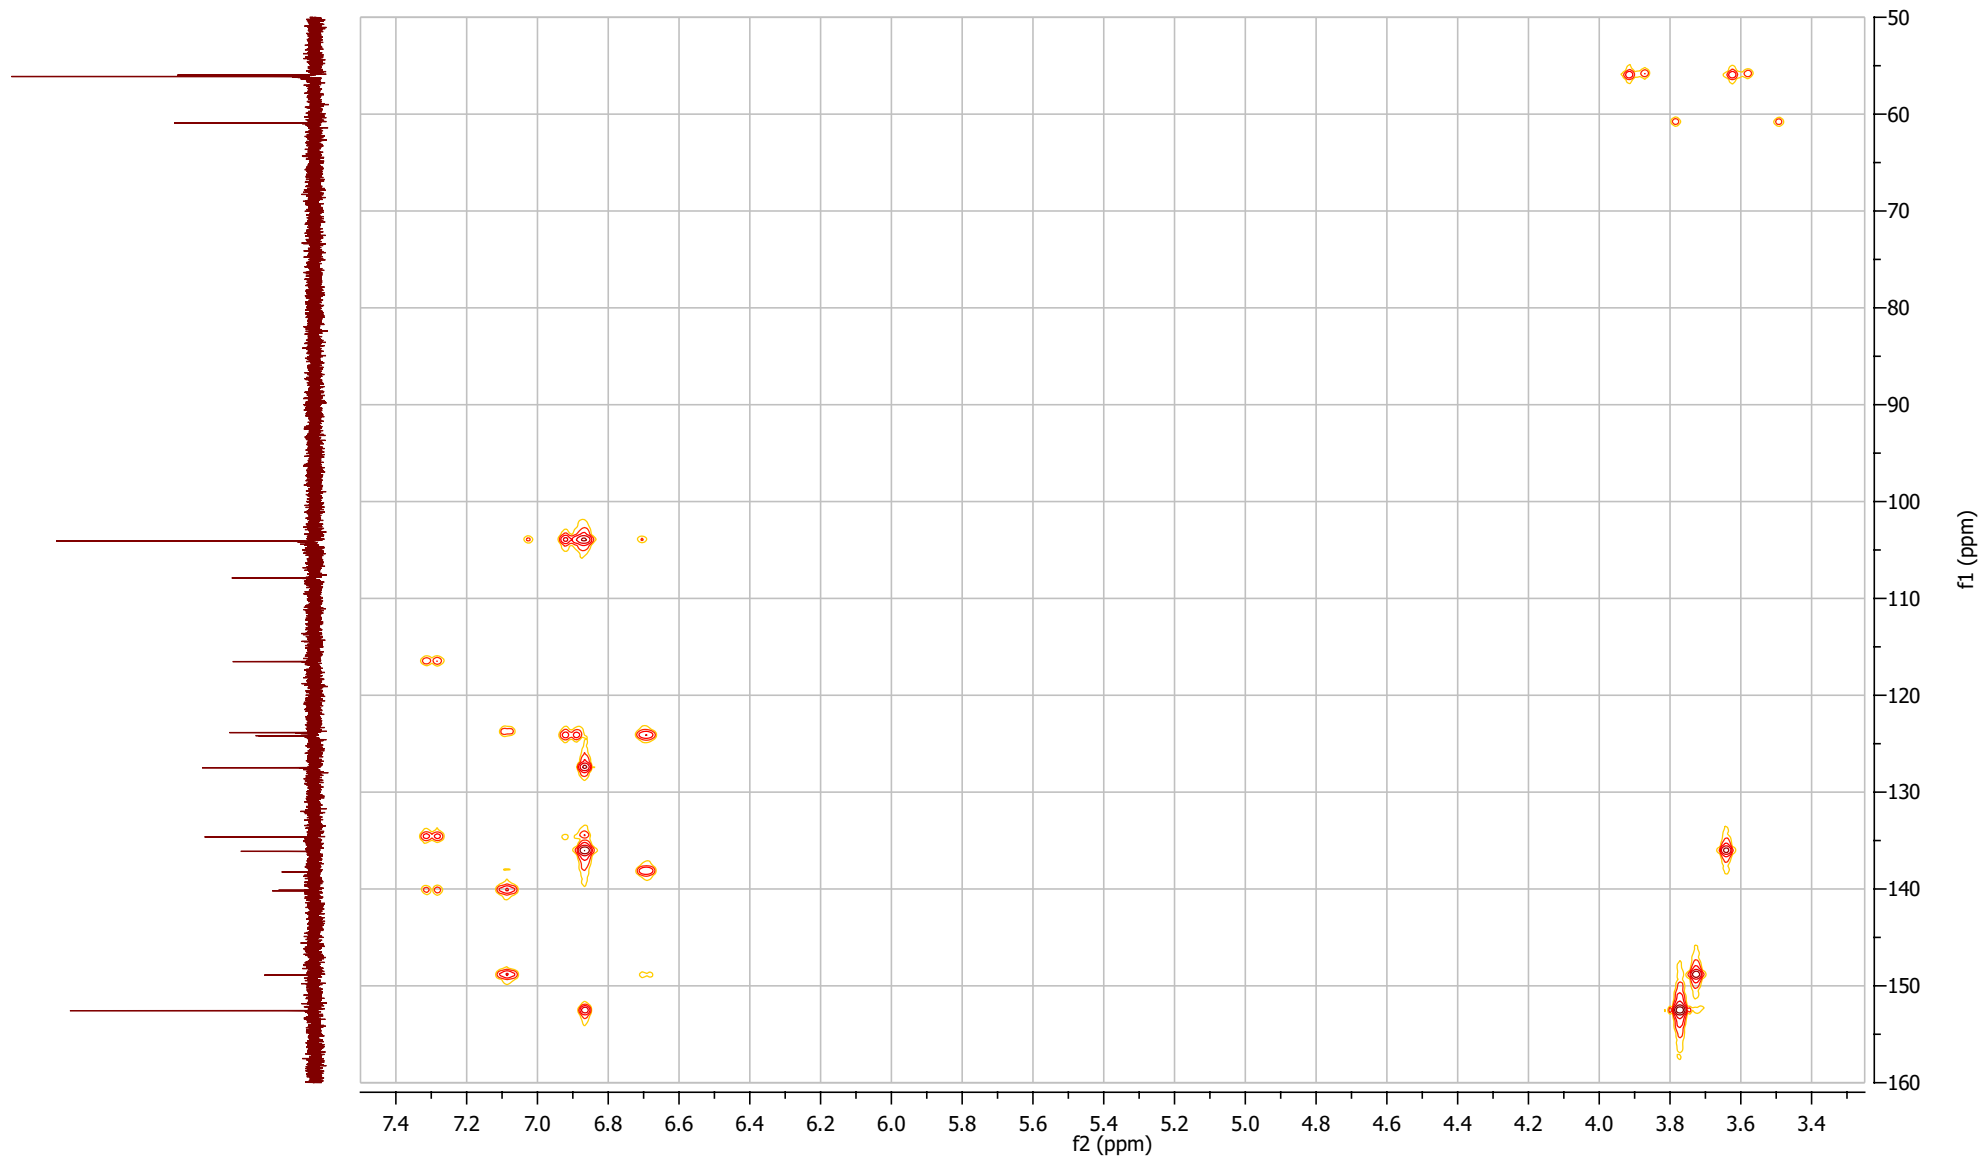



**Table S1.** NMR Spectroscopic Data (500 MHz, D<sub>2</sub>O) for (*Z*) Combretastatin A1 monophosphates **4a** and **8a**.

| Position            | <i>(Z)</i> -CA1-monophosphate A ( <b>4a</b> ) |                                | <i>(Z)</i> -CA1-monophosphate B ( <b>8a</b> ) |                                |
|---------------------|-----------------------------------------------|--------------------------------|-----------------------------------------------|--------------------------------|
|                     | $\delta_C$ , type                             | $\delta_H$ , ( <i>J</i> in Hz) | $\delta_C$ , type                             | $\delta_H$ , ( <i>J</i> in Hz) |
| 1                   | 133.7, C                                      |                                | 133.9, C                                      |                                |
| 2                   | 106.4, CH                                     | 6.65, s                        | 106.5, CH                                     | 6.66, s                        |
| 3                   | 152.0, C                                      |                                | 151.9, C                                      |                                |
| 4                   | 135.6, C                                      |                                | 135.5, C                                      |                                |
| 5                   | 152.0, C                                      |                                | 151.9, C                                      |                                |
| 6                   | 106.4, CH                                     | 6.65, s                        | 106.5, CH                                     | 6.66, s                        |
| 1a                  | 129.5, CH                                     | 6.60, d (12.0)                 | 129.1, CH                                     | 6.62, d (12.0)                 |
| 1'a                 | 126.3, CH                                     | 6.69, d (12.0)                 | 127.2, CH                                     | 6.82, d (12.0)                 |
| 1'                  | 119.7, C                                      |                                | 124.2, C                                      |                                |
| 2'                  | 147.3, C                                      |                                | 140.4, C                                      |                                |
| 3'                  | 131.3, C                                      |                                | 138.5, C                                      |                                |
| 4'                  | 151.6, C                                      |                                | 148.6, C                                      |                                |
| 5'                  | 104.4, CH                                     | 6.53, d (8.6)                  | 107.3, CH                                     | 6.64, d (8.7)                  |
| 6'                  | 123.8, CH                                     | 6.82, d (8.6)                  | 120.2, CH                                     | 6.67, d (8.7)                  |
| 3-OCH <sub>3</sub>  | 55.8, CH <sub>3</sub>                         | 3.69, s                        | 55.8, CH <sub>3</sub>                         | 3.69, s                        |
| 4-OCH <sub>3</sub>  | 60.8, CH <sub>3</sub>                         | 3.75, s                        | 60.9, CH <sub>3</sub>                         | 3.76, s                        |
| 5-OCH <sub>3</sub>  | 55.8, CH <sub>3</sub>                         | 3.69, s                        | 55.8, CH <sub>3</sub>                         | 3.69, s                        |
| 4'-OCH <sub>3</sub> | 56.0, CH <sub>3</sub>                         | 3.83, s                        | 56.0, CH <sub>3</sub>                         | 3.83, s                        |

**Table S2.** NMR Spectroscopic Data (500 MHz, D<sub>2</sub>O) for (*E*) Combretastatin A1 monophosphates **4b** and **8b**.

| Position            | <i>(E)</i> -CA1-monophosphate A ( <b>4b</b> ) |                                | <i>(E)</i> -CA1-monophosphate B ( <b>8b</b> ) |                                |
|---------------------|-----------------------------------------------|--------------------------------|-----------------------------------------------|--------------------------------|
|                     | $\delta_C$ , type                             | $\delta_H$ , ( <i>J</i> in Hz) | $\delta_C$ , type                             | $\delta_H$ , ( <i>J</i> in Hz) |
| 1                   | 134.7, C                                      |                                | 134.6, C                                      |                                |
| 2                   | 103.4, CH                                     | 6.86, s                        | 104.1, CH                                     | 7.03, s                        |
| 3                   | 152.4, C                                      |                                | 152.6, C                                      |                                |
| 4                   | 135.8, C                                      |                                | 136.1, C                                      |                                |
| 5                   | 152.4, C                                      |                                | 152.6, C                                      |                                |
| 6                   | 103.4, CH                                     | 6.86, s                        | 104.1, CH                                     | 7.03, s                        |
| 1a                  | 126.5, CH                                     | 6.98, d (16.4)                 | 127.5, CH                                     | 7.07, d (16.6)                 |
| 1'a                 | 123.3, CH                                     | 7.36, d (16.4)                 | 123.9, CH                                     | 7.46, d (16.6)                 |
| 1'                  | 119.6, C                                      |                                | 124.2, C                                      |                                |
| 2'                  | 147.6, C                                      |                                | 140.2, C                                      |                                |
| 3'                  | 131.3, C                                      |                                | 138.3, C                                      |                                |
| 4'                  | 151.9, C                                      |                                | 148.9, C                                      |                                |
| 5'                  | 104.7, CH                                     | 6.67, d (8.7)                  | 107.9, CH                                     | 6.86, d (8.8)                  |
| 6'                  | 120.6, CH                                     | 7.29, d (8.7)                  | 116.5, CH                                     | 7.25, d (8.8)                  |
| 3-OCH <sub>3</sub>  | 55.8, CH <sub>3</sub>                         | 3.86, s                        | 56.1, CH <sub>3</sub>                         | 3.94, s                        |
| 4-OCH <sub>3</sub>  | 60.8, CH <sub>3</sub>                         | 3.77, s                        | 60.9, CH <sub>3</sub>                         | 3.81, s                        |
| 5-OCH <sub>3</sub>  | 55.8, CH <sub>3</sub>                         | 3.86, s                        | 56.1, CH <sub>3</sub>                         | 3.94, s                        |
| 4'-OCH <sub>3</sub> | 55.9, CH <sub>3</sub>                         | 3.88, s                        | 56.0, CH <sub>3</sub>                         | 3.89, s                        |
